# Supplementary material for: Genome streamlining in a minute herbivore that manipulates its host plant
Source: eLife journal article supplement (doi:10.7554/elife.56689), 2020-10-23
Supplement: supp [file elife-56689-supp-v1.zip]

|                    |     |                                                                                                         |     |
|--------------------|-----|---------------------------------------------------------------------------------------------------------|-----|
| Dm_FBpp0080927     | 706 | L N Q R H R S H A H A H A L Q L N S A P N S S A A S S P A S A D L Q A G R L L Q A P S Q L C A V C G D T | 755 |
| Tu_tetur10g04690   | 482 | V P S I K S Q K A S T S E T N T G C S S A A T - - - - L N T S S T G H P L N Q L C A V C G D N           | 525 |
| Dpte.g8591.t1      | 813 | N V S Q S S T I S N K S I T G R G N S S G G G G - - - - H K T K S T T - - L Q T C A V C G D V           | 853 |
| Al_aculy02g15950.1 | 315 | H H Q H H H H H Q H Q H Q Q Q Q Q - - - - - - - - - - Q P V C A V C G D Y                               | 341 |

←

  

|                    |     |                                                                                                     |     |
|--------------------|-----|-----------------------------------------------------------------------------------------------------|-----|
| Dm_FBpp0080927     | 756 | A A C Q H Y G V R T C E G C K G F F K R T V Q K G S K Y V C L A D K N C P V D K R R R N R C Q F C R | 805 |
| Tu_tetur10g04690   | 526 | A A C Q H Y G V R T C E G C K G F F K R T V Q K G S K Y V C L G N R D C P V D K R R R N R C Q F C R | 575 |
| Dpte.g8591.t1      | 854 | A A C Q H Y G V L T C E G C K G F F K R T V Q K G S K Y T C L G N K D C I V D K R R R N R C Q F C R | 903 |
| Al_aculy02g15950.1 | 342 | A A C Q H Y G V R T C E G C K G F F K R S V Q K N T K Y V C S G S M D C I V D K R R R N R C O Y C R | 391 |

←

  

|                    |     |                                                                                                     |     |
|--------------------|-----|-----------------------------------------------------------------------------------------------------|-----|
| Dm_FBpp0080927     | 806 | F Q K C L V V G M V K E V V R T D S L K G R R G R L P S K P K S P Q E - - - - S P P S P P I S L I   | 850 |
| Tu_tetur10g04690   | 576 | F Q K C L A V G M V K E V V R T D N L K G R R G R L P S K P K S P Q E - - - - S P P S P P I S L I   | 620 |
| Dpte.g8591.t1      | 904 | F Q K C L T V G M V K E V V R T D S L K G R R G R L P S K P K S P H Q L D Q L G Q R K L P P I S T I | 953 |
| Al_aculy02g15950.1 | 392 | Y K R C L D V G M V R E G V R T D S L K G R R G R L P S K P K S - - - - P I G A T                   | 428 |

## DBD

|                    |      |                                                            |      |
|--------------------|------|------------------------------------------------------------|------|
| Dm_FBpp0080927     | 851  | TALVVRSHVDTTPDPSCLDVSHYEEQSMSEADKV - - - - - QQFYQLTL      | 891  |
| Tu_tetur10g04690   | 621  | TALVRAHVEDSTCPDISNLDLSHYCE - - MEETSTL - - YPNVLSRQQFVSLML | 666  |
| Dpte.g8591.t1      | 954  | ASLLKAHEDESSVNKANLDFSRFENDNFDEQINICNQYQQDLFDHEITLS         | 1003 |
| Al_aculy02g15950.1 | 429  | T - - - - - NVGSLQVMSDALV                                  | 442  |
|                    |      | ←                                                          |      |
| Dm_FBpp0080927     | 892  | SSVDVIKQFAEKIPGYFDLPEDQELLFQSASLELFVLRLAYR - - ARIDD       | 939  |
| Tu_tetur10g04690   | 667  | SSMDVCKNFAEKIPGFSDLDKNDQELLFFSSCLEMITLRMVYQ - - NKPGS      | 714  |
| Dpte.g8591.t1      | 1004 | SSLDNLWLFIERIPGFHELNELDRKTLFQNSCLELFALRLAYRLIENNNDN        | 1053 |
| Al_aculy02g15950.1 | 443  | ASMLATSN - - - - - QQQQQQLSHQQ - - - - - HQPQH             | 466  |
| Dm_FBpp0080927     | 940  | TKLIFCNGTVLHRTQCLRSFGEWLNDIMEFSSRLSHNLLEITDIDISAFACLAL     | 989  |
| Tu_tetur10g04690   | 715  | KKLILPNGMVLHRRNQVKLLFGSWFTNLESFSQRFAQIDIDISAFACLAL         | 764  |
| Dpte.g8591.t1      | 1054 | NILILCNINVLHRRNQFKFTLGEWLPMIEELSKQLQSMNLDLNAFVCLCAL        | 1103 |
| Al_aculy02g15950.1 | 467  | HQ - - - - - HQLPARLAGG - - - - - GL                       | 481  |
| Dm_FBpp0080927     | 990  | TLITERHGLREPKKVEQLQMKITIGSLRDHVTYNAAEAQKKQHIFYSSRLGKL      | 1039 |
| Tu_tetur10g04690   | 765  | SLITVRHGLVDPNRVEALQMKITIGSLRDHVTYNAAEAQKKSHYFSSILSKL       | 814  |
| Dpte.g8591.t1      | 1104 | TVITARDCIKDSNQIEQIENKILNSLRDHTIYNAAEAQKKFNIFYSKILTKL       | 1153 |
| Al_aculy02g15950.1 | 482  | HLGSHHHQHQHQGQQHQNQ - H LHQSSQHHQHQQHQHQHHHHHLHHSQ         | 530  |
| Dm_FBpp0080927     | 1040 | PELRSLSVQGLQRIFYLKLEDL - - - - -                           | 1061 |
| Tu_tetur10g04690   | 815  | PDLRSLAMDGLTMLHEIKLES - - - - -                            | 836  |
| Dpte.g8591.t1      | 1154 | SELRTIIGFG - QRIRIMKKIQQLSTSSSSSTLSASSTSSSSINKLYDII        | 1202 |
| Al_aculy02g15950.1 | 531  | QPPVPVNQQ - - QQVPLVNHHQS - - - - -                        | 550  |

## LBD
