# Supplementary material for: Genome streamlining in a minute herbivore that manipulates its host plant
Source: eLife journal article supplement (doi:10.7554/elife.56689), 2020-10-23
Supplement: supp [file elife-56689-supp-v1.zip]

— PF00105.18

|                    |     |                                                                                                     |     |
|--------------------|-----|-----------------------------------------------------------------------------------------------------|-----|
| Dm_FBpp0112948     | 102 | - K G Q N L G L L C V V C G D T S S G K H Y G I L A C N G C S G F F K R S V R R K L I Y R C Q A G T | 151 |
| Tu_tetur01g11040   | 322 | - K R P S P G L M C V V C G D T S S G K H Y G I L A C N G C S G F F K R S V R R N L M Y R C Q A G N | 371 |
| Dpte.g4383.t1      | 438 | - P T N P S N L L C V V C G D L S S G K H Y G I L A C N G C S G F F K R S V R R K L I Y R C Q A G T | 487 |
| Al_aculy02g05240.1 | 273 | S P L D A E N L T C V V C G D V S S G K H Y G I L A C N G C S G F F K R S V R R R L I Y R C Q A G T | 322 |

←

  

|                    |     |                                                                                                     |     |
|--------------------|-----|-----------------------------------------------------------------------------------------------------|-----|
| Dm_FBpp0112948     | 152 | G R C V V D K A H R N Q C Q A C R L K K C L Q M G M N K D A V Q N E R Q P R N T A T I R P E T L - - | 199 |
| Tu_tetur01g11040   | 372 | G N C I I D K Q H R N Q C Q A C R L K K C I A M G M N K Y A V Q N E R Q P R N T A T I R P E T L -   | 419 |
| Dpte.g4383.t1      | 488 | G N C I I D K Q H R N Q C Q A C R L K K C I S M G M N K D A V Q N E R Q P R N T A T I R P E V L L - | 536 |
| Al_aculy02g05240.1 | 323 | G S C V I D K K H R N Q C Q S C R L K K C I L M G M N K D A V Q N E R Q P R N T A T I R P E M L L H | 372 |

→

DBD

— PF00104.30

|                    |     |                                                                                                     |     |
|--------------------|-----|-----------------------------------------------------------------------------------------------------|-----|
| Dm_FBpp0112948     | 332 | S S S S P T M E N D N D D D S I D V T N D N E E P H A V S R S D S S F I M P Q F M S P N L Y T H Q H | 381 |
| Tu_tetur01g11040   | 488 | - - - - A L A N C N N N N S M A F V - - - Y Q P S T I - - L D S T L - - - P G L I A C H Q           | 521 |
| Dpte.g4383.t1      | 655 | M N S S D S S Q Y L G L S D L L T P S S S S S - - - - S M S S S F - - - - - I L L N P               | 689 |
| Al_aculy02g05240.1 | 453 | - - - - A I L E C V M S E Q D A G D V F H Q L D S R I - - L E A E E - - - - - N L E L E L N N       | 489 |

←

  

|                    |     |                                                                                                       |     |
|--------------------|-----|-------------------------------------------------------------------------------------------------------|-----|
| Dm_FBpp0112948     | 382 | E T V Y E T S A R L L F M A V K W A K N L P S F A R L S F R D Q V I L L E E S W S E L F L L N A I Q   | 431 |
| Tu_tetur01g11040   | 522 | E S I Y E T S A R L L F M A V K W A K N L P S F G S L T F R D Q V I L L E E S W S E L F L L C A I Q   | 571 |
| Dpte.g4383.t1      | 690 | D S F Y E I S A G L L E T G V K W I K N L P S F A S L G F R D Q I V L L E E S W S E L F I L N A I Q   | 739 |
| Al_aculy02g05240.1 | 490 | F S G V E Q M E C I A R W A V E A F E S L R D H L S L E S E E Q I S L I S N S A R G I H R L L T R A Q | 539 |

—

  

|                    |     |                                                                                                   |     |
|--------------------|-----|---------------------------------------------------------------------------------------------------|-----|
| Dm_FBpp0112948     | 432 | W C I P L D P T G G A L F S V A E H C N N L E N N A N G D T C I T K E - - - - - E L A A D V       | 472 |
| Tu_tetur01g11040   | 572 | W C L P L E N - - Q Q L F S V - - - - N S V S S S S S S S S V S P N E S N H L I S S G D R T T D L | 615 |
| Dpte.g4383.t1      | 740 | W S L P L D K - - Q S I F L S - - - - - Q N I P N G N - - - - - D Y L P E I                       | 765 |
| Al_aculy02g05240.1 | 540 | M G N S M E R - - - - - - - - - - - - - - - - - - - - - - - - - - - D L                           | 548 |

—

  

|                    |     |                                                                                                     |     |
|--------------------|-----|-----------------------------------------------------------------------------------------------------|-----|
| Dm_FBpp0112948     | 473 | R T L H E I F C K Y K A V L V D P A E F A C L K A I V L F R P - E T R G L K D P A Q I E N L Q D Q A | 521 |
| Tu_tetur01g11040   | 616 | R V L N D I F N R F K S I G V D P G E F A C L K A L S L F K P - E A R G L K D V I R I E N M Q D Q A | 664 |
| Dpte.g4383.t1      | 766 | R V L N D M F E R F R S M A I T S T E F S C L K A L A L F K P - E A R G L K D V T K I B Q M Q D Q L | 814 |
| Al_aculy02g05240.1 | 549 | K S L T D L - - - - - A S G F E A A D W I R L K L L I L L K P T E T M G A K Q V Q S L H D S R R R I | 593 |

—

  

|                    |     |                                                                                                     |     |
|--------------------|-----|-----------------------------------------------------------------------------------------------------|-----|
| Dm_FBpp0112948     | 522 | H V M L S - - - - - - Q H T K T Q - - - - - - - F T A Q I A R F G R L L L M L P L L                 | 550 |
| Tu_tetur01g11040   | 665 | Q I M L L - - - - - - Q H E K G H - - - - - - - N P A S P T R F G R L L L L L V S L                 | 693 |
| Dpte.g4383.t1      | 815 | Q S M L L - - - - - - Q Q Q Q Q Q Q M K N Q N P D T I - T T T N P I R F G K L L L L L L S L         | 855 |
| Al_aculy02g05240.1 | 594 | M A S L L T S S G S K Y T Q E S C D Q R R G K S C D V D V P N S E H S A L T R S Y K L L F A L L E L | 643 |

—

  

|                    |     |                                                                                                 |     |
|--------------------|-----|-------------------------------------------------------------------------------------------------|-----|
| Dm_FBpp0112948     | 550 | - R M I S S - - - - - - - H K I E S I Y F Q R T I G N T P M E K V - - - - - - - - - -           | 575 |
| Tu_tetur01g11040   | 693 | - R F I S A - - - - - - - D R I G A I Y F Q R T I G N T P M E K L - - - - - - - - - -           | 718 |
| Dpte.g4383.t1      | 855 | - K T I P A - - - - - - - E K I A S I Y F K K A I G S K Y F D N N - - - - - - - - - -           | 880 |
| Al_aculy02g05240.1 | 644 | D R L V L A N S N S F E A Q D G E E V G V G I R S K S W D Q T A D G E L D L D L A G Q S E D N R | 693 |

→

LBD
