# Supplementary material for: Genome streamlining in a minute herbivore that manipulates its host plant
Source: eLife journal article supplement (doi:10.7554/elife.56689), 2020-10-23
Supplement: supp [file elife-56689-supp-v1.zip]

## PF00105.18

|                    |      |   |   |   |   |   |   |   |   |   |   |   |   |   |   |   |   |   |   |   |   |   |   |   |   |   |   |   |   |   |   |   |   |   |   |   |   |   |   |   |   |   |   |   |   |   |   |   |   |   |      |
|--------------------|------|---|---|---|---|---|---|---|---|---|---|---|---|---|---|---|---|---|---|---|---|---|---|---|---|---|---|---|---|---|---|---|---|---|---|---|---|---|---|---|---|---|---|---|---|---|---|---|---|---|------|
| Dm_FBpp0305536     | 1243 | L | V | C | M | I | C | E | D | K | A | T | G | L | H | Y | G | I | I | T | C | E | G | C | K | G | F | F | K | R | T | V | Q | N | R | R | V | T | C | V | A | D | G | T | C | E | I | T | K | A | 1292 |
| Tu_tetur07g00140   | 375  | M | K | C | M | I | C | D | D | K | A | T | G | L | H | Y | G | I | I | T | C | E | G | C | K | G | F | F | K | R | T | V | Q | N | K | R | V | V | C | V | A | E | G | Q | C | A | I | T | K | Q | 424  |
| Al_aculy03g08180.1 | 444  | Q | I | C | M | I | C | E | D | K | A | T | G | L | H | Y | G | I | I | T | C | E | G | C | K | G | F | F | K | R | T | V | Q | N | K | R | V | S | C | I | A | D | K | N | C | V | I | T | K | Q | 493  |

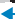

|                    |      |   |   |   |   |   |   |   |   |   |   |   |   |   |   |   |   |   |   |   |   |   |   |   |   |   |   |   |   |   |   |   |   |   |   |   |   |   |   |   |   |   |   |   |   |   |   |   |   |   |      |
|--------------------|------|---|---|---|---|---|---|---|---|---|---|---|---|---|---|---|---|---|---|---|---|---|---|---|---|---|---|---|---|---|---|---|---|---|---|---|---|---|---|---|---|---|---|---|---|---|---|---|---|---|------|
| Dm_FBpp0305536     | 1293 | Q | R | N | R | C | Q | Y | C | R | F | K | K | C | I | E | Q | G | M | V | L | Q | A | V | R | E | D | R | M | P | G | G | R | N | S | G | A | V | Y | N | L | Y | K | V | K | Y | K | K | H | K | 1342 |
| Tu_tetur07g00140   | 425  | Q | R | N | R | C | Q | Y | C | R | F | Q | K | C | L | R | Q | G | M | V | L | A | A | V | R | E | D | R | M | P | G | G | R | N | S | G | A | V | Y | N | L | Y | K | V | K | Y | K | K | H | K | 474  |
| Al_aculy03g08180.1 | 494  | Q | R | N | R | C | Q | S | C | R | F | D | K | C | I | R | Q | G | M | V | L | A | A | V | R | E | D | R | M | P | G | G | R | N | S | G | A | V | Y | N | M | Y | K | V | K | Y | K | K | H | K | 543  |

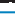

## DBD

## PF00104.30

|                    |      |   |   |   |   |   |   |   |   |   |   |   |   |   |   |   |   |   |   |   |   |   |   |   |   |   |   |   |   |   |   |   |   |   |   |   |   |   |   |   |   |   |   |   |   |   |   |   |     |   |     |      |
|--------------------|------|---|---|---|---|---|---|---|---|---|---|---|---|---|---|---|---|---|---|---|---|---|---|---|---|---|---|---|---|---|---|---|---|---|---|---|---|---|---|---|---|---|---|---|---|---|---|---|-----|---|-----|------|
| Dm_FBpp0305536     | 1705 | D | D | P | E | F | V | S | E | V | N | S | H | L | S | T | L | Q | T | C | L | T | T | L | M | G | Q | P | - | - | - | - | - | - | - | I | A | M | E | Q | L | K | - | L | D | V | G | H | M   | V | D   | 1746 |
| Tu_tetur07g00140   | 911  | S | D | E | E | L | Q | R | E | M | R | L | S | M | Q | K | L | I | N | C | L | D | K | I | V | Q | R | R | T | R | E | E | D | N | L | T | L | D | S | L | E | - | K | E | S | R | L | L | I   | E | 959 |      |
| Al_aculy03g08180.1 | 770  | T | S | N | S | P | V | S | S | A | P | C | S | T | S | T | T | P | T | T | N | S | A | G | Q | G | - | - | - | - | - | - | - | - | - | - | - | - | - | - | - | - | - | - | - | - | - | - | 795 |   |     |      |

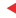

|                    |      |   |   |   |   |   |   |   |   |   |   |   |   |   |   |   |   |   |   |   |   |   |   |   |   |   |   |   |   |   |   |   |   |   |   |   |   |   |   |   |   |   |   |   |   |     |   |   |   |      |      |
|--------------------|------|---|---|---|---|---|---|---|---|---|---|---|---|---|---|---|---|---|---|---|---|---|---|---|---|---|---|---|---|---|---|---|---|---|---|---|---|---|---|---|---|---|---|---|---|-----|---|---|---|------|------|
| Dm_FBpp0305536     | 1747 | K | M | T | Q | I | T | I | M | F | R | R | I | K | L | K | M | E | E | Y | V | C | L | K | V | Y | I | - | - | - | - | - | - | - | - | - | - | - | - | - | - | - | - | - | - | -   | - | - | - | 1781 |      |
| Tu_tetur07g00140   | 960  | Y | L | C | K | V | K | L | Y | L | K | S | I | N | L | K | M | E | E | Y | V | L | L | K | V | I | I | M | T | M | T | S | E | K | R | Q | E | L | L | S | E | R | E | A | A | G   | L | D | I | I    | 1009 |
| Al_aculy03g08180.1 | 795  | - | - | - | - | - | - | - | - | - | - | - | - | - | - | - | - | - | - | - | - | - | - | - | - | - | - | - | - | - | - | - | - | - | - | - | - | - | - | - | - | - | - | - | - | 795 |   |   |   |      |      |

|                    |      |   |   |   |   |   |   |   |   |   |   |   |   |   |   |   |   |   |   |   |   |   |   |   |   |   |   |   |   |   |   |   |   |   |   |   |   |   |   |   |   |   |   |   |   |   |     |   |   |      |      |
|--------------------|------|---|---|---|---|---|---|---|---|---|---|---|---|---|---|---|---|---|---|---|---|---|---|---|---|---|---|---|---|---|---|---|---|---|---|---|---|---|---|---|---|---|---|---|---|---|-----|---|---|------|------|
| Dm_FBpp0305536     | 1782 | E | S | I | Q | - | - | - | - | - | E | R | Y | V | Q | V | L | R | S | Y | L | Q | N | S | S | P | Q | N | P | Q | A | R | L | S | E | L | L | S | H | I | P | E | I | Q | A | A | A   | S | L | L    | 1825 |
| Tu_tetur07g00140   | 1010 | E | R | I | N | - | - | - | - | - | C | K | Y | L | N | V | L | S | C | Y | - | - | - | S | S | P | - | - | - | S | R | Y | K | M | I | L | R | S | I | H | L | I | E | K | C | A | T   | I | L | 1046 |      |
| Al_aculy03g08180.1 | 795  | - | - | - | - | - | - | - | - | - | - | - | - | - | - | - | - | - | - | - | - | - | - | - | - | - | - | - | - | - | - | - | - | - | - | - | - | - | - | - | - | - | - | - | - | - | 824 |   |   |      |      |

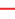

## LBD
