# Supplementary material for: Genome streamlining in a minute herbivore that manipulates its host plant
Source: eLife journal article supplement (doi:10.7554/elife.56689), 2020-10-23
Supplement: supp [file elife-56689-supp-v1.zip]

## — PF00105.18

|                    |     |                                 |                   |                  |                                                                                    |     |
|--------------------|-----|---------------------------------|-------------------|------------------|------------------------------------------------------------------------------------|-----|
| Dm_FBpp0074915     | 200 | AVVPADSRPQTPEYIKSYPVMDTTVASSVKG | EPELN             | IEFDGTTVLCRVCG   | 249                                                                                |     |
| Tu_tetur19g00650   | 23  | -----                           | SSFKDSELK         | IEFDGTTVLCRVCG   | 46                                                                                 |     |
| Dpte.g6820.t1      | 82  | -----                           | DRCKDLDLK         | IEFDGTTVLCRVCG   | 105                                                                                |     |
| Al_aculy01g02260.1 | 41  | -----                           | -----             | IEFDGSAILCQVCG   | 55                                                                                 |     |
|                    |     |                                 |                   |                  |  |     |
| Dm_FBpp0074915     | 250 | DKASGFHYGVHSCGCKGFFRRS          | IQQKIQYRPCTKNQQCS | ILRINNRRCQ       | 299                                                                                |     |
| Tu_tetur19g00650   | 47  | DASGFHYGVHSCGCKGFFRRS           | IQQKIQYRPCTKNQQCS | ILRINNRRCQ       | 96                                                                                 |     |
| Dpte.g6820.t1      | 106 | DKASGFHYGVHSCGCKGFFRRS          | IQQKIQYRPCTKNQQCS | ILRINNRRCQ       | 155                                                                                |     |
| Al_aculy01g02260.1 | 56  | DKASGFHYGVHSCGCKGFFRRS          | IQQKIQYRPSKNQQCP  | IMRVNNRRCQ       | 105                                                                                |     |
|                    |     |                                 |                   |                  |   |     |
| Dm_FBpp0074915     | 300 | YCRLKKCI                        | AVGMSRD           | -----            | 314                                                                                |     |
| Tu_tetur19g00650   | 97  | YCRLKKCI                        | AVGMSRD           | -----            | 111                                                                                |     |
| Dpte.g6820.t1      | 156 | YCRLKKCI                        | AVGMSRDE          | FTFLSLVLSQKEKSNI | IREKKT                                                                             | 205 |
| Al_aculy01g02260.1 | 106 | YCRLKKCI                        | AVGMSRD           | -----            | 120                                                                                |     |
|                    |     |                                 |                   |                  |   |     |

## DBD

## — PF00104.30

|                                                                                     |     |                                                     |     |
|-------------------------------------------------------------------------------------|-----|-----------------------------------------------------|-----|
| Dm_FBpp0074915                                                                      | 388 | YSMPTLLACPLNPAPELQS-----EQEFSORFAHVIIRGVIDFAGM      | 427 |
| Tu_tetur19g00650                                                                    | 184 | YARCPSTMACPLNPLPP-NGIENGPGEGILENFSERFSPAIRGVVEFAKR  | 232 |
| Dpte.g6820.t1                                                                       | 599 | YAQCQPQ-MTCLNPLPAQNQIDSNR---LMEDFSERFSPAIRGVVEFAKR  | 644 |
| Al_aculy01g02260.1                                                                  | 184 | -----HSLSGGGGGG-----                                | 194 |
|   |     |                                                     |     |
| Dm_FBpp0074915                                                                      | 428 | IPGFQLLTQDDKFTLLKAGLFDALFVRLICMFDSSINSIICLNGQVMRRD  | 477 |
| Tu_tetur19g00650                                                                    | 233 | IPGFAYLSQDDQVFTLLKAGVFEVLLVRLACMFDKTSNSMICLNGMVLKRE | 282 |
| Dpte.g6820.t1                                                                       | 645 | IPGFSLLAQEDQVFTLLKAGVFEVLLVRLACMFDSTNSMICLNGLSLRD   | 694 |
| Al_aculy01g02260.1                                                                  | 194 | -AGGASVTASTQM-----ETTTDQMNQLQDNQTNDE                | 224 |
|    |     |                                                     |     |
| Dm_FBpp0074915                                                                      | 478 | AIQ-----NGANA                                       | 485 |
| Tu_tetur19g00650                                                                    | 283 | SLH-----SQSSA                                       | 290 |
| Dpte.g6820.t1                                                                       | 695 | SLH-----SASNA                                       | 702 |
| Al_aculy01g02260.1                                                                  | 225 | NHHYHQHHHQEQQKLKSALMRHHQHQHQQQQQRERERELELELEEQNQ    | 274 |
|    |     |                                                     |     |
| Dm_FBpp0074915                                                                      | 486 | RFLVDSTFNFAERMNSMNLTDAEIGLFCALVLIPTDRPGLRNLELIEKMY  | 535 |
| Tu_tetur19g00650                                                                    | 291 | RFLLDSMFGFAEMLNALNLTDHEIALFCALVLIPTDRPGLRNIDLIGKIN  | 340 |
| Dpte.g6820.t1                                                                       | 703 | RFLLDSMFEFAERLNSLRLTDNELGLFCALVVLIPTDRPGLRNIDLVQKIN | 752 |
| Al_aculy01g02260.1                                                                  | 275 | R-----EHLNQLQLNDSLEALLCSSVVVATDQAGLKNAELVGKIS       | 314 |
|  |     |                                                     |     |
| Dm_FBpp0074915                                                                      | 536 | SRLKGCQLQY--IVAQNRPDQ-----PE-----                   | 555 |
| Tu_tetur19g00650                                                                    | 341 | RKLVDLLDK--LVTSNHSDN-----PG-----                    | 360 |
| Dpte.g6820.t1                                                                       | 753 | KRLLEEILQK--AIATNHHQQNLSTTES---AVAAAAQAANQ-----     | 788 |
| Al_aculy01g02260.1                                                                  | 315 | EKLQSLNRRNAVNTDNTNNNNISSIQANQRQEVSNPAINLNQQQQRHQH   | 364 |
|  |     |                                                     |     |
| Dm_FBpp0074915                                                                      | 555 | -----FLAKLLETMPDLRTLSTLHTEKLVVFRTEHKELLRQQMWS--     | 595 |
| Tu_tetur19g00650                                                                    | 360 | -----LFSSLVNKIPDLRTLNTLHSEKLLAYKMG-----             | 389 |
| Dpte.g6820.t1                                                                       | 788 | -----LFQELIRKIPDLRTLNALHSDKLGLGKSFGGLEQPQQSMNSA     | 830 |
| Al_aculy01g02260.1                                                                  | 365 | QPEQKDELLLAELMRKVPELR-----RERLIAALAEERDSILAAD----   | 403 |
|  |     |                                                     |     |

## LBD
