# Supplementary material for: Genome streamlining in a minute herbivore that manipulates its host plant
Source: eLife journal article supplement (doi:10.7554/elife.56689), 2020-10-23

a

## scaffold1

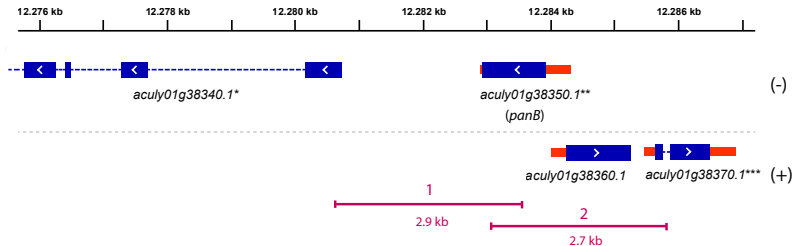

\*cl20213 (Bilateria), \*\* cd06557 (cellular organisms),\*\*\* cl21494 (?)

## scaffold4

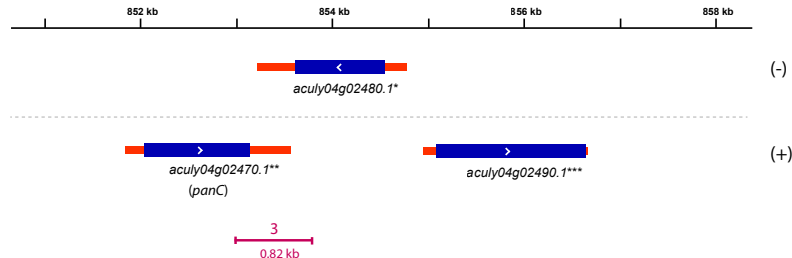

\*cd11384 (eukaryota), \*\* cd00560 (cellular organisms),\*\*\*cl33807 (cellular organisms)

b

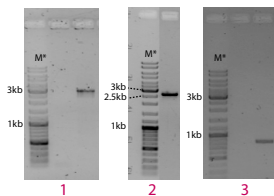

c

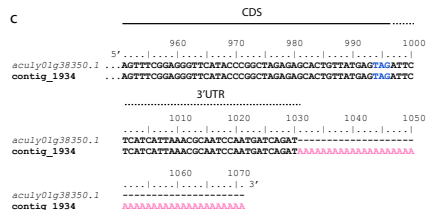

Supplement: supp [file elife-56689-supp-v1.zip]
