# Supplementary material for: Genome streamlining in a minute herbivore that manipulates its host plant
Source: eLife journal article supplement (doi:10.7554/elife.56689), 2020-10-23
Supplement: supp [file elife-56689-supp-v1.zip]

## PF00105.18

|                  |     |                                                                                                         |     |
|------------------|-----|---------------------------------------------------------------------------------------------------------|-----|
| Dm_FBpp0082036   | 187 | - - - - - S G S Q I D S K Q N I E C V V C G D K                                                         | 206 |
| Tu_tetur04g01460 | 52  | - - - - - N G Q S I E C V V C S D K                                                                     | 65  |
| Dpte.g6159.t1    | 445 | N R V N L H Q R N M A T M N S Q Q Q P Q G S T N C V T T V S A S S T T N N N Q I S I E C V V C G D K     | 494 |
| Al_aculy03g10030 | 99  | L D V D L - - - - - G S P Q G - - - - S Q S G G S Q T S I E C V V C G D K                               | 126 |
|                  |     |                                                                                                         |     |
| Dm_FBpp0082036   | 207 | S S G K H Y G Q F T C E G C K S F F F K R S V R R N L T Y S C R G S R N C P I D Q H H R N Q C C Q Y C R | 256 |
| Tu_tetur04g01460 | 66  | S S G K H Y G Q F T C E G C K S F F F K R S V R R N L T Y T C R G S R N C P I D Q H H R N Q C C Q Y C R | 115 |
| Dpte.g6159.t1    | 495 | S S G K H Y G Q F T C E G C K S F F F K R S V R R N L T Y S C R G N R N C P V D Q H H R N Q C C Q Y C R | 544 |
| Al_aculy03g10030 | 127 | S S G K H Y G Q F T C E G C K S F F F K R S V R R N L T Y S C R A N K S C P I D Q H H R N Q C C H C R   | 176 |
|                  |     |                                                                                                         |     |
| Dm_FBpp0082036   | 257 | L K K C L K M G M R R E - - - - -                                                                       | 268 |
| Tu_tetur04g01460 | 116 | L K K C L K M G M R R E - - - - -                                                                       | 127 |
| Dpte.g6159.t1    | 545 | L R K C L K M G M R R E V L S I I S S Q K K M S I E I L L S D E P F I K A R D R C R S V S S A N Q T     | 594 |
| Al_aculy03g10030 | 177 | L R K C L K M G M R R E - - - - -                                                                       | 188 |

## DBD

## PF00104.30

|                  |      |           |          |         |                |        |             |          |       |          |         |           |                   |       |        |       |      |
|------------------|------|-----------|----------|---------|----------------|--------|-------------|----------|-------|----------|---------|-----------|-------------------|-------|--------|-------|------|
| Dm_FBpp0082036   | 308  | LSSISL    | LLLR     | RAE     | -PYPT          | SRYG   | QCMQP       | -        | -     | NNIMG    | ITDNT   | CELA      | ARLL              | LFS   | SAV    | 353   |      |
| Tu_tetur04g01460 | 161  | SQSFI     | SLLLR    | RAE     | -TYPT          | QT     | IQNMHP      | -        | -     | SNIMT    | ITEG    | INELA     | ASIL              | LFAA  | L      | 206   |      |
| Dpte.g6159.t1    | 1045 | LQGYV     | SLL      | QQ      | AAES           | TVRL   | TQT         | MQQL     | HSTST | NGLLS    | IT      | ETMC      | EM                | LAAR  | ILFAA  | 1094  |      |
| Al_aculy03g10030 | 207  | LAA       | -        | -       | -              | -      | AA          | -        | AAASA | Q        | -       | -         | -                 | HP    | -      | 240   |      |
|                  |      |           |          |         |                |        |             |          |       |          |         |           |                   |       |        |       |      |
| Dm_FBpp0082036   | 354  | EWAKN     | I        | PFFPE   | LQV            | T      | DQVALL      | RL       | VWSE  | LFV      | LNASQCS | MP        | LHV               | AP    | LLAAAG | 403   |      |
| Tu_tetur04g01460 | 207  | DWARN     | I        | PFFPD   | LQV            | T      | DQVALL      | RL       | VWSE  | LFV      | LNASQCS | MTVN      | I                 | AP    | LLAAQS | 256   |      |
| Dpte.g6159.t1    | 1095 | DWARK     | I        | PHFPD   | LQVQ           | DQV    | SLLRM       | VWSE     | LF    | I        | LNASQCS | MP        | MHT               | AH    | LLAAAG | 1144  |      |
| Al_aculy03g10030 | 240  | -         | -        | -       | -              | -      | MQQN        | PML      | AQHP  | AAAGMFAH | LSAMHP  | ALRG      | HPMAL             | MA    | AAA    | 279   |      |
|                  |      |           |          |         |                |        |             |          |       |          |         |           |                   |       |        |       |      |
| Dm_FBpp0082036   | 404  | LHAS      | -        | PMAADR  | V              | AFMDH  | IRIFQ       | EQVEKLKA | -     | -        | -       | -         | LHVD              | SAEYS | SCLKAI | 447   |      |
| Tu_tetur04g01460 | 257  | VHSST     | P        | FAADR   | V              | ITFMDN | IRIFQ       | EQVEKLKS | -     | -        | -       | -         | LHVD              | PAEYS | SCLKAI | 301   |      |
| Dpte.g6159.t1    | 1145 | LHAN      | -        | PMAADR  | V              | AFMDH  | IRIFQ       | DNLEKLKA | -     | -        | -       | -         | LQVD              | AAEYS | SCLKAI | 1188  |      |
| Al_aculy03g10030 | 280  | LHQ       | -        | -       | -              | -      | QQQ         | QQQAR    | Q     | PQPNL    | VQRD    | PQPQPTQVP | I                 |       |        | 311   |      |
|                  |      |           |          |         |                |        |             |          |       |          |         |           |                   |       |        |       |      |
| Dm_FBpp0082036   | 448  | VLFT      | TDACGL   | SDV     | -              | -      | -           | -        | -     | -        | -       | -         | THIE              | -     | -      | SLQEK | 469  |
| Tu_tetur04g01460 | 302  | VLFT      | TDACGL   | TDV     | -              | -      | -           | -        | -     | -        | -       | -         | QKIE              | -     | -      | AHQEA | 323  |
| Dpte.g6159.t1    | 1189 | VLFT      | TDACGL   | QDG     | -              | -      | -           | -        | -     | -        | -       | -         | GHIE              | -     | -      | SLQEK | 1210 |
| Al_aculy03g10030 | 312  | ANHAAAGN  | GLRG     | V       | GDGASVGVNRSPPV | I      | PASGQLDPQPT | HL       | LQPP  | SNSE     | EQ      |           |                   |       |        | 361   |      |
|                  |      |           |          |         |                |        |             |          |       |          |         |           |                   |       |        |       |      |
| Dm_FBpp0082036   | 470  | SQCA      | LEEYCR   | TYPNQPT | IRFGKLLRLP     | SLRTVS | -           | -        | -     | -        | -       | -         | SQVIE             | QLFFV |        | 513   |      |
| Tu_tetur04g01460 | 324  | SQCA      | LEEYCR   | TYPNQPT | IRFGKLLRLP     | SLRAIS | -           | -        | -     | -        | -       | -         | SQVIE             | QLFFV |        | 367   |      |
| Dpte.g6159.t1    | 1211 | SQCA      | LEEYCR   | TYPNQPT | IRFGKLLRLP     | SLRSVS | -           | -        | -     | -        | -       | -         | SHVIE             | QLFFV |        | 1254  |      |
| Al_aculy03g10030 | 362  | QQAQHLANL | QQQLHHQ  | -       | -              | -      | -           | -        | -     | LQLAA    | IAAA    | AQHNNQQQ  | QQQQQ             | QFHQ  |        | 403   |      |
|                  |      |           |          |         |                |        |             |          |       |          |         |           |                   |       |        |       |      |
| Dm_FBpp0082036   | 514  | RL        | -        | -       | -              | -      | -           | -        | VGK   | APIET    | LIRDM   | LL        | -                 | -     | -      | 530   |      |
| Tu_tetur04g01460 | 368  | RL        | -        | -       | -              | -      | -           | -        | VGK   | APIET    | QLIRN   | LLI       | -                 | -     | -      | 384   |      |
| Dpte.g6159.t1    | 1255 | RL        | -        | -       | -              | -      | -           | -        | VGK   | APIET    | LIRDM   | LVSE      | HFKLTKMTNYHTESHKD |       |        | 1290  |      |
| Al_aculy03g10030 | 404  | HLNHHQLN  | MNMNMSLN | LNQANQ  | EYQ            | IND    | LIN         | -        |       |          |         |           |                   |       |        | 434   |      |

## LBD
