# Supplementary material for: Genome streamlining in a minute herbivore that manipulates its host plant
Source: eLife. 2020 Oct 23;9:e56689. doi: 10.7554/eLife.56689 (PMC7738191; doi:10.7554/eLife.56689)
Supplement: Supplementary file 1. [file elife-56689-supp1.xlsx]

## Sheet: Table_S1
Click on tabs at bottom to view each of Table S1-20.
Table S1. Contribution of different classes/families of TEs to the A. lycopersici genome. The size of the assembly used for calculating the percentage of the genome is 32,060,547 bp excluding Ns.
TE class/family	Amount of DNA masked (bp)*	Amount of DNA masked (%)
DNA/TcMar-Mariner	5550	0.017311
DNA/TcMar-Tc1	29777	0.0928774
DNA/TcMar	41110	0.128226
DNA/TcMar-Tc4	9472	0.0295441
DNA/Mutatorlike	4195	0.0130846
DNA/hAT	53348	0.166398
DNA/unclassified	53604	0.167196
DNA/Helitron	28592	0.0891813
LTR/Copia	142236	0.443648
LTR/Gypsy	70017	0.21839
LTR/unclassified	46736	0.145774
non-LTR/TRAS-like	8351	0.0260476
TE/unclassified	113429	0.353796
simple_repeat	75077	0.234173
*corresponds to net amount of DNA masked by the Repeatmasker after removing the overlap or double masking

## Sheet: Table_S2
Click on tabs at bottom to view each of Table S1-20.
Table S2. Repeatmasker output for the A. lycopersici genome
SW score	perc	perc	perc	query sequence	position in query				matching repeat	repeat class/family	position in repeat
	div.	del.	ins.		begin	end	(left)				begin	end	(left)	ID
78647	0	0	0	scaffold00001	836	9186	-12429341	C	TRAS-1	non-LTR/TRAS-like	0	8351	1	1
244	28.6	2.1	9	scaffold00001	10567	10708	-12427819	C	R=11	DNA/hAT	-4052	666	534	2
895	12	0	0	scaffold00001	19487	19619	-12418908	+	Contig10_fl_Contig13	DNA/TcMar-Mariner	1156	1288	0	3
50760	0	0	0	scaffold00001	27908	33382	-12405145	+	Contig23fr	LTR/Gypsy	1	5475	0	4
253	4.8	1.6	0	scaffold00001	61774	61836	-12376691	+	Contig1	simple_repeat	54	117	-240	5
482	15.2	0	0	scaffold00001	105486	105564	-12332963	C	R=183	TE/TE_unclass	-4	79	1	6
362	35.5	1.9	1.9	scaffold00001	108585	108903	-12329624	C	R=69	TE/TE_unclass	-296	418	100	7
1554	20.3	17.7	0.8	scaffold00001	149394	149840	-12288687	C	R=10	DNA/hAT	0	522	1	8
550	10.8	4.3	0	scaffold00001	160983	161075	-12277452	+	R=8	DNA/TcMar	1	97	-123	9
238	8	6	0	scaffold00001	161075	161124	-12277403	+	R=109_contig5	DNA/hAT	249	301	-55	10		*
398	6.8	2.1	23.8	scaffold00001	161334	161430	-12277097	+	R=183	TE/TE_unclass	3	82	-1	11
390	10.2	0	0	scaffold00001	161432	161490	-12277037	+	R=109_contig5	DNA/hAT	298	356	0	12
296	28.1	2.2	0	scaffold00001	242515	242603	-12195924	C	R=193	TE/TE_unclass	-9	93	3	13
389	2.2	0	0	scaffold00001	265771	265816	-12172711	+	R=120	TE/TE_unclass	157	202	0	14
408	0	0	0	scaffold00001	266966	267011	-12171516	C	R=120	TE/TE_unclass	0	202	157	15
562	5.3	4.4	6.4	scaffold00001	343883	344042	-12094485	+	Contig1	simple_repeat	135	291	-66	16
955	3.5	3.5	1.7	scaffold00001	361732	361904	-12076623	C	Contig1	simple_repeat	-39	318	143	17
786	17.9	1.8	0.6	scaffold00001	414103	414271	-12024256	+	Contig2	LTR/LTR_unclass	7	177	-19	18
502	24.6	0.7	0.7	scaffold00001	419483	419517	-12019010	C	R=38	DNA/DNA_unclass	-3	135	4	19
632	13.4	0	0	scaffold00001	419518	419614	-12018913	C	R=30	DNA/TcMar	0	97	1	20
742	9.4	1.2	10.5	scaffold00001	469752	469994	-11968533	+	Contig1	simple_repeat	16	220	-137	21
504	20.1	3.8	2	scaffold00001	504692	504876	-11933651	+	R=11	DNA/hAT	485	689	-4029	22
385	0.8	0	2.6	scaffold00001	520499	520618	-11917909	+	Contig1	simple_repeat	219	335	-22	23
299	11.1	0	0	scaffold00001	523200	523244	-11915283	C	Contig10_fl_Contig13	DNA/TcMar-Mariner	0	1288	1244	24		*
615	9.8	0	0	scaffold00001	523243	523334	-11915193	C	Contig10_fl_Contig13	DNA/TcMar-Mariner	-1196	92	1	25
383	37.8	0	0.9	scaffold00001	563133	563351	-11875176	C	R=2	TE/TE_unclass	-164	769	553	26		*
452	35.2	0.4	1.5	scaffold00001	563298	563574	-11874953	+	R=2	TE/TE_unclass	431	704	-229	27
226	33	0	0	scaffold00001	563721	563811	-11874716	+	R=2	TE/TE_unclass	841	931	-2	27
229	20	0	1.8	scaffold00001	581460	581515	-11857012	+	R=132_R=153	LTR/LTR_unclass	366	420	-55	28
626	14.1	0.9	6.4	scaffold00001	605677	605889	-11832638	C	Contig1	simple_repeat	-42	315	114	29
737	4.7	5.1	2.8	scaffold00001	619690	619864	-11818663	+	Contig1	simple_repeat	22	200	-157	30
1639	2.5	0	0	scaffold00001	643302	643497	-11795030	+	Contig2	LTR/LTR_unclass	1	196	0	31
1639	2.5	0	0	scaffold00001	645894	646089	-11792438	+	Contig2	LTR/LTR_unclass	1	196	0	32
229	12.2	0	0	scaffold00001	654042	654082	-11784445	+	R=11	DNA/hAT	556	596	-4122	33
308	22	1.2	2.4	scaffold00001	679030	679113	-11759414	+	R=44	TE/TE_unclass	1	83	-164	34
493	25.4	4.5	3.3	scaffold00001	679240	679418	-11759109	+	R=29	DNA/DNA_unclass	5	185	-179	35
246	21.1	0.7	2.9	scaffold00001	754806	754899	-11683628	C	R=132_R=153	LTR/LTR_unclass	-29	446	346	36
465	0.6	13	1.5	scaffold00001	772789	772965	-11665562	+	Contig1	simple_repeat	114	310	-47	37
264	22.8	14.2	0.8	scaffold00001	783112	783217	-11655310	C	Contig17	RC/Helitron	-362	120	1	38
1122	8.8	9.9	0	scaffold00001	854509	854679	-11583848	+	R=191	LTR/Copia	1	188	-4412	39
388	17.1	1	5.3	scaffold00001	858681	858779	-11579748	+	R=132_R=153	LTR/LTR_unclass	343	437	-38	40
1142	2.1	3.2	0.5	scaffold00001	877767	877953	-11560574	C	Contig1	simple_repeat	-34	323	132	41
594	19.6	1.2	18.7	scaffold00001	892769	893025	-11545502	+	R=8	DNA/TcMar	1	219	-1	42
1139	8.8	0	4.1	scaffold00001	918187	918364	-11520163	C	Contig15_fr	DNA/TcMar-Tc1	0	501	331	43
975	6	0	0	scaffold00001	918376	918509	-11520018	+	R=14	DNA/TcMar	118	251	-2	44
260	19.3	0	0	scaffold00001	981150	981206	-11457321	C	R=132_R=153	LTR/LTR_unclass	-61	414	358	45
743	1.8	7.5	1.6	scaffold00001	985677	985849	-11452678	C	Contig1	simple_repeat	-40	317	135	46
1161	4.3	0.6	0.6	scaffold00001	1024794	1024958	-11413569	+	Contig1	simple_repeat	29	193	-164	47
287	9	0	0	scaffold00001	1024981	1025058	-11413469	+	Contig1	simple_repeat	1	78	-279	48
300	23.2	0	2.6	scaffold00001	1055997	1056151	-11382376	+	R=11	DNA/hAT	525	675	-4043	49
571	19.8	0.8	1.6	scaffold00001	1072552	1072674	-11365853	C	R=8	DNA/TcMar	-98	122	1	50
291	26.3	10.4	4.1	scaffold00001	1085004	1085118	-11353409	+	R=44	TE/TE_unclass	35	156	-91	51
641	14.7	0	0	scaffold00001	1109709	1109810	-11328717	+	R=193	TE/TE_unclass	1	102	0	52
680	2.2	4.9	3.2	scaffold00001	1117202	1117386	-11321141	+	Contig1	simple_repeat	157	344	-13	53
478	30.4	1.6	1.6	scaffold00001	1124395	1124581	-11313946	C	R=2	TE/TE_unclass	-194	739	553	54		*
781	29.9	1.5	2.1	scaffold00001	1124536	1124863	-11313664	+	R=2	TE/TE_unclass	437	762	-171	55
815	10.3	14.7	0	scaffold00001	1136776	1136911	-11301616	C	R=68	LTR/LTR_unclass	0	156	1	56
890	4.9	0.6	3.7	scaffold00001	1194863	1195031	-11243496	C	Contig1	simple_repeat	-62	295	132	57
375	24	1	0	scaffold00001	1200761	1200856	-11237671	+	Contig21	DNA/TcMar-Tc1	1	97	-1301	58
367	31.7	0.5	5.6	scaffold00001	1200777	1200963	-11237564	+	R=45	DNA/DNA_unclass	18	195	-15	59		*
317	25.9	0	1.1	scaffold00001	1200889	1200978	-11237549	+	Contig21	DNA/TcMar-Tc1	1310	1398	0	60		*
905	18.1	0	4.2	scaffold00001	1220862	1221034	-11217493	C	R=11	DNA/hAT	-4030	688	523	61
294	14.5	0.7	0.7	scaffold00001	1308845	1308990	-11129537	+	Contig1	simple_repeat	212	357	0	62
598	27.6	3.4	2.4	scaffold00001	1311159	1311366	-11127161	C	R=2	TE/TE_unclass	-217	716	507	63		*
700	31.1	0.4	0.8	scaffold00001	1311336	1311601	-11126926	+	R=2	TE/TE_unclass	496	760	-173	64
14020	0	0	0	scaffold00001	1342005	1343490	-11095037	+	R=236_fl_R=279_R-234_R=130	DNA/TcMar	1	1486	0	65
493	11.4	1.4	11.1	scaffold00001	1353310	1353457	-11085070	+	Contig1	simple_repeat	65	199	-158	66
323	25	3.3	0	scaffold00001	1404712	1404803	-11033724	+	R=7	DNA/DNA_unclass	5	99	-278	67
299	24.2	8.2	7.1	scaffold00001	1404804	1404901	-11033626	C	R=314_contig27_R=228_R=177_R=37	DNA/hAT	-719	99	1	68		*
12095	0	0	0.2	scaffold00001	1404900	1406190	-11032337	+	Contig10_fl_Contig13	DNA/TcMar-Mariner	1	1288	0	69
665	12.4	0	0	scaffold00001	1409943	1410039	-11028488	+	R=30	DNA/TcMar	1	97	0	70
513	24.3	0.7	1.5	scaffold00001	1410040	1410077	-11028450	+	R=38	DNA/DNA_unclass	4	137	-1	71
627	29.5	4	4.7	scaffold00001	1440324	1440647	-10997880	C	R=2	TE/TE_unclass	-178	755	434	72		*
790	31.2	0.9	1.2	scaffold00001	1440481	1440804	-10997723	+	R=2	TE/TE_unclass	437	759	-174	72
618	29	4.2	4.9	scaffold00001	1453536	1453843	-10984684	C	R=2	TE/TE_unclass	-194	739	434	73		*
768	28.2	0.8	1.1	scaffold00001	1453736	1454000	-10984527	+	R=2	TE/TE_unclass	496	759	-174	74
539	3.7	9.5	0.5	scaffold00001	1472668	1472856	-10965671	+	Contig1	simple_repeat	137	342	-15	75
573	0	0	0	scaffold00001	1566003	1566141	-10872386	+	Contig1	simple_repeat	219	357	0	76
957	11.2	5.6	0.7	scaffold00001	1593606	1593742	-10844785	+	Contig30	LTR/Copia	1	144	-2357	77
12463	0.3	0	0.1	scaffold00001	1593743	1595075	-10843452	+	R=52	DNA/TcMar-Tc1	1	1332	0	78
432	13	3.3	6.8	scaffold00001	1595076	1595159	-10843368	+	Contig30	LTR/Copia	147	227	-2274	77
427	14.3	0	1.4	scaffold00001	1599616	1599686	-10838841	C	R=77	LTR/LTR_unclass	-117	72	3	79
1240	12.5	0.4	7.6	scaffold00001	1600668	1600892	-10837635	+	R=45	DNA/DNA_unclass	1	210	0	80
406	11.6	2.9	0	scaffold00001	1627012	1627080	-10811447	C	R=40	TE/TE_unclass	0	71	1	81
241	21.2	3	0	scaffold00001	1627056	1627121	-10811406	+	R=40	TE/TE_unclass	1	68	-3	82		*
1190	13.6	4.8	0	scaffold00001	1682228	1682433	-10756094	C	R=14	DNA/TcMar	0	253	38	83
414	21.1	0	0	scaffold00001	1682577	1682647	-10755880	C	R=236_fl_R=279_R-234_R=130	DNA/TcMar	-1238	248	178	84
537	13.3	0	0	scaffold00001	1682658	1682732	-10755795	C	R=236_fl_R=279_R-234_R=130	DNA/TcMar	-1411	75	1	84
1270	18.2	0	0	scaffold00001	1691173	1691392	-10747135	+	R=8	DNA/TcMar	1	220	0	85
776	0	0	0	scaffold00001	1750527	1750614	-10687913	C	Contig10_fl_Contig13	DNA/TcMar-Mariner	-1181	107	20	86
3010	2.5	2.5	0	scaffold00001	1762224	1762588	-10675939	+	R=7	DNA/DNA_unclass	1	374	-3	87
375	0	0	0.7	scaffold00001	1775404	1775540	-10662987	C	Contig1	simple_repeat	0	357	222	88
251	17.1	0	0	scaffold00001	1794579	1794619	-10643908	+	R=44	TE/TE_unclass	205	245	-2	89
666	10.2	3.2	5.9	scaffold00001	1828925	1829081	-10609446	C	Contig1	simple_repeat	-155	202	50	90
254	34.3	1.5	1.5	scaffold00001	1864453	1864653	-10573874	C	R=69	TE/TE_unclass	-373	341	141	91
1428	1.5	0	22.1	scaffold00001	1889020	1889268	-10549259	C	Contig1	simple_repeat	-136	221	16	92
279	17.7	11.3	0	scaffold00001	1946198	1946259	-10492268	C	R=40	TE/TE_unclass	0	71	3	93
623	18.3	4.5	1.1	scaffold00001	1951123	1951299	-10487228	C	Contig17	RC/Helitron	-284	198	16	94
605	16.8	0	0	scaffold00001	1953237	1953343	-10485184	+	R=45	DNA/DNA_unclass	1	107	-103	95
348	12.7	0	0	scaffold00001	1953343	1953397	-10485130	+	R=53	TE/TE_unclass	11	65	-25	96		*
1685	11.8	0.4	0	scaffold00001	1969537	1969782	-10468745	+	R=44	TE/TE_unclass	1	247	0	97
550	8.5	3.3	3.3	scaffold00001	2075173	2075293	-10363234	+	Contig1	simple_repeat	39	159	-198	98
344	21.7	0	4	scaffold00001	2142874	2142950	-10295577	+	R=44	TE/TE_unclass	1	74	-173	99
897	6.7	0	0.8	scaffold00001	2152553	2152672	-10285855	+	Contig16	LTR/LTR_unclass	81	199	0	100
448	22.9	0.8	1.7	scaffold00001	2168367	2168405	-10270122	C	R=38	DNA/DNA_unclass	-1	137	19	101
493	13.6	0	0	scaffold00001	2168406	2168486	-10270041	C	R=30	DNA/TcMar	-1	96	16	102
441	5.1	0.7	0.7	scaffold00001	2172518	2172655	-10265872	C	Contig1	simple_repeat	0	357	220	103
1514	20.2	12.5	1.2	scaffold00001	2222478	2222853	-10215674	C	R=39	DNA/DNA_unclass	0	418	1	104
790	1.9	1.7	8.4	scaffold00001	2249089	2249265	-10189262	+	Contig1	simple_repeat	135	300	-57	105
412	6	1.1	4.7	scaffold00001	2254141	2254228	-10184299	+	Contig1	simple_repeat	64	148	-209	106
1059	13.8	0	0	scaffold00001	2321299	2321457	-10117070	+	Contig12	DNA/TcMar	1	159	-261	107
262	7	7	0	scaffold00001	2321453	2321495	-10117032	+	Contig31	DNA/hAT	383	428	0	108		*
1575	10.4	10	0	scaffold00001	2321500	2321740	-10116787	+	Contig12	DNA/TcMar	156	420	0	109
1023	19.2	6.4	0	scaffold00001	2330375	2330577	-10107950	C	R=8	DNA/TcMar	-4	216	1	110
617	8	0	6.8	scaffold00001	2340170	2340263	-10098264	+	R=13	LTR/LTR_unclass	1	88	-1	111
457	33.8	3.1	2.7	scaffold00001	2398840	2399061	-10039466	C	R=2	TE/TE_unclass	-204	729	507	112		*
919	29.8	0.9	1.2	scaffold00001	2398989	2399308	-10039219	+	R=2	TE/TE_unclass	454	772	-161	113
1515	0	0	0	scaffold00001	2474576	2474737	-9963790	+	R=25	DNA/TcMar	1	162	-2	114
1140	0.5	2.4	3.9	scaffold00001	2475227	2475433	-9963094	C	Contig1	simple_repeat	0	357	154	115
965	10.9	0	2.2	scaffold00001	2488071	2488210	-9950317	+	R=38	DNA/DNA_unclass	1	137	-1	116
470	20.6	13.1	0	scaffold00001	2497981	2498087	-9940440	C	Contig17	RC/Helitron	0	482	362	117
1762	1.5	0	0	scaffold00001	2500801	2500999	-9937528	+	Contig16	LTR/LTR_unclass	1	199	0	118
2082	0.8	1.6	0.8	scaffold00001	2502786	2503035	-9935492	C	Contig33_R=163	TE/TE_unclass	0	252	1	119
1685	32.5	1	1.1	scaffold00001	2503212	2503943	-9934584	+	R=21	LTR/Gypsy	1972	2702	-5957	120
733	36.1	1.9	2.4	scaffold00001	2503382	2504053	-9934474	C	Contig23fr	LTR/Gypsy	-2057	3418	2750	121		*
1843	34.8	3.4	2.7	scaffold00001	2504252	2506250	-9932277	+	R=21	LTR/Gypsy	3007	5018	-3641	120
4726	0.4	0	0	scaffold00001	2507112	2507620	-9930907	+	R=81_R=128_R=158	LTR/LTR_unclass	1	509	0	122
1762	1.5	0	0	scaffold00001	2510432	2510630	-9927897	+	Contig16	LTR/LTR_unclass	1	199	0	123
572	31.6	0.5	0.5	scaffold00001	2568839	2569026	-9869501	C	R=2	TE/TE_unclass	-194	739	552	124		*
991	28.9	0.7	1	scaffold00001	2568980	2569283	-9869244	+	R=2	TE/TE_unclass	437	739	-194	125
1060	15.3	6.1	2.5	scaffold00001	2582926	2583153	-9855374	C	R=78	LTR/LTR_unclass	0	236	1	126
228	24.2	5.2	5.2	scaffold00001	2617345	2617518	-9821009	+	R=11	DNA/hAT	488	661	-4057	127
559	29.2	1.6	1.6	scaffold00001	2631296	2631483	-9807044	C	R=2	TE/TE_unclass	-194	739	552	128		*
933	29.9	0.7	1	scaffold00001	2631437	2631740	-9806787	+	R=2	TE/TE_unclass	437	739	-194	129
1584	21.5	4.7	3.1	scaffold00001	2642501	2642884	-9795643	+	R=39	DNA/DNA_unclass	25	414	-4	130
4598	0	3.4	0	scaffold00001	2655285	2655789	-9782738	+	R=10	DNA/hAT	1	522	0	131
603	7.9	0	0	scaffold00001	2662698	2662773	-9775754	C	R=13	LTR/LTR_unclass	0	89	14	132
1230	6.5	3.4	0.3	scaffold00001	2683307	2683554	-9754973	C	Contig1	simple_repeat	-17	340	114	133
668	0	9	0	scaffold00001	2683483	2683582	-9754945	+	Contig1	simple_repeat	113	221	-136	134		*
309	11.1	33.3	0	scaffold00001	2716419	2716481	-9722046	C	R=13	LTR/LTR_unclass	-5	84	1	135
903	4.6	3.4	1.1	scaffold00001	2790638	2790812	-9647715	C	Contig1	simple_repeat	-177	180	2	136
512	17.1	0	0	scaffold00001	2805606	2805687	-9632840	C	R=183	TE/TE_unclass	-1	82	1	137
548	1.7	0	0	scaffold00001	2813155	2813341	-9625186	+	Contig1	simple_repeat	221	357	0	138
409	18.1	2.6	5.4	scaffold00001	2828655	2828806	-9609721	+	Contig1	simple_repeat	156	303	-54	139
682	7	0	0	scaffold00001	2829635	2829720	-9608807	+	R=74	TE/TE_unclass	4	89	-6	140
318	12.8	0	0	scaffold00001	2829958	2830004	-9608523	C	R=13	LTR/LTR_unclass	-1	88	42	141
333	6.5	0	4.3	scaffold00001	2830170	2830217	-9608310	C	R=13	LTR/LTR_unclass	-42	47	2	141
279	12.5	0	0	scaffold00001	2830266	2830305	-9608222	C	R=13	LTR/LTR_unclass	-49	40	1	142
281	10.3	0	0	scaffold00001	2834456	2834494	-9604033	C	R=30	DNA/TcMar	-58	39	1	143
235	13	0	0	scaffold00001	2850278	2850323	-9588204	+	R=11	DNA/hAT	631	676	-4042	144
237	15.2	5.6	7.1	scaffold00001	2869847	2869917	-9568610	C	Contig31	DNA/hAT	-229	199	130	145
1317	15	0	0.5	scaffold00001	2880492	2880712	-9557815	+	R=8	DNA/TcMar	1	220	0	146
286	5.4	1.1	0	scaffold00001	2919528	2919620	-9518907	+	Contig1	simple_repeat	1	94	-263	147
309	12	6.7	3.7	scaffold00001	2931971	2932074	-9506453	+	Contig1	simple_repeat	175	281	-76	148
233	22.9	0	0	scaffold00001	2941036	2941083	-9497444	+	R=38	DNA/DNA_unclass	91	138	0	149
227	15	2.5	0	scaffold00001	2956080	2956119	-9482408	+	Contig23fr	LTR/Gypsy	3499	3539	-1936	150
730	16.4	21.7	5.3	scaffold00001	2961262	2961473	-9477054	C	R=44	TE/TE_unclass	-1	246	2	151
708	20.3	2.6	7.1	scaffold00001	2984257	2984447	-9454080	C	R=8	DNA/TcMar	-30	190	8	152
3724	24.9	1	0.9	scaffold00001	3011802	3012727	-9425800	+	R=2	TE/TE_unclass	7	933	0	153
4020	23	0.7	0.7	scaffold00001	3066317	3067200	-9371327	C	R=2	TE/TE_unclass	-21	912	29	154
243	9.8	0	9.8	scaffold00001	3070918	3070962	-9367565	+	R=200	DNA/DNA_unclass	111	151	-199	155
430	20.2	0	1.2	scaffold00001	3070969	3071053	-9367474	C	R=74	TE/TE_unclass	-9	86	3	156
1148	7	1.9	3.9	scaffold00001	3085405	3085611	-9352916	+	Contig1	simple_repeat	17	219	-138	157
227	13	1.8	5.5	scaffold00001	3104240	3104296	-9334231	+	Contig20_fr_R=226_R=288	RC/Helitron	69	123	-5137	158
291	21.2	2.5	1.2	scaffold00001	3111525	3111605	-9326922	C	R=2	TE/TE_unclass	0	933	852	159
3760	23.4	0.7	0.7	scaffold00001	3112137	3112962	-9325565	C	R=2	TE/TE_unclass	-22	911	86	160
1360	21.9	2.5	4.6	scaffold00001	3121626	3121979	-9316548	C	R=200	DNA/DNA_unclass	-3	347	1	161
3784	23.1	0.8	1	scaffold00001	3123948	3124774	-9313753	+	R=2	TE/TE_unclass	86	911	-22	162
250	17.5	3.7	1.2	scaffold00001	3129828	3129908	-9308619	+	Contig1	simple_repeat	81	163	-194	163
255	2.8	0	5.6	scaffold00001	3130217	3130254	-9308273	+	Contig1	simple_repeat	113	148	-209	164
3230	0.3	0.3	0	scaffold00001	3148215	3148563	-9289964	+	R=200	DNA/DNA_unclass	1	350	0	165
379	11.1	0	1.6	scaffold00001	3237230	3237293	-9201234	C	R=13	LTR/LTR_unclass	-3	86	24	166
387	18.5	0	2.5	scaffold00001	3237304	3237386	-9201141	C	R=183	TE/TE_unclass	-2	81	1	167
3924	13.9	0.8	0.5	scaffold00001	3244076	3244675	-9193852	+	R=26	DNA/TcMar-Tc1	1060	1661	0	168
419	15.8	6	1.1	scaffold00001	3265032	3265114	-9173413	+	R=13	LTR/LTR_unclass	2	88	-1	169
545	23.7	0	7.1	scaffold00001	3271191	3271340	-9167187	C	Contig31	DNA/hAT	-286	142	3	170
442	12.2	3.4	4.9	scaffold00001	3328891	3329036	-9109491	C	Contig1	simple_repeat	-71	286	143	171
248	15	0	0	scaffold00001	3403656	3403695	-9034832	C	R=2	TE/TE_unclass	-400	533	494	172
255	32.7	4.4	4.4	scaffold00001	3418291	3418517	-9020010	C	R=54_R=322	DNA/TcMar	-714	300	74	173
864	14.3	17.9	1.1	scaffold00001	3421790	3422023	-9016504	+	R=181_R=62	LTR/LTR_unclass	1	273	0	174
888	1	0	0	scaffold00001	3422309	3422410	-9016117	+	R=193	TE/TE_unclass	1	102	0	175
363	8.3	5.6	0	scaffold00001	3452687	3452758	-8985769	+	Contig1	simple_repeat	76	151	-206	176
464	2.5	4.7	1.1	scaffold00001	3452815	3452934	-8985593	+	Contig1	simple_repeat	113	214	-143	177
499	8.7	0	0	scaffold00001	3472933	3473070	-8965457	C	Contig1	simple_repeat	-9	348	211	178
3209	1.9	0	0	scaffold00001	3480051	3480427	-8958100	+	R=7	DNA/DNA_unclass	1	377	0	179
55756	0	0	0	scaffold00001	3480454	3486679	-8951848	+	R=256_R=291_R=305_R=277	LTR/Copia	1	6226	0	180
2884	0.9	1.5	0	scaffold00001	3504800	3505133	-8933394	+	Contig9_R=103	LTR/LTR_unclass	1	339	0	181
341	11.7	5	0	scaffold00001	3543510	3543569	-8894958	C	Contig15_fr	DNA/TcMar-Tc1	0	501	439	182
695	12.8	0	0	scaffold00001	3559602	3559703	-8878824	C	Contig10_fl_Contig13	DNA/TcMar-Mariner	-1185	103	2	183
3934	0	0	0	scaffold00001	3597472	3597889	-8840638	+	R=39	DNA/DNA_unclass	1	418	0	184
1189	11.5	1.5	3.1	scaffold00001	3694298	3694494	-8744033	C	R=146	TE/TE_unclass	-24	194	1	185
1034	6.1	0.6	1.7	scaffold00001	3697411	3697592	-8740935	C	Contig1	simple_repeat	-29	328	149	186
2585	8.4	7.4	0.5	scaffold00001	3733513	3733905	-8704622	C	Contig12	DNA/TcMar	0	420	1	187
714	4.5	0	0	scaffold00001	3759396	3759483	-8679044	C	R=13	LTR/LTR_unclass	-1	88	1	188
237	6.6	0	0	scaffold00001	3760388	3760463	-8678064	C	Contig1	simple_repeat	-280	77	2	189
555	11.7	3.5	3.5	scaffold00001	3760487	3760655	-8677872	C	Contig1	simple_repeat	-155	202	34	190
242	7	1.8	8.8	scaffold00001	3763890	3763998	-8674529	+	Contig1	simple_repeat	117	218	-139	191
272	15.4	0	5.1	scaffold00001	3764048	3764129	-8674398	C	Contig1	simple_repeat	-221	136	59	192
40729	0	0	0	scaffold00001	3790236	3794835	-8643692	+	R=191	LTR/Copia	1	4600	0	193
590	21.8	5.4	1.1	scaffold00001	3809400	3809566	-8628961	C	Contig2	LTR/LTR_unclass	-22	174	1	194
825	15.1	11.1	1	scaffold00001	3809601	3809781	-8628746	+	Contig16	LTR/LTR_unclass	1	199	0	195
228	12.5	0	0	scaffold00001	3840041	3840072	-8598455	+	Contig21	DNA/TcMar-Tc1	2	33	-1365	196
858	19.8	0	0	scaffold00001	3878772	3878927	-8559600	+	R=236_fl_R=279_R-234_R=130	DNA/TcMar	1	156	-1330	197
279	0	0	0	scaffold00001	3878928	3878957	-8559570	C	R=14	DNA/TcMar	0	253	224	198
548	3.1	0	0	scaffold00001	3878960	3879023	-8559504	+	Contig15_fr	DNA/TcMar-Tc1	438	501	0	199
278	25.5	7.2	10.3	scaffold00001	3895449	3895767	-8542760	+	R=11	DNA/hAT	372	681	-4037	200
1090	16.5	4.6	5.9	scaffold00001	3924673	3924911	-8513616	C	R=44	TE/TE_unclass	-11	236	1	201
393	18.4	1.3	0	scaffold00001	3950660	3950735	-8487792	+	R=183	TE/TE_unclass	7	83	0	202
278	1.2	0	10.5	scaffold00001	3956729	3956823	-8481704	C	Contig1	simple_repeat	-158	199	114	203
537	9.6	0	0	scaffold00001	4018967	4019039	-8419488	+	R=30	DNA/TcMar	1	73	-24	204
416	24.1	12.1	0	scaffold00001	4019040	4019079	-8419448	+	R=38	DNA/DNA_unclass	4	130	-8	205
364	22.1	1.3	0	scaffold00001	4019176	4019252	-8419275	+	R=38	DNA/DNA_unclass	61	138	0	206
1508	14.2	0.4	0.4	scaffold00001	4033469	4033715	-8404812	C	R=44	TE/TE_unclass	0	247	1	207
493	10.2	0	8.7	scaffold00001	4046375	4046524	-8392003	C	Contig1	simple_repeat	-168	189	52	208
285	13.3	0	0	scaffold00001	4063254	4063298	-8375229	C	R=13	LTR/LTR_unclass	0	89	45	209
236	23.8	0	1.6	scaffold00001	4063957	4064020	-8374507	C	R=132_R=153	LTR/LTR_unclass	-52	423	361	210
448	2.7	3.9	5.9	scaffold00001	4085762	4085916	-8352611	C	Contig1	simple_repeat	-25	332	181	211
796	27.9	1.5	1.8	scaffold00001	4123300	4123573	-8314954	C	R=2	TE/TE_unclass	-224	709	437	212
429	27.3	2.5	2.5	scaffold00001	4123527	4123684	-8314843	+	R=2	TE/TE_unclass	552	709	-224	213		*
419	32.9	1.9	2.4	scaffold00001	4124509	4124720	-8313807	C	R=2	TE/TE_unclass	-171	762	552	214		*
792	31.9	0.9	1.5	scaffold00001	4124674	4125001	-8313526	+	R=2	TE/TE_unclass	437	762	-171	215
3107	0	0	0.8	scaffold00001	4126122	4126480	-8312047	+	R=109_contig5	DNA/hAT	1	356	0	216
1224	1	2.6	0.5	scaffold00001	4131572	4131765	-8306762	+	Contig1	simple_repeat	134	331	-26	217
602	0	0	3.8	scaffold00001	4171435	4171660	-8266867	C	Contig1	simple_repeat	0	357	215	218
12136	0	0	0.1	scaffold00001	4217022	4218337	-8220190	+	R=307	DNA/DNA_unclass	1	1314	0	219
1064	4.3	16.1	0	scaffold00001	4238946	4239106	-8199421	C	Contig15_fr	DNA/TcMar-Tc1	0	501	315	220		*
1102	0	0	0	scaffold00001	4239104	4239234	-8199293	+	R=14	DNA/TcMar	123	253	0	221
1653	21.2	0.8	4.8	scaffold00001	4239557	4239947	-8198580	+	R=7	DNA/DNA_unclass	1	376	-1	222
1563	20.2	3.2	4.6	scaffold00001	4245384	4245761	-8192766	+	R=7	DNA/DNA_unclass	4	376	-1	223
342	7.7	0.8	0	scaffold00001	4255371	4255487	-8183040	C	Contig1	simple_repeat	-18	339	222	224
539	19.3	0	8.7	scaffold00001	4255508	4255632	-8182895	+	R=7	DNA/DNA_unclass	262	376	-1	225
783	11.1	11.2	0	scaffold00001	4256850	4257057	-8181470	+	Contig31	DNA/hAT	133	407	-21	226
889	13.4	1.3	0.7	scaffold00001	4257058	4257207	-8181320	+	R=165	TE/TE_unclass	1	151	-100	227
407	17.5	1.7	10.4	scaffold00001	4257268	4257382	-8181145	C	R=165	TE/TE_unclass	-145	106	1	228
648	5.3	6.8	1	scaffold00001	4280916	4281107	-8157420	C	Contig1	simple_repeat	-8	349	147	229
319	21.9	1.6	0	scaffold00001	4285428	4285441	-8153086	C	R=38	DNA/DNA_unclass	-73	65	4	230
347	10.6	0	0	scaffold00001	4285442	4285488	-8153039	C	R=30	DNA/TcMar	-50	47	1	231
404	18.3	0	0	scaffold00001	4296691	4296761	-8141766	C	R=40	TE/TE_unclass	0	71	1	232
793	18.5	1.6	5.1	scaffold00001	4329433	4329614	-8108913	+	Contig2	LTR/LTR_unclass	1	176	-20	233
1198	1	2.4	2.4	scaffold00001	4333606	4333816	-8104711	C	Contig1	simple_repeat	0	357	147	234
1660	0	0	0	scaffold00001	4346864	4347049	-8091478	+	R=152	LTR/LTR_unclass	1	186	0	235
1660	0	0	0	scaffold00001	4350858	4351043	-8087484	+	R=152	LTR/LTR_unclass	1	186	0	236
639	5.1	3.9	2.8	scaffold00001	4359282	4359461	-8079066	+	Contig1	simple_repeat	170	351	-6	237
976	10.1	0	0	scaffold00001	4360369	4360506	-8078021	C	R=38	DNA/DNA_unclass	0	138	1	238
496	18.4	0	0	scaffold00001	4377704	4377790	-8060737	+	R=53	TE/TE_unclass	3	89	-1	239
262	32.3	3	2.4	scaffold00001	4388703	4388870	-8049657	C	R=2	TE/TE_unclass	-212	721	553	240		*
917	28.3	0.3	1	scaffold00001	4388849	4389155	-8049372	+	R=2	TE/TE_unclass	460	764	-169	241
504	6.3	0	0	scaffold00001	4426217	4426279	-8012248	+	Contig15_fr	DNA/TcMar-Tc1	437	499	-2	242
763	16.4	7.5	0	scaffold00001	4473232	4473377	-7965150	+	R=212	LTR/Copia	1	157	-4296	243
231	7.1	0	0	scaffold00001	4480276	4480331	-7958196	C	Contig1	simple_repeat	-241	116	61	244
438	12.6	2.7	7.9	scaffold00001	4492949	4493094	-7945433	C	Contig1	simple_repeat	-152	205	67	245
549	29.1	1.1	0.6	scaffold00001	4563899	4564074	-7874453	C	R=2	TE/TE_unclass	-204	729	553	246		*
1117	25.2	0.7	1	scaffold00001	4564046	4564354	-7874173	+	R=2	TE/TE_unclass	453	760	-173	247
530	30.4	1.4	1.4	scaffold00001	4586661	4586870	-7851657	C	R=2	TE/TE_unclass	-171	762	553	248		*
1094	24.9	0.7	0.7	scaffold00001	4586842	4587128	-7851399	+	R=2	TE/TE_unclass	453	739	-194	249
547	30	1.1	0.6	scaffold00001	4644337	4644517	-7794010	C	R=2	TE/TE_unclass	-199	734	553	250		*
901	29.6	2.4	4.6	scaffold00001	4644489	4644952	-7793575	+	R=2	TE/TE_unclass	453	906	-27	251
595	9.7	1.1	1.6	scaffold00001	4786650	4786837	-7651690	+	Contig1	simple_repeat	2	188	-169	252
787	9.2	15	0	scaffold00001	4813946	4814065	-7624462	+	R=38	DNA/DNA_unclass	1	138	0	253
1180	0.7	11.4	0	scaffold00001	4831758	4831897	-7606630	+	R=68	LTR/LTR_unclass	1	156	0	254
928	7.1	1.9	11.1	scaffold00001	4844747	4844953	-7593574	C	Contig1	simple_repeat	-54	303	114	255
484	3.8	7.6	0	scaffold00001	4844899	4844977	-7593550	+	Contig1	simple_repeat	114	198	-159	256		*
243	19.3	6.2	3	scaffold00001	4881983	4882046	-7556481	+	R=193	TE/TE_unclass	37	102	0	257
284	10.8	32.3	0	scaffold00001	4882298	4882362	-7556165	C	Contig10_fl_Contig13	DNA/TcMar-Mariner	0	1288	1203	258
488	6.5	0	0	scaffold00001	4902120	4902181	-7536346	+	R=45	DNA/DNA_unclass	149	210	0	259
1281	21	10.8	1.9	scaffold00001	4955606	4955940	-7482587	C	R=29	DNA/DNA_unclass	0	364	1	260
427	18.6	3.1	1	scaffold00001	4999395	4999492	-7439035	C	R=44	TE/TE_unclass	-113	134	35	261
444	10.6	1.5	0	scaffold00001	5020732	5020797	-7417730	C	R=8	DNA/TcMar	-143	77	11	262
2215	0	0	2.4	scaffold00001	5024004	5024260	-7414267	+	R=165	TE/TE_unclass	1	251	0	263
1453	1.5	1.9	7	scaffold00001	5045218	5045427	-7393100	+	Contig1	simple_repeat	157	356	-1	264
235	12.8	5.5	5.5	scaffold00001	5082986	5083076	-7355451	C	Contig1	simple_repeat	-105	252	162	265
353	2	0	0	scaffold00001	5090315	5090412	-7348115	+	Contig1	simple_repeat	1	98	-259	266
315	10.8	4.6	0	scaffold00001	5142645	5142709	-7295818	C	R=102	TE/TE_unclass	-53	227	160	267
245	12.8	0	8.5	scaffold00001	5161328	5161378	-7277149	+	Contig15_fr	DNA/TcMar-Tc1	440	486	-15	268
1179	4.3	0	0	scaffold00001	5168114	5168252	-7270275	C	R=26	DNA/TcMar-Tc1	0	1661	1523	269
266	18.5	1.9	0	scaffold00001	5209183	5209236	-7229291	C	R=109_contig5	DNA/hAT	-301	55	1	270
316	15.7	0	0	scaffold00001	5209552	5209602	-7228925	C	R=53	TE/TE_unclass	-9	81	31	271
707	11	0	0.9	scaffold00001	5211484	5211593	-7226934	+	R=8	DNA/TcMar	112	220	0	272
282	15.2	1.4	6	scaffold00001	5211792	5211861	-7226666	+	R=165	TE/TE_unclass	23	89	-162	273
900	5.8	0.8	0	scaffold00001	5220277	5220396	-7218131	C	Contig12	DNA/TcMar	0	420	300	274
373	11.3	0	0	scaffold00001	5220394	5220446	-7218081	C	Contig12	DNA/TcMar	-367	53	1	274		*
661	9.9	0	0	scaffold00001	5221619	5221719	-7216808	C	Contig15_fr	DNA/TcMar-Tc1	0	501	401	275
1228	10	1.1	0.6	scaffold00001	5222876	5223056	-7215471	C	Contig12	DNA/TcMar	0	420	239	276
243	13.5	0	0	scaffold00001	5223080	5223116	-7215411	C	Contig31	DNA/hAT	-386	42	6	277		*
1172	11	0	0.6	scaffold00001	5223093	5223265	-7215262	+	Contig12	DNA/TcMar	249	420	0	278
2406	7.3	5.3	2.6	scaffold00001	5292720	5293118	-7145409	C	Contig17	RC/Helitron	0	482	2	279
58578	0	0	0	scaffold00001	5294143	5300368	-7138159	+	R=256_R=291_R=305_R=277	LTR/Copia	1	6226	0	280
247	1.5	0	0	scaffold00001	5352594	5352661	-7085866	C	Contig1	simple_repeat	-288	69	2	281
612	2.2	1.9	1.9	scaffold00001	5352669	5352784	-7085743	C	Contig1	simple_repeat	-141	216	113	282		*
836	4.9	1.4	24.6	scaffold00001	5352706	5352920	-7085607	+	Contig1	simple_repeat	114	288	-69	283
302	1.7	1.7	0	scaffold00001	5364207	5364265	-7074262	+	Contig1	simple_repeat	63	122	-235	284
549	7.1	0	0	scaffold00001	5378582	5378651	-7059876	+	R=30	DNA/TcMar	28	97	0	285
425	19.3	1.8	4.5	scaffold00001	5378652	5378691	-7059836	+	R=38	DNA/DNA_unclass	31	137	-1	286
366	5.7	0.1	0	scaffold00001	5382365	5382470	-7056057	+	Contig1	simple_repeat	1	108	-249	287
2114	13.1	4	1.4	scaffold00001	5390224	5390571	-7047956	C	R=29	DNA/DNA_unclass	-2	362	6	288
305	27.9	0	2.9	scaffold00001	5413548	5413654	-7024873	+	Contig17	RC/Helitron	172	275	-207	289		*
319	15.1	0	6.7	scaffold00001	5413648	5413711	-7024816	+	R=165	TE/TE_unclass	1	60	-191	290
236	16	0	4	scaffold00001	5418076	5418127	-7020400	C	R=132_R=153	LTR/LTR_unclass	-40	435	366	291
1296	13.4	3.5	0.5	scaffold00001	5472684	5472885	-6965642	+	R=146	TE/TE_unclass	1	208	-10	292
962	28.3	3	1.3	scaffold00001	5477169	5477465	-6961062	C	R=2	TE/TE_unclass	-537	396	95	293
446	0	13.2	1	scaffold00001	5491878	5491968	-6946559	C	Contig1	simple_repeat	-139	218	117	294
373	8	6.7	4.7	scaffold00001	5492191	5492295	-6946232	+	Contig1	simple_repeat	161	267	-90	295
576	9	0	1.3	scaffold00001	5496890	5496968	-6941559	+	R=13	LTR/LTR_unclass	2	79	-10	296
455	13.2	6	1.1	scaffold00001	5513080	5513163	-6925364	+	R=53	TE/TE_unclass	2	89	-1	297
700	3	3.6	12.6	scaffold00001	5565938	5566162	-6872365	+	Contig1	simple_repeat	14	220	-137	298
258	1.4	0	0	scaffold00001	5583452	5583522	-6855005	+	Contig1	simple_repeat	1	71	-286	299
828	2.8	4.9	0	scaffold00001	5592126	5592268	-6846259	+	Contig1	simple_repeat	28	177	-180	300
226	22.8	5	9.3	scaffold00001	5600003	5600181	-6838346	+	R=11	DNA/hAT	528	699	-4019	301
357	1	0	0	scaffold00001	5601730	5601826	-6836701	+	Contig1	simple_repeat	1	97	-260	302
320	0	0	0	scaffold00001	5604746	5604829	-6833698	C	Contig1	simple_repeat	-273	84	1	303
2231	16.2	5.5	3.7	scaffold00001	5611014	5611486	-6827041	C	Contig17	RC/Helitron	0	482	2	304
48318	0	0.1	0	scaffold00001	5611491	5616619	-6821908	C	Contig20_fr_R=226_R=288	RC/Helitron	0	5260	129	305
1088	0	0	4.7	scaffold00001	5617430	5617563	-6820964	C	Contig20_fr_R=226_R=288	RC/Helitron	-5132	128	1	305
623	25.3	1.7	2.3	scaffold00001	5642727	5642900	-6795627	+	Contig2	LTR/LTR_unclass	4	176	-20	306
243	17.9	9.5	7	scaffold00001	5646376	5646459	-6792068	+	Contig20_fr_R=226_R=288	RC/Helitron	68	153	-5107	307
249	30.4	2.1	1.1	scaffold00001	5647634	5647726	-6790801	+	R=38	DNA/DNA_unclass	45	138	0	308
504	11.2	6	5.3	scaffold00001	5654328	5654478	-6784049	C	Contig1	simple_repeat	-75	282	131	309
240	13.6	0	0	scaffold00001	5668943	5668986	-6769541	+	R=132_R=153	LTR/LTR_unclass	366	409	-66	310
449	19.8	0	0	scaffold00001	5669259	5669344	-6769183	+	R=53	TE/TE_unclass	1	86	-4	311
420	14.8	11.1	0	scaffold00001	5669360	5669440	-6769087	+	R=109_contig5	DNA/hAT	1	90	-266	312
278	21.1	4.2	0	scaffold00001	5690064	5690134	-6748393	+	R=30	DNA/TcMar	1	74	-23	313
308	25	3.4	0	scaffold00001	5691039	5691126	-6747401	+	R=25	DNA/TcMar	1	91	-73	314
234	27	0	0	scaffold00001	5691178	5691240	-6747287	+	R=25	DNA/TcMar	102	164	0	315
2047	0	0	0	scaffold00001	5704063	5704283	-6734244	+	R=107	LTR/LTR_unclass	1	221	0	316
494	28.8	7	6.2	scaffold00001	5708392	5708821	-6729706	C	R=21	LTR/Gypsy	-4935	3724	3292	317
1532	33.5	1.5	1.5	scaffold00001	5709306	5710090	-6728437	+	Contig23fr	LTR/Gypsy	2751	3535	-1940	318
364	36	2.3	2.3	scaffold00001	5711117	5711426	-6727101	+	Contig23fr	LTR/Gypsy	4583	4892	-583	318
2047	0	0	0	scaffold00001	5711897	5712117	-6726410	+	R=107	LTR/LTR_unclass	1	221	0	319
250	9.6	0.3	1.7	scaffold00001	5729417	5729475	-6709052	+	R=132_R=153	LTR/LTR_unclass	354	417	-58	320
3247	27.9	0.9	1.1	scaffold00001	5738317	5739245	-6699282	+	R=2	TE/TE_unclass	1	927	-6	321
1185	2.3	2.2	2.2	scaffold00001	5743789	5743969	-6694558	C	Contig1	simple_repeat	-153	204	24	322
856	22	0.6	0	scaffold00001	5769409	5769590	-6668937	+	Contig2	LTR/LTR_unclass	1	183	-13	323
597	13.3	0	0	scaffold00001	5771271	5771360	-6667167	+	R=53	TE/TE_unclass	1	90	0	324
419	15.9	0	0	scaffold00001	5771468	5771536	-6666991	C	R=109_contig5	DNA/hAT	-1	355	287	325
526	15.7	0	1.2	scaffold00001	5771636	5771719	-6666808	+	R=183	TE/TE_unclass	1	83	0	326
1326	15.3	11.4	0	scaffold00001	5771720	5771974	-6666553	C	R=109_contig5	DNA/hAT	-71	285	2	325
231	7.7	0	0	scaffold00001	5817209	5817247	-6621280	C	R=132_R=153	LTR/LTR_unclass	-72	403	365	327
286	18.1	0	1.4	scaffold00001	5821037	5821109	-6617418	C	R=132_R=153	LTR/LTR_unclass	-53	422	351	328
350	16.6	6.3	3.4	scaffold00001	5826726	5826868	-6611659	+	Contig1	simple_repeat	159	305	-52	329
421	3.1	0	0	scaffold00001	5831041	5831168	-6607359	C	Contig1	simple_repeat	-5	352	225	330
247	15.5	4.2	1.4	scaffold00001	5842919	5842990	-6595537	+	Contig1	simple_repeat	84	157	-200	331
1419	12.3	0	0.9	scaffold00001	5853062	5853283	-6585244	C	R=8	DNA/TcMar	0	220	1	332
371	0	11.4	1.3	scaffold00001	5859856	5859925	-6578602	+	Contig1	simple_repeat	117	193	-164	333
792	1.9	2.5	2.5	scaffold00001	5860030	5860192	-6578335	C	Contig1	simple_repeat	-194	163	1	334
234	25.6	4.7	3.5	scaffold00001	5913600	5913769	-6524758	C	R=11	DNA/hAT	-4054	664	493	335
561	21.2	21	3.3	scaffold00001	5941832	5942007	-6496520	C	R=8	DNA/TcMar	-13	207	1	336
433	24	13.8	4.2	scaffold00001	5952055	5952250	-6486277	+	R=236_fl_R=279_R-234_R=130	DNA/TcMar	1272	1485	-1	337
1179	4.2	0	0	scaffold00001	5957903	5958045	-6480482	C	Contig15_fr	DNA/TcMar-Tc1	0	501	359	338
759	0	0	0	scaffold00001	5958042	5958124	-6480403	+	R=14	DNA/TcMar	171	253	0	339		*
913	2.9	0.7	4.3	scaffold00001	5958650	5958795	-6479732	C	Contig1	simple_repeat	-164	193	53	340
1038	16.7	1.8	4.5	scaffold00001	5962719	5962944	-6475583	+	R=8	DNA/TcMar	1	220	0	341
890	0.5	7.2	1	scaffold00001	6026556	6026748	-6411779	C	Contig1	simple_repeat	-28	329	125	342
465	0	0	1.8	scaffold00001	6054850	6054905	-6383622	+	Contig1	simple_repeat	167	221	-136	343		*
1138	3.2	1.1	8.2	scaffold00001	6054858	6055099	-6383428	C	Contig1	simple_repeat	-136	221	16	344
256	23	5.4	5.4	scaffold00001	6056700	6056791	-6381736	+	R=2	TE/TE_unclass	68	159	-774	345
3026	25.9	0.4	0.9	scaffold00001	6057076	6057884	-6380643	+	R=2	TE/TE_unclass	106	910	-23	346
2922	26.8	0.5	1	scaffold00001	6062667	6063487	-6375040	+	R=2	TE/TE_unclass	106	922	-11	347
1233	2.3	1.7	0	scaffold00001	6177276	6177451	-6261076	C	Contig1	simple_repeat	-37	320	142	348
602	14.4	0	0	scaffold00001	6178806	6178895	-6259632	C	R=53	TE/TE_unclass	0	90	1	349
1678	19.2	13.7	0.9	scaffold00001	6180558	6180967	-6257560	C	Contig17	RC/Helitron	-5	477	16	350
568	1.4	0.3	0.6	scaffold00001	6212368	6212590	-6225937	C	Contig1	simple_repeat	0	357	211	351
2470	15.3	7.3	1.3	scaffold00001	6238915	6239365	-6199162	+	R=26	DNA/TcMar-Tc1	1	478	-1183	352
416	10.2	0	0	scaffold00001	6239382	6239440	-6199087	+	R=26	DNA/TcMar-Tc1	1593	1651	-10	353
656	6	0	1.2	scaffold00001	6262753	6262836	-6175691	+	R=183	TE/TE_unclass	1	83	0	354
908	16.6	2.9	12.3	scaffold00001	6262868	6263107	-6175420	C	R=8	DNA/TcMar	0	220	1	355
1245	13.4	7.5	0.8	scaffold00001	6297089	6297314	-6141213	C	R=44	TE/TE_unclass	-5	242	2	356
525	23.1	7.6	0.7	scaffold00001	6316059	6316202	-6122325	C	R=265	LTR/LTR_unclass	0	154	1	357
427	21.6	0	0	scaffold00001	6326941	6327028	-6111499	C	R=13	LTR/LTR_unclass	-1	88	1	358
2773	5.5	0	0	scaffold00001	6331614	6331960	-6106567	C	R=200	DNA/DNA_unclass	0	350	4	359
226	11.8	0	0	scaffold00001	6332193	6332226	-6106301	C	R=38	DNA/DNA_unclass	0	138	105	360
1215	2	1	1.9	scaffold00001	6333065	6333271	-6105256	+	Contig1	simple_repeat	152	356	-1	361
631	10.3	0	0	scaffold00001	6349825	6349921	-6088606	+	R=30	DNA/TcMar	1	97	0	362
564	21.3	0.7	0.7	scaffold00001	6349922	6349958	-6088569	+	R=38	DNA/DNA_unclass	4	137	-1	363
977	3.2	2.6	0	scaffold00001	6351383	6351538	-6086989	+	Contig1	simple_repeat	23	182	-175	364
14804	0.3	0	0	scaffold00001	6362935	6364595	-6073932	C	R=26	DNA/TcMar-Tc1	0	1661	1	365
2842	27.9	2.4	3.8	scaffold00001	6397370	6398529	-6039998	C	R=21	LTR/Gypsy	0	8659	7515	366
602	31.6	1.7	7.1	scaffold00001	6398803	6399217	-6039310	C	R=21	LTR/Gypsy	-1412	7247	6854	366
334	26.6	0	0	scaffold00001	6399809	6399902	-6038625	C	R=21	LTR/Gypsy	-2345	6314	6221	366
11660	28.3	1.1	1.1	scaffold00001	6400512	6404262	-6034265	C	R=21	LTR/Gypsy	-3561	5098	1348	366
2922	27.4	4.8	1.4	scaffold00001	6404528	6405578	-6032949	C	R=21	LTR/Gypsy	-7571	1088	3	366
1076	14.1	4.5	1	scaffold00001	6418204	6418404	-6020123	+	R=45	DNA/DNA_unclass	3	210	0	367
991	1.5	3.9	1.9	scaffold00001	6428255	6428459	-6010068	+	Contig1	simple_repeat	149	357	0	368
434	0.1	0	0	scaffold00001	6428359	6428479	-6010048	C	Contig1	simple_repeat	-243	114	1	369		*
359	2.2	0	0	scaffold00001	6434641	6434685	-6003842	C	R=55	TE/TE_unclass	-1	123	79	370
683	10.1	0	0	scaffold00001	6477361	6477449	-5961078	C	R=13	LTR/LTR_unclass	0	89	1	371
956	0	0	0	scaffold00001	6531079	6531179	-5907348	+	Contig1	simple_repeat	115	215	-142	372
356	10	2.5	18.2	scaffold00001	6531146	6531341	-5907186	+	Contig1	simple_repeat	114	283	-74	373		*
3902	23.1	0.7	0.8	scaffold00001	6565898	6566813	-5871714	+	R=2	TE/TE_unclass	18	932	-1	374
233	12.9	0	0.8	scaffold00001	6569397	6569521	-5869006	C	Contig1	simple_repeat	-12	345	222	375
347	15.8	7.9	0	scaffold00001	6590018	6590093	-5848434	C	R=183	TE/TE_unclass	0	83	2	376
3176	22.1	0.6	0.6	scaffold00001	6602367	6603030	-5835497	C	R=2	TE/TE_unclass	-252	681	18	377
307	30	0	0	scaffold00001	6609868	6609947	-5828580	C	R=8	DNA/TcMar	-7	213	134	378
353	21.9	0	2.7	scaffold00001	6610115	6610189	-5828338	C	R=78	LTR/LTR_unclass	-147	89	17	379
366	18.3	1.4	0	scaffold00001	6610363	6610433	-5828094	C	R=8	DNA/TcMar	-148	72	1	378
769	3.1	7.1	1.4	scaffold00001	6631142	6631339	-5807188	C	Contig1	simple_repeat	-18	339	131	380
608	22.2	2.4	3.7	scaffold00001	6662157	6662320	-5776207	C	R=77	LTR/LTR_unclass	-25	164	3	381
2233	16.6	9.3	0.4	scaffold00001	6671241	6671682	-5766845	+	Contig17	RC/Helitron	2	482	0	382
1771	13.4	3.4	2.7	scaffold00001	6704443	6704740	-5733787	C	Contig12	DNA/TcMar	0	420	121	383
254	15.8	0.9	0	scaffold00001	6711351	6711429	-5727098	C	R=11	DNA/hAT	-4046	672	597	384
572	12.8	10	0.8	scaffold00001	6727146	6727255	-5711272	C	Contig20_fr_R=226_R=288	RC/Helitron	-5137	123	4	385
949	9.2	0	0	scaffold00001	6730103	6730232	-5708295	C	Contig15_fr	DNA/TcMar-Tc1	-4	497	368	386
790	6.1	0	0	scaffold00001	6730233	6730331	-5708196	+	R=21	LTR/Gypsy	3	101	-8558	387
245	16.1	12.5	0	scaffold00001	6730398	6730453	-5708074	+	R=79	DNA/Mutatorlike	309	371	-505	388
2673	11.3	5.8	0	scaffold00001	6769375	6769771	-5668756	C	Contig12	DNA/TcMar	0	420	1	389
608	11.4	5.7	0.7	scaffold00001	6772602	6772742	-5665785	C	Contig1	simple_repeat	-177	180	33	390
792	12.5	25.6	0	scaffold00001	6816967	6817134	-5621393	+	R=8	DNA/TcMar	2	212	-8	391
593	9.5	1.9	6.6	scaffold00001	6823923	6824080	-5614447	+	Contig1	simple_repeat	50	200	-157	392
2740	8.1	1.1	0	scaffold00001	6852812	6853171	-5585356	+	R=29	DNA/DNA_unclass	1	364	0	393
1347	1.8	0.6	0	scaffold00001	6855178	6855348	-5583179	+	Contig1	simple_repeat	34	205	-152	394
1069	11.8	0	0	scaffold00001	6900059	6900211	-5538316	C	Contig12	DNA/TcMar	-267	153	1	395
1089	7.2	2.9	0.5	scaffold00001	6914758	6914965	-5523562	+	Contig1	simple_repeat	140	352	-5	396
269	13.5	0.9	0	scaffold00001	6914868	6914978	-5523549	C	Contig1	simple_repeat	-243	114	3	397		*
293	18.6	6.5	1.9	scaffold00001	6922132	6922284	-5516243	C	Contig1	simple_repeat	-151	206	47	398
1168	13.3	1.1	0	scaffold00001	6970415	6970594	-5467933	+	R=8	DNA/TcMar	39	220	0	399
942	2.8	1.7	0	scaffold00001	6984399	6984576	-5453951	C	Contig1	simple_repeat	0	357	177	400
251	14.6	0	0	scaffold00001	7004681	7004721	-5433806	C	R=53	TE/TE_unclass	-49	41	1	401
2084	6.2	13.1	0	scaffold00001	7040505	7040809	-5397718	C	Contig17	RC/Helitron	0	482	138	402
474	11.1	0	9.6	scaffold00001	7048835	7048914	-5389613	C	R=74	TE/TE_unclass	-10	85	13	403
296	7.5	4.4	1.4	scaffold00001	7074704	7074771	-5363756	+	Contig1	simple_repeat	68	137	-220	404
235	20	0	0	scaffold00001	7081165	7081219	-5357308	C	R=44	TE/TE_unclass	0	247	193	405
447	11.4	5.3	0.7	scaffold00001	7091059	7091190	-5347337	+	Contig1	simple_repeat	49	186	-171	406
959	28.5	0.9	1.5	scaffold00001	7145803	7146130	-5292397	C	R=2	TE/TE_unclass	-171	762	437	407
601	31	3.9	4.8	scaffold00001	7145960	7146271	-5292256	+	R=2	TE/TE_unclass	431	739	-194	408		*
396	13.9	1.9	7.5	scaffold00001	7151248	7151402	-5287125	+	Contig1	simple_repeat	69	215	-142	409
236	11.1	1.4	0	scaffold00001	7151470	7151541	-5286986	+	Contig1	simple_repeat	43	115	-242	410
711	8.8	1.3	5.3	scaffold00001	7155255	7155410	-5283117	+	Contig1	simple_repeat	50	199	-158	411
240	14.5	0	17.5	scaffold00001	7224727	7224793	-5213734	+	R=40	TE/TE_unclass	11	67	-4	412
347	20.9	1.8	8.7	scaffold00001	7251436	7251545	-5186982	C	Contig17	RC/Helitron	-3	479	377	413
298	20.1	1.1	7	scaffold00001	7284998	7285088	-5153439	+	Contig15_fr	DNA/TcMar-Tc1	337	422	-79	414
445	32.9	0.9	1.4	scaffold00001	7319241	7319453	-5119074	C	R=2	TE/TE_unclass	-170	763	552	415		*
697	31.7	0.7	1	scaffold00001	7319407	7319699	-5118828	+	R=2	TE/TE_unclass	437	728	-205	416
713	30.2	0.7	1.1	scaffold00001	7358062	7358342	-5080185	C	R=2	TE/TE_unclass	-217	716	437	417
461	32.4	0.9	1.4	scaffold00001	7358296	7358508	-5080019	+	R=2	TE/TE_unclass	552	763	-170	418		*
675	15.1	0	1.6	scaffold00001	7365070	7365197	-5073330	+	Contig15_fr	DNA/TcMar-Tc1	373	498	-3	419
1634	3.5	0	0	scaffold00001	7387161	7387358	-5051169	C	R=95	LTR/LTR_unclass	-164	249	52	420
2982	0.3	0	0	scaffold00001	7387359	7387694	-5050833	+	R=155	DNA/DNA_unclass	1	336	0	421
277	29.5	5.2	2.9	scaffold00001	7388418	7388553	-5049974	+	R=52	DNA/TcMar-Tc1	970	1108	-224	422
1784	0.5	0	0	scaffold00001	7388723	7388924	-5049603	C	R=155	DNA/DNA_unclass	-134	202	1	423
422	5.7	0	0	scaffold00001	7388925	7388973	-5049554	C	R=95	LTR/LTR_unclass	-364	49	1	424
245	18.5	3	3	scaffold00001	7388974	7388987	-5049540	+	Contig28	LTR/Copia	833	899	-3321	425
631	2	1	0	scaffold00001	7396360	7396460	-5042067	C	Contig1	simple_repeat	-141	216	115	426
396	14.5	2.6	9.5	scaffold00001	7396391	7396581	-5041946	+	Contig1	simple_repeat	114	292	-65	427		*
279	16.4	3.6	0	scaffold00001	7430632	7430686	-5007841	+	R=102	TE/TE_unclass	1	57	-223	428
325	17.5	6.3	0	scaffold00001	7433491	7433553	-5004974	+	R=8	DNA/TcMar	1	67	-153	429
254	23.1	0.7	28	scaffold00001	7497453	7497602	-4940925	+	R=165	TE/TE_unclass	6	123	-128	430		*
572	21.4	0	0	scaffold00001	7497562	7497678	-4940849	C	R=8	DNA/TcMar	-103	117	1	431
568	0.1	0	3	scaffold00001	7505040	7505211	-4933316	+	Contig1	simple_repeat	219	357	0	432
608	12.7	5.9	7.7	scaffold00001	7513557	7513675	-4924852	C	Contig2	LTR/LTR_unclass	-78	118	2	433
568	22.3	0.8	1.6	scaffold00001	7513676	7513789	-4924738	C	R=38	DNA/DNA_unclass	-19	119	7	434
39905	0	0.1	0	scaffold00001	7519242	7523956	-4914571	+	R=11	DNA/hAT	1	4718	0	435
1268	13	17.1	2.1	scaffold00001	7531689	7531940	-4906587	C	R=109_contig5	DNA/hAT	-67	289	1	436
565	25.1	7.5	1.5	scaffold00001	7556236	7556421	-4882106	C	R=8	DNA/TcMar	-10	210	14	437
548	5	4.8	3.5	scaffold00001	7558078	7558244	-4880283	C	Contig1	simple_repeat	-187	170	2	438
256	13.2	0	0	scaffold00001	7566533	7566570	-4871957	+	R=21	LTR/Gypsy	8464	8501	-158	439
983	11.9	2.5	0	scaffold00001	7566926	7567084	-4871443	C	Contig17	RC/Helitron	-318	164	2	440
760	5.8	2.5	3.8	scaffold00001	7594068	7594229	-4844298	+	Contig1	simple_repeat	40	199	-158	441
37351	0	0	0.2	scaffold00001	7612445	7616663	-4821864	+	Contig26_fr_R=289_R=204	LTR/Copia	1	4210	0	442
310	12.5	0	0	scaffold00001	7688774	7688821	-4749706	+	R=8	DNA/TcMar	1	48	-172	443
2081	15	11.5	0.2	scaffold00001	7688826	7689200	-4749327	+	R=39	DNA/DNA_unclass	2	418	0	444
786	12.5	6	3.9	scaffold00001	7689201	7689348	-4749179	+	R=8	DNA/TcMar	70	220	0	445
716	6.7	0	0	scaffold00001	7695314	7695403	-4743124	+	R=120	TE/TE_unclass	12	101	-101	446		*
1102	9.7	0	0	scaffold00001	7695403	7695547	-4742980	C	R=236_fl_R=279_R-234_R=130	DNA/TcMar	-1341	145	1	447
253	7.6	7.5	1.4	scaffold00001	7716023	7716089	-4722438	+	R=132_R=153	LTR/LTR_unclass	353	423	-52	448
230	10.9	2	6.4	scaffold00001	7768893	7768941	-4669586	C	Contig20_fr_R=226_R=288	RC/Helitron	-5117	143	97	449
241	21.8	0	6.7	scaffold00001	7791113	7791176	-4647351	+	R=26	DNA/TcMar-Tc1	1586	1645	-16	450
358	24.6	2.6	7.3	scaffold00001	7799268	7799381	-4639146	+	Contig30	LTR/Copia	1	109	-2392	451
240	9.1	0	0	scaffold00001	7805116	7805159	-4633368	+	R=132_R=153	LTR/LTR_unclass	367	410	-65	452
351	8.8	3.2	3.2	scaffold00001	7807114	7807207	-4631320	+	Contig1	simple_repeat	63	156	-201	453
343	22.7	8.3	0.8	scaffold00001	7814480	7814508	-4624019	C	R=38	DNA/DNA_unclass	-8	130	4	454
453	15.7	9	0	scaffold00001	7814509	7814597	-4623930	C	R=30	DNA/TcMar	0	97	1	455
321	2.4	2.4	0	scaffold00001	7814639	7814680	-4623847	C	Contig17	RC/Helitron	-25	457	415	456
442	12.9	0	0	scaffold00001	7825827	7825896	-4612631	C	R=25	DNA/TcMar	0	164	95	457
494	13.3	0	2.4	scaffold00001	7826286	7826370	-4612157	+	Contig10_fl_Contig13	DNA/TcMar-Mariner	842	924	-364	458
379	10.4	4.5	0	scaffold00001	7826381	7826447	-4612080	+	R=40	TE/TE_unclass	2	71	0	459
812	21.2	1	2	scaffold00001	7826556	7826752	-4611775	+	Contig2	LTR/LTR_unclass	1	195	-1	460
283	19.6	0	0	scaffold00001	7826754	7826809	-4611718	C	R=93	LTR/LTR_unclass	-124	56	1	461
490	1.5	0	3.4	scaffold00001	7829550	7829753	-4608774	C	Contig1	simple_repeat	0	357	219	462
233	21.6	0	0	scaffold00001	7838092	7838142	-4600385	C	R=44	TE/TE_unclass	0	247	197	463
1374	5.4	0	0	scaffold00001	7919731	7919895	-4518632	C	R=44	TE/TE_unclass	-8	239	75	464
1018	13	19.4	1.2	scaffold00001	7919896	7920147	-4518380	C	R=29	DNA/DNA_unclass	0	364	67	465
276	5.6	0	0	scaffold00001	7920148	7920183	-4518344	+	Contig31	DNA/hAT	1	36	-392	466
343	7.1	0	0	scaffold00001	7920215	7920256	-4518271	C	Contig31	DNA/hAT	-386	42	1	467
599	10.7	1.2	0	scaffold00001	7920257	7920330	-4518197	C	R=29	DNA/DNA_unclass	-289	75	1	468
574	20.7	0	0	scaffold00001	7966832	7966942	-4471585	+	R=236_fl_R=279_R-234_R=130	DNA/TcMar	1376	1486	0	469
285	30.8	3	2.2	scaffold00001	7972508	7972640	-4465887	C	R=2	TE/TE_unclass	-239	694	561	470
232	14.3	0	0	scaffold00001	7972662	7972696	-4465831	C	R=52	DNA/TcMar-Tc1	-1256	76	42	471
12095	0	0	0.2	scaffold00001	7981635	7982925	-4455602	C	Contig10_fl_Contig13	DNA/TcMar-Mariner	0	1288	1	472
556	33	1.2	2.4	scaffold00001	8050252	8050586	-4387941	+	R=2	TE/TE_unclass	432	762	-171	473
313	29.1	2.9	2.9	scaffold00001	8050722	8050859	-4387668	+	R=2	TE/TE_unclass	596	733	-200	474
427	14.3	2.1	3.2	scaffold00001	8053483	8053576	-4384951	+	R=207	DNA/DNA_unclass	1	93	-227	475		*
802	10.9	0	0	scaffold00001	8053554	8053672	-4384855	C	R=20	TE/TE_unclass	-20	119	1	476
1966	13.1	3.4	1.8	scaffold00001	8054440	8054766	-4383761	+	Contig19	DNA/TcMar	1	332	0	477
987	0	1.6	8.1	scaffold00001	8058980	8059163	-4379364	+	Contig1	simple_repeat	119	291	-66	478
286	20	3.8	0	scaffold00001	8090957	8091036	-4347491	+	R=11	DNA/hAT	488	570	-4148	479
744	21.3	2.6	3.2	scaffold00001	8105992	8106146	-4332381	+	R=265	LTR/LTR_unclass	1	154	0	480
888	13.4	0	0.8	scaffold00001	8144275	8144409	-4294118	+	R=38	DNA/DNA_unclass	5	138	0	481
669	9.1	0	0	scaffold00001	8144905	8144992	-4293535	+	R=13	LTR/LTR_unclass	1	88	-1	482
573	0.8	0	1.2	scaffold00001	8148375	8148646	-4289881	+	Contig1	simple_repeat	219	357	0	483
300	22.4	2.6	0	scaffold00001	8150584	8150659	-4287868	C	R=13	LTR/LTR_unclass	-11	78	1	484
621	12.4	0	0	scaffold00001	8154056	8154144	-4284383	+	R=13	LTR/LTR_unclass	1	89	0	485
233	14.3	0	1.3	scaffold00001	8155206	8155283	-4283244	C	Contig1	simple_repeat	-242	115	39	486
573	0.7	0	1.8	scaffold00001	8155676	8155937	-4282590	+	Contig1	simple_repeat	219	357	0	487
4680	0	2.1	0	scaffold00001	8178360	8178870	-4259657	C	R=10	DNA/hAT	0	522	1	488
226	19.1	0	0	scaffold00001	8223029	8223070	-4215457	C	R=236_fl_R=279_R-234_R=130	DNA/TcMar	-271	1215	1174	489
1348	12.1	1.4	0	scaffold00001	8241013	8241219	-4197308	+	R=45	DNA/DNA_unclass	1	210	0	490
583	17.4	3.5	0.8	scaffold00001	8241315	8241430	-4197097	C	R=212	LTR/Copia	-4306	147	29	491
352	11.5	1.6	1.6	scaffold00001	8241588	8241649	-4196878	+	R=40	TE/TE_unclass	10	71	0	492
426	19.5	1.2	0	scaffold00001	8300676	8300757	-4137770	+	R=38	DNA/DNA_unclass	56	138	0	493
591	16	0	0	scaffold00001	8303500	8303593	-4134934	+	R=30	DNA/TcMar	2	95	-2	494
514	23.4	0.8	1.6	scaffold00001	8303594	8303629	-4134898	+	R=38	DNA/DNA_unclass	5	133	-5	495
329	5.5	5.3	3.9	scaffold00001	8315457	8315532	-4122995	+	Contig1	simple_repeat	74	150	-207	496
232	3.6	0	0	scaffold00001	8319427	8319481	-4119046	C	Contig1	simple_repeat	-302	55	1	497
298	7	5.1	9.2	scaffold00001	8330027	8330105	-4108422	+	Contig1	simple_repeat	113	188	-169	498
1171	4.5	0.6	2.2	scaffold00001	8332268	8332449	-4106078	C	Contig1	simple_repeat	-146	211	33	499
1012	17.9	0	9.6	scaffold00001	8354613	8354853	-4083674	C	R=8	DNA/TcMar	0	220	1	500
411	18.1	7.6	0	scaffold00001	8355151	8355255	-4083272	+	R=102	TE/TE_unclass	1	113	-167	501
276	27.6	4	2.3	scaffold00001	8372339	8372464	-4066063	C	R=121	LTR/LTR_unclass	-29	128	1	502
1370	14.8	1.4	0	scaffold00001	8412589	8412805	-4025722	C	R=8	DNA/TcMar	0	220	1	503
470	20.9	0	1.1	scaffold00001	8413730	8413821	-4024706	C	R=236_fl_R=279_R-234_R=130	DNA/TcMar	-1395	91	1	504
942	8.7	0	0	scaffold00001	8432651	8432777	-4005750	+	R=120	TE/TE_unclass	1	127	-75	505		*
1483	14.1	11.6	0.3	scaffold00001	8432777	8433061	-4005466	+	Contig17	RC/Helitron	11	327	-155	506
759	12	5.1	9.3	scaffold00001	8433361	8433516	-4005011	+	Contig17	RC/Helitron	333	482	0	506
294	13.9	0	0	scaffold00001	8433529	8433571	-4004956	+	R=120	TE/TE_unclass	128	170	-32	505
225	15.4	0	0	scaffold00001	8433669	8433707	-4004820	+	R=120	TE/TE_unclass	163	201	-1	505
2113	9.7	3	0	scaffold00001	8434024	8434323	-4004204	+	Contig15_fr	DNA/TcMar-Tc1	193	501	0	507
538	18	0	0	scaffold00001	8434324	8434403	-4004124	+	Contig15_fr	DNA/TcMar-Tc1	418	497	-4	508
547	14	2	7.8	scaffold00001	8459723	8459924	-3978603	C	Contig1	simple_repeat	-165	192	2	509
888	0	1	0	scaffold00001	8461227	8461323	-3977204	+	Contig1	simple_repeat	117	214	-143	510
4853	0	0.2	0	scaffold00001	8464945	8465463	-3973064	C	R=10	DNA/hAT	-2	520	1	511
3934	0	0	0	scaffold00001	8488474	8488891	-3949636	C	R=39	DNA/DNA_unclass	0	418	1	512
1197	15.6	2.4	0	scaffold00001	8489012	8489216	-3949311	C	R=45	DNA/DNA_unclass	0	210	1	513
740	5.6	0	0	scaffold00001	8501644	8501732	-3936795	+	R=13	LTR/LTR_unclass	1	89	0	514
1776	0	0	0	scaffold00001	8531328	8531516	-3907011	+	R=77	LTR/LTR_unclass	1	189	0	515
1776	0	0	0	scaffold00001	8537228	8537416	-3901111	+	R=77	LTR/LTR_unclass	1	189	0	516
706	8.3	4.4	2.2	scaffold00001	8554617	8554752	-3883775	C	Contig1	simple_repeat	-173	184	46	517
616	7.9	4.6	6.4	scaffold00001	8558830	8559004	-3879523	+	Contig1	simple_repeat	126	297	-60	518
1410	10	4.7	0.5	scaffold00001	8575491	8575701	-3862826	C	R=8	DNA/TcMar	0	220	1	519
837	32.1	0	0.3	scaffold00001	8587105	8587413	-3851114	C	R=2	TE/TE_unclass	-173	760	453	520
743	32.6	2.6	5.3	scaffold00001	8587384	8587769	-3850758	+	R=2	TE/TE_unclass	552	927	-6	521		*
251	7.6	3.4	10.9	scaffold00001	8600995	8601053	-3837474	+	Contig1	simple_repeat	117	171	-186	522
253	19.2	4.8	3.9	scaffold00001	8601140	8601242	-3837285	C	Contig1	simple_repeat	-181	176	73	523
290	9.1	0	0	scaffold00001	8604130	8604217	-3834310	+	Contig1	simple_repeat	270	357	0	524
762	12.4	29.3	2	scaffold00001	8604769	8604956	-3833571	+	R=44	TE/TE_unclass	1	239	-8	525
301	0	0	0	scaffold00001	8663766	8663848	-3774679	C	Contig1	simple_repeat	0	357	275	526
255	0	0	0	scaffold00001	8669506	8669535	-3768992	+	R=10	DNA/hAT	1	30	-492	527		*
510	14.7	7.4	0	scaffold00001	8669525	8669619	-3768908	C	R=10	DNA/hAT	-420	102	1	528
454	16.9	0	0	scaffold00001	8671105	8671187	-3767340	C	R=183	TE/TE_unclass	0	83	1	529
2049	14.3	22.2	0	scaffold00001	8706978	8707404	-3731123	+	R=10	DNA/hAT	1	522	0	530
1152	17.2	0	0.5	scaffold00001	8707459	8707668	-3730859	C	R=45	DNA/DNA_unclass	0	210	2	531
6469	2	0	0	scaffold00001	8712271	8712984	-3725543	+	R=69	TE/TE_unclass	1	714	0	532
1249	15.3	5.1	2.5	scaffold00001	8735662	8735895	-3702632	+	R=44	TE/TE_unclass	1	240	-7	533
1423	15.1	0.4	2.5	scaffold00001	8740516	8740760	-3697767	+	R=44	TE/TE_unclass	1	240	-7	534
412	25.6	10.3	0.7	scaffold00001	8774038	8774163	-3664364	C	R=38	DNA/DNA_unclass	0	138	1	535
1101	4.8	0	3.4	scaffold00001	8777739	8777890	-3660637	+	R=44	TE/TE_unclass	101	247	0	536
227	20.1	0	6	scaffold00001	8787266	8787318	-3651209	+	R=21	LTR/Gypsy	1061	1110	-7549	537
2248	13.9	0.9	0.6	scaffold00001	8820781	8821128	-3617399	+	R=29	DNA/DNA_unclass	1	349	-15	538
772	5.3	6.5	1.2	scaffold00001	8822854	8823006	-3615521	+	Contig1	simple_repeat	57	217	-140	539
357	25	3.4	0	scaffold00001	8841631	8841718	-3596809	C	R=25	DNA/TcMar	-73	91	1	540
2075	0	0	10.4	scaffold00001	8854314	8854590	-3583937	+	R=165	TE/TE_unclass	1	251	0	541
694	3	0.9	8.8	scaffold00001	8854885	8854994	-3583533	C	R=165	TE/TE_unclass	-149	102	1	542
276	16.8	1.3	9.6	scaffold00001	8855082	8855160	-3583367	C	R=79	DNA/Mutatorlike	-399	477	405	543
233	5	2.4	2.4	scaffold00001	8855639	8855679	-3582848	+	R=40	TE/TE_unclass	31	71	0	544
3100	0.3	0	0	scaffold00001	8856395	8856726	-3581801	C	R=46	DNA/TcMar	0	424	93	545
1945	2.3	0	0	scaffold00001	8856727	8856942	-3581585	+	R=146	TE/TE_unclass	1	216	-2	546
1114	18.8	7.1	1.6	scaffold00001	8857001	8857238	-3581289	+	R=79	DNA/Mutatorlike	229	479	-397	547
905	4.9	0.8	2.4	scaffold00001	8857320	8857445	-3581082	+	R=55	TE/TE_unclass	1	124	0	548
21515	0.2	0	1.3	scaffold00001	8858412	8860756	-3577771	+	Contig22_R=324_R=244	DNA/TcMar-Tc4	1	2314	0	549
707	1.3	0	0	scaffold00001	8861735	8861811	-3576716	+	R=314_contig27_R=228_R=177_R=37	DNA/hAT	742	818	0	550
728	18.7	6.2	1.1	scaffold00001	8861897	8862074	-3576453	+	R=10	DNA/hAT	336	522	0	551
330	0	0	0	scaffold00001	8865893	8865927	-3572600	C	R=74	TE/TE_unclass	0	95	61	552
240	8.3	0	20	scaffold00001	8865955	8866014	-3572513	C	R=17_R=154	LTR/LTR_unclass	-308	432	383	553
848	2.1	0	0	scaffold00001	8866116	8866210	-3572317	+	R=74	TE/TE_unclass	1	95	0	554
609	5.8	1.1	5.7	scaffold00001	8866268	8866352	-3572175	C	R=55	TE/TE_unclass	-1	123	43	555
345	0	0	0	scaffold00001	8866353	8866389	-3572138	C	R=14	DNA/TcMar	0	253	217	556
6795	32.8	3.5	2.7	scaffold00001	8872714	8876825	-3561702	C	Contig28	LTR/Copia	0	4220	1314	557
1674	21.5	4.7	2.3	scaffold00001	8877167	8877296	-3561231	C	Contig28	LTR/Copia	-3195	1025	886	558
3829	0.2	0	0.2	scaffold00001	8877297	8877710	-3560817	+	R=95	LTR/LTR_unclass	1	413	0	559
958	0	0	0	scaffold00001	8877930	8878031	-3560496	C	R=193	TE/TE_unclass	0	102	1	560
575	10.4	14.6	0	scaffold00001	8878334	8878422	-3560105	+	Contig19	DNA/TcMar	1	103	-229	561
416	16.2	0	0	scaffold00001	8878423	8878490	-3560037	C	R=79	DNA/Mutatorlike	-1	875	808	562		*
1867	1	0	0	scaffold00001	8878490	8878696	-3559831	+	Contig19	DNA/TcMar	126	332	0	563
690	8.9	0	0	scaffold00001	8878766	8878855	-3559672	C	R=146	TE/TE_unclass	-128	90	1	564
226	17.8	0	12.3	scaffold00001	8879156	8879219	-3559308	C	R=55	TE/TE_unclass	0	124	68	565
1776	1.8	1.4	0	scaffold00001	8879387	8879604	-3558923	+	Contig17	RC/Helitron	1	221	-261	566
1297	0	0	0	scaffold00001	8889881	8890027	-3548500	+	Contig17	RC/Helitron	336	482	0	567
3261	0	0	0.8	scaffold00001	8890124	8890482	-3548045	C	R=109_contig5	DNA/hAT	0	356	1	568
596	15.2	0	11.2	scaffold00001	8891334	8891452	-3547075	+	Contig19	DNA/TcMar	1	107	-225	569
358	19.4	15.2	0.9	scaffold00001	8891659	8891757	-3546770	+	R=101_R=84	DNA/DNA_unclass	1	113	-460	570
237	5.8	3.2	18.2	scaffold00001	8891756	8891818	-3546709	+	R=17_R=154	LTR/LTR_unclass	358	412	-328	571		*
1452	18.1	2.1	5	scaffold00001	8891767	8892098	-3546429	C	R=101_R=84	DNA/DNA_unclass	-250	323	1	572
312	36.5	0.9	0.9	scaffold00001	8895197	8895406	-3543121	+	R=212	LTR/Copia	1335	1544	-2909	573
267	23.3	7.2	7.2	scaffold00001	8895371	8895467	-3543060	C	Contig28	LTR/Copia	-38	4182	4086	574		*
992	4.1	0.8	0.8	scaffold00001	8898794	8898915	-3539612	C	Contig33_R=163	TE/TE_unclass	0	252	131	575
787	9.8	1.8	0	scaffold00001	8898924	8899035	-3539492	C	Contig12	DNA/TcMar	-306	114	1	576
585	5.6	0	0	scaffold00001	8899076	8899146	-3539381	C	R=40	TE/TE_unclass	0	71	1	577
769	11.9	1.7	0	scaffold00001	8899279	8899396	-3539131	+	R=79	DNA/Mutatorlike	252	371	-505	578
2254	2.3	2.3	0	scaffold00001	8899537	8899797	-3538730	C	Contig9_R=103	LTR/LTR_unclass	-71	268	2	579
972	6.5	0	0	scaffold00001	8900011	8900134	-3538393	C	R=55	TE/TE_unclass	0	124	1	580
469	5.2	0	0	scaffold00001	8900380	8900437	-3538090	C	Contig19	DNA/TcMar	0	332	275	581
342	24.9	6	6.5	scaffold00001	8900815	8900999	-3537528	+	Contig19	DNA/TcMar	149	332	0	582		*
1056	7.9	0	0	scaffold00001	8900864	8901002	-3537525	C	R=20	TE/TE_unclass	0	139	1	583
333	8.2	0	0.7	scaffold00001	8931585	8931720	-3506807	+	Contig1	simple_repeat	221	355	-2	584
261	14.3	0	0	scaffold00001	8939677	8939760	-3498767	+	Contig1	simple_repeat	33	116	-241	585
532	0.4	0.7	1.5	scaffold00001	8957205	8957377	-3481150	C	Contig1	simple_repeat	0	357	213	586
247	15.4	1.4	2.8	scaffold00001	9023739	9023810	-3414717	C	R=132_R=153	LTR/LTR_unclass	-52	423	338	587
277	24.4	3.8	4.5	scaffold00001	9045559	9045691	-3392836	C	R=44	TE/TE_unclass	-3	244	113	588
273	28.2	4.4	5	scaffold00001	9072804	9072986	-3365541	C	R=191	LTR/Copia	-2967	1633	1452	589
242	22.2	0	8.8	scaffold00001	9073468	9073541	-3364986	C	R=256_R=291_R=305_R=277	LTR/Copia	-5222	1004	937	590
18794	0.1	0	0	scaffold00001	9075800	9077794	-3360733	C	Contig22_R=324_R=244	DNA/TcMar-Tc4	-319	1995	1	591
493	8.4	6.7	2.9	scaffold00001	9091020	9091154	-3347373	C	Contig1	simple_repeat	-165	192	53	592
241	15.1	1.1	1.1	scaffold00001	9121918	9122004	-3316523	+	Contig1	simple_repeat	36	122	-235	593
525	9.2	1.3	0	scaffold00001	9126547	9126622	-3311905	C	Contig17	RC/Helitron	-33	449	373	594
519	15.5	31	0	scaffold00001	9126677	9126850	-3311677	C	R=102	TE/TE_unclass	0	280	53	595
355	26.8	3.8	7.8	scaffold00001	9134220	9134405	-3304122	C	R=8	DNA/TcMar	-41	179	1	596
232	22.8	7.5	2	scaffold00001	9190303	9190396	-3248131	C	Contig21	DNA/TcMar-Tc1	-186	1212	1114	597
305	19.8	8.6	0	scaffold00001	9242200	9242361	-3196166	+	R=11	DNA/hAT	490	665	-4053	598
1009	28.8	0.6	1.8	scaffold00001	9249724	9250059	-3188468	C	R=2	TE/TE_unclass	-171	762	431	599
427	34.9	4.7	5.1	scaffold00001	9249885	9250201	-3188326	+	R=2	TE/TE_unclass	433	748	-185	599		*
486	16.7	1.2	0	scaffold00001	9272617	9272700	-3165827	+	R=13	LTR/LTR_unclass	1	85	-4	600
328	5	0	0	scaffold00001	9281407	9281446	-3157081	C	R=30	DNA/TcMar	-57	40	1	601
415	14.2	4.9	2.4	scaffold00001	9291746	9291868	-3146659	+	Contig1	simple_repeat	134	259	-98	602
578	14.1	6.6	2.3	scaffold00001	9293121	9293287	-3145240	C	Contig1	simple_repeat	-129	228	55	603
1840	14.2	7.3	0.6	scaffold00001	9355663	9356002	-3082525	+	R=29	DNA/DNA_unclass	1	363	-1	604
687	28.1	2.2	0.4	scaffold00001	9374031	9374262	-3064265	C	R=2	TE/TE_unclass	-202	731	496	605		*
776	30.4	0	0.4	scaffold00001	9374164	9374424	-3064103	+	R=2	TE/TE_unclass	437	696	-237	606
80192	0.1	0	0	scaffold00001	9432321	9440978	-2997549	C	R=21	LTR/Gypsy	0	8659	1	607
1161	0.6	1.6	4.3	scaffold00001	9452306	9452495	-2986032	C	Contig1	simple_repeat	-155	202	18	608
370	0	0	0	scaffold00001	9457608	9457647	-2980880	C	R=14	DNA/TcMar	0	253	214	609
265	13.3	2.2	0	scaffold00001	9473652	9473696	-2964831	C	R=109_contig5	DNA/hAT	-310	46	1	610
245	15.6	2.2	0	scaffold00001	9482396	9482440	-2956087	C	R=109_contig5	DNA/hAT	-310	46	1	611
1831	21.4	2.7	1.2	scaffold00001	9489263	9489664	-2948863	C	R=39	DNA/DNA_unclass	0	418	11	612
1760	1	0.5	0	scaffold00001	9524707	9524901	-2913626	+	Contig10_fl_Contig13	DNA/TcMar-Mariner	1	196	-1092	613		*
3122	3	1.4	0.3	scaffold00001	9524879	9525248	-2913279	+	Contig10_fl_Contig13	DNA/TcMar-Mariner	915	1288	0	614
585	18.6	2.1	5.1	scaffold00001	9536323	9536464	-2902063	C	R=38	DNA/DNA_unclass	0	138	1	615
240	20.8	0	0	scaffold00001	9546699	9546746	-2891781	C	R=44	TE/TE_unclass	0	247	200	616
1209	11.4	0.5	1.6	scaffold00001	9565692	9565887	-2872640	C	R=58	RC/Helitron	0	194	1	617
405	13	1.4	0	scaffold00001	9702316	9702384	-2736143	+	R=40	TE/TE_unclass	2	71	0	618
2218	3.5	0.3	2.1	scaffold00001	9736073	9736363	-2702164	C	Contig15_fr	DNA/TcMar-Tc1	0	501	216	619
2051	3.2	0	0	scaffold00001	9736383	9736635	-2701892	+	R=14	DNA/TcMar	1	253	0	620
721	5.3	7.9	1.2	scaffold00001	9776041	9776192	-2662335	+	Contig1	simple_repeat	125	286	-71	621
256	13	0	0	scaffold00001	9796624	9796669	-2641858	C	R=44	TE/TE_unclass	-8	239	194	622
284	30.1	0	0	scaffold00001	9796880	9796972	-2641555	C	R=44	TE/TE_unclass	-120	127	35	623
1814	7.8	0	0	scaffold00001	9797006	9797250	-2641277	+	R=44	TE/TE_unclass	1	245	-2	624
871	25.6	1.8	1.5	scaffold00001	9805070	9805342	-2633185	C	R=2	TE/TE_unclass	-207	726	453	625
592	31.3	0	0	scaffold00001	9805314	9805495	-2633032	+	R=2	TE/TE_unclass	553	734	-199	626		*
379	1.9	0	0	scaffold00001	9831401	9831504	-2607023	C	Contig1	simple_repeat	-253	104	1	627
1372	24.9	1.4	1.4	scaffold00001	9876769	9877130	-2561397	+	R=29	DNA/DNA_unclass	1	362	-2	628
1640	17.4	6.1	1.1	scaffold00001	9879445	9879786	-2558741	+	R=29	DNA/DNA_unclass	4	362	-2	629
292	12.6	0	0.2	scaffold00001	9900146	9900234	-2538293	C	R=11	DNA/hAT	-4034	684	597	630
870	2.8	1.9	0	scaffold00001	9996372	9996478	-2442049	+	R=38	DNA/DNA_unclass	1	109	-29	631
290	0	0	0	scaffold00001	10027588	10027672	-2410855	+	Contig1	simple_repeat	2	86	-271	632
910	29.5	0.6	1	scaffold00001	10055173	10055487	-2383040	C	R=2	TE/TE_unclass	-194	739	426	633
424	32.9	5.4	5.7	scaffold00001	10055311	10055607	-2382920	+	R=2	TE/TE_unclass	435	730	-203	633		*
545	17.9	23.4	3.5	scaffold00001	10080708	10080975	-2357552	C	Contig9_R=103	LTR/LTR_unclass	0	339	19	634
1876	1.7	2.2	0	scaffold00001	10093289	10093519	-2345008	+	R=78	LTR/LTR_unclass	1	236	0	635
245	20.6	6.2	1.5	scaffold00001	10093520	10093551	-2344976	+	R=21	LTR/Gypsy	185	219	-8440	636
1818	32.4	0.4	0.6	scaffold00001	10095323	10096049	-2342478	+	R=21	LTR/Gypsy	1977	2702	-5957	637
2772	32.1	3.9	3.3	scaffold00001	10096400	10098363	-2340164	+	R=21	LTR/Gypsy	3049	5024	-3635	637
1876	1.7	2.2	0	scaffold00001	10102296	10102526	-2336001	+	R=78	LTR/LTR_unclass	1	236	0	638
262	22.3	0.8	0	scaffold00001	10132071	10132200	-2306327	C	Contig1	simple_repeat	-5	352	222	639
401	1.8	0	0	scaffold00001	10166565	10166675	-2271852	C	Contig1	simple_repeat	-246	111	1	640
854	28.9	1.3	2.3	scaffold00001	10187567	10187878	-2250649	C	R=2	TE/TE_unclass	-194	739	431	641
590	33.8	0.4	0.9	scaffold00001	10187825	10188054	-2250473	+	R=2	TE/TE_unclass	553	781	-152	642		*
1197	0	1	4.3	scaffold00001	10190713	10190905	-2247622	C	Contig1	simple_repeat	-168	189	3	643
2326	10.3	0.5	6.6	scaffold00001	10193390	10193775	-2244752	C	R=29	DNA/DNA_unclass	0	364	1	644
867	28.9	1.3	2.3	scaffold00001	10217628	10217939	-2220588	C	R=2	TE/TE_unclass	-194	739	431	645
604	32.9	3.4	4.3	scaffold00001	10217766	10218115	-2220412	+	R=2	TE/TE_unclass	435	781	-152	646		*
322	0.9	0	0	scaffold00001	10240615	10240727	-2197800	+	Contig1	simple_repeat	1	113	-244	647
50760	0	0	0	scaffold00001	10276771	10282245	-2156282	C	Contig23fr	LTR/Gypsy	0	5475	1	648
1811	0	0	0	scaffold00001	10284814	10285007	-2153520	C	Contig23fr	LTR/Gypsy	0	5475	5282	649
479	0	0	0	scaffold00001	10293369	10293420	-2145107	+	R=14	DNA/TcMar	202	253	0	650
3985	1.1	4.6	0	scaffold00001	10293508	10293968	-2144559	C	Contig17	RC/Helitron	0	482	1	651
1660	0	0	0	scaffold00001	10299389	10299574	-2138953	+	R=152	LTR/LTR_unclass	1	186	0	652
1370	8.1	0	1.1	scaffold00001	10344051	10344238	-2094289	C	R=152	LTR/LTR_unclass	0	186	1	653
12349	0	0	0	scaffold00001	10346725	10348122	-2090405	+	Contig21	DNA/TcMar-Tc1	1	1398	0	654
1188	0.6	2.2	1.6	scaffold00001	10352085	10352268	-2086259	+	Contig1	simple_repeat	22	206	-151	655
16697	0	0	0	scaffold00001	10375165	10377095	-2061432	C	Contig30	LTR/Copia	0	2501	571	656
234	32.8	0	2.4	scaffold00001	10402719	10402846	-2035681	C	R=11	DNA/hAT	-3996	722	598	657
589	8.1	5.2	3.2	scaffold00001	10448612	10448765	-1989762	+	Contig1	simple_repeat	135	291	-66	658
983	2.2	3.9	1.1	scaffold00001	10466433	10466614	-1971913	C	Contig1	simple_repeat	-145	212	26	659
228	21.3	3.2	3.2	scaffold00001	10527809	10527871	-1910656	+	R=25	DNA/TcMar	102	164	0	660
408	21.6	2	2	scaffold00001	10544542	10544640	-1893887	+	Contig2	LTR/LTR_unclass	3	101	-95	661
1085	10.9	1.9	0	scaffold00001	10544750	10544905	-1893622	+	R=58	RC/Helitron	1	159	-35	662
674	20.8	6.2	0	scaffold00001	10544933	10545076	-1893451	C	Contig12	DNA/TcMar	0	420	268	663
388	11.9	5.1	0	scaffold00001	10545143	10545201	-1893326	+	R=40	TE/TE_unclass	10	71	0	664
290	21.2	3.6	3.6	scaffold00001	10563576	10563658	-1874869	+	R=69	TE/TE_unclass	360	442	-272	665
574	7.4	1.2	0	scaffold00001	10603445	10603523	-1835004	C	Contig15_fr	DNA/TcMar-Tc1	0	501	422	666
1437	10.2	1.5	0	scaffold00001	10603524	10603729	-1834798	+	R=45	DNA/DNA_unclass	2	210	0	667
1025	6.9	1.3	2.7	scaffold00001	10603730	10603877	-1834650	C	Contig15_fr	DNA/TcMar-Tc1	-82	419	274	666
603	13.7	0	1.1	scaffold00001	10609422	10609517	-1829010	C	R=26	DNA/TcMar-Tc1	-9	1652	1558	668
2300	10.9	4.3	0.8	scaffold00001	10609619	10609970	-1828557	C	R=29	DNA/DNA_unclass	0	364	1	669
2113	14.8	1.4	3	scaffold00001	10621967	10622336	-1816191	C	R=29	DNA/DNA_unclass	0	364	1	670
307	7.3	2.4	0	scaffold00001	10640842	10640882	-1797645	+	Contig15_fr	DNA/TcMar-Tc1	460	501	0	671
922	16.1	8.4	2	scaffold00001	10649692	10649881	-1788646	+	R=120	TE/TE_unclass	1	202	0	672
574	31.7	1	0.5	scaffold00001	10649882	10650081	-1788446	C	R=101_R=84	DNA/DNA_unclass	-5	568	368	673
534	15.5	0	0	scaffold00001	10650107	10650190	-1788337	C	Contig2	LTR/LTR_unclass	-101	95	12	674
681	19.9	0.7	0.7	scaffold00001	10653183	10653324	-1785203	+	R=39	DNA/DNA_unclass	30	171	-247	675
7706	0	0	0	scaffold00001	10672185	10673002	-1765525	+	R=314_contig27_R=228_R=177_R=37	DNA/hAT	1	818	0	676
2511	11.1	0.8	0.3	scaffold00001	10673989	10674350	-1764177	C	R=29	DNA/DNA_unclass	0	364	1	677
801	13.8	0	0	scaffold00001	10675067	10675196	-1763331	+	R=8	DNA/TcMar	86	215	-5	678
320	0	3.8	0.7	scaffold00001	10706176	10706308	-1732219	+	Contig1	simple_repeat	221	357	0	679
261	22.2	0	0	scaffold00001	10709666	10709719	-1728808	C	R=44	TE/TE_unclass	0	247	194	680
301	0	0	0	scaffold00001	10712211	10712289	-1726238	C	Contig1	simple_repeat	-277	80	2	681
341	4	0	0	scaffold00001	10730597	10730695	-1707832	C	Contig1	simple_repeat	-237	120	22	682
1295	13.3	4.8	0	scaffold00001	10735664	10735873	-1702654	C	R=8	DNA/TcMar	0	220	1	683
2209	0.8	0.4	0	scaffold00001	10778984	10779228	-1659299	+	R=11	DNA/hAT	1	246	-4472	684
2016	0.5	0	0	scaffold00001	10779222	10779438	-1659089	+	R=11	DNA/hAT	4502	4718	0	685		*
305	19.4	0	1.6	scaffold00001	10779683	10779745	-1658782	C	R=44	TE/TE_unclass	-185	62	1	686
958	17.3	1.1	1.1	scaffold00001	10804869	10805043	-1633484	+	R=191	LTR/Copia	9	183	-4417	687
230	12.2	0	0	scaffold00001	10876496	10876536	-1561991	C	R=132_R=153	LTR/LTR_unclass	-71	404	364	688
301	32.7	3.8	2.6	scaffold00001	10895805	10896068	-1542459	C	R=69	TE/TE_unclass	-307	407	141	689
794	14.2	2.2	0.7	scaffold00001	10976364	10976498	-1462029	C	R=38	DNA/DNA_unclass	-1	137	1	690
234	19.3	0	10.3	scaffold00001	11009914	11009988	-1428539	C	R=11	DNA/hAT	-4165	553	486	691
827	7.8	3	10.2	scaffold00001	11049073	11049419	-1389108	+	Contig1	simple_repeat	114	304	-53	692
2278	14.8	1.4	2.9	scaffold00001	11059525	11059948	-1378579	C	R=39	DNA/DNA_unclass	0	418	1	693
269	25.9	5.8	5.8	scaffold00001	11068448	11068672	-1369855	+	R=11	DNA/hAT	490	714	-4004	694
264	2.7	0	0	scaffold00001	11106879	11106951	-1331576	+	Contig1	simple_repeat	1	73	-284	695
804	29.7	0.9	1.8	scaffold00001	11115531	11115869	-1322658	C	R=2	TE/TE_unclass	-171	762	427	696
834	29.8	1.1	2.3	scaffold00001	11117081	11117430	-1321097	C	R=2	TE/TE_unclass	-161	772	427	697
327	16.4	3.4	9.6	scaffold00001	11145175	11145262	-1293265	C	R=146	TE/TE_unclass	-135	83	1	698
805	0	0	0	scaffold00001	11218796	11218886	-1219641	C	Contig30	LTR/Copia	-2274	227	137	699
16965	0.1	0	0	scaffold00001	11220973	11222909	-1215618	C	Contig30	LTR/Copia	0	2501	565	700
4966	0	0	0.7	scaffold00001	11223251	11223825	-1214702	C	Contig30	LTR/Copia	-1930	571	1	700
752	2.8	6.1	4	scaffold00001	11250533	11250679	-1187848	C	Contig1	simple_repeat	-152	205	56	701
499	7.3	0.6	0.9	scaffold00001	11253804	11253965	-1184562	C	Contig1	simple_repeat	0	357	216	702
773	30.2	0.7	1.6	scaffold00001	11270881	11271190	-1167337	C	R=2	TE/TE_unclass	-200	733	427	703
551	33.1	1.6	0.4	scaffold00001	11271966	11272220	-1166307	+	R=2	TE/TE_unclass	460	717	-216	704
793	28.1	3.1	4.3	scaffold00001	11308851	11309200	-1129327	C	R=2	TE/TE_unclass	-161	772	427	705
2842	0	0	0	scaffold00001	11310773	11311092	-1127435	+	R=207	DNA/DNA_unclass	1	320	0	706
1168	18.1	11.7	2.1	scaffold00001	11363283	11363547	-1074980	C	R=39	DNA/DNA_unclass	-128	290	1	707
430	12.7	11.4	0	scaffold00001	11429691	11429769	-1008758	C	R=13	LTR/LTR_unclass	-1	88	1	708
1582	0	0	3.4	scaffold00001	11487818	11488052	-950475	C	Contig1	simple_repeat	-53	304	114	709
3249	3.5	0.3	0	scaffold00001	11529027	11529402	-909125	C	R=7	DNA/DNA_unclass	0	377	1	710
320	35.5	3.2	2.2	scaffold00001	11539833	11540140	-898387	C	R=69	TE/TE_unclass	-288	426	116	711
1090	2.5	0	4.3	scaffold00001	11542122	11542291	-896236	C	Contig1	simple_repeat	-151	206	44	712
906	27.9	1.2	2.1	scaffold00001	11550164	11550500	-888027	C	R=2	TE/TE_unclass	-173	760	427	713
503	27	1.4	7	scaffold00001	11550443	11550653	-887874	+	R=2	TE/TE_unclass	552	751	-182	714		*
2425	12.2	1.1	0.3	scaffold00001	11582266	11582626	-855901	C	R=29	DNA/DNA_unclass	0	364	1	715
3160	2.4	0	0	scaffold00001	11630246	11630622	-807905	+	R=7	DNA/DNA_unclass	1	377	0	716
355	21.2	1.7	11.2	scaffold00001	11700243	11700359	-738168	C	R=314_contig27_R=228_R=177_R=37	DNA/hAT	-683	135	29	717
918	10.5	3	1.5	scaffold00001	11712101	11712235	-726292	C	R=38	DNA/DNA_unclass	0	138	2	718
654	6	7.6	2.2	scaffold00001	11777329	11777499	-661028	+	Contig1	simple_repeat	115	294	-63	719
371	25	0	0	scaffold00001	11794506	11794593	-643934	C	R=2	TE/TE_unclass	-194	739	652	720
424	10	5.6	3.9	scaffold00001	11819139	11819263	-619264	C	Contig1	simple_repeat	-177	180	54	721
229	26.7	2	5.8	scaffold00001	11841149	11841343	-597184	C	R=11	DNA/hAT	-4046	672	485	722
370	11.5	1.6	0	scaffold00001	11850515	11850575	-587952	C	R=40	TE/TE_unclass	-8	63	2	723
296	12.2	0	0	scaffold00001	11883633	11883673	-554854	C	R=30	DNA/TcMar	-16	81	41	724
386	20.5	12.2	0.7	scaffold00001	11886268	11886314	-552213	C	R=38	DNA/DNA_unclass	-1	137	4	725
471	13.7	0	0	scaffold00001	11886315	11886387	-552140	C	R=30	DNA/TcMar	-24	73	1	726
1447	6.2	0	0	scaffold00001	11957316	11957506	-481021	C	R=14	DNA/TcMar	0	253	63	727
1443	5.3	0	1.1	scaffold00001	11957507	11957697	-480830	C	R=77	LTR/LTR_unclass	0	189	1	728
249	10.2	18.4	0	scaffold00001	11957698	11957744	-480783	C	R=14	DNA/TcMar	-189	64	9	727
535	1.4	0.3	0.5	scaffold00001	11960604	11960871	-477656	+	Contig1	simple_repeat	217	357	0	729
241	11.1	37	0	scaffold00001	11973898	11973978	-464549	C	R=102	TE/TE_unclass	-169	111	1	730
614	21	0	0	scaffold00001	11976292	11976415	-462112	+	R=8	DNA/TcMar	3	126	-94	731
341	11.3	3.2	15.5	scaffold00001	11976514	11976607	-461920	+	Contig17	RC/Helitron	1	84	-398	732
2292	12.3	0.8	0	scaffold00001	11976622	11976980	-461547	+	R=29	DNA/DNA_unclass	1	362	-2	733
1552	10.8	0.4	0.4	scaffold00001	11977045	11977277	-461250	+	R=44	TE/TE_unclass	2	234	-13	734
1555	3.6	1	0	scaffold00001	12019430	12019621	-418906	C	R=58	RC/Helitron	0	194	1	735
1017	15.3	5.1	3.6	scaffold00001	12022110	12022326	-416201	+	R=8	DNA/TcMar	1	220	0	736
1955	17.9	1.4	1.1	scaffold00001	12045428	12045788	-392739	C	R=29	DNA/DNA_unclass	-2	362	1	737
408	22.4	11.9	1.5	scaffold00001	12079326	12079443	-359084	+	R=38	DNA/DNA_unclass	9	138	0	738
1337	22.5	5.8	1.9	scaffold00001	12079513	12079874	-358653	C	R=39	DNA/DNA_unclass	-30	388	13	739
1460	0	0	0	scaffold00001	12080487	12080650	-357877	C	R=25	DNA/TcMar	0	164	1	740
259	24.5	0	5.6	scaffold00001	12134270	12134364	-304163	C	R=44	TE/TE_unclass	-130	117	28	741
250	18.6	1.7	1.7	scaffold00001	12134509	12134568	-303959	C	R=8	DNA/TcMar	-154	66	7	742
887	4.5	0.7	11.8	scaffold00001	12172807	12172956	-265571	+	Contig1	simple_repeat	215	349	-8	743
244	27.9	1.2	3.8	scaffold00001	12174297	12174378	-264149	+	Contig20_fr_R=226_R=288	RC/Helitron	67	146	-5114	744
719	4	0.7	22.7	scaffold00001	12192554	12192778	-245749	C	Contig1	simple_repeat	-136	221	69	745
313	0	0	0	scaffold00001	12202944	12202978	-235549	C	R=74	TE/TE_unclass	0	95	61	746
296	10.2	0	12.9	scaffold00001	12203006	12203084	-235443	C	R=17_R=154	LTR/LTR_unclass	-308	432	363	747
817	2.1	0	0	scaffold00001	12203220	12203314	-235213	+	R=74	TE/TE_unclass	1	95	0	748
261	17.4	0	0	scaffold00001	12246171	12246216	-192311	C	R=30	DNA/TcMar	-51	46	1	749
14780	0.4	0	0	scaffold00001	12260726	12262386	-176141	+	R=26	DNA/TcMar-Tc1	1	1661	0	750
291	18.1	6.7	1.5	scaffold00001	12272207	12272310	-166217	+	R=132_R=153	LTR/LTR_unclass	366	460	-15	751
989	0	0	0	scaffold00001	12282578	12282691	-155836	+	R=52	DNA/TcMar-Tc1	1	114	-1218	752
473	0	0	0	scaffold00001	12282690	12282742	-155785	+	R=52	DNA/TcMar-Tc1	1280	1332	0	753		*
484	12.2	0	0	scaffold00001	12286597	12286670	-151857	+	R=58	RC/Helitron	58	131	-63	754
2150	0	0	0	scaffold00001	12287172	12287424	-151103	C	R=14	DNA/TcMar	0	253	1	755
2669	1.9	0	0	scaffold00001	12287860	12288176	-150351	+	Contig15_fr	DNA/TcMar-Tc1	185	501	0	756
2219	13	0.3	1.9	scaffold00001	12330084	12330451	-108076	+	R=29	DNA/DNA_unclass	1	362	-2	757
865	4.4	0.9	0	scaffold00001	12330713	12330825	-107702	+	R=44	TE/TE_unclass	2	115	-132	758
245	13.2	0	0	scaffold00001	12330877	12330914	-107613	C	R=10	DNA/hAT	-471	51	14	759
923	7.5	0	0	scaffold00001	12330942	12331074	-107453	+	R=44	TE/TE_unclass	107	239	-8	758
925	10.7	0.8	0	scaffold00001	12346741	12346871	-91656	C	R=146	TE/TE_unclass	-86	132	1	760
1957	5.8	0	0.4	scaffold00002	20479	20721	-10478741	C	R=44	TE/TE_unclass	-5	242	1	761
278	9.6	0	1.2	scaffold00002	32572	32655	-10466807	C	Contig1	simple_repeat	-233	124	42	762
452	0	0	11.8	scaffold00002	49574	49649	-10449813	+	Contig1	simple_repeat	154	221	-136	763		*
840	0	1.8	4.6	scaffold00002	49589	49711	-10449751	C	Contig1	simple_repeat	-136	221	114	764		*
1283	4.7	2.1	2.1	scaffold00002	49616	49819	-10449643	+	Contig1	simple_repeat	114	293	-64	765
252	14.3	0	0	scaffold00002	75188	75250	-10424212	C	R=11	DNA/hAT	-4076	642	580	766
347	0	0	0	scaffold00002	85221	85311	-10414151	+	Contig1	simple_repeat	1	91	-266	767
353	4.9	2.2	10.6	scaffold00002	88251	88342	-10411120	C	Contig1	simple_repeat	-159	198	114	768
421	8.5	1	9.4	scaffold00002	92381	92484	-10406978	C	Contig1	simple_repeat	-192	165	70	769
276	14.6	0	0	scaffold00002	106501	106548	-10392914	C	R=38	DNA/DNA_unclass	-89	49	2	770
1255	0	5	0	scaffold00002	123014	123194	-10376268	C	Contig1	simple_repeat	-136	221	32	771
441	4.8	0.8	0	scaffold00002	185459	185584	-10313878	+	Contig1	simple_repeat	220	346	-11	772
2999	3	2.5	0	scaffold00002	216929	217296	-10282166	+	R=7	DNA/DNA_unclass	1	377	0	773
294	19.4	9	0	scaffold00002	219030	219096	-10280366	C	R=193	TE/TE_unclass	-1	101	29	774
524	0.9	0	0	scaffold00002	259170	259333	-10240129	+	Contig1	simple_repeat	218	357	0	775
404	5.3	0	0	scaffold00002	259233	259345	-10240117	C	Contig1	simple_repeat	-243	114	2	776		*
275	4.4	0	2.8	scaffold00002	361267	361376	-10138086	C	Contig1	simple_repeat	-243	114	1	777
329	2.6	5.1	0	scaffold00002	361379	361456	-10138006	+	Contig1	simple_repeat	115	196	-161	778
367	4.8	1.2	0	scaffold00002	361522	361605	-10137857	+	Contig1	simple_repeat	207	291	-66	779
976	0.6	5.3	2.3	scaffold00002	421919	422089	-10077373	C	Contig1	simple_repeat	-145	212	37	780
262	9.8	0	0	scaffold00002	422259	422299	-10077163	C	R=132_R=153	LTR/LTR_unclass	-55	420	380	781
233	22.6	0	0	scaffold00002	474339	474391	-10025071	C	R=44	TE/TE_unclass	0	247	195	782
1116	4.4	0	0	scaffold00002	512700	512835	-9986627	C	R=38	DNA/DNA_unclass	0	138	3	783
246	24.1	0	0	scaffold00002	525504	525557	-9973905	C	R=44	TE/TE_unclass	0	247	194	784
702	1.3	4	11	scaffold00002	532694	532867	-9966595	+	Contig1	simple_repeat	59	221	-136	785
1159	17.3	0.5	0	scaffold00002	619464	619660	-9879802	+	R=8	DNA/TcMar	6	203	-17	786
2979	0	0	0	scaffold00002	625119	625438	-9874024	+	R=207	DNA/DNA_unclass	1	320	0	787
231	6.3	0	3.1	scaffold00002	684287	684319	-9815143	C	Contig10_fl_Contig13	DNA/TcMar-Mariner	0	1288	1257	788
292	34.5	4.3	2.9	scaffold00002	684779	685055	-9814407	+	R=2	TE/TE_unclass	453	733	-200	789
1209	0	3.5	0.6	scaffold00002	700170	700342	-9799120	+	Contig1	simple_repeat	44	221	-136	790
657	10.1	0	0	scaffold00002	722123	722211	-9777251	C	R=13	LTR/LTR_unclass	0	89	1	791
632	11.2	0	0	scaffold00002	722389	722477	-9776985	C	R=13	LTR/LTR_unclass	0	89	1	792
926	1.3	6.3	0	scaffold00002	723408	723565	-9775897	+	Contig1	simple_repeat	44	211	-146	793
297	3.5	0	0.9	scaffold00002	724687	724801	-9774661	+	Contig1	simple_repeat	1	114	-243	794
636	7.4	0	0	scaffold00002	758390	758470	-9740992	+	R=78	LTR/LTR_unclass	1	81	-155	795
416	34.2	3.2	4.9	scaffold00002	767065	767624	-9731838	C	R=134	LTR/Copia	-627	3456	2906	796
429	31.4	9.4	3.1	scaffold00002	767824	768218	-9731244	C	Contig26_fr_R=289_R=204	LTR/Copia	-2556	1654	1236	797
989	4.9	0	0	scaffold00002	770638	770760	-9728702	+	R=55	TE/TE_unclass	1	123	-1	798
1559	34.3	2.3	1.9	scaffold00002	770800	771534	-9727928	+	R=296	LTR/Copia	1517	2254	-1966	799
369	24.3	2.2	7.9	scaffold00002	771592	771725	-9727737	+	R=296	LTR/Copia	2361	2487	-1733	799
5847	7.4	1.4	1.3	scaffold00002	774395	775814	-9723648	+	R=296	LTR/Copia	1	633	0	799
1207	0	0	0	scaffold00002	775815	775945	-9723517	+	R=257	LTR/Copia	1	131	0	800
48462	0	0	0	scaffold00002	779852	784983	-9714479	+	Contig20_fr_R=226_R=288	RC/Helitron	129	5260	0	801
958	6.9	1.9	8.1	scaffold00002	785809	785965	-9713497	+	R=78	LTR/LTR_unclass	1	148	-88	802
319	9.3	0	0	scaffold00002	785947	785989	-9713473	+	R=14	DNA/TcMar	211	253	0	803		*
226	14.3	12.5	0	scaffold00002	823986	824041	-9675421	C	R=132_R=153	LTR/LTR_unclass	-71	404	342	804
530	9.9	1.3	2.6	scaffold00002	825050	825205	-9674257	C	Contig1	simple_repeat	-13	344	191	805
235	18.9	1.4	4.3	scaffold00002	828910	828981	-9670481	C	R=132_R=153	LTR/LTR_unclass	-34	441	372	806
399	8.9	8.9	0	scaffold00002	864894	865050	-9634412	C	Contig1	simple_repeat	-145	212	42	807
231	13	0	0	scaffold00002	867766	867811	-9631651	C	R=132_R=153	LTR/LTR_unclass	-64	411	366	808
515	17.3	13	1.5	scaffold00002	892257	892379	-9607083	C	R=38	DNA/DNA_unclass	-1	137	1	809
952	10.4	12.2	4.1	scaffold00002	895722	895900	-9603562	+	R=44	TE/TE_unclass	1	193	-54	810
1360	11	0.9	0.9	scaffold00002	895901	896111	-9603351	+	R=8	DNA/TcMar	1	211	-9	811
449	31.8	3.6	4.5	scaffold00002	949940	950272	-9549190	C	R=2	TE/TE_unclass	-173	760	431	812		*
931	29.3	0.3	1.8	scaffold00002	950097	950437	-9549025	+	R=2	TE/TE_unclass	434	769	-164	812
260	32.2	3.7	3.7	scaffold00002	967314	967558	-9531904	+	R=256_R=291_R=305_R=277	LTR/Copia	336	580	-5646	813
266	29.4	0	0	scaffold00002	967918	968002	-9531460	+	R=256_R=291_R=305_R=277	LTR/Copia	919	1003	-5223	813
1557	34.6	2.8	3.2	scaffold00002	968091	969359	-9530103	+	R=256_R=291_R=305_R=277	LTR/Copia	1098	2360	-3866	813
4070	31.8	1	1	scaffold00002	969778	971429	-9528033	+	R=256_R=291_R=305_R=277	LTR/Copia	2692	4343	-1883	813
1709	7.4	4	2.4	scaffold00002	987030	987278	-9512184	C	R=14	DNA/TcMar	0	253	1	814
553	7.3	0	0	scaffold00002	987345	987412	-9512050	+	R=40	TE/TE_unclass	3	70	-1	815
1110	11.9	6.8	2.3	scaffold00002	1012482	1012687	-9486775	C	R=14	DNA/TcMar	0	253	39	816
613	3.5	0.8	5.3	scaffold00002	1024771	1024889	-9474573	+	Contig1	simple_repeat	171	284	-73	817
494	0.3	0	18.2	scaffold00002	1038756	1038954	-9460508	+	Contig1	simple_repeat	219	357	0	818
803	1.6	6.8	2.5	scaffold00002	1057104	1057295	-9442167	C	Contig1	simple_repeat	-146	211	12	819
1811	3.7	0.9	0.5	scaffold00002	1077113	1077329	-9422133	+	R=146	TE/TE_unclass	1	218	0	820
1877	0	0	0	scaffold00002	1077375	1077576	-9421886	+	R=120	TE/TE_unclass	1	202	0	821
1877	0	0	0	scaffold00002	1088027	1088228	-9411234	C	R=120	TE/TE_unclass	0	202	1	822
382	29.3	13.4	1	scaffold00002	1096395	1096573	-9402889	+	R=256_R=291_R=305_R=277	LTR/Copia	30	230	-5996	823
17871	2.6	0.1	0.1	scaffold00002	1102062	1104076	-9395386	+	R=256_R=291_R=305_R=277	LTR/Copia	3394	5410	-816	824
2804	1	0	0.6	scaffold00002	1104065	1104378	-9395084	C	R=46	DNA/TcMar	-112	312	1	825		*
3087	2.3	0	0	scaffold00002	1104379	1104721	-9394741	+	R=256_R=291_R=305_R=277	LTR/Copia	5479	5821	-405	824
1318	2.7	0	0	scaffold00002	1104723	1104870	-9394592	+	R=96	LTR/LTR_unclass	2	149	0	826
3889	0	0	0	scaffold00002	1111920	1112332	-9387130	+	R=54_R=322	DNA/TcMar	602	1014	0	827
5305	1.5	0	0	scaffold00002	1112831	1113423	-9386039	C	Contig8	LTR/LTR_unclass	0	593	1	828
253	29	3.3	5.3	scaffold00002	1114546	1114698	-9384764	C	R=191	LTR/Copia	-1236	3364	3215	829
266	39.5	1.5	1.5	scaffold00002	1120618	1120887	-9378575	C	R=134	LTR/Copia	-978	3105	2836	830
319	31.7	5	5	scaffold00002	1121377	1121864	-9377598	C	R=256_R=291_R=305_R=277	LTR/Copia	-4108	2118	1891	831
621	0	0	0	scaffold00002	1121903	1121971	-9377491	+	Contig8	LTR/LTR_unclass	1	69	-524	832
993	13.4	18.4	1.1	scaffold00002	1125977	1126209	-9373253	+	R=181_R=62	LTR/LTR_unclass	1	273	0	833
390	23.8	2.9	1.9	scaffold00002	1130160	1130262	-9369200	+	R=256_R=291_R=305_R=277	LTR/Copia	11	114	-6112	834
1163	8.9	0.6	0.6	scaffold00002	1142153	1142322	-9357140	C	Contig15_fr	DNA/TcMar-Tc1	0	501	332	835
827	5.8	11.6	0	scaffold00002	1142336	1142456	-9357006	+	R=14	DNA/TcMar	119	253	0	836
241	13.3	0	0	scaffold00002	1184311	1184355	-9315107	+	R=132_R=153	LTR/LTR_unclass	366	410	-65	837
268	8.3	0	0	scaffold00002	1217436	1217471	-9281991	+	R=38	DNA/DNA_unclass	103	138	0	838
249	9.2	0	11.4	scaffold00002	1230930	1230978	-9268484	C	R=38	DNA/DNA_unclass	0	138	95	839
341	20	1.5	0	scaffold00002	1231163	1231177	-9268285	C	R=38	DNA/DNA_unclass	-72	66	4	839
346	10.6	0	0	scaffold00002	1231178	1231224	-9268238	C	R=30	DNA/TcMar	-50	47	1	840
1142	1.9	3.1	0.6	scaffold00002	1246783	1246941	-9252521	+	Contig1	simple_repeat	54	216	-141	841
601	2	7.7	2.3	scaffold00002	1271613	1271820	-9227642	C	Contig1	simple_repeat	-6	351	133	842
44533	0	0	0	scaffold00002	1281337	1286054	-9213408	C	R=11	DNA/hAT	0	4718	1	843
242	17.9	0	0	scaffold00002	1337169	1337207	-9162255	+	R=30	DNA/TcMar	1	39	-58	844
1969	9.4	11.9	0	scaffold00002	1338901	1339218	-9160244	+	R=109_contig5	DNA/hAT	1	356	0	845
598	17.5	0	0	scaffold00002	1343861	1343957	-9155505	+	R=30	DNA/TcMar	1	97	0	846
522	20.3	3	3	scaffold00002	1343958	1343989	-9155473	+	R=38	DNA/DNA_unclass	4	132	-6	847
271	18.5	3.4	21.1	scaffold00002	1360938	1361026	-9138436	+	Contig22_R=324_R=244	DNA/TcMar-Tc4	2023	2098	-216	848
233	16.1	0	5.8	scaffold00002	1389548	1389692	-9109770	C	Contig1	simple_repeat	0	357	221	849
426	26.1	2	4.1	scaffold00002	1437544	1437691	-9061771	+	R=8	DNA/TcMar	51	195	-25	850
267	6.7	0	0	scaffold00002	1458732	1458791	-9040671	+	Contig1	simple_repeat	65	124	-233	851
1585	0.6	0	0	scaffold00002	1497635	1497814	-9001648	+	R=93	LTR/LTR_unclass	1	180	0	852
244	27.8	2	1	scaffold00002	1502168	1502265	-8997197	C	R=2	TE/TE_unclass	-399	534	436	853
304	14.5	22.4	0	scaffold00002	1544135	1544210	-8955252	+	Contig17	RC/Helitron	390	482	0	854
283	13.7	0	0	scaffold00002	1545473	1545523	-8953939	+	Contig17	RC/Helitron	355	405	-77	855
226	29.9	2	1	scaffold00002	1580771	1580868	-8918594	C	R=2	TE/TE_unclass	-399	534	436	856
594	0	0	0	scaffold00002	1587494	1587559	-8911903	C	Contig1	simple_repeat	-177	180	115	857
546	0.2	0	1.6	scaffold00002	1598771	1599052	-8900410	+	Contig1	simple_repeat	216	357	0	858
252	2.6	1.3	1.3	scaffold00002	1602411	1602487	-8896975	C	Contig1	simple_repeat	-242	115	39	859
841	0.7	1.3	5.3	scaffold00002	1602509	1602793	-8896669	+	Contig1	simple_repeat	121	357	0	860
602	5	0	3.8	scaffold00002	1617048	1617130	-8882332	C	R=44	TE/TE_unclass	-167	80	1	861
6563	0.3	0.7	0	scaffold00002	1657044	1657752	-8841710	C	R=69	TE/TE_unclass	0	714	1	862
1710	3.1	0	0	scaffold00002	1657974	1658169	-8841293	C	Contig2	LTR/LTR_unclass	0	196	1	863
463	0	0	0	scaffold00002	1658209	1658258	-8841204	C	Contig20_fr_R=226_R=288	RC/Helitron	0	5260	5211	864
1926	0	2.3	0	scaffold00002	1658259	1658474	-8840988	+	R=107	LTR/LTR_unclass	1	221	0	865
589	36.9	1.5	2.1	scaffold00002	1661374	1661897	-8837565	+	R=134	LTR/Copia	2981	3501	-582	866
2359	6.3	0	0	scaffold00002	1662141	1662443	-8837019	+	R=97_R=61	LTR/LTR_unclass	69	371	0	867
250	16	2.7	5.6	scaffold00002	1663415	1663487	-8835975	+	R=256_R=291_R=305_R=277	LTR/Copia	937	1007	-5219	868
264	30.9	4.5	4.5	scaffold00002	1664351	1664646	-8834816	+	Contig28	LTR/Copia	3275	3516	-704	869
1029	33.2	4.7	4.3	scaffold00002	1665354	1666614	-8832848	+	R=134	LTR/Copia	2815	4080	-3	870
2359	6.3	0	0	scaffold00002	1671163	1671465	-8827997	+	R=97_R=61	LTR/LTR_unclass	69	371	0	871
3885	0.7	0	0	scaffold00002	1676547	1676968	-8822494	C	R=81_R=128_R=158	LTR/LTR_unclass	-87	422	1	872
915	32.9	2.9	3.4	scaffold00002	1680621	1681268	-8818194	C	R=256_R=291_R=305_R=277	LTR/Copia	-2035	4191	3547	873
993	33	3.7	4.6	scaffold00002	1681426	1682152	-8817310	C	R=256_R=291_R=305_R=277	LTR/Copia	-2828	3398	2678	873
521	35.7	3.5	3.9	scaffold00002	1682637	1683456	-8816006	C	R=191	LTR/Copia	-2328	2272	1456	874
247	21.2	11.8	0	scaffold00002	1683940	1684024	-8815438	C	R=256_R=291_R=305_R=277	LTR/Copia	-5228	998	904	875
3808	0.2	0	0	scaffold00002	1684841	1685248	-8814214	C	R=81_R=128_R=158	LTR/LTR_unclass	0	509	102	876
981	0.9	0	0	scaffold00002	1691138	1691243	-8808219	C	R=81_R=128_R=158	LTR/LTR_unclass	-403	106	1	876
471	3.6	0	0	scaffold00002	1692239	1692293	-8807169	+	R=81_R=128_R=158	LTR/LTR_unclass	455	509	0	877
599	4.1	0	0	scaffold00002	1692717	1692789	-8806673	+	R=17_R=154	LTR/LTR_unclass	2	74	-666	878
450	1.9	0	1.9	scaffold00002	1700446	1700500	-8798962	C	R=17_R=154	LTR/LTR_unclass	0	740	687	879
717	7.8	1	0	scaffold00002	1710684	1710786	-8788676	C	R=55	TE/TE_unclass	-1	123	20	880
227	26.4	6.9	0	scaffold00002	1710862	1710933	-8788529	C	R=193	TE/TE_unclass	0	102	26	881
238	29.7	4.8	1.9	scaffold00002	1711355	1711457	-8788005	+	R=54_R=322	DNA/TcMar	194	299	-715	882
614	25.7	1.4	0	scaffold00002	1711504	1711647	-8787815	+	R=191	LTR/Copia	2129	2274	-2326	883
233	12	0	18.6	scaffold00002	1712280	1712330	-8787132	+	Contig28	LTR/Copia	915	957	-3263	884
314	29.9	2.8	2.8	scaffold00002	1714566	1714706	-8784756	+	Contig28	LTR/Copia	3302	3442	-778	885
501	30.5	5.3	5.3	scaffold00002	1715556	1716098	-8783364	+	R=191	LTR/Copia	2942	3364	-1236	886
624	34.2	3.6	5.5	scaffold00002	1716349	1717013	-8782449	+	R=256_R=291_R=305_R=277	LTR/Copia	3539	4191	-2035	887
1884	23.7	2.1	2.5	scaffold00002	1721996	1722519	-8776943	+	R=191	LTR/Copia	2715	3236	-1364	888
5547	23.1	5.7	1	scaffold00002	1722710	1724018	-8775444	+	R=191	LTR/Copia	3231	4599	-1	888
4042	7	9.1	0	scaffold00002	1724262	1724820	-8774642	+	Contig28	LTR/Copia	1	610	-3610	889
1037	15.1	2	1.5	scaffold00002	1725597	1725791	-8773671	+	Contig2	LTR/LTR_unclass	1	196	0	890
1047	6.4	0	0	scaffold00002	1726602	1726726	-8772736	+	R=101_R=84	DNA/DNA_unclass	447	571	-2	891
474	27.3	0	0	scaffold00002	1726729	1726838	-8772624	+	R=101_R=84	DNA/DNA_unclass	464	573	0	892
1273	33.8	2.4	1	scaffold00002	1727714	1728332	-8771130	C	Contig26_fr_R=289_R=204	LTR/Copia	-1606	2604	1977	893
1163	4.7	6.7	0	scaffold00002	1728364	1728512	-8770950	+	R=25	DNA/TcMar	6	164	0	894
402	0	0	0	scaffold00002	1728533	1728584	-8770878	C	R=97_R=61	LTR/LTR_unclass	0	371	320	895
278	19.7	6.2	8.5	scaffold00002	1729236	1729379	-8770083	+	Contig28	LTR/Copia	934	1074	-3146	896
1716	29.7	8.8	2.2	scaffold00002	1729474	1730169	-8769293	+	Contig28	LTR/Copia	1351	2091	-2129	897
729	5.3	0	2.1	scaffold00002	1730185	1730280	-8769182	+	R=101_R=84	DNA/DNA_unclass	1	94	-479	898
1329	31.3	3.8	3.8	scaffold00002	1730316	1731023	-8768439	+	Contig28	LTR/Copia	2153	2860	-1360	897
517	36.2	3.1	2.1	scaffold00002	1731383	1732044	-8767418	+	R=134	LTR/Copia	3608	4080	-3	899
553	4.3	0	0	scaffold00002	1732811	1732879	-8766583	+	R=17_R=154	LTR/LTR_unclass	2	70	-670	900
3955	0.5	0	0	scaffold00002	1733121	1733544	-8765918	C	R=46	DNA/TcMar	0	424	1	901
2793	2.8	3.2	4	scaffold00002	1734277	1734650	-8764812	C	R=97_R=61	LTR/LTR_unclass	0	371	1	902
4221	0.4	0.4	0.8	scaffold00002	1735176	1735652	-8763810	+	R=132_R=153	LTR/LTR_unclass	1	475	0	903
243	31.4	0.9	0.9	scaffold00002	1735653	1735752	-8763710	+	R=191	LTR/Copia	1878	1977	-2623	904
518	0	0	0	scaffold00002	1736395	1736451	-8763011	+	Contig19	DNA/TcMar	276	332	0	905
446	9.5	0	1.6	scaffold00002	1736457	1736520	-8762942	C	R=132_R=153	LTR/LTR_unclass	-404	71	9	906
762	10.7	0.8	3.2	scaffold00002	1736521	1736646	-8762816	C	R=55	TE/TE_unclass	-1	123	1	907
1221	19.8	0.8	0.8	scaffold00002	1736729	1736972	-8762490	C	R=79	DNA/Mutatorlike	-404	472	229	908
246	9.3	24.1	0	scaffold00002	1736959	1737012	-8762450	C	R=17_R=154	LTR/LTR_unclass	-174	566	500	909		*
4881	0.3	0	5.1	scaffold00002	1737914	1738515	-8760947	+	R=101_R=84	DNA/DNA_unclass	1	573	0	910
3955	0.5	0	0	scaffold00002	1738859	1739282	-8760180	+	R=46	DNA/TcMar	1	424	0	911
542	20.7	7.2	3.2	scaffold00002	1740621	1740800	-8758662	C	R=181_R=62	LTR/LTR_unclass	-86	187	1	912
236	27.9	1.7	11.2	scaffold00002	1741213	1741329	-8758133	C	R=296	LTR/Copia	-483	150	44	913
328	26.8	3.2	5.8	scaffold00002	1741583	1741705	-8757757	+	R=181_R=62	LTR/LTR_unclass	135	254	-19	914
1709	1.1	0	0	scaffold00002	1742368	1742557	-8756905	+	Contig8	LTR/LTR_unclass	2	191	-402	915
403	0	0	0	scaffold00002	1742994	1743042	-8756420	+	Contig8	LTR/LTR_unclass	461	509	-84	915
2406	4.7	0.3	0.3	scaffold00002	1743043	1743344	-8756118	C	Contig8	LTR/LTR_unclass	0	593	292	916
473	0	3.3	0	scaffold00002	1743370	1743430	-8756032	C	R=97_R=61	LTR/LTR_unclass	0	371	309	917
296	5.3	0	0	scaffold00002	1743431	1743468	-8755994	+	R=97_R=61	LTR/LTR_unclass	249	286	-85	918
320	4.8	0	0	scaffold00002	1743470	1743511	-8755951	+	Contig8	LTR/LTR_unclass	552	593	0	915
1559	10.6	0	0	scaffold00002	1748200	1748407	-8751055	+	R=101_R=84	DNA/DNA_unclass	363	570	-3	919
3968	1.8	3.1	0	scaffold00002	1748778	1749229	-8750233	C	Contig22_R=324_R=244	DNA/TcMar-Tc4	0	2314	1849	920
1332	6.8	0	0	scaffold00002	1749230	1749392	-8750070	C	R=146	TE/TE_unclass	-51	167	5	921
2624	13.3	1.5	0.2	scaffold00002	1749698	1750095	-8749367	+	Contig26_fr_R=289_R=204	LTR/Copia	2208	2610	-1600	922
2388	5.7	1	0.7	scaffold00002	1750076	1750375	-8749087	C	R=17_R=154	LTR/LTR_unclass	-251	489	189	923		*
239	9.1	0	0	scaffold00002	1750510	1750542	-8748920	C	R=17_R=154	LTR/LTR_unclass	-541	199	167	923
4829	1.3	0.2	0	scaffold00002	1752059	1752589	-8746873	+	R=17_R=154	LTR/LTR_unclass	1	532	-208	924
4632	1.4	0	0	scaffold00002	1752590	1753098	-8746364	+	R=81_R=128_R=158	LTR/LTR_unclass	1	509	0	925
1848	1	3.4	0	scaffold00002	1753099	1753304	-8746158	+	R=17_R=154	LTR/LTR_unclass	528	740	0	924
239	19.5	2.4	2.4	scaffold00002	1753329	1753412	-8746050	C	Contig28	LTR/Copia	-3321	899	816	926
3885	0.9	0	0.5	scaffold00002	1755154	1755579	-8743883	+	R=46	DNA/TcMar	1	424	0	927
1887	0.5	0	0	scaffold00002	1756583	1756785	-8742677	+	R=281	LTR/LTR_unclass	1	203	0	928
398	36.5	2.8	3	scaffold00002	1758930	1759460	-8740002	+	R=21	LTR/Gypsy	2140	2669	-5990	929
1909	0	0	0	scaffold00002	1761305	1761507	-8737955	+	R=281	LTR/LTR_unclass	1	203	0	930
447	3.9	0	0	scaffold00002	1761560	1761611	-8737851	C	R=101_R=84	DNA/DNA_unclass	-81	492	441	931		*
1166	8.5	8.7	3	scaffold00002	1761606	1761824	-8737638	C	Contig33_R=163	TE/TE_unclass	-21	231	1	932
495	1.6	0	1.6	scaffold00002	1761825	1761886	-8737576	C	R=101_R=84	DNA/DNA_unclass	-512	61	1	931
744	14.1	1.6	0	scaffold00002	1762839	1762959	-8736503	C	R=79	DNA/Mutatorlike	-505	371	249	933
616	0	1.4	0	scaffold00002	1763085	1763154	-8736308	+	R=40	TE/TE_unclass	1	71	0	934
1837	15.8	0	0	scaffold00002	1763192	1763476	-8735986	C	R=79	DNA/Mutatorlike	0	876	592	935
2948	13.3	2.8	0.8	scaffold00002	1763557	1764018	-8735444	C	R=79	DNA/Mutatorlike	-397	479	9	935
344	35.4	4	2	scaffold00002	1764176	1764475	-8734987	+	R=212	LTR/Copia	1251	1556	-2897	936
1312	18.9	2.3	5.8	scaffold00002	1764476	1764779	-8734683	+	R=101_R=84	DNA/DNA_unclass	1	294	-279	937
947	33.2	6	1.8	scaffold00002	1764868	1765415	-8734047	C	Contig26_fr_R=289_R=204	LTR/Copia	-2737	1473	903	938
242	30.1	0	4	scaffold00002	1768076	1768179	-8731283	+	Contig22_R=324_R=244	DNA/TcMar-Tc4	623	722	-1592	939
9578	0	0	0	scaffold00002	1769067	1770080	-8729382	+	R=54_R=322	DNA/TcMar	1	1014	0	940
225	28.8	0	0	scaffold00002	1770391	1770456	-8729006	+	R=256_R=291_R=305_R=277	LTR/Copia	1986	2051	-4175	941
357	32.1	7	3.3	scaffold00002	1771045	1771119	-8728343	+	Contig26_fr_R=289_R=204	LTR/Copia	2106	2179	-2031	942
250	36.4	2.1	2.1	scaffold00002	1771120	1771310	-8728152	C	R=212	LTR/Copia	-2909	1544	1354	943
357	32.1	7	3.3	scaffold00002	1771311	1771558	-8727904	+	Contig26_fr_R=289_R=204	LTR/Copia	2180	2427	-1783	942
1314	6.5	1.6	2.1	scaffold00002	1771976	1772163	-8727299	C	Contig28	LTR/Copia	-4033	187	1	944
9578	0	0	0	scaffold00002	1774278	1775291	-8724171	C	R=54_R=322	DNA/TcMar	0	1014	1	945
4391	1.4	0	0	scaffold00002	1775832	1776324	-8723138	C	Contig8	LTR/LTR_unclass	0	593	101	946
8191	0.6	0	0	scaffold00002	1776325	1777199	-8722263	C	R=79	DNA/Mutatorlike	-1	875	1	947
956	1.9	0	0	scaffold00002	1777200	1777307	-8722155	C	Contig8	LTR/LTR_unclass	-485	108	1	946
1342	1.3	0	0	scaffold00002	1777325	1777473	-8721989	C	R=96	LTR/LTR_unclass	0	149	1	948
6683	0.8	0.4	1.4	scaffold00002	1777516	1778262	-8721200	C	R=17_R=154	LTR/LTR_unclass	0	740	1	949
535	31.1	6.1	4.2	scaffold00002	1778263	1778704	-8720758	+	R=191	LTR/Copia	1711	2160	-2440	950
729	7.9	0	0	scaffold00002	1779921	1780009	-8719453	+	R=13	LTR/LTR_unclass	1	89	0	951
720	8	0	0	scaffold00002	1780187	1780274	-8719188	+	R=13	LTR/LTR_unclass	1	88	-1	952
457	31.4	5.1	3.8	scaffold00002	1780894	1781128	-8718334	+	Contig26_fr_R=289_R=204	LTR/Copia	745	982	-3228	953
4816	1.1	0.4	0	scaffold00002	1781148	1781675	-8717787	+	R=17_R=154	LTR/LTR_unclass	2	531	-209	954
3608	1	0.5	0.5	scaffold00002	1781693	1782101	-8717361	+	R=132_R=153	LTR/LTR_unclass	1	409	-66	955
1638	2.2	0	0	scaffold00002	1782119	1782299	-8717163	+	R=17_R=154	LTR/LTR_unclass	560	740	0	954
3445	32	4.5	3.2	scaffold00002	1782311	1784245	-8715217	+	Contig26_fr_R=289_R=204	LTR/Copia	1005	2965	-1245	953
278	14.6	0	0	scaffold00002	1787470	1787517	-8711945	+	Contig22_R=324_R=244	DNA/TcMar-Tc4	2267	2314	0	956
245	11.4	0	0	scaffold00002	1813113	1813147	-8686315	C	R=74	TE/TE_unclass	0	95	61	957
715	7.5	0	0	scaffold00002	1813296	1813389	-8686073	+	R=74	TE/TE_unclass	2	95	0	958
306	14.9	14.4	3	scaffold00002	1867208	1867297	-8632165	+	R=146	TE/TE_unclass	35	134	-84	959
433	24.6	2.5	0.8	scaffold00002	1871485	1871603	-8627859	C	Contig15_fr	DNA/TcMar-Tc1	-28	473	353	960
402	11.3	3.9	0	scaffold00002	1871623	1871729	-8627733	+	R=102	TE/TE_unclass	1	146	-134	961
273	27.6	5.3	1	scaffold00002	1871780	1871874	-8627588	C	Contig17	RC/Helitron	0	482	384	962
325	27.5	9	3.2	scaffold00002	1871897	1872129	-8627333	C	Contig17	RC/Helitron	-165	317	2	962
1075	17.3	8.4	8.8	scaffold00002	1904801	1905085	-8594377	+	R=109_contig5	DNA/hAT	8	291	-65	963
2617	8.1	1.1	0	scaffold00002	1913659	1914018	-8585444	+	R=29	DNA/DNA_unclass	1	364	0	964
345	10.2	0	0	scaffold00002	1914099	1914147	-8585315	+	Contig12	DNA/TcMar	1	49	-371	965
658	4.9	0	0	scaffold00002	1919408	1919489	-8579973	+	Contig16	LTR/LTR_unclass	1	82	-117	966
1183	17.4	3.2	5.5	scaffold00002	1921585	1921863	-8577599	+	R=181_R=62	LTR/LTR_unclass	1	273	0	967
1496	6.7	0	0	scaffold00002	1923183	1923375	-8576087	C	Contig28	LTR/Copia	-3842	378	186	968
2384	0.4	0	0	scaffold00002	1925405	1925677	-8573785	+	R=181_R=62	LTR/LTR_unclass	1	273	0	969
1173	8.2	9.2	0.5	scaffold00002	1927716	1927900	-8571562	C	Contig28	LTR/Copia	-4019	201	1	968
475	36.7	2.7	1.8	scaffold00002	1928268	1928605	-8570857	+	R=212	LTR/Copia	1256	1596	-2857	970
1381	6.3	2.6	0	scaffold00002	1928649	1928838	-8570624	+	R=17_R=154	LTR/LTR_unclass	1	195	-545	971
1060	6.5	0	0	scaffold00002	1928923	1929061	-8570401	+	R=20	TE/TE_unclass	1	139	0	972
319	24.4	4.2	5	scaffold00002	1928969	1929110	-8570352	C	Contig19	DNA/TcMar	-43	289	149	973		*
2407	0	0	0	scaffold00002	1930780	1931052	-8568410	C	R=181_R=62	LTR/LTR_unclass	0	273	1	974
709	17.1	1.1	9.3	scaffold00002	1931681	1931854	-8567608	C	R=207	DNA/DNA_unclass	-159	161	1	975
472	8.8	0	2.9	scaffold00002	1931867	1931936	-8567526	+	R=17_R=154	LTR/LTR_unclass	186	253	-487	976
1547	5.1	0	0	scaffold00002	1931939	1932134	-8567328	+	R=101_R=84	DNA/DNA_unclass	378	573	0	977
583	37.4	2.9	2.9	scaffold00002	1933125	1933672	-8565790	+	Contig26_fr_R=289_R=204	LTR/Copia	1012	1559	-2651	978
316	35.9	4.3	4	scaffold00002	1933874	1934172	-8565290	C	R=212	LTR/Copia	-2717	1736	1437	979		*
363	34.1	3.1	1.8	scaffold00002	1933931	1934337	-8565125	+	Contig26_fr_R=289_R=204	LTR/Copia	1971	2245	-1965	980
686	1.2	0	1.2	scaffold00002	1936210	1936296	-8563166	C	R=165	TE/TE_unclass	-165	86	1	981
1515	6.1	0.5	0	scaffold00002	1936313	1936510	-8562952	+	Contig16	LTR/LTR_unclass	1	199	0	982
473	1.2	0.6	0.6	scaffold00002	1945422	1945582	-8553880	C	Contig1	simple_repeat	0	357	219	983
450	1.5	1.4	3.6	scaffold00002	1945503	1945642	-8553820	+	Contig1	simple_repeat	1	137	-220	984		*
283	7.2	0	2.9	scaffold00002	1945559	1945700	-8553762	C	Contig1	simple_repeat	0	357	220	985		*
21605	0	0	0.2	scaffold00002	1995659	1998164	-8501298	C	Contig30	LTR/Copia	0	2501	1	986
327	16.2	3	3.7	scaffold00002	2010427	2010561	-8488901	+	Contig1	simple_repeat	158	291	-66	987
531	15.8	0.5	17.5	scaffold00002	2025198	2025397	-8474065	C	Contig1	simple_repeat	-73	284	114	988
313	0	6.7	0	scaffold00002	2025369	2025413	-8474049	+	Contig1	simple_repeat	117	164	-193	989		*
963	5.5	3.9	1.1	scaffold00002	2047657	2047838	-8451624	+	Contig1	simple_repeat	124	310	-47	990
846	16.9	2.5	0	scaffold00002	2096874	2097033	-8402429	+	R=25	DNA/TcMar	1	164	0	991
958	0	0	0	scaffold00002	2105565	2105666	-8393796	+	R=193	TE/TE_unclass	1	102	0	992
308	16.4	0	0	scaffold00002	2122003	2122057	-8377405	+	R=109_contig5	DNA/hAT	1	55	-301	993		*
326	12.9	4.8	1.5	scaffold00002	2122027	2122089	-8377373	+	R=109_contig5	DNA/hAT	292	356	0	994
1344	16.1	16.9	1.1	scaffold00002	2131225	2131532	-8367930	C	R=109_contig5	DNA/hAT	0	356	1	995
2230	0.8	0	0	scaffold00002	2133815	2134054	-8365408	C	R=11	DNA/hAT	-1	4717	4478	996
1578	0.6	0	0	scaffold00002	2134052	2134224	-8365238	C	R=11	DNA/hAT	-4545	173	1	997		*
1297	2.7	2.7	1.3	scaffold00002	2136875	2137097	-8362365	+	Contig1	simple_repeat	131	356	-1	998
319	7.1	0.9	0.9	scaffold00002	2137004	2137117	-8362345	C	Contig1	simple_repeat	-243	114	1	999		*
573	0.2	0	0.7	scaffold00002	2146816	2147017	-8352445	+	Contig1	simple_repeat	215	357	0	1000
244	0	0	0	scaffold00002	2146963	2147026	-8352436	C	Contig1	simple_repeat	-243	114	51	1001		*
255	24.7	0	0	scaffold00002	2152382	2152478	-8346984	C	R=11	DNA/hAT	-4034	684	588	1002
4098	23.8	0.6	0.6	scaffold00002	2184155	2185051	-8314411	+	R=2	TE/TE_unclass	15	911	-22	1003
1364	1.5	3	0.5	scaffold00002	2205241	2205442	-8294020	C	Contig1	simple_repeat	-30	327	121	1004
2915	20.4	2.1	1	scaffold00002	2222609	2223228	-8276234	C	R=2	TE/TE_unclass	0	933	307	1005
1533	0	0	0	scaffold00002	2223473	2223636	-8275826	C	R=25	DNA/TcMar	0	164	1	1006
409	25.2	0	0	scaffold00002	2233834	2233932	-8265530	+	R=44	TE/TE_unclass	35	133	-114	1007
579	13.3	0	0	scaffold00002	2240650	2240739	-8258723	+	R=53	TE/TE_unclass	1	90	0	1008
456	25.2	0	3	scaffold00002	2322487	2322625	-8176837	C	R=44	TE/TE_unclass	-78	169	35	1009
842	5.3	4.5	3.2	scaffold00002	2340629	2340783	-8158679	C	Contig1	simple_repeat	-138	219	63	1010
1642	3.4	1.2	0	scaffold00002	2349248	2349488	-8149974	C	Contig1	simple_repeat	-3	354	121	1011
667	23.4	0	0	scaffold00002	2369938	2370078	-8129384	C	R=8	DNA/TcMar	-26	194	54	1012
80095	0.1	0	0	scaffold00002	2370081	2378739	-8120723	C	R=21	LTR/Gypsy	0	8659	1	1013
248	11.1	0	0	scaffold00002	2378740	2378775	-8120687	C	R=8	DNA/TcMar	-184	36	1	1012
560	6.5	2.3	6.2	scaffold00002	2399894	2400155	-8099307	+	Contig1	simple_repeat	68	224	-133	1014
271	5.5	0	0	scaffold00002	2400156	2400210	-8099252	+	Contig1	simple_repeat	69	123	-234	1015		*
1239	10.1	0	0.6	scaffold00002	2400210	2400378	-8099084	C	R=93	LTR/LTR_unclass	-12	168	1	1016
546	25.9	3.8	0.6	scaffold00002	2400379	2400469	-8098993	C	R=191	LTR/Copia	-188	4412	4317	1017
399	1.9	3.9	0	scaffold00002	2400517	2400568	-8098894	+	R=146	TE/TE_unclass	99	152	-66	1018
322	24.7	0	2.6	scaffold00002	2403071	2403149	-8096313	+	R=30	DNA/TcMar	2	78	-19	1019
3862	24.4	1.2	1.2	scaffold00002	2409084	2409968	-8089494	C	R=2	TE/TE_unclass	-24	909	25	1020
1142	15.7	4.7	0.5	scaffold00002	2444153	2444363	-8055099	C	R=8	DNA/TcMar	0	220	1	1021
611	3.9	1.3	1.3	scaffold00002	2490150	2490227	-8009235	C	Contig1	simple_repeat	-163	194	117	1022
347	10	2.2	1.1	scaffold00002	2490185	2490275	-8009187	+	Contig1	simple_repeat	113	204	-153	1022		*
533	13.8	3	2.2	scaffold00002	2520875	2521007	-7978455	C	Contig1	simple_repeat	-177	180	47	1023
894	30	5.1	0.6	scaffold00002	2525762	2526093	-7973369	+	R=200	DNA/DNA_unclass	4	350	0	1024
227	25.8	3.1	3.1	scaffold00002	2533084	2533147	-7966315	+	R=183	TE/TE_unclass	1	64	-19	1025
2790	2.1	2.1	0	scaffold00002	2534290	2534614	-7964848	C	Contig19	DNA/TcMar	0	332	1	1026
228	10.3	0	0	scaffold00002	2557105	2557133	-7942329	C	Contig31	DNA/hAT	0	428	400	1027		*
458	14.6	16.9	3.8	scaffold00002	2557115	2557256	-7942206	+	Contig31	DNA/hAT	269	428	0	1028
1641	3.6	1	0	scaffold00002	2562843	2563034	-7936428	C	R=58	RC/Helitron	0	194	1	1029
785	30.8	4	3.5	scaffold00002	2614686	2615115	-7884347	C	R=69	TE/TE_unclass	-241	473	42	1030
989	4.1	0	0	scaffold00002	2635231	2635352	-7864110	C	Contig15_fr	DNA/TcMar-Tc1	0	501	380	1031
580	0	0	0	scaffold00002	2635353	2635416	-7864046	+	R=14	DNA/TcMar	190	253	0	1032
598	23.5	0.7	0	scaffold00002	2642715	2642751	-7856711	C	R=38	DNA/DNA_unclass	-1	137	4	1033
702	8.3	1	0	scaffold00002	2642752	2642847	-7856615	C	R=30	DNA/TcMar	0	97	1	1034
4029	0	0	0	scaffold00002	2653856	2654283	-7845179	+	Contig31	DNA/hAT	1	428	0	1035
502	8	1.2	8.5	scaffold00002	2697594	2697757	-7801705	C	Contig1	simple_repeat	-161	196	44	1036
1583	13.6	7.7	2.4	scaffold00002	2710752	2711074	-7788388	+	R=109_contig5	DNA/hAT	1	340	-16	1037
318	12.3	5.3	0	scaffold00002	2711217	2711273	-7788189	C	R=109_contig5	DNA/hAT	-286	70	11	1038
596	7.2	3.6	0	scaffold00002	2711281	2711363	-7788099	C	R=109_contig5	DNA/hAT	-269	87	2	1039
1495	0.3	3.8	14.8	scaffold00002	2726421	2726722	-7772740	C	Contig1	simple_repeat	-137	220	1	1040		*
1511	0	0.4	3.1	scaffold00002	2726496	2726726	-7772736	+	Contig1	simple_repeat	114	338	-19	1041
1912	10.7	0	0	scaffold00002	2732599	2732869	-7766593	C	Contig10_fl_Contig13	DNA/TcMar-Mariner	0	1288	1018	1042
1066	3.2	0	0	scaffold00002	2732925	2733047	-7766415	+	R=95	LTR/LTR_unclass	1	123	-290	1043
357	11.3	9.9	4.3	scaffold00002	2733047	2733157	-7766305	+	Contig33_R=163	TE/TE_unclass	1	117	-135	1044		*
814	5.3	8.8	0	scaffold00002	2735186	2735299	-7764163	C	Contig17	RC/Helitron	0	482	359	1045
1096	5	25.3	0.4	scaffold00002	2735457	2735638	-7763824	C	R=97_R=61	LTR/LTR_unclass	-81	290	64	1046
1725	12.8	2.4	2.4	scaffold00002	2736160	2736455	-7763007	+	R=104	LTR/LTR_unclass	1	296	0	1047
1254	5.7	2.6	0	scaffold00002	2751235	2751427	-7748035	C	Contig1	simple_repeat	-145	212	15	1048
1003	2.5	2.5	3.7	scaffold00002	2754984	2755146	-7744316	C	Contig1	simple_repeat	-69	288	128	1049
229	5.4	0	0	scaffold00002	2767249	2767322	-7732140	C	Contig1	simple_repeat	-283	74	1	1050
481	2.2	0	0.7	scaffold00002	2772671	2772807	-7726655	+	Contig1	simple_repeat	222	357	0	1051
513	16.9	3.1	7.2	scaffold00002	2795430	2795588	-7703874	C	Contig1	simple_repeat	-137	220	68	1052
877	3.3	13.1	0	scaffold00002	2798978	2799099	-7700363	+	R=38	DNA/DNA_unclass	1	138	0	1053
1093	3.4	0.6	2.8	scaffold00002	2813434	2813613	-7685849	+	Contig1	simple_repeat	139	314	-43	1054
304	12.3	0	3.1	scaffold00002	2815855	2815921	-7683541	C	R=132_R=153	LTR/LTR_unclass	-45	430	366	1055
235	19.2	5.8	0	scaffold00002	2819692	2819743	-7679719	C	R=132_R=153	LTR/LTR_unclass	-71	404	350	1055
537	20.4	0	0	scaffold00002	2820749	2820856	-7678606	C	R=2	TE/TE_unclass	-38	895	788	1056
3088	28.9	0.5	0.5	scaffold00002	2821006	2821938	-7677524	C	R=2	TE/TE_unclass	0	933	1	1057
3232	27.9	1	1	scaffold00002	2855233	2856165	-7643297	+	R=2	TE/TE_unclass	1	933	0	1058
3233	28.3	0.8	0.8	scaffold00002	2880692	2881616	-7617846	C	R=2	TE/TE_unclass	-8	925	1	1059
248	25.1	5.1	0.5	scaffold00002	2909821	2909996	-7589466	+	R=11	DNA/hAT	490	673	-4045	1060
483	4.8	1.6	0	scaffold00002	2912034	2912096	-7587366	C	R=38	DNA/DNA_unclass	0	138	75	1061
4599	0.6	0	0	scaffold00002	2928997	2929518	-7569944	C	R=10	DNA/hAT	0	522	1	1062
525	21.8	6.7	0.7	scaffold00002	2929843	2929976	-7569486	+	Contig2	LTR/LTR_unclass	1	142	-54	1063
605	3.2	4.2	2.5	scaffold00002	2944026	2944218	-7555244	C	Contig1	simple_repeat	-1	356	161	1064
320	31.6	0	0	scaffold00002	2968305	2968418	-7531044	C	R=55	TE/TE_unclass	-8	116	3	1065
323	0	0	0	scaffold00002	2976280	2976368	-7523094	C	Contig1	simple_repeat	-267	90	2	1066
1589	0.6	0	0	scaffold00002	2990177	2990356	-7509106	+	R=93	LTR/LTR_unclass	1	180	0	1067
861	21	0	5.4	scaffold00002	3018272	3018467	-7480995	C	R=207	DNA/DNA_unclass	0	320	135	1068
1440	13.3	0.4	0.4	scaffold00002	3020212	3020438	-7479024	C	R=7	DNA/DNA_unclass	-150	227	1	1069
316	11.3	0	0	scaffold00002	3028125	3028239	-7471223	C	Contig1	simple_repeat	-238	119	5	1070
846	0	0	0	scaffold00002	3039970	3040066	-7459396	C	R=54_R=322	DNA/TcMar	0	1014	918	1071
558	5.6	0	2.8	scaffold00002	3040949	3041021	-7458441	+	R=74	TE/TE_unclass	17	87	-8	1072
789	13	15.6	0	scaffold00002	3106171	3106324	-7393138	+	Contig2	LTR/LTR_unclass	7	184	-12	1073
313	27.8	1	1	scaffold00002	3107649	3107746	-7391716	C	R=69	TE/TE_unclass	-305	409	312	1074
1099	14.8	2.1	1	scaffold00002	3113619	3113809	-7385653	+	Contig2	LTR/LTR_unclass	1	193	-3	1075
1505	0.5	0	17.4	scaffold00002	3164124	3164379	-7335083	C	Contig1	simple_repeat	-139	218	1	1076		*
1627	5	3.3	0.4	scaffold00002	3164179	3164421	-7335041	+	Contig1	simple_repeat	107	356	-1	1077
435	0	2.7	8.3	scaffold00002	3212144	3212331	-7287131	+	Contig1	simple_repeat	199	357	0	1078
406	30.3	6.5	0.6	scaffold00002	3213015	3213167	-7286295	+	R=2	TE/TE_unclass	766	927	-6	1079
3280	3.2	0	0	scaffold00002	3221296	3221672	-7277790	+	R=7	DNA/DNA_unclass	1	377	0	1080
3157	26.1	2.6	2.4	scaffold00002	3229529	3230427	-7269035	+	R=2	TE/TE_unclass	13	912	-21	1081
3193	26.6	2.2	2.1	scaffold00002	3248679	3249587	-7249875	+	R=2	TE/TE_unclass	13	922	-11	1082
344	1.6	0.8	0.5	scaffold00002	3271469	3271585	-7227877	C	Contig1	simple_repeat	-233	124	1	1083
2655	25.9	1.7	1.4	scaffold00002	3305649	3306360	-7193102	C	R=2	TE/TE_unclass	-180	753	40	1084
1083	6.5	1.7	14.6	scaffold00002	3337909	3338140	-7161322	C	Contig1	simple_repeat	-136	221	16	1085
246	9.8	0	0	scaffold00002	3345754	3345804	-7153658	C	Contig1	simple_repeat	-237	120	70	1086
2859	27.2	2.9	2.9	scaffold00002	3399900	3400784	-7098678	+	R=2	TE/TE_unclass	7	891	-42	1087
855	19.2	1.2	0	scaffold00002	3417094	3417254	-7082208	C	R=25	DNA/TcMar	-1	163	1	1088
358	18.6	0.4	7.3	scaffold00002	3455775	3455938	-7043524	+	R=11	DNA/hAT	525	712	-4006	1089
248	23	5.4	5.4	scaffold00002	3459337	3459428	-7040034	C	R=44	TE/TE_unclass	-2	245	154	1090
861	12	0.8	0	scaffold00002	3506540	3506664	-6992798	+	Contig12	DNA/TcMar	295	420	0	1091
588	22.8	0.7	0.7	scaffold00002	3507165	3507203	-6992259	C	R=38	DNA/DNA_unclass	-1	137	4	1092
792	4.2	0	0	scaffold00002	3507204	3507298	-6992164	C	R=30	DNA/TcMar	-2	95	1	1093
538	4	12	0	scaffold00002	3515716	3515790	-6983672	C	R=30	DNA/TcMar	-8	89	6	1094
314	34.1	9.8	2	scaffold00002	3544743	3545068	-6954394	+	R=7	DNA/DNA_unclass	4	354	-23	1095
2926	28.9	1.3	1.4	scaffold00002	3609722	3610638	-6888824	+	R=2	TE/TE_unclass	18	933	0	1096
522	0	0	0.6	scaffold00002	3616519	3616786	-6882676	+	Contig1	simple_repeat	220	357	0	1097
290	15.6	1.6	0	scaffold00002	3635759	3635822	-6863640	C	Contig17	RC/Helitron	-257	225	161	1098
522	0	0	0.5	scaffold00002	3652247	3652456	-6847006	C	Contig1	simple_repeat	0	357	221	1099
233	25.8	3.3	3.3	scaffold00002	3680611	3680702	-6818760	C	Contig17	RC/Helitron	-5	477	386	1100
858	0	0	0	scaffold00002	3683075	3683165	-6816297	+	R=236_fl_R=279_R-234_R=130	DNA/TcMar	1	91	-1395	1101
7455	0.4	0	0	scaffold00002	3685311	3686106	-6813356	+	R=236_fl_R=279_R-234_R=130	DNA/TcMar	691	1486	0	1102
1278	12.4	0	0	scaffold00002	3690512	3690697	-6808765	+	R=152	LTR/LTR_unclass	1	186	0	1103
689	9.6	3.5	2.3	scaffold00002	3713401	3713571	-6785891	+	Contig1	simple_repeat	138	310	-47	1104
801	5.7	4.4	1.2	scaffold00002	3744976	3745135	-6754327	C	Contig1	simple_repeat	-47	310	146	1105
280	27	2.2	2.2	scaffold00002	3749243	3749333	-6750129	+	R=2	TE/TE_unclass	1	91	-842	1106
3830	23.8	1.4	1.5	scaffold00002	3749546	3750478	-6748984	+	R=2	TE/TE_unclass	1	932	-1	1107
3578	25.1	1.4	1.5	scaffold00002	3761959	3762891	-6736571	+	R=2	TE/TE_unclass	1	932	-1	1108
3730	24.4	1.3	1.4	scaffold00002	3763702	3764627	-6734835	+	R=2	TE/TE_unclass	1	925	-8	1109
290	16.9	12.5	1.2	scaffold00002	3778068	3778139	-6721323	C	R=314_contig27_R=228_R=177_R=37	DNA/hAT	-737	81	2	1110
1311	0	2.3	0	scaffold00002	3794765	3794937	-6704525	+	Contig1	simple_repeat	28	204	-153	1111
3847	23	1.3	1.4	scaffold00002	3796268	3797184	-6702278	+	R=2	TE/TE_unclass	17	932	-1	1112
3694	24.6	1.6	1.9	scaffold00002	3798005	3798939	-6700523	+	R=2	TE/TE_unclass	1	932	-1	1113
487	10.2	5	1.6	scaffold00002	3839233	3839352	-6660110	C	Contig1	simple_repeat	-89	268	145	1114
232	1.7	1.7	1.7	scaffold00002	3840002	3840061	-6659401	+	Contig1	simple_repeat	62	121	-236	1115
795	20.4	7.8	1.4	scaffold00002	3850986	3851189	-6648273	C	R=8	DNA/TcMar	0	220	4	1116
1130	16.2	5.5	0.9	scaffold00002	3864876	3865093	-6634369	C	Contig30	LTR/Copia	-2273	228	1	1117
1413	7	0	0	scaffold00002	3865099	3865297	-6634165	+	Contig21	DNA/TcMar-Tc1	805	1003	-395	1118
2616	6.6	8.3	0	scaffold00002	3865512	3865873	-6633589	+	Contig21	DNA/TcMar-Tc1	1007	1398	0	1119
1237	14.6	0	1	scaffold00002	3865921	3866128	-6633334	+	R=79	DNA/Mutatorlike	9	214	-662	1120
362	11.3	0	0	scaffold00002	3866142	3866194	-6633268	C	R=79	DNA/Mutatorlike	-815	61	9	1121
1780	11.8	2.9	0	scaffold00002	3867874	3868145	-6631317	+	R=79	DNA/Mutatorlike	1	280	-596	1122
984	7	0	0	scaffold00002	3868137	3868265	-6631197	C	R=21	LTR/Gypsy	-8528	131	3	1123		*
305	15.8	8.4	2.6	scaffold00002	3900713	3900855	-6598607	+	Contig1	simple_repeat	45	195	-162	1124
474	11.2	5.2	7.3	scaffold00002	4030300	4030453	-6469009	C	Contig1	simple_repeat	-162	195	45	1125
1078	15.4	0	0	scaffold00002	4052766	4052940	-6446522	+	Contig12	DNA/TcMar	1	175	-245	1126
875	28.1	0	0	scaffold00002	4102064	4102294	-6397168	+	R=2	TE/TE_unclass	703	933	0	1127
4033	24.7	0.2	0.2	scaffold00002	4111697	4112612	-6386850	C	R=2	TE/TE_unclass	0	933	18	1128
400	22.4	1.2	0	scaffold00002	4117616	4117700	-6381762	C	R=53	TE/TE_unclass	-2	88	3	1129
337	9.7	3.2	0	scaffold00002	4117871	4117963	-6381499	+	Contig1	simple_repeat	45	140	-217	1130
342	2.3	0	2.3	scaffold00002	4118001	4118132	-6381330	C	Contig1	simple_repeat	-10	347	219	1131
952	3.7	0	0	scaffold00002	4144650	4144758	-6354704	+	R=109_contig5	DNA/hAT	1	109	-247	1132
1792	15.4	2.8	10.7	scaffold00002	4145011	4145402	-6354060	C	R=29	DNA/DNA_unclass	0	364	1	1133
41145	0	0	0	scaffold00002	4149206	4153566	-6345896	C	R=11	DNA/hAT	-349	4369	9	1134
300	16.7	0	0	scaffold00002	4162844	4162897	-6336565	C	R=44	TE/TE_unclass	0	247	194	1135
429	2.8	0	3.5	scaffold00002	4235723	4235868	-6263594	C	Contig1	simple_repeat	0	357	217	1136
726	6.7	0	0	scaffold00002	4333651	4333740	-6165722	C	R=53	TE/TE_unclass	0	90	1	1137
533	13.8	0	0	scaffold00002	4333838	4333917	-6165545	+	R=30	DNA/TcMar	2	81	-16	1138
335	21.9	2.2	4.6	scaffold00002	4368036	4368270	-6131192	C	R=11	DNA/hAT	-4022	696	488	1139
675	0.7	1.4	2.1	scaffold00002	4384183	4384327	-6115135	C	Contig1	simple_repeat	-13	344	201	1140
513	0.2	0	1.4	scaffold00002	4389786	4390045	-6109417	C	Contig1	simple_repeat	0	357	219	1141
316	2.5	0	0	scaffold00002	4395946	4396024	-6103438	C	Contig1	simple_repeat	-277	80	2	1142
15576	0.1	0	0	scaffold00002	4465027	4466687	-6032775	+	R=26	DNA/TcMar-Tc1	1	1661	0	1143
1388	0	1.1	1.1	scaffold00002	4482863	4483037	-6016425	+	Contig1	simple_repeat	37	211	-146	1144
767	0	1.6	17.4	scaffold00002	4500810	4500935	-5998527	C	Contig1	simple_repeat	-136	221	113	1145		*
1015	16.1	1.2	4.7	scaffold00002	4500826	4501066	-5998396	+	Contig1	simple_repeat	114	346	-11	1146
1028	15.5	25.4	0.6	scaffold00002	4507680	4507958	-5991504	C	R=109_contig5	DNA/hAT	-8	348	1	1147
581	4.9	9.6	1.9	scaffold00002	4570374	4570519	-5928943	C	Contig1	simple_repeat	-77	280	124	1148
451	0	4.6	1.5	scaffold00002	4577764	4577828	-5921634	+	Contig1	simple_repeat	117	183	-174	1149
248	19.1	3.3	5	scaffold00002	4577916	4578036	-5921426	+	Contig1	simple_repeat	177	295	-62	1150
1384	0	0	0	scaffold00002	4595472	4595625	-5903837	+	R=265	LTR/LTR_unclass	1	154	0	1151
2342	25.8	7	2.3	scaffold00002	4610799	4611640	-5887822	+	R=2	TE/TE_unclass	30	910	-23	1152
616	0	1.4	0	scaffold00002	4625113	4625184	-5874278	+	Contig1	simple_repeat	114	186	-171	1153
437	5.1	0	5.1	scaffold00002	4631927	4631988	-5867474	+	R=30	DNA/TcMar	15	73	-24	1154
337	22.7	8.8	2.5	scaffold00002	4631989	4632039	-5867423	+	R=38	DNA/DNA_unclass	18	137	-1	1155
1289	18.5	2.8	2.8	scaffold00002	4632538	4632854	-5866608	C	R=29	DNA/DNA_unclass	0	364	48	1156
453	21.8	9.5	1.5	scaffold00002	4639987	4640112	-5859350	+	R=38	DNA/DNA_unclass	1	136	-2	1157
683	6.7	0	0	scaffold00002	4641491	4641579	-5857883	+	R=13	LTR/LTR_unclass	1	89	0	1158
418	2.4	7.1	3.4	scaffold00002	4677804	4677888	-5821574	+	Contig1	simple_repeat	123	210	-147	1159
550	0.2	0	4.1	scaffold00002	4690579	4690844	-5808618	+	Contig1	simple_repeat	215	357	0	1160
398	0.9	0	0	scaffold00002	4690744	4690856	-5808606	C	Contig1	simple_repeat	-243	114	2	1161		*
525	23.9	1.5	0.7	scaffold00002	4707388	4707423	-5792039	C	R=38	DNA/DNA_unclass	-1	137	4	1162
716	8.2	0	0	scaffold00002	4707424	4707520	-5791942	C	R=30	DNA/TcMar	0	97	1	1163
1352	0.5	1.4	0.5	scaffold00002	4716554	4716766	-5782696	+	Contig1	simple_repeat	143	357	0	1164
257	19.1	0	0	scaffold00002	4749703	4749796	-5749666	C	Contig1	simple_repeat	-262	95	2	1165
308	11.3	0	0.8	scaffold00002	4754776	4754900	-5744562	+	Contig1	simple_repeat	220	343	-14	1166
3801	23.6	1	1	scaffold00002	4778583	4779463	-5719999	+	R=2	TE/TE_unclass	11	891	-42	1167
820	23.7	0.5	1.6	scaffold00002	4798735	4798923	-5700539	C	R=77	LTR/LTR_unclass	0	189	3	1168
500	16.7	0	0	scaffold00002	4800008	4800091	-5699371	C	R=44	TE/TE_unclass	-97	150	67	1169
341	5.4	1.1	0	scaffold00002	4857515	4857606	-5641856	+	Contig1	simple_repeat	219	311	-46	1170
248	20	0	0	scaffold00002	4858468	4858562	-5640900	+	R=11	DNA/hAT	579	673	-4045	1171
228	13.8	0	0	scaffold00002	4882369	4882448	-5617014	C	Contig1	simple_repeat	-241	116	37	1172
380	9	8.8	2.4	scaffold00002	4882593	4882751	-5616711	C	Contig1	simple_repeat	-163	194	26	1173
721	6.7	0	0	scaffold00002	4893465	4893554	-5605908	+	R=53	TE/TE_unclass	1	90	0	1174
1715	8	0	0.9	scaffold00002	4902146	4902373	-5597089	C	R=314_contig27_R=228_R=177_R=37	DNA/hAT	0	818	593	1175
226	31.9	3.3	1.1	scaffold00002	4904670	4904761	-5594701	C	R=314_contig27_R=228_R=177_R=37	DNA/hAT	-494	324	231	1175
1834	4.5	0	0.5	scaffold00002	4906418	4906639	-5592823	C	R=314_contig27_R=228_R=177_R=37	DNA/hAT	-597	221	1	1175
583	12.7	1.3	4.5	scaffold00002	4918507	4918737	-5580725	C	Contig1	simple_repeat	-20	337	114	1176
240	3.7	0	0	scaffold00002	4930703	4930729	-5568733	+	Contig10_fl_Contig13	DNA/TcMar-Mariner	1	27	-1261	1177
261	4.8	0	0	scaffold00002	4933981	4934063	-5565399	C	Contig1	simple_repeat	-274	83	1	1178
2863	1.2	1.5	0	scaffold00002	4938547	4938880	-5560582	+	Contig9_R=103	LTR/LTR_unclass	1	339	0	1179
230	20.3	6.2	0	scaffold00002	4956496	4956559	-5542903	C	R=11	DNA/hAT	-4120	598	531	1180
265	16.2	0	0	scaffold00002	4958369	4958473	-5540989	C	Contig1	simple_repeat	-239	118	14	1181
556	9.2	0	0	scaffold00002	4967489	4967564	-5531898	+	R=13	LTR/LTR_unclass	1	76	-13	1182
4560	1	0	0	scaffold00002	5017299	5017799	-5481663	C	Contig15_fr	DNA/TcMar-Tc1	0	501	1	1183
285	32.5	3.3	3.6	scaffold00002	5017800	5017853	-5481609	+	R=26	DNA/TcMar-Tc1	478	530	-1131	1184
265	23.2	0	0	scaffold00002	5018029	5018084	-5481378	+	R=26	DNA/TcMar-Tc1	788	843	-818	1185
2270	0	0	0	scaffold00002	5018614	5018866	-5480596	+	R=14	DNA/TcMar	1	253	0	1186
582	12.1	0	0	scaffold00002	5029187	5029269	-5470193	+	R=183	TE/TE_unclass	1	83	0	1187
1136	11.8	7.7	1	scaffold00002	5029559	5029754	-5469708	C	R=45	DNA/DNA_unclass	0	210	2	1188
1376	12.1	2.3	0.5	scaffold00002	5036400	5036615	-5462847	+	R=8	DNA/TcMar	1	220	0	1189
674	9.3	0	0	scaffold00002	5053024	5053109	-5446353	C	R=13	LTR/LTR_unclass	-1	88	3	1190
280	17.9	12.7	1.1	scaffold00002	5056808	5056886	-5442576	+	R=13	LTR/LTR_unclass	1	88	-1	1191
370	21	0	1.2	scaffold00002	5064325	5064406	-5435056	+	R=13	LTR/LTR_unclass	1	81	-8	1192
757	12.5	0.8	0	scaffold00002	5069557	5069676	-5429786	C	Contig17	RC/Helitron	0	482	362	1193
1566	17	3.1	2.7	scaffold00002	5069786	5070112	-5429350	C	Contig17	RC/Helitron	-154	328	1	1193
1800	8.6	4.7	2.9	scaffold00002	5086466	5086740	-5412722	C	Contig12	DNA/TcMar	0	420	141	1194
394	26.3	0	0	scaffold00002	5105824	5105922	-5393540	C	R=44	TE/TE_unclass	-114	133	35	1195
368	2.6	0.8	5.2	scaffold00002	5194705	5194825	-5304637	C	Contig1	simple_repeat	-21	336	221	1196
507	31.6	3.5	1.9	scaffold00002	5207519	5207779	-5291683	C	R=2	TE/TE_unclass	-173	760	496	1197		*
899	30	1	1	scaffold00002	5207698	5208007	-5291455	+	R=2	TE/TE_unclass	453	762	-171	1198
467	29.7	0.7	0	scaffold00002	5221879	5222033	-5277429	C	R=2	TE/TE_unclass	-226	707	552	1199		*
847	30.5	1.9	4.1	scaffold00002	5222004	5222430	-5277032	+	R=2	TE/TE_unclass	453	870	-63	1200
227	16.9	0	11.1	scaffold00002	5254440	5254499	-5244963	+	R=44	TE/TE_unclass	194	247	0	1201
419	16.5	0	10.9	scaffold00002	5271860	5271961	-5227501	+	R=30	DNA/TcMar	6	97	0	1202
372	26.8	0.7	7.3	scaffold00002	5271962	5271997	-5227465	+	R=38	DNA/DNA_unclass	21	137	-1	1203
3762	0.5	0.2	0	scaffold00002	5318965	5319391	-5180071	C	Contig31	DNA/hAT	0	428	1	1204
721	32.9	0.4	0.4	scaffold00002	5344244	5344524	-5154938	C	R=2	TE/TE_unclass	-200	733	453	1205
487	33.3	0	0	scaffold00002	5344495	5344671	-5154791	+	R=2	TE/TE_unclass	552	728	-205	1206		*
1207	0.6	0	2.4	scaffold00002	5391901	5392074	-5107388	+	Contig1	simple_repeat	1	170	-187	1207
569	12.9	11.9	0	scaffold00002	5405751	5405851	-5093611	+	R=120	TE/TE_unclass	1	113	-89	1208
526	11.6	0	0	scaffold00002	5405857	5405942	-5093520	C	R=120	TE/TE_unclass	-71	131	46	1209
1062	9.4	0	0	scaffold00002	5405949	5406086	-5093376	C	R=38	DNA/DNA_unclass	0	138	1	1210
289	15.2	0	0	scaffold00002	5406087	5406130	-5093332	C	R=120	TE/TE_unclass	-157	45	2	1209
867	16.7	2.3	1.7	scaffold00002	5447703	5447873	-5051589	+	R=107	LTR/LTR_unclass	1	172	-49	1211
870	21.3	15.5	0	scaffold00002	5448763	5449020	-5050442	C	R=29	DNA/DNA_unclass	-23	341	44	1212
315	14	0	0	scaffold00002	5453835	5453884	-5045578	C	R=53	TE/TE_unclass	-40	50	1	1213
680	1	10.3	1.4	scaffold00002	5461651	5461845	-5037617	C	Contig1	simple_repeat	-31	326	115	1214
343	8.9	2.2	0	scaffold00002	5468503	5468592	-5030870	+	Contig1	simple_repeat	43	134	-223	1215
297	0	0	0	scaffold00002	5471008	5471085	-5028377	C	Contig1	simple_repeat	-278	79	2	1216
1166	12.1	11.1	0	scaffold00002	5504146	5504343	-4995119	+	R=8	DNA/TcMar	1	220	0	1217
285	12.3	0	4.1	scaffold00002	5504344	5504389	-4995073	C	R=53	TE/TE_unclass	-46	44	1	1218
1014	5.4	11.3	0.6	scaffold00002	5526249	5526398	-4973064	C	R=44	TE/TE_unclass	-81	166	1	1219
652	6	0	0	scaffold00002	5538550	5538632	-4960830	C	R=183	TE/TE_unclass	0	83	1	1220
44518	0	0	0	scaffold00002	5547773	5552490	-4946972	C	R=11	DNA/hAT	0	4718	1	1221
3242	4.8	0.2	0	scaffold00002	5567363	5567758	-4931704	+	R=26	DNA/TcMar-Tc1	1265	1661	0	1222
540	3.2	3.6	12.6	scaffold00002	5583154	5583399	-4916063	C	Contig1	simple_repeat	-136	221	56	1223
1140	5	3	1	scaffold00002	5616969	5617168	-4882294	+	Contig1	simple_repeat	9	212	-145	1224
374	2.6	0	0	scaffold00002	5643704	5643969	-4855493	C	Contig1	simple_repeat	-22	335	70	1225
1072	28	0.3	0.9	scaffold00002	5725542	5725869	-4773593	C	R=2	TE/TE_unclass	-171	762	437	1226
1355	11.1	0.9	0.9	scaffold00002	5758696	5758905	-4740557	+	R=45	DNA/DNA_unclass	1	210	0	1227
1623	15.1	17.4	0	scaffold00002	5782319	5782635	-4716827	+	R=7	DNA/DNA_unclass	1	372	-5	1228
2212	13.8	1.4	0.3	scaffold00002	5801160	5801522	-4697940	C	R=7	DNA/DNA_unclass	-10	367	1	1229
771	7.3	1.3	9.8	scaffold00002	5806891	5807088	-4692374	C	Contig1	simple_repeat	-136	221	49	1230
907	28.6	1.2	1.8	scaffold00002	5812326	5812653	-4686809	C	R=2	TE/TE_unclass	-171	762	437	1231
485	26.2	2.8	2.8	scaffold00002	5812608	5812784	-4686678	+	R=2	TE/TE_unclass	553	729	-204	1232		*
4631	0	0.2	0	scaffold00002	5820233	5820753	-4678709	+	R=10	DNA/hAT	1	522	0	1233
521	0	5.7	0.9	scaffold00002	5839717	5839821	-4659641	+	Contig1	simple_repeat	180	289	-68	1234
915	8.8	0	0.7	scaffold00002	5855497	5855633	-4643829	+	R=8	DNA/TcMar	5	140	-80	1235
544	14.9	0	0	scaffold00002	5866831	5866917	-4632545	C	R=13	LTR/LTR_unclass	-2	87	1	1236
239	16.8	5.4	13	scaffold00002	5891173	5891411	-4608051	C	Contig1	simple_repeat	-9	348	126	1237
1226	0.6	2.8	3.3	scaffold00002	5897031	5897212	-4602250	C	Contig1	simple_repeat	-61	296	116	1238
326	25.5	1	2.1	scaffold00002	5920439	5920534	-4578928	C	R=55	TE/TE_unclass	-2	122	28	1239
604	16.9	13.5	1.1	scaffold00002	5927324	5927479	-4571983	+	R=45	DNA/DNA_unclass	36	210	0	1240
468	11.9	0	1.5	scaffold00002	5942836	5942903	-4556559	+	R=314_contig27_R=228_R=177_R=37	DNA/hAT	730	796	-22	1241
3268	0.3	0	0	scaffold00002	5994140	5994489	-4504973	+	R=200	DNA/DNA_unclass	1	350	0	1242
316	21.4	3.7	3.7	scaffold00002	6005281	6005387	-4494075	C	Contig1	simple_repeat	-138	219	113	1243		*
330	6.4	11.5	2.9	scaffold00002	6005318	6005413	-4494049	+	Contig1	simple_repeat	113	216	-141	1243
639	11.4	0	0	scaffold00002	6005622	6005709	-4493753	+	R=13	LTR/LTR_unclass	1	88	-1	1244
530	0	0	17.4	scaffold00002	6052118	6052308	-4447154	C	Contig1	simple_repeat	0	357	219	1245
737	13.4	20.3	0	scaffold00002	6092153	6092339	-4407123	C	R=102	TE/TE_unclass	-55	225	1	1246
1184	2.7	2	2	scaffold00002	6093330	6093481	-4405981	+	R=78	LTR/LTR_unclass	85	236	0	1247
610	0	0	1.3	scaffold00002	6093517	6093592	-4405870	C	R=78	LTR/LTR_unclass	-161	75	1	1248
280	11.9	1.7	0	scaffold00002	6124829	6124887	-4374575	+	R=132_R=153	LTR/LTR_unclass	353	412	-63	1249
392	4.5	0	0.9	scaffold00002	6151450	6151562	-4347900	+	Contig1	simple_repeat	5	116	-241	1250
3697	23.8	0.7	0.5	scaffold00002	6178231	6179050	-4320412	C	R=2	TE/TE_unclass	0	933	112	1251
3736	23.3	0.7	0.5	scaffold00002	6188745	6189564	-4309898	C	R=2	TE/TE_unclass	0	933	112	1252
239	1.7	0	0	scaffold00002	6211742	6211801	-4287661	C	Contig1	simple_repeat	-297	60	1	1253
250	13.7	6.3	7.7	scaffold00002	6221808	6221886	-4277576	+	Contig20_fr_R=226_R=288	RC/Helitron	53	130	-5130	1254
260	1.5	0	0	scaffold00002	6222888	6222953	-4276509	C	Contig1	simple_repeat	-243	114	49	1255
248	8.2	0	0	scaffold00002	6230893	6230953	-4268509	C	Contig1	simple_repeat	-239	118	58	1256
15612	0.1	0	0	scaffold00002	6239164	6240824	-4258638	C	R=26	DNA/TcMar-Tc1	0	1661	1	1257
287	5.4	1.1	0	scaffold00002	6252343	6252434	-4247028	C	Contig1	simple_repeat	-49	308	216	1258
411	23.9	0	0	scaffold00002	6279921	6280008	-4219454	C	R=2	TE/TE_unclass	-199	734	647	1259
414	16.9	0	0	scaffold00002	6304564	6304634	-4194828	C	R=40	TE/TE_unclass	0	71	1	1260		*
497	9.9	0	0	scaffold00002	6304610	6304680	-4194782	+	R=40	TE/TE_unclass	1	71	0	1261
243	3.3	0	0	scaffold00002	6304826	6304855	-4194607	+	Contig17	RC/Helitron	453	482	0	1262
928	8.9	0	0	scaffold00002	6384740	6384863	-4114599	+	R=8	DNA/TcMar	1	124	-96	1263
1754	12.7	11.3	0.6	scaffold00002	6385048	6385365	-4114097	C	R=29	DNA/DNA_unclass	-2	362	11	1264
3296	2.4	0	0	scaffold00002	6385367	6385740	-4113722	C	R=7	DNA/DNA_unclass	-3	374	1	1265
292	25.4	1.4	1.4	scaffold00002	6385741	6385808	-4113654	+	R=314_contig27_R=228_R=177_R=37	DNA/hAT	162	229	-589	1266
556	13.8	3.5	0	scaffold00002	6387653	6387739	-4111723	+	R=53	TE/TE_unclass	1	90	0	1267
362	23.4	3.6	0	scaffold00002	6446459	6446569	-4052893	C	Contig2	LTR/LTR_unclass	-20	176	62	1268
300	11.8	15.2	0.5	scaffold00002	6446559	6446667	-4052795	+	R=102	TE/TE_unclass	1	167	-113	1269		*
537	9.6	0	0	scaffold00002	6446711	6446783	-4052679	C	Contig2	LTR/LTR_unclass	-123	73	1	1268
12136	0	0	0.1	scaffold00002	6495356	6496671	-4002791	+	R=307	DNA/DNA_unclass	1	1314	0	1270
958	4.8	5.4	0	scaffold00002	6536719	6536885	-3962577	+	Contig1	simple_repeat	132	307	-50	1271
1045	15.7	2.1	2.1	scaffold00002	6563670	6563903	-3935559	C	Contig17	RC/Helitron	-247	235	2	1272
350	4.8	0	0	scaffold00002	6575938	6575979	-3923483	C	R=53	TE/TE_unclass	-48	42	1	1273
227	19.2	0	1.9	scaffold00002	6606415	6606467	-3892995	C	R=44	TE/TE_unclass	-2	245	194	1274
273	27.9	0.7	10.4	scaffold00002	6606967	6607114	-3892348	+	R=11	DNA/hAT	501	635	-4083	1275
247	17.6	0	0	scaffold00002	6610266	6610316	-3889146	C	R=44	TE/TE_unclass	-1	246	196	1276
2089	18.9	2.4	2.1	scaffold00002	6626643	6627059	-3872403	+	R=39	DNA/DNA_unclass	1	418	0	1277
812	6.6	11.8	0.6	scaffold00002	6635349	6635500	-3863962	C	Contig1	simple_repeat	-75	282	114	1278
881	0.7	4.5	5.2	scaffold00002	6647160	6647313	-3852149	C	Contig1	simple_repeat	-155	202	50	1279
12469	0.4	0	0	scaffold00002	6661591	6662922	-3836540	C	R=52	DNA/TcMar-Tc1	0	1332	1	1280
592	31.4	0	0.9	scaffold00002	6665546	6665757	-3833705	C	R=45	DNA/DNA_unclass	0	210	1	1281
384	12.9	1.3	6	scaffold00002	6689789	6689945	-3809517	C	Contig1	simple_repeat	-191	166	17	1282
852	3.1	3.5	3	scaffold00002	6707944	6708142	-3791320	C	Contig1	simple_repeat	0	357	158	1283
311	19.4	0	0	scaffold00002	6731992	6732053	-3767409	+	R=307	DNA/DNA_unclass	1253	1314	0	1284
998	29	1.5	1.2	scaffold00002	6742140	6742471	-3756991	C	R=2	TE/TE_unclass	-164	769	437	1285
730	29.8	3.6	4.5	scaffold00002	6742301	6742637	-3756825	+	R=2	TE/TE_unclass	430	763	-170	1285		*
351	21.9	3.7	3.7	scaffold00002	6791201	6791309	-3708153	+	R=146	TE/TE_unclass	86	194	-24	1286
225	18.3	0	0	scaffold00002	6792138	6792208	-3707254	C	Contig1	simple_repeat	-242	115	45	1287
322	25.7	0	0	scaffold00002	6800978	6801051	-3698411	+	R=53	TE/TE_unclass	1	74	-16	1288
654	17.9	0.7	1.5	scaffold00002	6802018	6802153	-3697309	C	R=44	TE/TE_unclass	-109	138	4	1289
954	0	0	0	scaffold00002	6810450	6810552	-3688910	+	Contig10_fl_Contig13	DNA/TcMar-Mariner	1	103	-1185	1290
538	1.6	0	4.7	scaffold00002	6810545	6810611	-3688851	+	Contig10_fl_Contig13	DNA/TcMar-Mariner	1225	1288	0	1291		*
897	18.9	0	11.8	scaffold00002	6867887	6868114	-3631348	+	R=8	DNA/TcMar	17	220	0	1292
693	24.6	2.1	1.6	scaffold00002	6883544	6883733	-3615729	C	R=8	DNA/TcMar	-3	217	27	1293
650	11.6	9.8	0	scaffold00002	6883926	6884037	-3615425	+	R=55	TE/TE_unclass	1	123	-1	1294		*
745	2.4	0	0	scaffold00002	6884035	6884117	-3615345	C	R=236_fl_R=279_R-234_R=130	DNA/TcMar	-1403	83	1	1295
1117	5.4	0	0	scaffold00002	6884118	6884263	-3615199	+	R=14	DNA/TcMar	108	253	0	1296
291	20.5	0.6	19.6	scaffold00002	6887061	6887218	-3612244	+	Contig17	RC/Helitron	119	251	-231	1297
2650	10	0.3	0.3	scaffold00002	6937922	6938283	-3561179	C	R=29	DNA/DNA_unclass	-2	362	1	1298
2329	12.3	2.6	0	scaffold00002	6938351	6938699	-3560763	C	R=29	DNA/DNA_unclass	-3	361	4	1299
608	13.5	0	0	scaffold00002	6939441	6939529	-3559933	+	R=53	TE/TE_unclass	2	90	0	1300
2461	21.7	1.4	1.4	scaffold00002	6970685	6971193	-3528269	C	R=2	TE/TE_unclass	-120	813	305	1301
1072	3.5	2.9	1.1	scaffold00002	6987659	6987832	-3511630	C	Contig1	simple_repeat	-159	198	22	1302
1065	20.2	0.5	1.8	scaffold00002	6992808	6993029	-3506433	C	R=8	DNA/TcMar	0	220	2	1303
1283	0	1.8	1.2	scaffold00002	7027498	7027668	-3471794	+	Contig1	simple_repeat	128	299	-58	1304
481	26.2	0.6	4.4	scaffold00002	7046838	7047001	-3452461	+	Contig2	LTR/LTR_unclass	26	183	-13	1305
770	1.6	1.4	0.3	scaffold00002	7073645	7073869	-3425593	C	Contig1	simple_repeat	0	357	162	1306
918	20	2.7	4.5	scaffold00002	7108472	7108696	-3390766	C	Contig30	LTR/Copia	-2273	228	8	1307
225	27.1	4.4	2.2	scaffold00002	7119748	7119883	-3379579	C	R=11	DNA/hAT	-4150	568	430	1308
1576	8.6	0	1.8	scaffold00002	7127068	7127291	-3372171	+	R=8	DNA/TcMar	1	220	0	1309
250	19.7	4.9	0	scaffold00002	7127443	7127503	-3371959	C	R=109_contig5	DNA/hAT	-199	157	94	1310
625	19.5	3	0.7	scaffold00002	7127550	7127683	-3371779	+	Contig2	LTR/LTR_unclass	40	176	-20	1311
226	17	0	0	scaffold00002	7132093	7132139	-3367323	+	R=44	TE/TE_unclass	199	245	-2	1312
1200	11.6	6.2	0.9	scaffold00002	7135321	7135529	-3363933	+	R=8	DNA/TcMar	1	220	0	1313
244	16.7	0	0	scaffold00002	7142970	7143023	-3356439	+	R=132_R=153	LTR/LTR_unclass	358	411	-64	1314
3582	23.5	0.5	0.4	scaffold00002	7170582	7171405	-3328057	C	R=2	TE/TE_unclass	-26	907	83	1315
3141	21.8	0.5	0.5	scaffold00002	7171801	7172456	-3327006	C	R=2	TE/TE_unclass	-152	781	126	1316
546	0.7	0	0.1	scaffold00002	7179297	7179506	-3319956	C	Contig1	simple_repeat	0	357	219	1317
3573	25.4	0.4	0.4	scaffold00002	7199355	7200186	-3299276	C	R=2	TE/TE_unclass	-28	905	74	1318
4042	21.5	0.9	1.1	scaffold00002	7200600	7201451	-3298011	C	R=2	TE/TE_unclass	0	933	83	1319
549	14.3	3.7	1.4	scaffold00002	7208102	7208236	-3291226	C	Contig1	simple_repeat	-52	305	168	1320
1031	8.2	0	0.7	scaffold00002	7225104	7225239	-3274223	+	R=38	DNA/DNA_unclass	4	138	0	1321
245	0	0	0	scaffold00002	7225221	7225247	-3274215	C	R=38	DNA/DNA_unclass	-111	27	1	1322		*
340	11.5	3	3	scaffold00002	7225701	7225834	-3273628	C	Contig1	simple_repeat	-59	298	165	1323
3757	24.2	1.1	1.4	scaffold00002	7273590	7274506	-3224956	+	R=2	TE/TE_unclass	20	933	0	1324
3794	23.4	1.1	1.2	scaffold00002	7283292	7284152	-3215310	+	R=2	TE/TE_unclass	74	933	0	1325
259	0	0	0	scaffold00002	7288117	7288184	-3211278	C	Contig1	simple_repeat	-243	114	47	1326
271	6.5	2.5	5.1	scaffold00002	7293078	7293158	-3206304	C	Contig1	simple_repeat	-230	127	49	1327
305	2.2	0	0	scaffold00002	7308276	7308365	-3191097	C	Contig1	simple_repeat	-267	90	1	1328
1617	24.1	0.7	2.9	scaffold00002	7310318	7310740	-3188722	C	R=39	DNA/DNA_unclass	-1	417	4	1329
804	12.7	0.8	0	scaffold00002	7337098	7337215	-3162247	+	Contig2	LTR/LTR_unclass	1	119	-77	1330
788	14.2	0	0	scaffold00002	7338471	7338583	-3160879	+	R=26	DNA/TcMar-Tc1	624	736	-925	1331
2560	4.6	0	1	scaffold00002	7338816	7339121	-3160341	C	R=7	DNA/DNA_unclass	0	377	75	1332
809	7.6	6.5	3.9	scaffold00002	7340007	7340130	-3159332	+	R=26	DNA/TcMar-Tc1	1534	1660	-1	1333
689	10.5	0	0	scaffold00002	7350720	7350814	-3148648	+	R=74	TE/TE_unclass	1	95	0	1334
582	13.2	9.7	0.3	scaffold00002	7353195	7353306	-3146156	C	Contig17	RC/Helitron	0	482	380	1335
304	20.8	1.9	14.7	scaffold00002	7353288	7353394	-3146068	+	R=165	TE/TE_unclass	1	95	-156	1336		*
784	19.3	0.7	0.7	scaffold00002	7353442	7353592	-3145870	C	R=165	TE/TE_unclass	-100	151	1	1337
306	19.6	0	0	scaffold00002	7356994	7357049	-3142413	+	R=314_contig27_R=228_R=177_R=37	DNA/hAT	2	57	-761	1338
734	5	3.8	5.7	scaffold00002	7382755	7382967	-3116495	C	Contig1	simple_repeat	0	357	149	1339
509	4.2	4	5.8	scaffold00002	7408966	7409140	-3090322	+	Contig1	simple_repeat	147	318	-39	1340
1377	13.7	0.5	0.9	scaffold00002	7452373	7452593	-3046869	+	R=8	DNA/TcMar	1	220	0	1341
472	8.3	6	8.7	scaffold00002	7455310	7455500	-3043962	C	Contig1	simple_repeat	-136	221	63	1342
247	18.7	3.6	7.5	scaffold00002	7500022	7500131	-2999331	C	Contig1	simple_repeat	-136	221	116	1343
1167	9.3	8	2	scaffold00002	7516420	7516606	-2982856	C	R=8	DNA/TcMar	-21	199	2	1344
275	13.5	1.5	0	scaffold00002	7520739	7520803	-2978659	C	R=132_R=153	LTR/LTR_unclass	-48	427	358	1345
234	17	4.3	0	scaffold00002	7522893	7522939	-2976523	C	Contig20_fr_R=226_R=288	RC/Helitron	-5118	142	94	1346
490	18.3	0	0	scaffold00002	7592116	7592197	-2907265	C	R=183	TE/TE_unclass	-1	82	1	1347
248	4.9	1.6	1.6	scaffold00002	7608036	7608097	-2891365	+	Contig1	simple_repeat	59	120	-237	1348
568	0	0	3.4	scaffold00002	7612802	7613023	-2886439	C	Contig1	simple_repeat	0	357	219	1349
516	23.4	0	0	scaffold00002	7615309	7615415	-2884047	+	R=314_contig27_R=228_R=177_R=37	DNA/hAT	1	107	-711	1350
329	17.8	3.2	10.2	scaffold00002	7615420	7615513	-2883949	C	R=7	DNA/DNA_unclass	-283	94	7	1351
282	13	2.2	0	scaffold00002	7615538	7615583	-2883879	+	R=314_contig27_R=228_R=177_R=37	DNA/hAT	771	817	-1	1352
1116	2.5	2.5	2.5	scaffold00002	7618004	7618206	-2881256	+	Contig1	simple_repeat	148	350	-7	1353
4535	0.8	1.9	2.1	scaffold00002	7631896	7632418	-2867044	C	R=10	DNA/hAT	0	522	1	1354
255	18.5	4	7.3	scaffold00002	7660766	7660864	-2838598	C	R=26	DNA/TcMar-Tc1	0	1661	1566	1355
1672	6.7	18.7	4.7	scaffold00002	7664465	7664763	-2834699	+	Contig9_R=103	LTR/LTR_unclass	1	339	0	1356
234	4.7	0	0	scaffold00002	7681420	7681483	-2817979	+	Contig1	simple_repeat	51	114	-243	1357		*
1385	0.5	3.6	12	scaffold00002	7681428	7681652	-2817810	C	Contig1	simple_repeat	-1	356	149	1358
1595	8.1	7.2	0	scaffold00002	7701181	7701403	-2798059	C	R=44	TE/TE_unclass	-8	239	1	1359
497	1.5	0.7	0.7	scaffold00002	7704552	7704689	-2794773	+	Contig1	simple_repeat	219	356	-1	1360
542	0.3	0.1	4.5	scaffold00002	7714649	7714948	-2784514	+	Contig1	simple_repeat	216	357	0	1361
473	2	0	1.7	scaffold00002	7720510	7720676	-2778786	C	Contig1	simple_repeat	0	357	211	1362
1462	0.6	0	0	scaffold00002	7724558	7724714	-2774748	C	R=121	LTR/LTR_unclass	0	157	1	1363
2718	33.6	2.9	2.7	scaffold00002	7724794	7726269	-2773193	+	R=212	LTR/Copia	245	1723	-2730	1364
348	27.1	4.8	4.8	scaffold00002	7729221	7729429	-2770033	C	Contig23fr	LTR/Gypsy	-2372	3103	2895	1365
251	32.6	7.4	7.4	scaffold00002	7730914	7731291	-2768171	+	R=21	LTR/Gypsy	4145	4522	-4137	1366
3271	31.1	4.6	5.7	scaffold00002	7735340	7737494	-2761968	+	R=212	LTR/Copia	2167	4298	-155	1367
1462	0.6	0	0	scaffold00002	7737495	7737651	-2761811	C	R=121	LTR/LTR_unclass	0	157	1	1368
466	12	4	0	scaffold00002	7768600	7768674	-2730788	+	R=183	TE/TE_unclass	4	81	-2	1369
770	16	7.5	3.6	scaffold00002	7768804	7768991	-2730471	C	R=8	DNA/TcMar	-18	202	8	1370
898	18	22.4	0.7	scaffold00002	7813350	7813590	-2685872	C	R=109_contig5	DNA/hAT	0	356	64	1371
246	4.2	0	0	scaffold00002	7832369	7832464	-2666998	+	Contig1	simple_repeat	21	116	-241	1372
2389	26.2	2.7	2.4	scaffold00002	7846116	7846826	-2652636	+	R=2	TE/TE_unclass	221	933	0	1373
999	0	1.7	2.2	scaffold00002	7847585	7847764	-2651698	+	Contig1	simple_repeat	171	349	-8	1374
2576	26.8	2.7	2.4	scaffold00002	7851219	7852024	-2647438	C	R=2	TE/TE_unclass	0	933	125	1375
284	20	0	0	scaffold00002	7916743	7916802	-2582660	C	Contig15_fr	DNA/TcMar-Tc1	0	501	442	1376
352	20.6	0	0	scaffold00002	7916804	7916871	-2582591	+	R=45	DNA/DNA_unclass	1	68	-142	1377
501	13.2	14.8	1.6	scaffold00002	7916892	7916999	-2582463	C	Contig15_fr	DNA/TcMar-Tc1	-87	414	293	1376
254	16.3	0	0	scaffold00002	7917002	7917044	-2582418	+	R=14	DNA/TcMar	211	253	0	1378
1087	4.6	0.6	4	scaffold00002	7926132	7926312	-2573150	+	Contig1	simple_repeat	27	201	-156	1379
686	15.5	0.9	0	scaffold00002	7953475	7953590	-2545872	+	R=38	DNA/DNA_unclass	1	117	-21	1380
1302	11.8	3.7	3.2	scaffold00002	7954221	7954438	-2545024	C	R=8	DNA/TcMar	-1	219	1	1381
711	1.7	1.7	0	scaffold00002	7986609	7986725	-2512737	+	Contig1	simple_repeat	27	145	-212	1382
248	11.8	0	0	scaffold00002	7990053	7990086	-2509376	C	R=53	TE/TE_unclass	0	90	57	1383
245	23	2.7	1.3	scaffold00002	8006545	8006619	-2492843	+	R=132_R=153	LTR/LTR_unclass	340	415	-60	1384
314	11.5	1.9	0	scaffold00002	8006766	8006817	-2492645	C	R=38	DNA/DNA_unclass	-1	137	85	1385
621	6.2	0	0	scaffold00002	8019277	8019357	-2480105	+	R=13	LTR/LTR_unclass	9	89	0	1386
1688	29	0.4	0.4	scaffold00002	8032653	8033158	-2466304	+	R=2	TE/TE_unclass	428	933	0	1387
720	4.5	0	0	scaffold00002	8041666	8041754	-2457708	+	R=13	LTR/LTR_unclass	1	89	0	1388
330	7.5	26.9	0	scaffold00002	8044534	8044600	-2454862	C	R=13	LTR/LTR_unclass	0	89	5	1389
261	4.1	0	1	scaffold00002	8063910	8064008	-2435454	+	Contig1	simple_repeat	19	116	-241	1390
376	4.2	0	0	scaffold00002	8090404	8090451	-2409011	+	Contig17	RC/Helitron	1	48	-434	1391
1355	12.3	0	2.7	scaffold00002	8112382	8112607	-2386855	C	R=8	DNA/TcMar	0	220	1	1392
324	33.3	3.8	3.1	scaffold00002	8175944	8176259	-2323203	+	R=52	DNA/TcMar-Tc1	217	534	-798	1393
416	1.3	0	5.2	scaffold00002	8190518	8190598	-2308864	+	Contig1	simple_repeat	55	131	-226	1394
313	5.4	0	0	scaffold00002	8214408	8214444	-2285018	+	Contig15_fr	DNA/TcMar-Tc1	465	501	0	1395
228	17.6	0	7	scaffold00002	8228498	8228558	-2270904	C	R=102	TE/TE_unclass	-117	163	107	1396
919	3.9	4	7.2	scaffold00002	8272704	8272978	-2226484	C	Contig1	simple_repeat	0	357	115	1397
616	2.1	0.5	1.6	scaffold00002	8272978	8273169	-2226293	C	Contig1	simple_repeat	0	357	210	1398		*
487	17.9	1.2	14.7	scaffold00002	8293073	8293242	-2206220	C	R=109_contig5	DNA/hAT	0	356	207	1399
362	22.4	0	0	scaffold00002	8298389	8298473	-2200989	C	R=13	LTR/LTR_unclass	-1	88	4	1400
3954	1.5	4.6	0	scaffold00002	8314001	8314461	-2185001	+	Contig17	RC/Helitron	1	482	0	1401
460	5.6	6.9	0	scaffold00002	8328819	8328890	-2170572	C	Contig17	RC/Helitron	-405	77	1	1402
226	21.7	0	0	scaffold00002	8340861	8340906	-2158556	+	R=44	TE/TE_unclass	198	243	-4	1403
246	6.1	0	0	scaffold00002	8349499	8349547	-2149915	+	Contig1	simple_repeat	69	117	-240	1404
1004	1.7	7.4	0	scaffold00002	8361314	8361488	-2137974	+	Contig1	simple_repeat	33	220	-137	1405
1153	5.8	0	0	scaffold00002	8377186	8377323	-2122139	C	R=38	DNA/DNA_unclass	0	138	1	1406
41758	0	0	0	scaffold00002	8459405	8463857	-2035605	C	R=212	LTR/Copia	0	4453	1	1407
1532	5.9	0	0	scaffold00002	8468710	8468913	-2030549	+	Contig1	simple_repeat	18	221	-136	1408
1018	0	0	0	scaffold00002	8468830	8468961	-2030501	C	Contig1	simple_repeat	-136	221	114	1409		*
499	0	0	0	scaffold00002	8468918	8468970	-2030492	+	Contig1	simple_repeat	114	166	-191	1410		*
243	0	3.5	0	scaffold00002	8469109	8469137	-2030325	+	Contig1	simple_repeat	117	146	-211	1411
384	9.2	12.3	0	scaffold00002	8524259	8524323	-1975139	C	R=14	DNA/TcMar	0	253	181	1412
323	5.1	0	0	scaffold00002	8525333	8525371	-1974091	+	Contig15_fr	DNA/TcMar-Tc1	463	501	0	1413
922	18.6	1	2	scaffold00002	8534065	8534262	-1965200	C	Contig2	LTR/LTR_unclass	0	196	1	1414
484	12.8	1.1	6.6	scaffold00002	8571207	8571382	-1928080	+	Contig1	simple_repeat	55	221	-136	1415
573	0.6	0.1	0.6	scaffold00002	8577183	8577358	-1922104	C	Contig1	simple_repeat	0	357	219	1416
412	15.8	17.1	0	scaffold00002	8580306	8580381	-1919081	+	R=13	LTR/LTR_unclass	1	89	0	1417
566	5.6	6.9	1.3	scaffold00002	8599719	8599863	-1899599	C	Contig1	simple_repeat	-147	210	58	1418
258	0	0	0	scaffold00002	8602546	8602616	-1896846	+	Contig1	simple_repeat	1	71	-286	1419
2389	27.8	3	2.9	scaffold00002	8611767	8612640	-1886822	C	R=2	TE/TE_unclass	-23	910	36	1420
452	17.2	3.5	0	scaffold00002	8618199	8618285	-1881177	+	R=8	DNA/TcMar	59	148	-72	1421
2420	27.9	2.9	2.8	scaffold00002	8622995	8623885	-1875577	C	R=2	TE/TE_unclass	-6	927	36	1422
241	22.3	6.5	4.5	scaffold00002	8659001	8659108	-1840354	C	R=236_fl_R=279_R-234_R=130	DNA/TcMar	-185	1301	1192	1423
477	11.2	1.7	2.5	scaffold00002	8677320	8677438	-1822024	C	Contig1	simple_repeat	-80	277	160	1424
556	8.2	0	0	scaffold00002	8681575	8681647	-1817815	+	R=30	DNA/TcMar	1	73	-24	1425
522	21.1	11.4	0	scaffold00002	8681648	8681694	-1817768	+	R=38	DNA/DNA_unclass	4	137	-1	1426
1094	12.9	7.5	0	scaffold00002	8719816	8720001	-1779461	+	R=8	DNA/TcMar	8	207	-13	1427
364	20.5	15.8	1	scaffold00002	8720199	8720374	-1779088	C	Contig31	DNA/hAT	-166	262	16	1428
2769	29	2.4	2.5	scaffold00002	8736465	8737386	-1762076	C	R=2	TE/TE_unclass	-12	921	1	1429
438	18	5	0	scaffold00002	8757680	8757779	-1741683	C	R=55	TE/TE_unclass	-1	123	19	1430
1225	12.4	4.5	2.5	scaffold00002	8757878	8758076	-1741386	C	R=146	TE/TE_unclass	-15	203	1	1431
243	8.6	0	0	scaffold00002	8763103	8763137	-1736325	+	R=44	TE/TE_unclass	209	243	-4	1432
319	11.9	29.9	0	scaffold00002	8781039	8781105	-1718357	+	R=13	LTR/LTR_unclass	2	88	-1	1433
278	1	0	1	scaffold00002	8793320	8793422	-1706040	+	Contig1	simple_repeat	2	103	-254	1434
2567	26.9	0.3	0.3	scaffold00002	8794426	8795044	-1704418	C	R=2	TE/TE_unclass	-11	922	304	1435
448	32.1	2.2	2.2	scaffold00002	8795125	8795347	-1704115	C	R=2	TE/TE_unclass	-710	223	1	1435
433	23.6	2.6	2.6	scaffold00002	8795513	8795625	-1703837	C	R=2	TE/TE_unclass	-492	441	329	1436
486	18	0	0	scaffold00002	8814835	8814923	-1684539	C	R=13	LTR/LTR_unclass	0	89	1	1437
225	14.9	0	0	scaffold00002	8818172	8818218	-1681244	C	Contig1	simple_repeat	-228	129	83	1438
292	3.7	1.1	7.2	scaffold00002	8818260	8818347	-1681115	C	Contig1	simple_repeat	-162	195	113	1439		*
1055	9.1	0.4	6.5	scaffold00002	8818270	8818529	-1680933	+	Contig1	simple_repeat	113	357	0	1440
3302	2.6	0	0	scaffold00002	8823843	8824219	-1675243	+	R=7	DNA/DNA_unclass	1	377	0	1441
258	31.6	4.1	4.1	scaffold00002	8839886	8840106	-1659356	+	R=256_R=291_R=305_R=277	LTR/Copia	336	556	-5670	1442
1786	34	4	4	scaffold00002	8840494	8841935	-1657527	+	R=256_R=291_R=305_R=277	LTR/Copia	919	2360	-3866	1442
3979	31.8	0.9	0.9	scaffold00002	8842354	8843844	-1655618	+	R=256_R=291_R=305_R=277	LTR/Copia	2692	4183	-2043	1442
757	5.4	3.7	1.6	scaffold00002	8871325	8871513	-1627949	C	Contig1	simple_repeat	-6	351	159	1443
1157	8.4	1.6	13.1	scaffold00002	8888455	8888701	-1610761	C	Contig1	simple_repeat	-22	335	114	1444
666	1	1.6	19.4	scaffold00002	8888595	8888721	-1610741	+	Contig1	simple_repeat	114	221	-136	1445		*
322	11.2	6.8	6	scaffold00002	8907833	8907965	-1591497	C	Contig1	simple_repeat	-91	266	133	1446
340	10.2	0	0	scaffold00002	8937509	8937557	-1561905	+	Contig15_fr	DNA/TcMar-Tc1	453	501	0	1447
1547	9.8	1.4	0	scaffold00002	8937707	8937921	-1561541	C	R=8	DNA/TcMar	0	220	3	1448
257	11.8	0	1.5	scaffold00002	8942837	8942905	-1556557	+	Contig1	simple_repeat	54	121	-236	1449
660	9.2	0	0	scaffold00002	8959483	8959569	-1539893	C	R=109_contig5	DNA/hAT	-269	87	1	1450
613	3.8	8.9	1.4	scaffold00002	8996860	8996994	-1502468	+	Contig1	simple_repeat	146	290	-67	1451
568	0.1	0	3.8	scaffold00002	9001373	9001623	-1497839	+	Contig1	simple_repeat	219	357	0	1452
241	3.1	0	0	scaffold00002	9001569	9001632	-1497830	C	Contig1	simple_repeat	-243	114	51	1453		*
938	18.4	7.5	0	scaffold00002	9024443	9024654	-1474808	C	Contig30	LTR/Copia	-2273	228	1	1454
1917	18.2	2.3	4.5	scaffold00002	9031515	9031899	-1467563	+	R=7	DNA/DNA_unclass	1	377	0	1455
4219	26.6	1.7	1.8	scaffold00002	9039193	9040508	-1458954	C	R=307	DNA/DNA_unclass	0	1314	1	1456
347	10.6	0	0	scaffold00002	9054062	9054108	-1445354	+	R=30	DNA/TcMar	1	47	-50	1457
281	22.9	1.6	0	scaffold00002	9054109	9054119	-1445343	+	R=38	DNA/DNA_unclass	4	62	-76	1458
502	18.2	0.9	6.6	scaffold00002	9054940	9055051	-1444411	C	R=7	DNA/DNA_unclass	0	377	272	1459
1538	20.8	0.8	4.6	scaffold00002	9060435	9060796	-1438666	+	R=7	DNA/DNA_unclass	4	352	-25	1460
369	17.7	0	0	scaffold00002	9062634	9062695	-1436767	C	R=7	DNA/DNA_unclass	0	377	316	1461
970	17.9	1	3.5	scaffold00002	9062710	9062912	-1436550	C	R=7	DNA/DNA_unclass	-176	201	4	1459
1149	19.6	1.9	3.5	scaffold00002	9065113	9065371	-1434091	C	R=7	DNA/DNA_unclass	-107	270	16	1462
1549	19.4	2.5	3.9	scaffold00002	9084928	9085287	-1414175	C	R=7	DNA/DNA_unclass	-22	355	1	1463
2433	4.7	5.7	4.4	scaffold00002	9089301	9089635	-1409827	C	Contig9_R=103	LTR/LTR_unclass	0	339	1	1464
1636	9	17.8	6.2	scaffold00002	9089781	9090101	-1409361	C	R=109_contig5	DNA/hAT	0	356	1	1465
1992	1.7	1.3	1.3	scaffold00002	9101359	9101594	-1397868	+	R=78	LTR/LTR_unclass	1	236	0	1466
352	2.1	4.2	0	scaffold00002	9101794	9101841	-1397621	+	R=102	TE/TE_unclass	1	50	-230	1467
1726	2.5	0	0	scaffold00002	9101899	9102094	-1397368	+	Contig2	LTR/LTR_unclass	1	196	0	1468
968	17.8	1	2.6	scaffold00002	9105747	9105942	-1393520	C	R=7	DNA/DNA_unclass	-184	193	1	1469
1484	19.6	2	4	scaffold00002	9107155	9107510	-1391952	C	R=7	DNA/DNA_unclass	-25	352	4	1470
1483	19	2.8	4.5	scaffold00002	9115073	9115430	-1384032	C	R=7	DNA/DNA_unclass	-22	355	4	1471
435	32	4.5	3.6	scaffold00002	9123728	9124061	-1375401	C	R=296	LTR/Copia	-295	338	2	1472
653	17.2	4.7	0.8	scaffold00002	9130226	9130354	-1369108	+	R=7	DNA/DNA_unclass	241	374	-3	1473
1004	17.8	0.5	3.6	scaffold00002	9139920	9140117	-1359345	+	R=7	DNA/DNA_unclass	1	192	-185	1474
2177	0.8	0.4	0	scaffold00002	9143684	9143934	-1355528	+	Contig33_R=163	TE/TE_unclass	1	252	0	1475
2290	35	1.4	1.1	scaffold00002	9146194	9147438	-1352024	C	R=134	LTR/Copia	0	4083	2836	1476
1094	35.9	2.5	3.1	scaffold00002	9147940	9149150	-1350312	C	R=134	LTR/Copia	-1617	2466	1263	1476
1294	29.9	3.3	2.8	scaffold00002	9149541	9150115	-1349347	C	R=134	LTR/Copia	-3060	1023	446	1476
2177	0.8	0.4	0	scaffold00002	9150870	9151120	-1348342	+	Contig33_R=163	TE/TE_unclass	1	252	0	1477
3840	0.2	0	0	scaffold00002	9151132	9151544	-1347918	+	R=95	LTR/LTR_unclass	1	413	0	1478
2502	0.4	0.4	0	scaffold00002	9152373	9152644	-1346818	+	R=181_R=62	LTR/LTR_unclass	1	273	0	1479
367	37.2	1.3	2.4	scaffold00002	9156760	9157059	-1342403	+	Contig23fr	LTR/Gypsy	1315	1611	-3864	1480
392	36.2	1.8	2	scaffold00002	9158347	9158791	-1340671	C	R=21	LTR/Gypsy	-5999	2660	2217	1481
323	0	0	0	scaffold00002	9161419	9161460	-1338002	+	R=181_R=62	LTR/LTR_unclass	1	42	-231	1482		*
3682	31.6	4	2.9	scaffold00002	9161459	9163121	-1336341	C	Contig28	LTR/Copia	-1226	2994	1314	1483
1666	21.1	4.9	2.3	scaffold00002	9163463	9163592	-1335870	C	Contig28	LTR/Copia	-3195	1025	885	1484
3861	0	0	0	scaffold00002	9163593	9164005	-1335457	+	R=95	LTR/LTR_unclass	1	413	0	1485
994	0	7.2	0.5	scaffold00002	9169163	9169355	-1330107	+	Contig1	simple_repeat	15	220	-137	1486
253	1.5	0	0	scaffold00002	9187051	9187117	-1312345	C	Contig1	simple_repeat	-241	116	50	1487		*
477	0	2	5.2	scaffold00002	9187117	9187215	-1312247	C	Contig1	simple_repeat	-143	214	119	1488		*
676	11.1	0	22.8	scaffold00002	9187128	9187348	-1312114	+	Contig1	simple_repeat	114	293	-64	1489
1243	15.5	0.4	2.2	scaffold00002	9210392	9210622	-1288840	+	R=7	DNA/DNA_unclass	148	374	-3	1490
1461	6.6	0	0	scaffold00002	9228036	9228231	-1271231	C	R=14	DNA/TcMar	0	253	58	1491
703	9.9	0	0	scaffold00002	9228230	9228330	-1271132	+	Contig15_fr	DNA/TcMar-Tc1	401	501	0	1492		*
3934	0	0	0	scaffold00002	9240055	9240472	-1258990	+	R=39	DNA/DNA_unclass	1	418	0	1493
916	0.8	0	11.6	scaffold00002	9241626	9241760	-1257702	+	Contig28	LTR/Copia	1	121	-4099	1494
225	9.5	9.5	0	scaffold00002	9249233	9249274	-1250188	+	Contig28	LTR/Copia	928	973	-3247	1495
309	34.1	5.5	4.6	scaffold00002	9251459	9252067	-1247395	+	R=256_R=291_R=305_R=277	LTR/Copia	1655	2272	-2328	1496
256	33.4	8.1	5.6	scaffold00002	9251734	9252114	-1247348	+	Contig28	LTR/Copia	3301	3690	-530	1497		*
672	34.4	2.2	4.3	scaffold00002	9252467	9252959	-1246503	+	R=256_R=291_R=305_R=277	LTR/Copia	2687	3169	-3057	1496
3072	3.8	0.6	9.1	scaffold00002	9256859	9257313	-1242149	+	R=132_R=153	LTR/LTR_unclass	1	475	0	1498
5416	0.5	0	0	scaffold00002	9262059	9262651	-1236811	C	Contig8	LTR/LTR_unclass	0	593	1	1499
226	27.3	0	0	scaffold00002	9264532	9264586	-1234876	C	R=256_R=291_R=305_R=277	LTR/Copia	-480	5746	5692	1500
1021	34.1	1.8	2.3	scaffold00002	9266027	9266641	-1232821	C	R=256_R=291_R=305_R=277	LTR/Copia	-2068	4158	3547	1501
999	33.5	2.5	3.4	scaffold00002	9266802	9267512	-1231950	C	R=256_R=291_R=305_R=277	LTR/Copia	-2831	3395	2691	1501
388	31.8	4.9	6.5	scaffold00002	9267878	9268267	-1231195	C	R=191	LTR/Copia	-2283	2317	1934	1502
270	29.9	1.7	2.5	scaffold00002	9269008	9269127	-1230335	C	R=256_R=291_R=305_R=277	LTR/Copia	-4980	1246	1128	1501
234	11.1	2.8	0	scaffold00002	9270102	9270120	-1229342	C	Contig28	LTR/Copia	-3263	957	938	1503
5416	0.5	0	0	scaffold00002	9270121	9270713	-1228749	C	Contig8	LTR/LTR_unclass	0	593	1	1504
332	19.5	3.5	4.7	scaffold00002	9327031	9327116	-1172346	C	R=314_contig27_R=228_R=177_R=37	DNA/hAT	-5	813	729	1505
516	15.5	0	0	scaffold00002	9327159	9327242	-1172220	C	R=8	DNA/TcMar	0	220	137	1506
1323	0	0	0	scaffold00002	9327244	9327385	-1172077	C	R=134	LTR/Copia	-3941	142	1	1507
38009	0	0	0.1	scaffold00002	9329694	9333781	-1165681	C	R=134	LTR/Copia	0	4083	1	1508
603	23.8	0	0.8	scaffold00002	9333820	9333946	-1165516	C	R=8	DNA/TcMar	-94	126	1	1506
1963	13.4	1.8	8	scaffold00002	9334011	9334406	-1165056	C	Contig17	RC/Helitron	0	482	110	1509
757	11.7	0.8	0	scaffold00002	9334497	9334616	-1164846	+	Contig17	RC/Helitron	362	482	0	1510
739	12.6	0.9	0	scaffold00002	9347711	9347821	-1151641	+	R=314_contig27_R=228_R=177_R=37	DNA/hAT	1	112	-706	1511
852	18.4	16.6	0.9	scaffold00002	9347870	9348056	-1151406	+	R=314_contig27_R=228_R=177_R=37	DNA/hAT	565	780	-38	1512
385	5.1	3	2.8	scaffold00002	9354466	9354662	-1144800	C	R=132_R=153	LTR/LTR_unclass	-11	464	366	1513
573	0	0	0.3	scaffold00002	9358059	9358229	-1141233	C	Contig1	simple_repeat	0	357	219	1514
278	6.9	0	0	scaffold00002	9358431	9358517	-1140945	+	Contig1	simple_repeat	2	88	-269	1515
273	17.6	0	0.3	scaffold00002	9412920	9412973	-1086489	C	R=132_R=153	LTR/LTR_unclass	-56	419	366	1516
294	20.8	15.3	0	scaffold00002	9468780	9468851	-1030611	C	R=183	TE/TE_unclass	0	83	1	1517
301	13.8	21.5	0	scaffold00002	9475468	9475532	-1023930	C	R=14	DNA/TcMar	0	253	175	1518
757	3.5	0	0	scaffold00002	9491368	9491454	-1008008	C	R=13	LTR/LTR_unclass	-2	87	1	1519
538	0.2	0	8.1	scaffold00002	9499074	9499275	-1000187	+	Contig1	simple_repeat	219	357	0	1520
230	1.6	0	0	scaffold00002	9499219	9499282	-1000180	C	Contig1	simple_repeat	-243	114	51	1521		*
401	18.4	4	0	scaffold00002	9517155	9517230	-982232	+	R=236_fl_R=279_R-234_R=130	DNA/TcMar	1408	1486	0	1522
247	1.6	0	0	scaffold00002	9532458	9532519	-966943	+	Contig1	simple_repeat	2	63	-294	1523
368	3.1	0	0	scaffold00002	9570097	9570194	-929268	+	Contig1	simple_repeat	19	116	-241	1524
364	22.1	0	0	scaffold00002	9580696	9580763	-918699	+	R=191	LTR/Copia	1073	1140	-3460	1525
801	34.5	5.1	3.4	scaffold00002	9581007	9581932	-917530	+	R=191	LTR/Copia	1390	2330	-2270	1526
501	31.7	0.5	1.1	scaffold00002	9589758	9589945	-909517	C	R=2	TE/TE_unclass	-202	731	545	1527
425	34.9	2.3	2.3	scaffold00002	9589909	9590216	-909246	+	R=2	TE/TE_unclass	454	761	-172	1528		*
1035	9.4	0	0	scaffold00002	9601975	9602112	-897350	+	R=38	DNA/DNA_unclass	1	138	0	1529
882	0	5.8	3.1	scaffold00002	9602788	9602975	-896487	+	Contig1	simple_repeat	135	327	-30	1530
3519	7.8	5.7	0.6	scaffold00002	9619107	9619582	-879880	+	Contig10_fl_Contig13	DNA/TcMar-Mariner	1	500	-788	1531
1741	10.8	0.4	4.2	scaffold00002	9619579	9619848	-879614	+	Contig10_fl_Contig13	DNA/TcMar-Mariner	1029	1288	0	1532		*
968	19.3	0.4	6.8	scaffold00002	9656027	9656260	-843202	+	R=8	DNA/TcMar	1	220	0	1533
1817	16.3	1.9	4.4	scaffold00002	9739449	9739820	-759642	+	R=26	DNA/TcMar-Tc1	19	381	-1280	1534		*
2234	13.3	9.6	1.4	scaffold00002	9739808	9740203	-759259	+	R=26	DNA/TcMar-Tc1	1234	1661	0	1535
506	17.1	0	0	scaffold00002	9769072	9769159	-730303	C	R=13	LTR/LTR_unclass	-1	88	1	1536
752	14.2	0.8	0	scaffold00002	9816743	9816862	-682600	C	Contig17	RC/Helitron	0	482	362	1537
4872	0	0.2	0	scaffold00002	9817314	9817834	-681628	C	R=10	DNA/hAT	0	522	1	1538
1114	0.6	5	1.1	scaffold00002	9830102	9830283	-669179	C	Contig1	simple_repeat	-45	312	124	1539
3709	26	0.7	0.7	scaffold00002	9837931	9838845	-660617	+	R=2	TE/TE_unclass	8	922	-11	1540
255	0	0	1.1	scaffold00002	9841596	9841685	-657777	C	Contig1	simple_repeat	-241	116	28	1541
550	28.7	0	0	scaffold00002	9847269	9847404	-652058	C	R=7	DNA/DNA_unclass	-5	372	237	1542
3325	2.4	0	0	scaffold00002	9881118	9881494	-617968	+	R=7	DNA/DNA_unclass	1	377	0	1543
1665	15.1	0.4	0.4	scaffold00002	9883036	9883308	-616154	C	R=7	DNA/DNA_unclass	0	377	105	1544
1111	26.8	9.1	0.3	scaffold00002	9883305	9883611	-615851	+	R=2	TE/TE_unclass	132	465	-468	1545		*
3942	22.6	0.8	0.7	scaffold00002	9884115	9884958	-614504	+	R=2	TE/TE_unclass	78	922	-11	1546
3648	24	0.6	0.8	scaffold00002	9886390	9887213	-612249	+	R=2	TE/TE_unclass	81	902	-31	1547
3737	25.2	0.7	0.6	scaffold00002	9889553	9890446	-609016	+	R=2	TE/TE_unclass	12	906	-27	1548
411	17.6	0	0	scaffold00002	9923170	9923237	-576225	+	R=10	DNA/hAT	1	68	-454	1549
821	21.9	15.3	0	scaffold00002	9923246	9923460	-576002	+	R=10	DNA/hAT	161	408	-114	1550
331	7	0	0	scaffold00002	9923531	9923573	-575889	C	Contig31	DNA/hAT	-383	45	3	1551
255	11.1	0	0	scaffold00002	9929841	9929876	-569586	+	R=38	DNA/DNA_unclass	103	138	0	1552
3582	22.7	0.8	0.9	scaffold00002	10000380	10001149	-498313	C	R=2	TE/TE_unclass	-122	811	43	1553
811	10.6	4.9	0.7	scaffold00002	10042778	10042919	-456543	+	Contig17	RC/Helitron	3	150	-332	1554
1001	16.1	0.5	5.5	scaffold00002	10042920	10043110	-456352	+	R=109_contig5	DNA/hAT	1	182	-174	1555
233	26	2.1	0	scaffold00002	10065472	10065567	-433895	+	R=11	DNA/hAT	493	590	-4128	1556
709	4.3	4.8	4.1	scaffold00002	10069263	10069408	-430054	+	Contig1	simple_repeat	66	212	-145	1557
1111	0	0.5	25.9	scaffold00002	10094585	10094792	-404670	+	Contig1	simple_repeat	54	219	-138	1558
411	6.8	2.7	28.1	scaffold00002	10098767	10098992	-400470	+	Contig1	simple_repeat	109	256	-101	1559
272	11.1	0	0	scaffold00002	10129544	10129579	-369883	C	Contig19	DNA/TcMar	0	332	297	1560
312	2.4	0	0	scaffold00002	10142845	10142927	-356535	+	Contig1	simple_repeat	1	83	-274	1561
427	3.5	0	0	scaffold00002	10182956	10183069	-316393	+	Contig1	simple_repeat	1	114	-243	1562		*
893	2.7	1	8.1	scaffold00002	10182973	10183171	-316291	C	Contig1	simple_repeat	0	357	172	1563
355	23.1	4	5.8	scaffold00002	10193274	10193448	-306014	+	Contig17	RC/Helitron	3	174	-308	1564
468	7.9	0	0	scaffold00002	10232641	10232703	-266759	C	R=8	DNA/TcMar	0	220	158	1565
479	11.8	4.2	0	scaffold00002	10232705	10232833	-266629	+	R=102	TE/TE_unclass	2	170	-110	1566
765	14.5	7.2	0	scaffold00002	10232848	10232985	-266477	C	R=8	DNA/TcMar	-63	157	10	1565
417	7	1.8	0	scaffold00002	10236493	10236549	-262913	C	R=14	DNA/TcMar	0	253	196	1567
830	15.7	13.3	1.4	scaffold00002	10254448	10254635	-244827	C	R=45	DNA/DNA_unclass	0	210	1	1568
771	19.8	0.5	13.4	scaffold00002	10257858	10258067	-241395	C	R=44	TE/TE_unclass	-57	190	5	1569
360	22.1	0	0	scaffold00002	10261297	10261364	-238098	+	R=191	LTR/Copia	1073	1140	-3460	1570
775	34	5	3.8	scaffold00002	10261780	10262533	-236929	+	R=191	LTR/Copia	1568	2330	-2270	1571
617	18.4	6.7	4.2	scaffold00002	10274343	10274506	-224956	+	R=8	DNA/TcMar	53	220	0	1572
340	3.4	0	0.5	scaffold00002	10275279	10275382	-224080	+	Contig1	simple_repeat	2	103	-254	1573
966	10.1	0	0	scaffold00002	10276394	10276531	-222931	C	R=38	DNA/DNA_unclass	0	138	1	1574
37345	0	0	0.2	scaffold00002	10294224	10298443	-201019	C	Contig26_fr_R=289_R=204	LTR/Copia	0	4210	1	1575
1495	9.1	0	1.9	scaffold00002	10330491	10330704	-168758	C	R=45	DNA/DNA_unclass	0	210	1	1576
1533	5.8	1.4	2.4	scaffold00002	10337782	10337993	-161469	+	R=45	DNA/DNA_unclass	1	210	0	1577
1300	11	1	2.5	scaffold00002	10338402	10338606	-160856	+	R=45	DNA/DNA_unclass	2	203	-7	1578
489	13.7	0	0	scaffold00002	10338643	10338715	-160747	C	R=53	TE/TE_unclass	-7	83	11	1579
919	7.6	2.3	0	scaffold00002	10338716	10338847	-160615	C	Contig15_fr	DNA/TcMar-Tc1	-2	499	365	1580
1634	6.2	0	0	scaffold00002	10342347	10342554	-156908	+	R=45	DNA/DNA_unclass	3	210	0	1581
330	21	0	0	scaffold00002	10357233	10357294	-142168	+	R=44	TE/TE_unclass	12	73	-174	1582
254	0	0	0	scaffold00002	10386494	10386563	-112899	+	Contig1	simple_repeat	1	70	-287	1583
230	12.3	1.4	0	scaffold00002	10393735	10393807	-105655	C	Contig1	simple_repeat	-69	288	215	1584
546	0.7	0.2	0.4	scaffold00002	10440588	10440772	-58690	+	Contig1	simple_repeat	209	357	0	1585
317	24.7	5	2.9	scaffold00002	10444688	10444787	-54675	C	R=193	TE/TE_unclass	0	102	1	1586
815	5.1	5	3	scaffold00002	10446751	10446911	-52551	C	Contig1	simple_repeat	-78	279	116	1587
242	8.1	0	1.4	scaffold00002	10449504	10449578	-49884	C	Contig1	simple_repeat	-238	119	46	1588
326	0	3.3	3.3	scaffold00002	10449711	10449771	-49691	C	Contig1	simple_repeat	-219	138	78	1589
525	31.1	1.4	1.9	scaffold00002	10491997	10492209	-7253	C	R=2	TE/TE_unclass	-170	763	552	1590		*
791	30.2	0.6	1.8	scaffold00002	10492155	10492488	-6974	+	R=2	TE/TE_unclass	431	760	-173	1591
2047	0	0	0	scaffold00003	115	335	-3663563	+	R=107	LTR/LTR_unclass	1	221	0	1592
699	18.3	0	2.9	scaffold00003	5481	5621	-3658277	C	R=8	DNA/TcMar	-3	217	81	1593
1451	7.3	1.6	0	scaffold00003	5713	5903	-3657995	C	R=45	DNA/DNA_unclass	-16	194	1	1594
801	2.1	3.5	4	scaffold00003	42206	42405	-3621493	C	Contig1	simple_repeat	-2	355	157	1595
440	19.2	0.9	3.8	scaffold00003	85930	86037	-3577861	+	R=78	LTR/LTR_unclass	1	105	-131	1596
673	7.6	3.2	7.3	scaffold00003	126464	126620	-3537278	+	Contig1	simple_repeat	57	207	-150	1597
312	1.4	0	0	scaffold00003	126660	126728	-3537170	+	Contig1	simple_repeat	47	115	-242	1598
6695	0.3	0	0	scaffold00003	206963	207676	-3456222	C	R=69	TE/TE_unclass	0	714	1	1599
450	9.5	0	1.6	scaffold00003	246264	246327	-3417571	+	R=44	TE/TE_unclass	1	63	-184	1600
541	11.7	9	0	scaffold00003	325316	325538	-3338360	C	Contig1	simple_repeat	0	357	115	1601
339	2.4	0	1.2	scaffold00003	325574	325657	-3338241	+	Contig1	simple_repeat	33	115	-242	1602
1379	14.2	0	0.5	scaffold00003	340618	340837	-3323061	C	R=8	DNA/TcMar	-1	219	1	1603
1962	11.7	10.6	0	scaffold00003	347606	347946	-3315952	+	R=7	DNA/DNA_unclass	1	377	0	1604
1320	0	0.5	2.5	scaffold00003	355857	356056	-3307842	C	Contig1	simple_repeat	-19	338	143	1605
319	6.2	0	0	scaffold00003	356077	356157	-3307741	+	Contig1	simple_repeat	38	118	-239	1606
249	16.3	0	2.3	scaffold00003	475481	475524	-3188374	+	R=79	DNA/Mutatorlike	431	473	-403	1607
568	0.1	0	5.8	scaffold00003	479568	479811	-3184087	+	Contig1	simple_repeat	219	357	0	1608
1177	16.5	1	0	scaffold00003	519635	519834	-3144064	+	R=8	DNA/TcMar	14	215	-5	1609
1100	11	0	0	scaffold00003	520724	520878	-3143020	+	R=68	LTR/LTR_unclass	1	155	-1	1610
298	12	2	2	scaffold00003	521428	521478	-3142420	+	R=134	LTR/Copia	1	51	-4032	1611
2997	2.1	0.6	0	scaffold00003	521535	521867	-3142031	C	Contig20_fr_R=226_R=288	RC/Helitron	-3823	1437	1103	1612
810	7.3	5.5	3.1	scaffold00003	522502	522628	-3141270	C	Contig20_fr_R=226_R=288	RC/Helitron	-5130	130	1	1612
2060	2.1	1.3	0	scaffold00003	522642	522877	-3141021	+	R=17_R=154	LTR/LTR_unclass	1	239	-501	1613
1151	5	0	0	scaffold00003	522912	523050	-3140848	+	R=20	TE/TE_unclass	1	139	0	1614
324	26.1	4.3	4.9	scaffold00003	522915	523099	-3140799	C	Contig19	DNA/TcMar	0	332	149	1615		*
3830	0.5	0	0	scaffold00003	524829	525241	-3138657	+	R=95	LTR/LTR_unclass	1	413	0	1616
715	13.4	3.1	2.3	scaffold00003	525898	526027	-3137871	C	R=207	DNA/DNA_unclass	-189	131	1	1617
1521	9.9	0	0	scaffold00003	526268	526469	-3137429	+	R=17_R=154	LTR/LTR_unclass	539	740	0	1618
2231	18.3	8.2	0	scaffold00003	527355	527780	-3136118	+	R=79	DNA/Mutatorlike	1	461	-415	1619
488	22.9	7.6	0.7	scaffold00003	527877	528008	-3135890	+	R=79	DNA/Mutatorlike	734	874	-2	1620
229	4.7	0	1.2	scaffold00003	547942	548028	-3115870	C	Contig1	simple_repeat	-241	116	31	1621
1404	0	0	0	scaffold00003	552521	552670	-3111228	+	R=25	DNA/TcMar	15	164	0	1622
227	11.3	1.4	0	scaffold00003	559691	559761	-3104137	+	Contig1	simple_repeat	45	116	-241	1623
1209	1.9	1.9	1.4	scaffold00003	590187	590396	-3073502	C	Contig1	simple_repeat	0	357	147	1624
517	26.7	3	3	scaffold00003	595668	595899	-3067999	+	Contig17	RC/Helitron	2	233	-249	1625
411	13.5	6.8	3.3	scaffold00003	608910	609055	-3054843	+	Contig1	simple_repeat	69	219	-138	1626
3139	26.9	0.7	0.8	scaffold00003	617556	618451	-3045447	C	R=2	TE/TE_unclass	-20	913	19	1627
3043	28.3	0.6	0.7	scaffold00003	632569	633476	-3030422	+	R=2	TE/TE_unclass	19	925	-8	1628
234	17.5	0	0	scaffold00003	642355	642394	-3021504	C	R=44	TE/TE_unclass	-14	233	194	1629
1512	0.5	0	0	scaffold00003	647426	647622	-3016276	C	Contig1	simple_repeat	-156	201	5	1630
256	14.1	4.8	7.3	scaffold00003	663351	663434	-3000464	C	Contig20_fr_R=226_R=288	RC/Helitron	-5137	123	42	1631
951	1.6	2.5	0	scaffold00003	693379	693499	-2970399	C	R=55	TE/TE_unclass	0	124	1	1632
898	22.1	6.3	1.7	scaffold00003	693585	693805	-2970093	C	R=79	DNA/Mutatorlike	-407	469	239	1633
1514	7.9	1.9	0	scaffold00003	693989	694202	-2969696	C	R=146	TE/TE_unclass	0	218	1	1634
229	15.7	3.9	0	scaffold00003	704835	704885	-2959013	+	R=236_fl_R=279_R-234_R=130	DNA/TcMar	1162	1214	-272	1635
12349	0	0	0	scaffold00003	721518	722915	-2940983	C	Contig21	DNA/TcMar-Tc1	0	1398	1	1636
664	9.6	6.4	2.8	scaffold00003	726400	726570	-2937328	+	Contig1	simple_repeat	45	221	-136	1637
237	10.6	0	5.3	scaffold00003	795739	795778	-2868120	+	Contig10_fl_Contig13	DNA/TcMar-Mariner	1	38	-1250	1638
361	15.7	0.8	0	scaffold00003	806954	807074	-2856824	+	Contig1	simple_repeat	216	337	-20	1639
1100	7.2	0	0	scaffold00003	810805	810942	-2852956	+	R=38	DNA/DNA_unclass	1	138	0	1640
247	14.5	0	0	scaffold00003	815319	815394	-2848504	C	Contig1	simple_repeat	-241	116	41	1641
235	19.4	1.1	0	scaffold00003	816479	816571	-2847327	C	Contig1	simple_repeat	-238	119	26	1642
2715	3.9	2.4	0.8	scaffold00003	850257	850614	-2813284	C	Contig31	DNA/hAT	0	428	1	1643
1303	5.7	0.6	0	scaffold00003	875146	875304	-2788594	+	R=58	RC/Helitron	1	160	-34	1644
654	16.8	0.8	0	scaffold00003	875342	875460	-2788438	+	Contig17	RC/Helitron	362	481	-1	1645
1670	3.6	0.5	0	scaffold00003	877865	878057	-2785841	C	R=58	RC/Helitron	0	194	1	1646
2712	27.2	1.7	1.7	scaffold00003	894968	895770	-2768128	+	R=2	TE/TE_unclass	2	804	-129	1647
2664	29.5	2	1.3	scaffold00003	900163	901055	-2762843	C	R=2	TE/TE_unclass	-33	900	2	1648
673	15.6	2.1	11.1	scaffold00003	945871	946057	-2717841	C	R=11	DNA/hAT	-4054	664	493	1649
888	10.2	0.7	4.3	scaffold00003	961993	962135	-2701763	+	R=38	DNA/DNA_unclass	1	138	0	1650
268	5.3	5.3	0	scaffold00003	1105846	1105883	-2558015	+	Contig15_fr	DNA/TcMar-Tc1	462	501	0	1651
686	8.9	0	0	scaffold00003	1142399	1142488	-2521410	+	R=53	TE/TE_unclass	1	90	0	1652
231	22.3	0	14.9	scaffold00003	1187654	1187753	-2476145	+	R=11	DNA/hAT	372	458	-4260	1653
232	17.1	0	0	scaffold00003	1264199	1264233	-2399665	+	Contig31	DNA/hAT	1	35	-393	1654
253	16.7	0	0	scaffold00003	1264262	1264303	-2399595	C	Contig31	DNA/hAT	-386	42	1	1654
559	14.5	10.5	3.3	scaffold00003	1264336	1264449	-2399449	+	R=10	DNA/hAT	401	522	0	1655
301	5.1	35.6	0	scaffold00003	1264853	1264911	-2398987	C	R=183	TE/TE_unclass	0	83	4	1656
12412	0.4	0	0.1	scaffold00003	1448288	1449620	-2214278	+	R=52	DNA/TcMar-Tc1	1	1332	0	1657
728	20.7	10.3	2.7	scaffold00003	1453806	1454009	-2209889	C	R=8	DNA/TcMar	0	220	2	1658
258	16.7	7.4	0	scaffold00003	1459517	1459570	-2204328	C	R=14	DNA/TcMar	-17	236	179	1659
496	1.9	11.5	2.8	scaffold00003	1553648	1553812	-2110086	+	Contig1	simple_repeat	41	219	-138	1660
1368	9.4	5.2	3.8	scaffold00003	1563830	1564062	-2099836	+	R=78	LTR/LTR_unclass	1	236	0	1661
1650	3.2	0.5	0	scaffold00003	1567254	1567443	-2096455	+	R=58	RC/Helitron	4	194	0	1662
2319	7.9	6.4	0	scaffold00003	1567449	1567786	-2096112	+	Contig17	RC/Helitron	2	361	-121	1663
3333	2.6	0	0	scaffold00003	1567787	1568163	-2095735	+	R=7	DNA/DNA_unclass	1	377	0	1664
969	2.5	0	0	scaffold00003	1568164	1568279	-2095619	+	Contig17	RC/Helitron	367	482	0	1663
875	1.1	6.7	1.5	scaffold00003	1579090	1579283	-2084615	C	Contig1	simple_repeat	-153	204	1	1665
393	11.1	19.4	2.8	scaffold00003	1594165	1594257	-2069641	+	R=8	DNA/TcMar	113	220	0	1666
755	30.1	1.9	3.8	scaffold00003	1609168	1609488	-2054410	+	R=2	TE/TE_unclass	449	763	-170	1667
231	4.3	0	1.4	scaffold00003	1614469	1614539	-2049359	C	Contig1	simple_repeat	-242	115	46	1668
473	3.5	6	2.5	scaffold00003	1614625	1614741	-2049157	C	Contig1	simple_repeat	-199	158	38	1669
1533	0	0	0	scaffold00003	1618816	1618979	-2044919	C	R=25	DNA/TcMar	0	164	1	1670
894	4.3	3.8	2.5	scaffold00003	1642640	1642878	-2021020	+	Contig1	simple_repeat	115	356	-1	1671
2073	0.7	1.4	0	scaffold00003	1674326	1674601	-1989297	+	R=102	TE/TE_unclass	1	280	0	1672
14020	0	0	0	scaffold00003	1675004	1676489	-1987409	C	R=236_fl_R=279_R-234_R=130	DNA/TcMar	0	1486	1	1673
645	10.5	0	4.2	scaffold00003	1687331	1687429	-1976469	C	R=74	TE/TE_unclass	0	95	1	1674
411	3.7	0	9.3	scaffold00003	1687433	1687491	-1976407	C	Contig15_fr	DNA/TcMar-Tc1	0	501	448	1675
669	9.4	1	0	scaffold00003	1802040	1802135	-1861763	+	R=30	DNA/TcMar	1	97	0	1676
531	15.1	3.5	2.6	scaffold00003	1802136	1802153	-1861745	+	R=38	DNA/DNA_unclass	4	118	-20	1677
318	7.5	0	0	scaffold00003	1816173	1816239	-1847659	+	Contig1	simple_repeat	59	125	-232	1678
227	8.8	1.7	1.7	scaffold00003	1818780	1818837	-1845061	C	Contig1	simple_repeat	-233	124	67	1679
1041	0	4.4	0	scaffold00003	1819157	1819315	-1844583	C	Contig1	simple_repeat	-165	192	27	1680
1397	14.5	0	0.9	scaffold00003	1821259	1821480	-1842418	C	R=8	DNA/TcMar	0	220	1	1681
312	34.4	0	0.8	scaffold00003	1831584	1831709	-1832189	+	R=2	TE/TE_unclass	23	147	-786	1682
2333	24.2	0.4	0.2	scaffold00003	1831719	1832224	-1831674	+	R=2	TE/TE_unclass	426	932	-1	1683
1372	9.2	6.8	0	scaffold00003	1862456	1862661	-1801237	+	R=8	DNA/TcMar	1	220	0	1684
6663	0.4	0	0	scaffold00003	1862705	1863418	-1800480	C	R=69	TE/TE_unclass	0	714	1	1685
1041	1.9	2.5	1.8	scaffold00003	1867581	1867742	-1796156	C	Contig1	simple_repeat	-162	195	33	1686
263	21.8	0	1.4	scaffold00003	1896599	1896668	-1767230	C	R=39	DNA/DNA_unclass	0	418	350	1687
12437	0.4	0	0	scaffold00003	1900419	1901750	-1762148	C	R=52	DNA/TcMar-Tc1	0	1332	1	1688
1084	1.4	9.9	0	scaffold00003	1909331	1909561	-1754337	C	Contig1	simple_repeat	-130	227	1	1689
473	27.4	10.5	7.5	scaffold00003	1917508	1917831	-1746067	C	R=109_contig5	DNA/hAT	-23	333	1	1690
708	17.1	0	2.2	scaffold00003	1978848	1978985	-1684913	+	R=45	DNA/DNA_unclass	3	137	-73	1691
484	10.3	6.1	3.7	scaffold00003	1979650	1979780	-1684118	+	Contig1	simple_repeat	66	199	-158	1692
955	5.8	0.8	0	scaffold00003	1982294	1982413	-1681485	+	R=38	DNA/DNA_unclass	2	122	-16	1693
266	10.5	0	0	scaffold00003	1987425	1987462	-1676436	C	Contig10_fl_Contig13	DNA/TcMar-Mariner	0	1288	1251	1694
311	1.9	0	0	scaffold00003	2024392	2024491	-1639407	C	Contig1	simple_repeat	-240	117	17	1695
608	2.3	1.9	31.5	scaffold00003	2033231	2033457	-1630441	+	Contig1	simple_repeat	64	220	-137	1696
468	15.6	8.4	3.2	scaffold00003	2076017	2076135	-1587763	C	R=14	DNA/TcMar	0	253	129	1697
508	24.2	1.6	0	scaffold00003	2076266	2076389	-1587509	+	R=39	DNA/DNA_unclass	293	418	0	1698
758	18	21.3	2.1	scaffold00003	2085550	2085793	-1578105	+	Contig9_R=103	LTR/LTR_unclass	1	290	-49	1699
1213	13.9	0	3.1	scaffold00003	2091139	2091339	-1572559	C	R=8	DNA/TcMar	-25	195	1	1700
2230	9.3	4.7	2.6	scaffold00003	2112450	2112792	-1551106	+	R=200	DNA/DNA_unclass	1	350	0	1701
69322	0	0	0	scaffold00003	2173074	2181732	-1482166	+	R=21	LTR/Gypsy	3	8659	0	1702
233	7	0	0	scaffold00003	2218450	2218506	-1445392	C	Contig1	simple_repeat	-300	57	1	1703
586	25.3	10.3	0.5	scaffold00003	2234111	2234285	-1429613	+	R=2	TE/TE_unclass	287	478	-455	1704
3731	26.4	0.5	0.5	scaffold00003	2234816	2235701	-1428197	+	R=2	TE/TE_unclass	20	905	-28	1705
1059	29.5	4.2	0.3	scaffold00003	2235826	2236158	-1427740	+	R=2	TE/TE_unclass	588	933	0	1704
625	20.6	5.3	0	scaffold00003	2249510	2249640	-1414258	+	R=38	DNA/DNA_unclass	1	138	0	1706
1123	1.7	2.8	1.7	scaffold00003	2268132	2268307	-1395591	C	Contig1	simple_repeat	-49	308	131	1707
3758	26	0.6	0.6	scaffold00003	2298538	2299420	-1364478	+	R=2	TE/TE_unclass	23	905	-28	1708
535	28.1	2.3	0	scaffold00003	2321044	2321171	-1342727	C	R=11	DNA/hAT	-4057	661	531	1709
387	23.5	0	0	scaffold00003	2390961	2391045	-1272853	+	R=13	LTR/LTR_unclass	1	85	-4	1710
254	3.1	0	0	scaffold00003	2408981	2409045	-1254853	C	Contig1	simple_repeat	-242	115	51	1711
276	5.8	0	0	scaffold00003	2409525	2409593	-1254305	C	Contig1	simple_repeat	-241	116	48	1712
602	9.9	0	8	scaffold00003	2445709	2445883	-1218015	C	Contig1	simple_repeat	-37	320	159	1713
595	24.8	1.5	7.6	scaffold00003	2476190	2476385	-1187513	C	Contig2	LTR/LTR_unclass	-11	185	1	1714
347	14.7	0.9	0	scaffold00003	2481696	2481811	-1182087	+	Contig1	simple_repeat	220	336	-21	1715
560	7.2	7.7	2.7	scaffold00003	2501410	2501552	-1162346	C	Contig1	simple_repeat	-136	221	72	1716
1455	0	0	0	scaffold00003	2505182	2505335	-1158563	C	R=265	LTR/LTR_unclass	0	154	1	1717
294	31.4	4	4	scaffold00003	2508275	2508642	-1155256	C	Contig26_fr_R=289_R=204	LTR/Copia	-2067	2143	1971	1718
5847	7.4	1.4	1.3	scaffold00003	2513085	2514504	-1149394	+	R=296	LTR/Copia	1	633	0	1719
1207	0	0	0	scaffold00003	2514505	2514635	-1149263	+	R=257	LTR/Copia	1	131	0	1720
1455	0	0	0	scaffold00003	2520211	2520364	-1143534	C	R=265	LTR/LTR_unclass	0	154	1	1721
7727	0	0	0	scaffold00003	2538634	2539451	-1124447	+	R=314_contig27_R=228_R=177_R=37	DNA/hAT	1	818	0	1722
1569	2.1	0	0	scaffold00003	2549477	2549664	-1114234	C	Contig1	simple_repeat	-136	221	34	1723
615	27	2.2	2.2	scaffold00003	2552277	2552458	-1111440	C	R=2	TE/TE_unclass	-199	734	553	1724		*
915	28.3	1.5	2.7	scaffold00003	2552401	2552738	-1111160	+	R=2	TE/TE_unclass	427	760	-173	1725
901	11.6	12.9	0	scaffold00003	2581144	2581298	-1082600	+	R=8	DNA/TcMar	3	177	-43	1726
377	16.4	0	1.5	scaffold00003	2590945	2591012	-1072886	C	R=44	TE/TE_unclass	-180	67	1	1727
644	21.9	0.7	0	scaffold00003	2613074	2613210	-1050688	C	Contig15_fr	DNA/TcMar-Tc1	-13	488	351	1728
413	11.1	15.3	0	scaffold00003	2671641	2671712	-992186	+	R=74	TE/TE_unclass	3	85	-10	1729
1599	16.3	10.1	1.9	scaffold00003	2673209	2673546	-990352	C	R=10	DNA/hAT	-1	521	157	1730
319	7.1	0	0	scaffold00003	2673603	2673644	-990254	C	Contig31	DNA/hAT	-386	42	1	1731
409	16	5.3	0	scaffold00003	2673645	2673719	-990179	C	R=10	DNA/hAT	-439	83	5	1730
488	9.4	6.7	1.3	scaffold00003	2673720	2673792	-990106	C	R=314_contig27_R=228_R=177_R=37	DNA/hAT	0	818	742	1732
2560	11.6	0.6	0	scaffold00003	2673793	2674153	-989745	C	R=29	DNA/DNA_unclass	-1	363	1	1733
332	23.1	3.3	2.5	scaffold00003	2674154	2674223	-989675	C	R=314_contig27_R=228_R=177_R=37	DNA/hAT	-72	746	676	1732
423	13.2	6.5	1.9	scaffold00003	2700858	2701057	-962841	C	Contig1	simple_repeat	-147	210	2	1734
962	0.6	7.2	0.5	scaffold00003	2702640	2702819	-961079	+	Contig1	simple_repeat	21	212	-145	1735
682	0	0	0	scaffold00003	2703044	2703115	-960783	C	Contig1	simple_repeat	-171	186	115	1736
226	1.4	0	1.4	scaffold00003	2703130	2703202	-960696	+	Contig1	simple_repeat	1	72	-285	1737
309	9.5	3.5	1.1	scaffold00003	2719073	2719157	-944741	+	Contig1	simple_repeat	189	275	-82	1738
1856	1.5	0	0	scaffold00003	2726500	2726705	-937193	+	R=197	LTR/LTR_unclass	1	206	0	1739
1856	1.5	0	0	scaffold00003	2733022	2733227	-930671	+	R=197	LTR/LTR_unclass	1	206	0	1740
1357	2.6	6.8	0	scaffold00003	2734680	2734871	-929027	+	Contig33_R=163	TE/TE_unclass	1	205	-47	1741
1207	0	0	0	scaffold00003	2737849	2737979	-925919	C	R=257	LTR/Copia	0	131	1	1742		*
5847	8.7	1.7	1	scaffold00003	2737979	2739399	-924499	C	R=296	LTR/Copia	0	633	1	1743
1028	35.3	0	0	scaffold00003	2742871	2743250	-920648	C	Contig28	LTR/Copia	-2324	1896	1517	1744
1292	0.7	0.7	0	scaffold00003	2746192	2746333	-917565	+	R=17_R=154	LTR/LTR_unclass	1	143	-597	1745
5354	2	0.2	1.7	scaffold00003	2746542	2747154	-916744	+	R=17_R=154	LTR/LTR_unclass	137	740	0	1745
463	0	0	0	scaffold00003	2749818	2749870	-914028	+	Contig33_R=163	TE/TE_unclass	200	252	0	1746
1808	34.7	3.8	3.1	scaffold00003	2751821	2753739	-910159	C	R=21	LTR/Gypsy	-3641	5018	3087	1747
1656	6.9	0.9	0.5	scaffold00003	2780540	2780758	-883140	+	R=8	DNA/TcMar	1	220	0	1748
1695	6.4	0.5	0.5	scaffold00003	2783469	2783688	-880210	+	R=8	DNA/TcMar	1	220	0	1749
623	20.2	0	0.9	scaffold00003	2783730	2783844	-880054	+	R=44	TE/TE_unclass	1	114	-133	1750
460	12.9	0.6	3.2	scaffold00003	2830661	2830820	-833078	C	Contig1	simple_repeat	-51	306	151	1751
307	25.1	0	26.3	scaffold00003	2834151	2834200	-829698	C	R=38	DNA/DNA_unclass	-1	137	29	1752
496	12.6	0	21.7	scaffold00003	2834201	2834312	-829586	C	R=30	DNA/TcMar	0	97	6	1753
307	25.1	0	26.3	scaffold00003	2834313	2834323	-829575	C	R=38	DNA/DNA_unclass	-1	28	1	1752
924	2.4	4.7	1.1	scaffold00003	2848757	2848925	-814973	C	Contig1	simple_repeat	-153	204	30	1754
1397	0	0	0	scaffold00003	2853923	2854078	-809820	C	R=68	LTR/LTR_unclass	0	156	1	1755
264	19.8	5.8	7.6	scaffold00003	2853973	2854092	-809806	C	R=212	LTR/Copia	-53	4400	4283	1756		*
3556	32.4	2.4	2.7	scaffold00003	2854204	2856240	-807658	C	R=212	LTR/Copia	-231	4222	2192	1756
3193	30.8	5.2	4.2	scaffold00003	2856497	2858268	-805630	C	R=212	LTR/Copia	-2506	1947	158	1756
1397	0	0	0	scaffold00003	2858269	2858424	-805474	C	R=68	LTR/LTR_unclass	0	156	1	1757
250	10	2.5	0	scaffold00003	2876395	2876434	-787464	C	R=8	DNA/TcMar	-24	196	156	1758
322	12.2	0	0	scaffold00003	2909924	2909972	-753926	+	Contig15_fr	DNA/TcMar-Tc1	453	501	0	1759
407	26.9	5.7	6.7	scaffold00003	2967477	2967791	-696107	C	R=2	TE/TE_unclass	-199	734	423	1760
557	0.2	0	1.5	scaffold00003	3011727	3011931	-651967	+	Contig1	simple_repeat	219	357	0	1761
227	12.5	0	0	scaffold00003	3083074	3083121	-580777	C	R=132_R=153	LTR/LTR_unclass	-64	411	364	1762
562	31.7	6.7	2.3	scaffold00003	3135691	3136106	-527792	+	R=69	TE/TE_unclass	141	574	-140	1763
779	5.4	5.4	1.3	scaffold00003	3136473	3136621	-527277	C	Contig1	simple_repeat	-68	289	135	1764
356	4.7	0	0	scaffold00003	3152017	3152059	-511839	C	Contig15_fr	DNA/TcMar-Tc1	0	501	459	1765
859	3.3	3.1	5.1	scaffold00003	3157495	3157653	-506245	+	Contig1	simple_repeat	42	197	-160	1766
596	11.4	0	5.2	scaffold00003	3169028	3169129	-494769	+	R=39	DNA/DNA_unclass	1	97	-321	1767
300	15.7	0	0	scaffold00003	3169113	3169163	-494735	+	R=39	DNA/DNA_unclass	368	418	0	1768		*
408	30.3	1.5	0.8	scaffold00003	3170481	3170613	-493285	C	R=2	TE/TE_unclass	-616	317	184	1769
341	22	9.9	1.7	scaffold00003	3174791	3174901	-488997	+	R=8	DNA/TcMar	101	220	0	1770
234	14	8	0	scaffold00003	3196127	3196176	-467722	C	R=165	TE/TE_unclass	-103	148	95	1771
803	17.1	2.8	4.6	scaffold00003	3209491	3209668	-454230	C	Contig15_fr	DNA/TcMar-Tc1	0	501	327	1772
1605	1	2.4	0	scaffold00003	3209737	3209945	-453953	C	R=102	TE/TE_unclass	-66	214	1	1773
229	32	4.4	1.9	scaffold00003	3215220	3215423	-448475	C	R=11	DNA/hAT	-4057	661	453	1774
1500	2.8	0	3.3	scaffold00003	3251823	3252044	-411854	+	Contig1	simple_repeat	7	221	-136	1775
1022	0.2	0.5	1.6	scaffold00003	3251957	3252197	-411701	C	Contig1	simple_repeat	-136	221	114	1776		*
383	2	3.5	24.6	scaffold00003	3252139	3252300	-411598	+	Contig1	simple_repeat	113	221	-136	1776		*
295	6.5	0	4.3	scaffold00003	3252306	3252401	-411497	+	Contig1	simple_repeat	28	119	-238	1777
258	6.1	0	0	scaffold00003	3293039	3293071	-370827	C	Contig16	LTR/LTR_unclass	0	199	167	1778
565	10	3.3	0	scaffold00003	3293208	3293297	-370601	C	Contig15_fr	DNA/TcMar-Tc1	0	501	409	1779
545	10.6	10.6	0	scaffold00003	3293298	3293391	-370507	+	R=14	DNA/TcMar	150	253	0	1780
488	14.7	0	0	scaffold00003	3302485	3302559	-361339	C	R=183	TE/TE_unclass	-7	76	2	1781
388	24.3	5	8.1	scaffold00003	3403440	3403618	-260280	+	Contig17	RC/Helitron	1	174	-308	1782
535	1.3	5.3	0	scaffold00003	3439253	3439328	-224570	C	Contig1	simple_repeat	-163	194	115	1783
502	30.4	3.4	3.4	scaffold00003	3442831	3443126	-220772	C	R=104	LTR/LTR_unclass	0	296	1	1784
884	28.9	0.6	1.8	scaffold00003	3462726	3463060	-200838	C	R=2	TE/TE_unclass	-171	762	432	1785
311	38	2.1	3	scaffold00003	3462888	3463218	-200680	+	R=2	TE/TE_unclass	435	762	-171	1785		*
469	1.5	0	2.1	scaffold00003	3479782	3479933	-183965	C	Contig1	simple_repeat	0	357	219	1786
888	28.7	0.6	1.8	scaffold00003	3482559	3482892	-181006	C	R=2	TE/TE_unclass	-172	761	432	1787
688	31.5	2.4	3.3	scaffold00003	3482720	3483051	-180847	+	R=2	TE/TE_unclass	435	763	-170	1787		*
634	13.2	3.2	6.1	scaffold00003	3491584	3491769	-172129	+	Contig1	simple_repeat	135	315	-42	1788
1928	13.9	5.6	1.4	scaffold00003	3503002	3503343	-160555	+	R=109_contig5	DNA/hAT	1	356	0	1789
1018	15.3	0	2.7	scaffold00003	3503397	3503584	-160314	+	Contig2	LTR/LTR_unclass	1	183	-13	1790
372	0	0	2.3	scaffold00003	3539817	3539959	-123939	C	Contig1	simple_repeat	0	357	219	1791
258	21.1	0	0	scaffold00003	3550880	3550931	-112967	C	R=44	TE/TE_unclass	-1	246	195	1792
930	18.8	1.1	0	scaffold00003	3559016	3559196	-104702	+	Contig2	LTR/LTR_unclass	1	183	-13	1793
4623	0.8	2.1	0	scaffold00003	3583208	3583718	-80180	+	R=10	DNA/hAT	1	522	0	1794
386	6.5	4.3	0	scaffold00003	3625851	3625943	-37955	C	Contig1	simple_repeat	-134	223	127	1795
355	0	0	0	scaffold00004	1	93	-3565163	C	Contig1	simple_repeat	-264	93	1	1796
746	17	2.2	0	scaffold00004	12778	12912	-3552344	C	R=38	DNA/DNA_unclass	0	138	1	1797
313	7.2	9	6.6	scaffold00004	14335	14467	-3550789	C	Contig1	simple_repeat	-87	270	135	1798
490	16.3	2.3	0	scaffold00004	76607	76692	-3488564	+	R=53	TE/TE_unclass	1	88	-2	1799
1008	1.1	5	1.1	scaffold00004	77140	77318	-3487938	+	Contig1	simple_repeat	35	220	-137	1800
413	8	0.1	0	scaffold00004	91108	91266	-3473990	+	Contig1	simple_repeat	221	357	0	1801
253	8.9	1.5	1.5	scaffold00004	107179	107246	-3458010	C	Contig1	simple_repeat	-233	124	57	1802
500	0	10.9	0	scaffold00004	108657	108720	-3456536	C	R=14	DNA/TcMar	0	253	183	1803		*
1049	2.9	4.3	0	scaffold00004	108716	108855	-3456401	+	Contig15_fr	DNA/TcMar-Tc1	356	501	0	1804
281	16.7	1.2	8.5	scaffold00004	143071	143234	-3422022	C	Contig1	simple_repeat	-38	319	167	1805
820	9.2	15.6	1.7	scaffold00004	143699	143852	-3421404	C	R=14	DNA/TcMar	0	253	79	1806
523	10.8	0	1.4	scaffold00004	144572	144646	-3420610	C	R=44	TE/TE_unclass	-173	74	1	1807
451	8.6	4.4	8.2	scaffold00004	157838	158065	-3407191	+	Contig1	simple_repeat	114	286	-71	1808
3016	27.3	0.8	0.6	scaffold00004	175481	176275	-3388981	+	R=2	TE/TE_unclass	96	891	-42	1809
3049	27.4	0.7	0.6	scaffold00004	181750	182569	-3382687	C	R=2	TE/TE_unclass	-45	888	68	1810
605	18.6	4.5	2.2	scaffold00004	182570	182701	-3382555	C	R=7	DNA/DNA_unclass	0	377	243	1811
541	16.1	0	0	scaffold00004	182724	182810	-3382446	C	R=7	DNA/DNA_unclass	-252	125	39	1811
771	16.8	0	0	scaffold00004	183441	183565	-3381691	+	R=7	DNA/DNA_unclass	1	125	-252	1812		*
1063	15.8	2.7	0	scaffold00004	183564	183747	-3381509	+	R=7	DNA/DNA_unclass	189	377	0	1813
3348	2.6	0	0	scaffold00004	192699	193075	-3372181	+	R=7	DNA/DNA_unclass	1	377	0	1814
365	0	0	10.2	scaffold00004	220625	220775	-3344481	+	Contig1	simple_repeat	221	357	0	1815		*
418	0	0	0	scaffold00004	220683	220781	-3344475	C	Contig1	simple_repeat	-241	116	18	1816
1109	9	0	0	scaffold00004	270349	270492	-3294764	+	R=155	DNA/DNA_unclass	2	145	-191	1817
1376	10.2	0.5	1	scaffold00004	271980	272186	-3293070	C	R=197	LTR/LTR_unclass	0	206	1	1818
371	10.8	0	6.2	scaffold00004	272203	272271	-3292985	+	R=197	LTR/LTR_unclass	1	65	-141	1819
352	16.6	13.8	2.8	scaffold00004	272409	272538	-3292718	+	R=197	LTR/LTR_unclass	45	188	-18	1819
1318	10.3	4.4	2.1	scaffold00004	273005	273233	-3292023	C	Contig17	RC/Helitron	-248	234	1	1820
547	32.7	1.5	1.5	scaffold00004	273273	273533	-3291723	C	R=256_R=291_R=305_R=277	LTR/Copia	-925	5301	5041	1821
3440	5.3	0.2	0	scaffold00004	274291	274702	-3290554	+	R=95	LTR/LTR_unclass	1	413	0	1822
1357	1.3	0	0	scaffold00004	274710	274858	-3290398	+	R=96	LTR/LTR_unclass	1	149	0	1823
318	10	0	2	scaffold00004	275421	275471	-3289785	+	R=101_R=84	DNA/DNA_unclass	1	50	-523	1824
385	11.9	4.5	0	scaffold00004	275804	275870	-3289386	+	R=40	TE/TE_unclass	2	71	0	1825
355	23.4	16.3	3.1	scaffold00004	275891	276031	-3289225	+	R=79	DNA/Mutatorlike	689	847	-29	1826
413	22.7	4.4	5.7	scaffold00004	306531	306689	-3258567	+	R=314_contig27_R=228_R=177_R=37	DNA/hAT	657	813	-5	1827
388	3.6	1.7	2.3	scaffold00004	316086	316201	-3249055	C	R=132_R=153	LTR/LTR_unclass	-15	460	363	1828
318	8.5	1	8.3	scaffold00004	337509	337611	-3227645	+	Contig1	simple_repeat	53	148	-209	1829
602	13.7	20.8	0	scaffold00004	382653	382849	-3182407	+	R=102	TE/TE_unclass	1	280	0	1830
466	8.6	1.4	1.4	scaffold00004	386775	386845	-3178411	C	R=40	TE/TE_unclass	0	71	1	1831
2714	6.9	3.6	0.3	scaffold00004	387007	387368	-3177888	C	Contig28	LTR/Copia	-3274	946	573	1832
1221	18.4	12	0	scaffold00004	388935	389184	-3176072	+	R=134	LTR/Copia	3549	3828	-255	1833
3919	0.5	0	0.5	scaffold00004	389590	390015	-3175241	C	R=46	DNA/TcMar	0	424	1	1834
4531	8.6	1.5	0	scaffold00004	390181	390775	-3174481	+	R=52	DNA/TcMar-Tc1	114	717	-615	1835
381	7	3.5	0	scaffold00004	391256	391312	-3173944	C	Contig28	LTR/Copia	-3282	938	880	1836
6559	2	0.5	0.1	scaffold00004	391904	392640	-3172616	+	R=17_R=154	LTR/LTR_unclass	1	740	0	1837
387	17.4	12.8	0	scaffold00004	392777	392862	-3172394	+	R=17_R=154	LTR/LTR_unclass	2	98	-642	1838
1735	14.1	1.2	5.9	scaffold00004	393543	394098	-3171158	C	R=101_R=84	DNA/DNA_unclass	0	573	1	1839
21813	0	0	0	scaffold00004	394434	396747	-3168509	+	Contig22_R=324_R=244	DNA/TcMar-Tc4	1	2314	0	1840
242	6.9	0	0	scaffold00004	396825	396853	-3168403	+	R=52	DNA/TcMar-Tc1	1301	1329	-3	1841
1397	0	0	0	scaffold00004	417072	417227	-3148029	C	R=68	LTR/LTR_unclass	0	156	1	1842
264	19.8	5.8	7.6	scaffold00004	417122	417241	-3148015	C	R=212	LTR/Copia	-53	4400	4283	1843		*
3556	32.4	2.4	2.7	scaffold00004	417353	419389	-3145867	C	R=212	LTR/Copia	-231	4222	2192	1843
3025	31.1	4.5	3.8	scaffold00004	419646	421227	-3144029	C	R=212	LTR/Copia	-2506	1947	354	1843
37332	0	0	0.6	scaffold00004	426762	431005	-3134251	C	Contig28	LTR/Copia	0	4220	1	1844
250	28.3	8.1	6.2	scaffold00004	431006	431201	-3134055	C	R=212	LTR/Copia	-4094	359	158	1843
1397	0	0	0	scaffold00004	431202	431357	-3133899	C	R=68	LTR/LTR_unclass	0	156	1	1845
256	0	0	0	scaffold00004	461458	461524	-3103732	+	Contig1	simple_repeat	1	67	-290	1846
1036	1.8	1.7	4.2	scaffold00004	466372	466543	-3098713	+	Contig1	simple_repeat	43	210	-147	1847
247	1.5	0	2.8	scaffold00004	466798	466891	-3098365	+	Contig1	simple_repeat	2	87	-270	1848
847	2.1	9.1	0	scaffold00004	470048	470233	-3095023	+	Contig1	simple_repeat	17	219	-138	1849
1113	17	3.8	0	scaffold00004	489267	489478	-3075778	C	R=8	DNA/TcMar	0	220	1	1850
357	14.1	12.1	5.7	scaffold00004	522534	522616	-3042640	+	R=13	LTR/LTR_unclass	1	88	-1	1851
1043	0	0	0.5	scaffold00004	526006	526190	-3039066	+	Contig1	simple_repeat	167	350	-7	1852
997	2.6	3	3	scaffold00004	527633	527829	-3037427	C	Contig1	simple_repeat	-21	336	140	1853
2144	0.4	2.2	0	scaffold00004	542632	542905	-3022351	+	R=102	TE/TE_unclass	1	280	0	1854
1722	4.2	0	0.9	scaffold00004	542894	543107	-3022149	C	R=78	LTR/LTR_unclass	-24	212	1	1855		*
554	7	0	0	scaffold00004	543528	543598	-3021658	C	R=40	TE/TE_unclass	0	71	1	1856
1143	16.9	13.5	2	scaffold00004	544141	544406	-3020850	C	R=104	LTR/LTR_unclass	0	296	1	1857
487	10.5	5.6	3.3	scaffold00004	544659	544747	-3020509	C	Contig31	DNA/hAT	0	428	338	1858
39389	0	0	0.1	scaffold00004	544951	549176	-3016080	+	Contig28	LTR/Copia	1	4220	0	1859
2496	3.9	0.7	0.3	scaffold00004	554204	554509	-3010747	+	Contig28	LTR/Copia	661	967	-3253	1860
3918	0.2	0	0	scaffold00004	555142	555559	-3009697	C	R=39	DNA/DNA_unclass	0	418	1	1861
706	19.6	0.8	0	scaffold00004	555835	555967	-3009289	C	R=104	LTR/LTR_unclass	0	296	163	1862
497	11.1	0.8	33.5	scaffold00004	594750	594994	-2970262	+	Contig1	simple_repeat	37	221	-136	1863
265	4.6	0	0	scaffold00004	595006	595070	-2970186	+	Contig1	simple_repeat	51	115	-242	1864
490	21.9	0	0	scaffold00004	607209	607304	-2957952	C	R=193	TE/TE_unclass	0	102	7	1865
382	11.6	3.6	7.4	scaffold00004	608293	608432	-2956824	C	Contig1	simple_repeat	-165	192	58	1866
1013	3.5	4	1.7	scaffold00004	615916	616089	-2949167	+	Contig1	simple_repeat	129	306	-51	1867
1392	0.6	0	0	scaffold00004	647093	647249	-2918007	C	R=121	LTR/LTR_unclass	0	157	1	1868
2529	34.3	2.7	2.3	scaffold00004	647329	648801	-2916455	+	R=212	LTR/Copia	245	1723	-2730	1869
3114	33.4	2.6	3.5	scaffold00004	649258	651384	-2913872	+	R=212	LTR/Copia	2190	4298	-155	1869
1392	0.6	0	0	scaffold00004	651385	651541	-2913715	C	R=121	LTR/LTR_unclass	0	157	1	1870
337	0	0	0	scaffold00004	667217	667309	-2897947	+	Contig1	simple_repeat	2	94	-263	1871
351	1.2	1.1	8.1	scaffold00004	681838	681930	-2883326	C	Contig1	simple_repeat	-155	202	116	1872
3176	26.9	0.8	0.9	scaffold00004	683595	684484	-2880772	C	R=2	TE/TE_unclass	-26	907	19	1873
399	4.4	0	2.2	scaffold00004	685975	686113	-2879143	+	Contig1	simple_repeat	219	354	-3	1874
4333	3.6	0	0	scaffold00004	708141	708641	-2856615	+	Contig15_fr	DNA/TcMar-Tc1	1	501	0	1875
1186	12.1	6.5	3.6	scaffold00004	714231	714444	-2850812	+	R=8	DNA/TcMar	1	220	0	1876
473	23.3	5.3	3.5	scaffold00004	721939	722107	-2843149	+	Contig17	RC/Helitron	2	173	-309	1877
3619	22.4	1.4	4.1	scaffold00004	751655	752605	-2812651	+	R=191	LTR/Copia	1	926	-3674	1878
8517	0.1	0	2.6	scaffold00004	752606	753567	-2811689	C	Contig28	LTR/Copia	-3282	938	1	1879
5204	26.2	0.9	2.2	scaffold00004	753568	755010	-2810246	+	R=191	LTR/Copia	922	2346	-2254	1878
6717	28.5	1.1	1.4	scaffold00004	755374	757339	-2807917	+	R=191	LTR/Copia	2641	4599	-1	1878
4118	24	0.6	0.6	scaffold00004	783076	783988	-2781268	C	R=2	TE/TE_unclass	0	933	21	1880
4100	23.8	0.6	0.6	scaffold00004	800864	801771	-2763485	+	R=2	TE/TE_unclass	21	928	-5	1881
790	3.6	7.2	1	scaffold00004	818384	818577	-2746679	C	Contig1	simple_repeat	-17	340	135	1882
400	25.7	1	0	scaffold00004	831828	831928	-2733328	C	R=44	TE/TE_unclass	-111	136	35	1883
278	17.4	0	8.6	scaffold00004	874044	874106	-2691150	C	R=183	TE/TE_unclass	-24	59	2	1884
842	35.5	3.9	4.6	scaffold00004	926059	927168	-2638088	+	R=212	LTR/Copia	651	1752	-2701	1885
1066	0.5	3.2	1	scaffold00004	1006457	1006644	-2558612	+	Contig1	simple_repeat	144	335	-22	1886
225	12.5	0	0	scaffold00004	1048224	1048263	-2516993	C	R=44	TE/TE_unclass	0	247	208	1887
3923	0.2	0	0	scaffold00004	1054409	1054826	-2510430	C	R=39	DNA/DNA_unclass	0	418	1	1888
663	11.3	3.7	1.8	scaffold00004	1067401	1067562	-2497694	+	Contig1	simple_repeat	36	200	-157	1889
288	8.3	0	0	scaffold00004	1125397	1125432	-2439824	C	R=30	DNA/TcMar	-57	40	5	1890
262	11.4	0	0	scaffold00004	1161595	1161629	-2403627	C	R=30	DNA/TcMar	-57	40	6	1891
793	1.1	0	0	scaffold00004	1161699	1161789	-2403467	+	R=14	DNA/TcMar	163	253	0	1892
271	28.1	3.4	7.7	scaffold00004	1166063	1166239	-2399017	C	R=165	TE/TE_unclass	-65	186	17	1893
536	0.1	0	0	scaffold00004	1174345	1174612	-2390644	+	Contig1	simple_repeat	221	357	0	1894
1302	3.1	2.5	0.5	scaffold00004	1192520	1192716	-2372540	C	Contig1	simple_repeat	-150	207	7	1895
457	0	0	4.1	scaffold00004	1198777	1198954	-2366302	C	Contig1	simple_repeat	0	357	219	1896
1709	9.6	13	6	scaffold00004	1204908	1205238	-2360018	C	R=109_contig5	DNA/hAT	0	356	4	1897
243	22.8	0	0	scaffold00004	1225711	1225767	-2339489	C	R=25	DNA/TcMar	-5	159	103	1898
342	2.2	0.1	14	scaffold00004	1229426	1229628	-2335628	C	Contig1	simple_repeat	0	357	220	1899
680	6.7	0	0	scaffold00004	1230420	1230508	-2334748	C	R=13	LTR/LTR_unclass	0	89	1	1900
1167	16	0.5	0.9	scaffold00004	1235579	1235799	-2329457	C	R=8	DNA/TcMar	0	220	1	1901
264	6.1	0	0	scaffold00004	1238026	1238124	-2327132	C	Contig1	simple_repeat	-258	99	1	1902
1335	8.8	0	5.2	scaffold00004	1240148	1240351	-2324905	C	R=58	RC/Helitron	0	194	1	1903
287	10	0	0	scaffold00004	1240669	1240708	-2324548	C	Contig31	DNA/hAT	-388	40	1	1904
[truncated: 322 more rows]

## Sheet: Table_S3
Click on tabs at bottom to view each of Table S1-20.
Table S3. Candidate precise and imprecise intron excision events in single copy orthogroups
Orthogroup	A. lycopersici gene ID	# conserved intron positions with A. lycopersici-specific losses (all species)	No indels in alignment (candidate precise excision)	Indels in alignment (candidate imprecise excision)	# conserved intron positions (all species including A. lycopersici)	# conserved intron positions in D. pteronyssinus and T.urticae	# introns in A. lycopersici
OG0001162	aculy01g15980	3	3			4	0
OG0001173	aculy01g31860	1	1			5	1
OG0001244	aculy03g00270	2	2			14	4
OG0001367	aculy01g02290	1	1			4	0
OG0001417	aculy04g09900	2	2			6	5
OG0001491	aculy02g20030	1	1			7	0
OG0001582	aculy01g33910	1	1			1	0
OG0001584	aculy02g00250	1	1		1	10	8
OG0001749	aculy05g02110	1	1			1	1
OG0001819	aculy01g36770	1	1			1	2
OG0001860	aculy03g07410	1	1			1	0
OG0001872	aculy04g08980	1	1			2	0
OG0001961	aculy02g03180	1	1			1	0
OG0002000	aculy03g12020	1		1		3	1
OG0002099	aculy01g23290	1	1			5	0
OG0002118	aculy01g37540	1	1			2	0
OG0002126	aculy02g05200	1	1			4	0
OG0002138	aculy02g12660	1	1			5	1
OG0002161	aculy03g11700	1	1			4	6
OG0002231	aculy01g02660	1	1			8	0
OG0002243	aculy01g09660	2	2			2	0
OG0002275	aculy01g31520	1	1			4	0
OG0002312	aculy02g10370	3	3			4	0
OG0002444	aculy01g01360	1	1			6	0
OG0002483	aculy01g25420	1	1			3	0
OG0002506	aculy01g36220	1	1			2	0
OG0002570	aculy03g03750	1	1			4	0
OG0002574	aculy03g05990	3	3			11	0
OG0002589	aculy04g02720	1	1			2	0
OG0002605	aculy05g04340	1	1			7	1
OG0002719	aculy01g26640	1	1			2	0
OG0002783	aculy02g14570	1	1			2	0
OG0002785	aculy02g14990	1	1			1	0
OG0002831	aculy03g01320	3	3			4	0
OG0002838	aculy03g03430	1	1			1	0
OG0003026	aculy01g11910	1	1			2	0
OG0003031	aculy01g12470	1	1			3	0
OG0003145	aculy02g18860	1	1			1	0
OG0003152	aculy02g21170	1	1			5	0
OG0003227	aculy04g09580	1	1			6	0
OG0003358	aculy01g03870	1	1			4	0
OG0003428	aculy01g25180	1	1			1	0
OG0003440	aculy01g30870	1	1			1	1
OG0003465	aculy01g37480	2	2			2	0
OG0003495	aculy02g08970	1	1			2	0
OG0003538	aculy02g23660	1	1			1	0
OG0003624	aculy04g04700	1	1			1	0
OG0003639	aculy04g09520	1	1			1	0
OG0003770	aculy01g02170	1	1			2	0
OG0003775	aculy01g03640	2	2			3	0
OG0003779	aculy01g04470	2	1	1		3	0
OG0003849	aculy01g23730	1	1			2	0
OG0003866	aculy01g27480	2	2			3	0
OG0003896	aculy01g33540	1	1			3	0
OG0003910	aculy01g36040	1	1			3	0
OG0003915	aculy01g37320	1	1			1	0
OG0003965	aculy02g10850	1	1			1	0
OG0004025	aculy02g24370	1	1			1	0
OG0004065	aculy03g02140	1	1		1	4	6
OG0004069	aculy03g03480	1	1			1	0
OG0004310	aculy01g02870	1	1			3	0
OG0004415	aculy01g28080	1	1		1	4	1
OG0004440	aculy01g34130	1	1			4	0
OG0004455	aculy01g36990	2	2			6	0
OG0004561	aculy02g26910	1	1			2	0
OG0004659	aculy04g08770	1	1			3	0
OG0004668	aculy04g10660	1	1			6	0
OG0004701	aculy17g00020	1	1			6	0
OG0004833	aculy01g05410	2	2			2	0
OG0004851	aculy01g09520	1	1			3	0
OG0004867	aculy01g14360	1	1			1	0
OG0004934	aculy01g32780	1	1			4	0
OG0005013	aculy02g15870	1	1			4	0
OG0005014	aculy02g16110	1	1			3	0
OG0005074	aculy03g01630	2	2			3	0
OG0005093	aculy03g11300	1	1			1	0
OG0005110	aculy04g04470	1	1			3	0
OG0005135	aculy04g10480	2	1	1		4	0
OG0005538	aculy04g01440	2	2			2	0
OG0005860	aculy04g06070	1	1			2	0
SUM		100	97	3	3	266	38

## Sheet: Table_S4
Click on tabs at bottom to view each of Table S1-20.
Table S4. Summary of the CAFE analysis
Branch of Tree used in CAFE*	Expansions	Genes Gained	Equal	Contractions	Genes Lost	Families Lost	Average Expansion	Sig Expansions	Sig Contractions	Total Sig Changes
<11>	358	761	6099	39	42	35	0.0824184	84	2	86
Cele<30>**	560	1586	3696	2240	2975	1558	-0.212154	62	79	141
<33>	1818	3076	4144	534	751	378	0.325035	96	62	158
Dpul<26>	938	2533	4636	922	1132	572	0.186331	102	35	137
Cscu<12>	2513	6965	3524	459	572	239	0.709139	143	17	160
Isca<8>	837	2383	4890	769	1080	399	0.194217	115	34	149
<25>	59	112	6270	167	211	19	-0.0136075	15	11	26
<21>	95	188	6284	117	119	55	0.00711304	35	2	37
<27>	35	60	6238	223	239	5	-0.027679	5	9	14
Dpte<2>	523	883	5159	814	922	434	-0.0228854	19	22	41
<23>	64	86	6148	284	323	93	-0.0346374	13	24	37
Lpol<14>	2503	6122	3614	379	680	180	0.816453	160	33	193
Turt<4>	1038	2252	4621	837	953	579	0.204422	78	24	102
Ptep<10>	1411	6946	4422	663	795	257	0.366321	118	20	138
Bmor<20>	790	1321	4857	849	980	572	0.0358744	62	28	90
Drer<32>	1944	5583	4395	157	198	70	0.572599	122	10	132
Mocc<6>	577	2813	4697	1222	1701	694	-0.0896861	49	104	153
Dmel<18>	562	1038	5540	394	488	202	0.0839647	43	20	63
<13>	837	1193	5637	22	24	9	0.158497	144	2	146
Tcas<22>	532	1402	5466	498	585	235	0.0575228	53	12	65
<17>	126	225	6083	287	309	129	-0.0151539	29	10	39
<15>	46	118	6332	118	166	0	-0.0098964	18	15	33
<19>	72	124	6285	139	149	63	-0.00633988	24	6	30
<9>	367	714	6122	7	8	3	0.078398	110	2	112
Alyc<0>	206	268	4565	1725	2192	1131	-0.284676	4	101	105
Hsap<34>	754	1601	5424	318	525	93	0.102366	14	25	39
<3>	47	68	5195	1254	1574	704	-0.213855	6	102	108
Agam<16>	454	903	5669	373	441	159	0.0581413	55	16	71
<1>	6	6	6061	429	474	262	-0.0689655	1	20	21
<7>	158	382	5771	567	648	237	-0.0519561	32	24	56
<5>	89	158	6361	46	73	2	0.00896861	34	7	41
<29>	22	69	6305	169	210	5	-0.0222669	2	10	12
Smar<28>	784	1968	4445	1267	1541	801	0.00618525	65	31	96
Phum<24>	370	449	5290	836	1210	420	-0.102366	7	57	64
*labeled CAFE tree:	((((((Alyc<0>,Dpte<2>)<1>,Turt<4>)<3>,((Mocc<6>,Isca<8>)<7>,((Ptep<10>,Cscu<12>)<11>,Lpol<14>)<13>)<9>)<5>,((((((Agam<16>,Dmel<18>)<17>,Bmor<20>)<19>,Tcas<22>)<21>,Phum<24>)<23>,Dpul<26>)<25>,Smar<28>)<27>)<15>,Cele<30>)<29>,(Drer<32>,Hsap<34>)<33>)<31>
**abbreviations: Alyc, Aculopys lycopersici; Agam, Anopheles gambiae; Bmor, Bombyx mori, Cele, Caenorhabditis elegans; Cscu, Centruroides sculpturatus; Drer, Danio rerio; Dpte, Dermatophagoides pteronyssinus; Dpul, Daphnia pulex; Dmel, Drosophila melanogaster; Hsap, Homo sapiens; Iscap, Ixodes scapularis; Lpol, Limulus polyphemus; Mocc, Metaseiulus occidentalis; Parasteatoda tepidariorum, Ptep; P…

## Sheet: Table_S5
Click on tabs at bottom to view each of Table S1-20.
Table S5. Rapidly evolving (expanding or contracting) orthogroups according to the CAFE analysis. The total number of rapidly evolving orthogroups for each branch can be found in the "Total Sig Changes" column of Table S4.
Branch of tree used in CAFE*	Orthogroups**
Overall rapid	OG0000014	OG0000016	OG0000021	OG0000023	OG0000024	OG0000025	OG0000026	OG0000027	OG0000029	OG0000030	OG0000031	OG0000037	OG0000038	OG0000039	OG0000040	OG0000044	OG0000045	OG0000047	OG0000048	OG0000050	OG0000051	OG0000052	OG0000053	OG0000054	OG0000055	OG0000056	OG0000058	OG0000059	OG0000060	OG0000061	OG0000062	OG0000064	OG0000065	OG0000066	OG0000067	OG0000068	OG0000070	OG0000071	OG0000072	OG0000073	OG0000074	OG0000075	OG0000076	OG0000077	OG0000078	OG0000079	OG0000080	OG0000081	OG0000086
<11>	OG0000014[+7*]	OG0000016[+6*]	OG0000024[+7*]	OG0000027[+8*]	OG0000038[+5*]	OG0000040[+3*]	OG0000044[+15*]	OG0000045[+11*]	OG0000048[+8*]	OG0000052[+3*]	OG0000055[+5*]	OG0000060[+3*]	OG0000071[+9*]	OG0000075[+3*]	OG0000077[+6*]	OG0000080[+8*]	OG0000088[+3*]	OG0000097[+7*]	OG0000101[+7*]	OG0000105[+3*]	OG0000112[+15*]	OG0000122[+6*]	OG0000125[+6*]	OG0000144[+6*]	OG0000148[+6*]	OG0000152[+3*]	OG0000162[+5*]	OG0000171[+3*]	OG0000174[+3*]	OG0000177[+5*]	OG0000183[+10*]	OG0000186[+2*]	OG0000200[+3*]	OG0000201[+2*]	OG0000204[+5*]	OG0000211[+2*]	OG0000212[+3*]	OG0000239[+2*]	OG0000280[+3*]	OG0000321[+6*]	OG0000333[+4*]	OG0000334[+9*]	OG0000341[+1*]	OG0000396[+2*]	OG0000420[+1*]	OG0000440[+7*]	OG0000455[+2*]	OG0000481[+1*]	OG0000554[+2*]
Cele<30>***	OG0000030[+23*]	OG0000039[+55*]	OG0000044[+16*]	OG0000060[+13*]	OG0000067[+19*]	OG0000073[+12*]	OG0000076[+15*]	OG0000078[+6*]	OG0000079[+14*]	OG0000089[+27*]	OG0000090[+8*]	OG0000097[+11*]	OG0000098[+6*]	OG0000102[+34*]	OG0000113[+7*]	OG0000119[+8*]	OG0000120[+19*]	OG0000151[+16*]	OG0000154[+5*]	OG0000163[+6*]	OG0000183[+6*]	OG0000201[+6*]	OG0000219[+14*]	OG0000223[+9*]	OG0000230[+18*]	OG0000239[+8*]	OG0000243[+11*]	OG0000248[+5*]	OG0000252[+5*]	OG0000263[+8*]	OG0000302[+8*]	OG0000314[+12*]	OG0000338[+8*]	OG0000352[+4*]	OG0000366[+4*]	OG0000379[+41*]	OG0000382[+5*]	OG0000411[+4*]	OG0000416[+18*]	OG0000464[+18*]	OG0000512[+13*]	OG0000563[+22*]	OG0000581[+10*]	OG0000629[+8*]	OG0000705[+3*]	OG0000724[+17*]	OG0000867[+14*]	OG0000885[+17*]	OG0000897[+9*]
<33>	OG0000023[+7*]	OG0000025[+9*]	OG0000031[+8*]	OG0000037[+12*]	OG0000061[+12*]	OG0000064[+6*]	OG0000067[+6*]	OG0000070[+7*]	OG0000074[+5*]	OG0000078[+9*]	OG0000081[+13*]	OG0000090[+7*]	OG0000091[+6*]	OG0000093[+7*]	OG0000098[+8*]	OG0000104[+4*]	OG0000106[+10*]	OG0000113[+7*]	OG0000114[+7*]	OG0000130[+4*]	OG0000134[+4*]	OG0000136[+5*]	OG0000160[+6*]	OG0000166[+8*]	OG0000167[+5*]	OG0000168[+4*]	OG0000173[+5*]	OG0000192[+4*]	OG0000203[+9*]	OG0000209[+4*]	OG0000211[+7*]	OG0000217[+6*]	OG0000218[+4*]	OG0000221[+4*]	OG0000223[+6*]	OG0000227[+6*]	OG0000233[+4*]	OG0000234[+5*]	OG0000241[+6*]	OG0000256[+9*]	OG0000257[+5*]	OG0000262[+9*]	OG0000267[+3*]	OG0000277[+4*]	OG0000283[+4*]	OG0000285[+3*]	OG0000287[+4*]	OG0000295[+4*]	OG0000301[+4*]
Dpul<26>	OG0000026[+8*]	OG0000038[+12*]	OG0000039[+9*]	OG0000040[+6*]	OG0000044[+13*]	OG0000047[+23*]	OG0000050[+31*]	OG0000052[+8*]	OG0000054[+12*]	OG0000056[+8*]	OG0000059[+11*]	OG0000060[+11*]	OG0000062[+6*]	OG0000066[+11*]	OG0000068[+7*]	OG0000072[+25*]	OG0000078[+7*]	OG0000081[+22*]	OG0000090[+5*]	OG0000096[+5*]	OG0000101[+15*]	OG0000102[+6*]	OG0000103[+18*]	OG0000106[+4*]	OG0000107[+7*]	OG0000108[+5*]	OG0000110[+11*]	OG0000111[+6*]	OG0000112[+9*]	OG0000113[+11*]	OG0000116[+15*]	OG0000125[+4*]	OG0000126[+38*]	OG0000137[+14*]	OG0000146[+10*]	OG0000149[+10*]	OG0000174[+28*]	OG0000179[+18*]	OG0000195[+40*]	OG0000199[+11*]	OG0000201[+26*]	OG0000204[+9*]	OG0000242[+25*]	OG0000253[+4*]	OG0000257[+6*]	OG0000265[+6*]	OG0000266[+5*]	OG0000279[+13*]	OG0000291[+19*]
Cscu<12>	OG0000014[+15*]	OG0000016[+10*]	OG0000021[+11*]	OG0000027[+18*]	OG0000029[+14*]	OG0000037[+12*]	OG0000044[+9*]	OG0000045[+35*]	OG0000048[+36*]	OG0000052[+16*]	OG0000054[+13*]	OG0000055[+26*]	OG0000060[+7*]	OG0000071[+7*]	OG0000075[+25*]	OG0000077[+34*]	OG0000080[+35*]	OG0000086[+11*]	OG0000097[+12*]	OG0000101[+38*]	OG0000106[+6*]	OG0000109[+6*]	OG0000112[+33*]	OG0000114[+5*]	OG0000116[+6*]	OG0000120[+5*]	OG0000135[+6*]	OG0000136[+12*]	OG0000144[+55*]	OG0000146[+7*]	OG0000148[+9*]	OG0000160[+9*]	OG0000165[+9*]	OG0000168[+6*]	OG0000171[+73*]	OG0000172[+5*]	OG0000177[+39*]	OG0000181[+5*]	OG0000183[+34*]	OG0000186[+8*]	OG0000209[+3*]	OG0000211[+9*]	OG0000212[+8*]	OG0000219[+4*]	OG0000236[+9*]	OG0000246[+6*]	OG0000252[+15*]	OG0000253[+21*]	OG0000260[+10*]
Isca<8>	OG0000014[+43*]	OG0000016[+8*]	OG0000021[+25*]	OG0000024[+60*]	OG0000026[+24*]	OG0000027[+23*]	OG0000030[+26*]	OG0000031[+16*]	OG0000037[+13*]	OG0000038[+54*]	OG0000045[+7*]	OG0000050[+24*]	OG0000052[+15*]	OG0000053[+19*]	OG0000059[+14*]	OG0000060[+46*]	OG0000080[+24*]	OG0000096[+6*]	OG0000097[+27*]	OG0000101[+41*]	OG0000102[+12*]	OG0000103[+4*]	OG0000109[+10*]	OG0000111[+26*]	OG0000116[+5*]	OG0000119[+5*]	OG0000122[+16*]	OG0000124[+6*]	OG0000127[+7*]	OG0000134[+7*]	OG0000148[+10*]	OG0000152[+7*]	OG0000159[+4*]	OG0000171[+17*]	OG0000176[+6*]	OG0000186[+5*]	OG0000196[+8*]	OG0000201[+13*]	OG0000204[+6*]	OG0000207[+23*]	OG0000236[+38*]	OG0000242[+12*]	OG0000248[+21*]	OG0000252[+11*]	OG0000259[+9*]	OG0000264[+5*]	OG0000266[+10*]	OG0000280[+3*]	OG0000291[+8*]
<25>	OG0000047[+3*]	OG0000054[+6*]	OG0000059[+4*]	OG0000110[+2*]	OG0000111[+3*]	OG0000132[+3*]	OG0000146[+2*]	OG0000149[+2*]	OG0000305[+2*]	OG0000353[+2*]	OG0000399[+3*]	OG0000552[+3*]	OG0000915[+2*]	OG0000005[+4*]	OG0000018[+22*]	OG0000016[-6*]	OG0000037[-2*]	OG0000077[-3*]	OG0000183[-2*]	OG0000370[-2*]	OG0000431[-2*]	OG0000571[-2*]	OG0001071[-2*]	OG0000009[-27*]	OG0000011[-2*]	OG0000046[-2*]
<21>	OG0000014[+9*]	OG0000021[+7*]	OG0000039[+5*]	OG0000040[+3*]	OG0000045[+3*]	OG0000073[+7*]	OG0000097[+2*]	OG0000111[+3*]	OG0000124[+6*]	OG0000132[+6*]	OG0000147[+4*]	OG0000154[+2*]	OG0000186[+2*]	OG0000198[+2*]	OG0000250[+4*]	OG0000261[+3*]	OG0000274[+2*]	OG0000276[+2*]	OG0000320[+4*]	OG0000388[+1*]	OG0000415[+1*]	OG0000443[+2*]	OG0000552[+2*]	OG0000570[+2*]	OG0000638[+2*]	OG0000730[+3*]	OG0000913[+1*]	OG0001094[+1*]	OG0001118[+1*]	OG0001262[+1*]	OG0001352[+1*]	OG0001755[+1*]	OG0001901[+1*]	OG0000000[+12*]	OG0000018[+10*]	OG0000179[-2*]	OG0000017[-2*]
<27>	OG0000054[+4*]	OG0000103[+2*]	OG0000132[+2*]	OG0000570[+1*]	OG0000018[+14*]	OG0000030[-3*]	OG0000060[-2*]	OG0000102[-2*]	OG0000166[-2*]	OG0000259[-3*]	OG0000009[-5*]	OG0000013[-2*]	OG0000046[-2*]	OG0000092[-2*]
Dpte<2>	OG0000125[+11*]	OG0000179[+5*]	OG0000259[+4*]	OG0000353[+3*]	OG0000373[+56*]	OG0000386[+3*]	OG0000431[+14*]	OG0000454[+3*]	OG0000464[+13*]	OG0000897[+4*]	OG0000968[+26*]	OG0000987[+3*]	OG0001003[+4*]	OG0001118[+4*]	OG0000002[+40*]	OG0000004[+27*]	OG0000006[+27*]	OG0000007[+11*]	OG0000009[+11*]	OG0000016[-6*]	OG0000024[-4*]	OG0000030[-6*]	OG0000044[-3*]	OG0000059[-4*]	OG0000081[-2*]	OG0000108[-4*]	OG0000110[-4*]	OG0000162[-3*]	OG0000171[-2*]	OG0000195[-3*]	OG0000200[-3*]	OG0000246[-3*]	OG0000250[-2*]	OG0000279[-2*]	OG0000354[-2*]	OG0000461[-3*]	OG0000518[-2*]	OG0000554[-2*]	OG0000563[-2*]	OG0000857[-2*]	OG0000005[-6*]
<23>	OG0000014[+3*]	OG0000054[+3*]	OG0000132[+7*]	OG0000147[+2*]	OG0000261[+2*]	OG0000320[+1*]	OG0000730[+1*]	OG0000844[+1*]	OG0001037[+1*]	OG0001352[+1*]	OG0001755[+1*]	OG0001885[+1*]	OG0000000[+8*]	OG0000016[-2*]	OG0000030[-3*]	OG0000038[-2*]	OG0000044[-3*]	OG0000050[-3*]	OG0000060[-2*]	OG0000126[-4*]	OG0000201[-3*]	OG0000242[-2*]	OG0000259[-2*]	OG0000269[-2*]	OG0000279[-2*]	OG0000369[-2*]	OG0000413[-2*]	OG0000438[-2*]	OG0000625[-2*]	OG0000676[-2*]	OG0000735[-2*]	OG0000942[-2*]	OG0000009[-5*]	OG0000017[-5*]	OG0000028[-2*]	OG0000035[-2*]	OG0000117[-2*]
Lpol<14>	OG0000016[+24*]	OG0000023[+26*]	OG0000025[+19*]	OG0000026[+43*]	OG0000037[+26*]	OG0000047[+16*]	OG0000056[+22*]	OG0000058[+23*]	OG0000059[+17*]	OG0000061[+10*]	OG0000064[+9*]	OG0000065[+13*]	OG0000067[+6*]	OG0000068[+7*]	OG0000070[+19*]	OG0000072[+12*]	OG0000074[+20*]	OG0000076[+13*]	OG0000079[+24*]	OG0000081[+10*]	OG0000089[+23*]	OG0000091[+14*]	OG0000093[+18*]	OG0000094[+13*]	OG0000104[+21*]	OG0000106[+7*]	OG0000107[+7*]	OG0000111[+4*]	OG0000114[+9*]	OG0000115[+6*]	OG0000124[+4*]	OG0000126[+7*]	OG0000127[+19*]	OG0000130[+18*]	OG0000132[+5*]	OG0000133[+9*]	OG0000135[+9*]	OG0000136[+11*]	OG0000159[+10*]	OG0000160[+8*]	OG0000163[+8*]	OG0000165[+7*]	OG0000166[+9*]	OG0000173[+14*]	OG0000182[+6*]	OG0000195[+6*]	OG0000196[+12*]	OG0000215[+8*]	OG0000216[+14*]
Turt<4>	OG0000016[+7*]	OG0000021[+25*]	OG0000026[+17*]	OG0000030[+40*]	OG0000031[+6*]	OG0000048[+6*]	OG0000051[+23*]	OG0000058[+7*]	OG0000062[+30*]	OG0000076[+8*]	OG0000088[+27*]	OG0000097[+4*]	OG0000099[+44*]	OG0000108[+16*]	OG0000110[+8*]	OG0000124[+13*]	OG0000127[+4*]	OG0000151[+22*]	OG0000154[+6*]	OG0000161[+6*]	OG0000169[+17*]	OG0000172[+4*]	OG0000182[+5*]	OG0000187[+30*]	OG0000191[+8*]	OG0000198[+4*]	OG0000199[+26*]	OG0000255[+22*]	OG0000259[+20*]	OG0000272[+5*]	OG0000273[+16*]	OG0000291[+3*]	OG0000292[+30*]	OG0000294[+3*]	OG0000299[+8*]	OG0000300[+52*]	OG0000302[+27*]	OG0000320[+20*]	OG0000326[+4*]	OG0000352[+6*]	OG0000353[+3*]	OG0000354[+14*]	OG0000357[+3*]	OG0000359[+5*]	OG0000363[+5*]	OG0000389[+16*]	OG0000396[+3*]	OG0000438[+4*]	OG0000450[+4*]
Ptep<10>	OG0000014[+14*]	OG0000016[+19*]	OG0000024[+28*]	OG0000026[+12*]	OG0000027[+19*]	OG0000030[+30*]	OG0000038[+19*]	OG0000040[+17*]	OG0000044[+49*]	OG0000045[+9*]	OG0000047[+8*]	OG0000058[+15*]	OG0000066[+7*]	OG0000068[+7*]	OG0000071[+24*]	OG0000073[+21*]	OG0000088[+7*]	OG0000097[+11*]	OG0000099[+4*]	OG0000102[+8*]	OG0000103[+19*]	OG0000105[+53*]	OG0000108[+18*]	OG0000112[+12*]	OG0000115[+5*]	OG0000122[+42*]	OG0000124[+6*]	OG0000125[+49*]	OG0000131[+15*]	OG0000148[+11*]	OG0000152[+10*]	OG0000161[+8*]	OG0000162[+21*]	OG0000169[+5*]	OG0000172[+6*]	OG0000174[+57*]	OG0000199[+9*]	OG0000200[+34*]	OG0000201[+24*]	OG0000204[+13*]	OG0000207[+4*]	OG0000208[+11*]	OG0000222[+7*]	OG0000223[+3*]	OG0000239[+10*]	OG0000242[+4*]	OG0000259[+4*]	OG0000263[+3*]	OG0000266[+4*]
Bmor<20>	OG0000016[+5*]	OG0000021[+23*]	OG0000026[+11*]	OG0000029[+17*]	OG0000039[+10*]	OG0000040[+7*]	OG0000045[+9*]	OG0000048[+13*]	OG0000054[+6*]	OG0000062[+5*]	OG0000075[+6*]	OG0000099[+9*]	OG0000112[+16*]	OG0000132[+8*]	OG0000144[+6*]	OG0000151[+12*]	OG0000171[+2*]	OG0000172[+3*]	OG0000177[+2*]	OG0000181[+7*]	OG0000198[+7*]	OG0000236[+5*]	OG0000240[+4*]	OG0000241[+3*]	OG0000261[+4*]	OG0000388[+14*]	OG0000443[+8*]	OG0000450[+7*]	OG0000455[+4*]	OG0000474[+4*]	OG0000476[+6*]	OG0000532[+3*]	OG0000536[+3*]	OG0000587[+3*]	OG0000596[+3*]	OG0000678[+2*]	OG0000699[+2*]	OG0000788[+4*]	OG0000883[+2*]	OG0000902[+2*]	OG0001029[+6*]	OG0001031[+4*]	OG0001075[+2*]	OG0001077[+12*]	OG0001118[+2*]	OG0001152[+4*]	OG0001196[+2*]	OG0001262[+4*]	OG0001403[+3*]
Drer<32>	OG0000025[+8*]	OG0000030[+22*]	OG0000037[+20*]	OG0000038[+6*]	OG0000044[+5*]	OG0000050[+10*]	OG0000055[+7*]	OG0000061[+10*]	OG0000064[+8*]	OG0000065[+11*]	OG0000070[+8*]	OG0000074[+9*]	OG0000078[+16*]	OG0000080[+5*]	OG0000081[+64*]	OG0000086[+6*]	OG0000090[+13*]	OG0000091[+9*]	OG0000093[+8*]	OG0000096[+7*]	OG0000098[+13*]	OG0000101[+9*]	OG0000104[+7*]	OG0000105[+7*]	OG0000106[+49*]	OG0000108[+11*]	OG0000113[+16*]	OG0000114[+8*]	OG0000126[+7*]	OG0000127[+11*]	OG0000130[+5*]	OG0000136[+8*]	OG0000160[+6*]	OG0000166[+12*]	OG0000167[+8*]	OG0000168[+13*]	OG0000191[+5*]	OG0000192[+10*]	OG0000203[+10*]	OG0000209[+12*]	OG0000211[+12*]	OG0000217[+9*]	OG0000218[+11*]	OG0000221[+10*]	OG0000222[+4*]	OG0000227[+7*]	OG0000233[+5*]	OG0000234[+7*]	OG0000241[+8*]
Mocc<6>	OG0000051[+6*]	OG0000077[+22*]	OG0000078[+13*]	OG0000088[+8*]	OG0000090[+12*]	OG0000098[+13*]	OG0000099[+6*]	OG0000108[+8*]	OG0000112[+11*]	OG0000113[+11*]	OG0000128[+6*]	OG0000147[+9*]	OG0000162[+11*]	OG0000177[+19*]	OG0000183[+4*]	OG0000187[+24*]	OG0000208[+4*]	OG0000292[+2*]	OG0000294[+31*]	OG0000299[+11*]	OG0000365[+4*]	OG0000393[+5*]	OG0000400[+4*]	OG0000431[+10*]	OG0000440[+3*]	OG0000493[+8*]	OG0000512[+4*]	OG0000587[+4*]	OG0000714[+25*]	OG0000752[+3*]	OG0000818[+3*]	OG0000868[+2*]	OG0000883[+9*]	OG0001031[+2*]	OG0001118[+7*]	OG0001262[+4*]	OG0001897[+6*]	OG0002413[+2*]	OG0000002[+504*]	OG0000004[+173*]	OG0000006[+301*]	OG0000007[+49*]	OG0000009[+207*]	OG0000011[+97*]	OG0000013[+29*]	OG0000019[+40*]	OG0000033[+36*]	OG0000036[+191*]	OG0000046[+104*]
Dmel<18>	OG0000031[+8*]	OG0000039[+6*]	OG0000040[+6*]	OG0000060[+26*]	OG0000062[+6*]	OG0000071[+7*]	OG0000073[+7*]	OG0000078[+13*]	OG0000090[+14*]	OG0000098[+11*]	OG0000103[+6*]	OG0000113[+14*]	OG0000120[+10*]	OG0000124[+5*]	OG0000133[+4*]	OG0000161[+10*]	OG0000186[+11*]	OG0000191[+5*]	OG0000209[+16*]	OG0000218[+6*]	OG0000243[+4*]	OG0000263[+6*]	OG0000266[+12*]	OG0000274[+5*]	OG0000326[+5*]	OG0000338[+7*]	OG0000352[+2*]	OG0000396[+5*]	OG0000400[+5*]	OG0000411[+6*]	OG0000465[+5*]	OG0000552[+5*]	OG0000605[+2*]	OG0000705[+3*]	OG0000752[+2*]	OG0000846[+6*]	OG0001023[+5*]	OG0001037[+5*]	OG0001658[+3*]	OG0002043[+8*]	OG0000005[+32*]	OG0000007[+1*]	OG0000028[+12*]	OG0000021[-7*]	OG0000030[-3*]	OG0000038[-5*]	OG0000048[-5*]	OG0000052[-6*]	OG0000072[-3*]
<13>	OG0000016[+12*]	OG0000023[+4*]	OG0000025[+3*]	OG0000026[+9*]	OG0000027[+5*]	OG0000029[+3*]	OG0000037[+6*]	OG0000038[+3*]	OG0000044[+8*]	OG0000047[+4*]	OG0000055[+4*]	OG0000056[+4*]	OG0000058[+6*]	OG0000066[+3*]	OG0000068[+3*]	OG0000070[+4*]	OG0000074[+4*]	OG0000075[+5*]	OG0000079[+3*]	OG0000080[+3*]	OG0000089[+3*]	OG0000091[+2*]	OG0000093[+3*]	OG0000103[+2*]	OG0000106[+2*]	OG0000112[+3*]	OG0000114[+3*]	OG0000115[+2*]	OG0000122[+5*]	OG0000125[+3*]	OG0000126[+2*]	OG0000130[+2*]	OG0000132[+1*]	OG0000133[+2*]	OG0000135[+3*]	OG0000136[+3*]	OG0000148[+2*]	OG0000152[+3*]	OG0000160[+3*]	OG0000162[+4*]	OG0000163[+2*]	OG0000168[+2*]	OG0000172[+3*]	OG0000173[+2*]	OG0000174[+1*]	OG0000182[+3*]	OG0000196[+2*]	OG0000204[+2*]	OG0000211[+2*]
Tcas<22>	OG0000014[+32*]	OG0000021[+13*]	OG0000027[+7*]	OG0000051[+14*]	OG0000052[+13*]	OG0000064[+9*]	OG0000071[+7*]	OG0000073[+7*]	OG0000080[+6*]	OG0000096[+11*]	OG0000101[+3*]	OG0000107[+8*]	OG0000108[+7*]	OG0000111[+8*]	OG0000124[+9*]	OG0000132[+20*]	OG0000154[+7*]	OG0000177[+5*]	OG0000183[+5*]	OG0000198[+5*]	OG0000212[+4*]	OG0000239[+7*]	OG0000250[+7*]	OG0000301[+3*]	OG0000302[+7*]	OG0000320[+6*]	OG0000365[+5*]	OG0000380[+3*]	OG0000420[+9*]	OG0000426[+4*]	OG0000443[+5*]	OG0000455[+4*]	OG0000461[+3*]	OG0000525[+4*]	OG0000554[+3*]	OG0000567[+3*]	OG0000605[+3*]	OG0000694[+3*]	OG0000730[+9*]	OG0000844[+5*]	OG0000863[+4*]	OG0001026[+16*]	OG0002646[+2*]	OG0000000[+33*]	OG0000002[+112*]	OG0000004[+140*]	OG0000006[+28*]	OG0000007[+59*]	OG0000011[+5*]
<17>	OG0000014[+4*]	OG0000037[+6*]	OG0000047[+7*]	OG0000073[+5*]	OG0000090[+3*]	OG0000113[+2*]	OG0000120[+5*]	OG0000124[+6*]	OG0000149[+3*]	OG0000169[+2*]	OG0000209[+3*]	OG0000243[+3*]	OG0000250[+4*]	OG0000287[+2*]	OG0000292[+4*]	OG0000311[+2*]	OG0000400[+4*]	OG0000552[+4*]	OG0000705[+1*]	OG0000730[+2*]	OG0000752[+1*]	OG0000836[+1*]	OG0000868[+1*]	OG0001023[+2*]	OG0001095[+1*]	OG0003286[+1*]	OG0000000[+8*]	OG0000005[+23*]	OG0000028[+6*]	OG0000016[-2*]	OG0000106[-2*]	OG0000112[-2*]	OG0000568[-2*]	OG0001152[-2*]	OG0001201[-2*]	OG0002215[-2*]	OG0000009[-8*]	OG0000011[-5*]	OG0000017[-2*]
<15>	OG0000016[+4*]	OG0000026[+4*]	OG0000045[+2*]	OG0000047[+2*]	OG0000048[+3*]	OG0000054[+3*]	OG0000058[+4*]	OG0000059[+3*]	OG0000068[+4*]	OG0000088[+1*]	OG0000103[+2*]	OG0000159[+2*]	OG0000179[+2*]	OG0000250[+1*]	OG0000317[+1*]	OG0000000[+24*]	OG0000009[+24*]	OG0000010[+3*]	OG0000030[-4*]	OG0000039[-5*]	OG0000067[-3*]	OG0000078[-2*]	OG0000090[-3*]	OG0000098[-3*]	OG0000102[-2*]	OG0000113[-2*]	OG0000223[-3*]	OG0000368[-2*]	OG0000512[-2*]	OG0000017[-13*]	OG0000020[-3*]	OG0000028[-10*]	OG0000035[-4*]
<19>	OG0000039[+4*]	OG0000040[+3*]	OG0000097[+3*]	OG0000147[+3*]	OG0000171[+1*]	OG0000186[+3*]	OG0000263[+2*]	OG0000274[+2*]	OG0000276[+2*]	OG0000311[+2*]	OG0000372[+1*]	OG0000388[+3*]	OG0000400[+1*]	OG0000415[+2*]	OG0000476[+2*]	OG0000504[+1*]	OG0001007[+1*]	OG0001020[+3*]	OG0001023[+2*]	OG0001031[+1*]	OG0001262[+3*]	OG0001885[+1*]	OG0000005[+11*]	OG0000018[+8*]	OG0000102[-3*]	OG0000108[-2*]	OG0000183[-2*]	OG0000265[-2*]	OG0000017[-3*]	OG0000036[-3*]
<9>	OG0000014[+5*]	OG0000016[+12*]	OG0000024[+8*]	OG0000026[+11*]	OG0000027[+9*]	OG0000029[+5*]	OG0000037[+4*]	OG0000038[+9*]	OG0000040[+3*]	OG0000045[+5*]	OG0000058[+3*]	OG0000060[+4*]	OG0000077[+11*]	OG0000080[+5*]	OG0000088[+3*]	OG0000097[+2*]	OG0000101[+4*]	OG0000103[+2*]	OG0000104[+2*]	OG0000109[+2*]	OG0000112[+3*]	OG0000114[+2*]	OG0000122[+9*]	OG0000125[+5*]	OG0000134[+3*]	OG0000135[+2*]	OG0000144[+3*]	OG0000146[+2*]	OG0000147[+2*]	OG0000148[+3*]	OG0000152[+2*]	OG0000161[+2*]	OG0000162[+7*]	OG0000165[+2*]	OG0000171[+2*]	OG0000172[+2*]	OG0000177[+4*]	OG0000195[+2*]	OG0000196[+2*]	OG0000204[+3*]	OG0000207[+3*]	OG0000208[+2*]	OG0000211[+2*]	OG0000215[+2*]	OG0000236[+3*]	OG0000242[+2*]	OG0000267[+1*]	OG0000279[+2*]	OG0000280[+1*]
Alyc<0>	OG0000546[+4*]	OG0000583[+3*]	OG0002260[+4*]	OG0000007[+4*]	OG0000014[-5*]	OG0000021[-14*]	OG0000023[-8*]	OG0000025[-5*]	OG0000026[-12*]	OG0000029[-4*]	OG0000030[-7*]	OG0000031[-9*]	OG0000044[-3*]	OG0000045[-3*]	OG0000050[-7*]	OG0000051[-8*]	OG0000052[-3*]	OG0000056[-4*]	OG0000062[-5*]	OG0000065[-5*]	OG0000070[-3*]	OG0000071[-5*]	OG0000074[-4*]	OG0000077[-2*]	OG0000078[-3*]	OG0000079[-4*]	OG0000086[-4*]	OG0000089[-3*]	OG0000096[-5*]	OG0000097[-5*]	OG0000099[-5*]	OG0000102[-4*]	OG0000106[-3*]	OG0000107[-3*]	OG0000109[-5*]	OG0000114[-3*]	OG0000119[-4*]	OG0000122[-2*]	OG0000124[-4*]	OG0000125[-4*]	OG0000126[-3*]	OG0000127[-3*]	OG0000134[-3*]	OG0000135[-5*]	OG0000148[-3*]	OG0000159[-4*]	OG0000163[-3*]	OG0000165[-3*]	OG0000168[-3*]
Hsap<34>	OG0000031[+8*]	OG0000077[+6*]	OG0000256[+6*]	OG0000259[+5*]	OG0000357[+5*]	OG0000400[+6*]	OG0000550[+32*]	OG0000687[+23*]	OG0000757[+25*]	OG0000848[+15*]	OG0001776[+5*]	OG0000000[+475*]	OG0000013[+13*]	OG0000033[+5*]	OG0000016[-4*]	OG0000027[-2*]	OG0000044[-6*]	OG0000047[-2*]	OG0000055[-5*]	OG0000079[-4*]	OG0000081[-11*]	OG0000101[-4*]	OG0000106[-9*]	OG0000112[-2*]	OG0000125[-2*]	OG0000147[-2*]	OG0000186[-4*]	OG0000280[-2*]	OG0000341[-7*]	OG0000377[-6*]	OG0000406[-4*]	OG0000504[-2*]	OG0000629[-3*]	OG0000676[-3*]	OG0000731[-2*]	OG0000004[-6*]	OG0000015[-12*]	OG0000020[-48*]	OG0000032[-7*]
<3>	OG0000110[+3*]	OG0000151[+4*]	OG0000273[+9*]	OG0000292[+2*]	OG0000461[+2*]	OG0001003[+2*]	OG0000014[-4*]	OG0000024[-6*]	OG0000029[-7*]	OG0000037[-8*]	OG0000038[-8*]	OG0000044[-3*]	OG0000045[-5*]	OG0000047[-3*]	OG0000050[-4*]	OG0000052[-6*]	OG0000055[-5*]	OG0000059[-4*]	OG0000060[-8*]	OG0000061[-3*]	OG0000067[-3*]	OG0000070[-3*]	OG0000073[-5*]	OG0000075[-7*]	OG0000077[-3*]	OG0000079[-3*]	OG0000080[-5*]	OG0000081[-2*]	OG0000086[-3*]	OG0000089[-3*]	OG0000090[-3*]	OG0000098[-2*]	OG0000101[-4*]	OG0000103[-3*]	OG0000111[-2*]	OG0000112[-2*]	OG0000120[-6*]	OG0000132[-2*]	OG0000137[-3*]	OG0000144[-2*]	OG0000146[-2*]	OG0000149[-2*]	OG0000166[-2*]	OG0000174[-2*]	OG0000176[-3*]	OG0000177[-2*]	OG0000186[-2*]	OG0000201[-4*]	OG0000204[-2*]
Agam<16>	OG0000014[+6*]	OG0000037[+35*]	OG0000038[+6*]	OG0000047[+15*]	OG0000048[+5*]	OG0000052[+11*]	OG0000053[+4*]	OG0000072[+4*]	OG0000081[+4*]	OG0000088[+3*]	OG0000097[+15*]	OG0000110[+4*]	OG0000124[+5*]	OG0000147[+21*]	OG0000149[+4*]	OG0000169[+8*]	OG0000192[+6*]	OG0000199[+5*]	OG0000217[+3*]	OG0000223[+4*]	OG0000250[+6*]	OG0000255[+4*]	OG0000257[+3*]	OG0000276[+4*]	OG0000287[+7*]	OG0000292[+8*]	OG0000319[+3*]	OG0000353[+15*]	OG0000355[+3*]	OG0000415[+4*]	OG0000430[+3*]	OG0000453[+4*]	OG0000476[+3*]	OG0000481[+2*]	OG0000504[+6*]	OG0000520[+2*]	OG0000524[+6*]	OG0000564[+3*]	OG0000570[+4*]	OG0000638[+7*]	OG0000878[+6*]	OG0001020[+4*]	OG0001024[+5*]	OG0001352[+12*]	OG0001885[+3*]	OG0001897[+4*]	OG0002646[+2*]	OG0003286[+6*]	OG0003724[+6*]
<1>	OG0000373[+1*]	OG0000021[-4*]	OG0000026[-3*]	OG0000029[-3*]	OG0000030[-9*]	OG0000044[-3*]	OG0000045[-2*]	OG0000062[-3*]	OG0000081[-2*]	OG0000099[-3*]	OG0000102[-2*]	OG0000108[-2*]	OG0000126[-2*]	OG0000127[-2*]	OG0000161[-2*]	OG0000199[-2*]	OG0000230[-2*]	OG0000299[-2*]	OG0000003[-4*]	OG0000005[-4*]	OG0000017[-2*]
<7>	OG0000014[+6*]	OG0000021[+10*]	OG0000024[+13*]	OG0000027[+6*]	OG0000038[+5*]	OG0000045[+4*]	OG0000050[+4*]	OG0000053[+15*]	OG0000077[+16*]	OG0000096[+4*]	OG0000101[+3*]	OG0000111[+8*]	OG0000146[+3*]	OG0000169[+3*]	OG0000177[+3*]	OG0000181[+3*]	OG0000187[+3*]	OG0000207[+3*]	OG0000236[+3*]	OG0000248[+3*]	OG0000294[+5*]	OG0000331[+3*]	OG0000389[+3*]	OG0000415[+2*]	OG0000538[+3*]	OG0000714[+2*]	OG0000845[+2*]	OG0000009[+14*]	OG0000010[+19*]	OG0000033[+6*]	OG0000036[+22*]	OG0000046[+14*]	OG0000044[-5*]	OG0000048[-3*]	OG0000054[-4*]	OG0000075[-7*]	OG0000219[-3*]	OG0000257[-2*]	OG0000261[-2*]	OG0000262[-2*]	OG0000310[-2*]	OG0000357[-2*]	OG0000370[-2*]	OG0000429[-2*]	OG0000454[-2*]	OG0000465[-2*]	OG0000536[-2*]	OG0000564[-2*]	OG0000581[-2*]
<5>	OG0000016[+6*]	OG0000026[+7*]	OG0000027[+4*]	OG0000088[+9*]	OG0000122[+2*]	OG0000125[+2*]	OG0000162[+2*]	OG0000171[+1*]	OG0000182[+2*]	OG0000187[+3*]	OG0000236[+1*]	OG0000273[+3*]	OG0000331[+1*]	OG0000363[+2*]	OG0000389[+1*]	OG0000539[+1*]	OG0000553[+1*]	OG0000594[+1*]	OG0000761[+1*]	OG0000767[+1*]	OG0000931[+1*]	OG0000987[+1*]	OG0001003[+1*]	OG0001007[+1*]	OG0001018[+1*]	OG0001071[+1*]	OG0001142[+1*]	OG0001283[+1*]	OG0000000[+9*]	OG0000010[+23*]	OG0000011[+3*]	OG0000013[+2*]	OG0000019[+3*]	OG0000033[+2*]	OG0000039[-15*]	OG0000078[-2*]	OG0000098[-2*]	OG0000113[-2*]	OG0000009[-4*]	OG0000017[-3*]	OG0000028[-5*]
<29>	OG0000000[+24*]	OG0000009[+24*]	OG0000081[-2*]	OG0000106[-2*]	OG0000319[-2*]	OG0000329[-2*]	OG0000003[-5*]	OG0000005[-5*]	OG0000015[-4*]	OG0000020[-7*]	OG0000028[-7*]	OG0000035[-11*]
Smar<28>	OG0000016[+53*]	OG0000055[+37*]	OG0000062[+8*]	OG0000068[+14*]	OG0000078[+5*]	OG0000086[+6*]	OG0000103[+13*]	OG0000131[+8*]	OG0000161[+5*]	OG0000176[+48*]	OG0000177[+8*]	OG0000179[+15*]	OG0000207[+4*]	OG0000218[+5*]	OG0000220[+6*]	OG0000222[+15*]	OG0000242[+5*]	OG0000255[+5*]	OG0000266[+7*]	OG0000274[+14*]	OG0000285[+6*]	OG0000288[+6*]	OG0000299[+9*]	OG0000331[+10*]	OG0000333[+14*]	OG0000357[+23*]	OG0000367[+6*]	OG0000370[+4*]	OG0000378[+5*]	OG0000383[+3*]	OG0000396[+4*]	OG0000414[+3*]	OG0000427[+30*]	OG0000429[+3*]	OG0000431[+3*]	OG0000470[+3*]	OG0000554[+10*]	OG0000571[+4*]	OG0000594[+3*]	OG0000605[+4*]	OG0000625[+11*]	OG0000735[+6*]	OG0000818[+4*]	OG0000868[+3*]	OG0000931[+2*]	OG0001026[+5*]	OG0001029[+9*]	OG0001066[+2*]	OG0001071[+4*]
Phum<24>	OG0000054[+10*]	OG0000059[+6*]	OG0000522[+3*]	OG0001528[+2*]	OG0000002[+2*]	OG0000004[+7*]	OG0000007[+2*]	OG0000014[-11*]	OG0000016[-4*]	OG0000021[-14*]	OG0000029[-9*]	OG0000037[-7*]	OG0000038[-4*]	OG0000039[-15*]	OG0000040[-6*]	OG0000044[-4*]	OG0000047[-8*]	OG0000050[-4*]	OG0000051[-6*]	OG0000052[-7*]	OG0000055[-5*]	OG0000060[-5*]	OG0000062[-9*]	OG0000073[-9*]	OG0000080[-4*]	OG0000097[-4*]	OG0000099[-5*]	OG0000101[-3*]	OG0000107[-5*]	OG0000109[-6*]	OG0000112[-3*]	OG0000119[-4*]	OG0000120[-7*]	OG0000137[-6*]	OG0000149[-4*]	OG0000151[-3*]	OG0000169[-3*]	OG0000177[-2*]	OG0000186[-5*]	OG0000239[-3*]	OG0000264[-3*]	OG0000274[-3*]	OG0000292[-2*]	OG0000302[-3*]	OG0000388[-2*]	OG0000554[-2*]	OG0000570[-3*]	OG0000639[-2*]	OG0000787[-2*]
*labeled CAFE tree:	((((((Alyc<0>,Dpte<2>)<1>,Turt<4>)<3>,((Mocc<6>,Isca<8>)<7>,((Ptep<10>,Cscu<12>)<11>,Lpol<14>)<13>)<9>)<5>,((((((Agam<16>,Dmel<18>)<17>,Bmor<20>)<19>,Tcas<22>)<21>,Phum<24>)<23>,Dpul<26>)<25>,Smar<28>)<27>)<15>,Cele<30>)<29>,(Drer<32>,Hsap<34>)<33>)<31>
** +, expansion, - contraction
***abbreviations: Alyc, Aculopys lycopersici; Agam, Anopheles gambiae; Bmor, Bombyx mori, Cele, Caenorhabditis elegans; Cscu, Centruroides sculpturatus; Drer, Danio rerio; Dpte, Dermatophagoides pteronyssinus; Dpul, Daphnia pulex; Dmel, Drosophila melanogaster; Hsap, Homo sapiens; Iscap, Ixodes scapularis; Lpol, Limulus polyphemus; Mocc, Metaseiulus occidentalis; Parasteatoda tepidariorum, Ptep; …
[truncated: 448 more columns]

## Sheet: Table_S6
Click on tabs at bottom to view each of Table S1-20.
Table S6. A. lycopersici orthogroups that are rapidly contracting and have more than 10 members, and the orthology (as determined by Orthofinder) of A. lycopersici proteins with those in other chelicerate species. A. lycopersici orthogroup members that are not shown, were not predicted to have orthologues in other chelicerate species.
Orthogroup	InterPro Description	Total number of members in A. lycopersci	Aculops_lycopersici	Centruroides_sculpturatus	Dermatophagoides_pteronyssinus	Ixodes_scapularis	Limulus_polyphemus	Metaseiulus_occidentalis	Parasteatoda_tepidariorum	Tetranychus_urticae	% orthology
OG0000000	Zinc finger C2H2-type	16	Alyc.aculy01g09300.1	Cscu.CSCU017331-RA	Dpte.g8222.t1	Isca.ISCW013678-RA	Lpol.rna14198, Lpol.rna4328	Mocc.rna15491	Ptep.aug3.g16510.t1	Turt.mRNA_tetur07g01570
OG0000000			Alyc.aculy01g31600.1	NA	Dpte.g8671.t1	Isca.ISCW019972-RA	Lpol.rna14707, Lpol.rna19571	Mocc.rna14556	Ptep.aug3.g8581.t2	Turt.mRNA_tetur08g02300, Turt.mRNA_tetur43g00440
OG0000000			Alyc.aculy01g35620.1	NA	Dpte.g11213.t1	Isca.ISCW014445-RA	Lpol.rna1739	Mocc.rna12555	Ptep.aug3.g16089.t1	Turt.mRNA_tetur14g03050
OG0000000			Alyc.aculy01g36440.1	Cscu.CSCU020802-RA	NA	Isca.ISCW013329-RA, Isca.ISCW012375-RA	Lpol.rna23800	Mocc.rna12810	Ptep.aug3.g23550.t1	Turt.mRNA_tetur293g00010
OG0000000			Alyc.aculy02g16860.1	Cscu.CSCU020017-RA	Dpte.g8680.t1	Isca.ISCW018034-RA	Lpol.rna16093	Mocc.rna15638	Ptep.aug3.g10003.t1	Turt.mRNA_tetur02g14430
OG0000000			Alyc.aculy02g17210.1	Cscu.CSCU025655-RA	Dpte.g11526.t1	Isca.ISCW018062-RA	Lpol.rna19419, Lpol.rna17737	Mocc.rna18240	Ptep.aug3.g9318.t1, Ptep.aug3.g17796.t1	Turt.mRNA_tetur08g05590, Turt.mRNA_tetur08g05600
OG0000000			Alyc.aculy02g20160.1	NA	Dpte.g10448.t1, Dpte.g7452.t1, Dpte.g7453.t1, Dpte.g76.t1, Dpte.g7318.t1, Dpte.g7094.t1, Dpte.g924.t1	Isca.ISCW001033-RA	Lpol.rna25336	NA	Ptep.aug3.g5767.t1	Turt.mRNA_tetur05g06080, Turt.mRNA_tetur01g13380
OG0000000			Alyc.aculy03g00920.1	Cscu.CSCU012838-RA	NA	Isca.ISCW019805-RA	Lpol.rna17795	Mocc.rna7468	Ptep.aug3.g961.t1	Turt.mRNA_tetur16g02430
OG0000000			Alyc.aculy03g10350.1	Cscu.CSCU020809-RA	Dpte.g8329.t1	Isca.ISCW009783-RA	Lpol.rna11120, Lpol.rna18307, Lpol.rna4200, Lpol.rna9965, Lpol.rna15561, Lpol.rna7450	Mocc.rna11329	Ptep.aug3.g14423.t1	Turt.mRNA_tetur07g03870
OG0000000			Alyc.aculy03g10510.1	Cscu.CSCU030034-RA	Dpte.g10789.t1	NA	Lpol.rna15723	Mocc.rna12495	Ptep.aug3.g10657.t1	Turt.mRNA_tetur16g01500, Turt.mRNA_tetur01g07180	62.5
OG0000003	Homeobox	29	Alyc.aculy01g04760.1	Cscu.CSCU030254-RA	NA	Isca.ISCW018031-RA	Lpol.rna9921	Mocc.rna825	Ptep.aug3.g1062.t1	Turt.mRNA_tetur05g01910
OG0000003			Alyc.aculy01g05690.1	Cscu.CSCU006313-RA, Cscu.CSCU026705-RA	Dpte.g8191.t1	Isca.ISCW021484-RA	Lpol.rna15440, Lpol.rna21505, Lpol.rna3033, Lpol.rna22059	Mocc.rna17061	Ptep.aug3.g16867.t1	Turt.mRNA_tetur02g09640
OG0000003			Alyc.aculy01g06790.1	Cscu.CSCU006455-RA	Dpte.g8882.t1	Isca.ISCW011755-RA	Lpol.rna20289	NA	Ptep.aug3.g10147.t1	NA
OG0000003			Alyc.aculy01g17870.1	Cscu.CSCU001126-RA, Cscu.CSCU022596-RA, Cscu.CSCU001125-RA, Cscu.CSCU018964-RA	Dpte.g564.t1	Isca.ISCW012144-RA	Lpol.rna18144, Lpol.rna7162, Lpol.rna17522, Lpol.rna6362, Lpol.rna9461	Mocc.rna8558	Ptep.aug3.g26210.t1, Ptep.aug3.g26211.t1, Ptep.aug3.g2297.t1	NA
OG0000003			Alyc.aculy01g24110.1	Cscu.CSCU010836-RA, Cscu.CSCU013524-RA	Dpte.g6905.t1	Isca.ISCW005223-RA	Lpol.rna23504, Lpol.rna15060, Lpol.rna12004, Lpol.rna6710	Mocc.rna10497	Ptep.aug3.g12478.t2, Ptep.aug3.g23341.t1, Ptep.aug3.g24765.t1	Turt.mRNA_tetur02g11920
OG0000003			Alyc.aculy01g25910.1	Cscu.CSCU013845-RA	Dpte.g11014.t1	Isca.ISCW005275-RA	Lpol.rna14255, Lpol.rna19209	Mocc.rna18271	Ptep.aug3.g3361.t1	Turt.mRNA_tetur01g02760, Turt.mRNA_tetur01g02770, Turt.mRNA_tetur01g02800
OG0000003			Alyc.aculy01g34650.1, Alyc.aculy01g34720.1	Cscu.CSCU010688-RA, Cscu.CSCU005351-RA	Dpte.g11933.t1, Dpte.g11536.t1	Isca.ISCW021061-RA	NA	Mocc.rna17631	NA	Turt.mRNA_tetur20g02430, Turt.mRNA_tetur20g02440
OG0000003			Alyc.aculy01g34700.1	Cscu.CSCU010690-RA, Cscu.CSCU005346-RA	Dpte.g11369.t1, Dpte.g10087.t1	Isca.ISCW021072-RA	Lpol.rna2659, Lpol.rna23860, Lpol.rna8338	Mocc.rna12305	Ptep.aug3.g17640.t1	Turt.mRNA_tetur20g02540
OG0000003			Alyc.aculy01g34710.1	Cscu.CSCU005348-RA, Cscu.CSCU010689-RA	Dpte.g11368.t1, Dpte.g10086.t1	Isca.ISCW021069-RA	Lpol.rna2660, Lpol.rna8337	Mocc.rna10607	Ptep.aug3.g1787.t1	NA
OG0000003			Alyc.aculy01g34740.1	Cscu.CSCU020691-RA, Cscu.CSCU004419-RA	Dpte.g11863.t1, Dpte.g10106.t1	Isca.ISCW021054-RA, Isca.ISCW021058-RA	Lpol.rna15492, Lpol.rna7481, Lpol.rna2663	Mocc.rna12542	Ptep.aug3.g25358.t1, Ptep.aug3.g15595.t1	Turt.mRNA_tetur20g02400
OG0000003			Alyc.aculy01g34760.1	Cscu.CSCU028980-RA, Cscu.CSCU004422-RA, Cscu.CSCU004421-RA	Dpte.g7920.t1	Isca.ISCW021042-RA	Lpol.rna24172, Lpol.rna9293, Lpol.rna2664	Mocc.rna8016	Ptep.aug3.g25355.t1, Ptep.aug3.g9048.t1	Turt.mRNA_tetur20g02350
OG0000003			Alyc.aculy01g35740.1	Cscu.CSCU015763-RA	Dpte.g6193.t1	Isca.ISCW001025-RA, Isca.ISCW001024-RA	Lpol.rna18441, Lpol.rna1093	Mocc.rna194	Ptep.aug3.g17585.t1	Turt.mRNA_tetur02g08870
OG0000003			Alyc.aculy01g38220.1	Cscu.CSCU016161-RA, Cscu.CSCU016162-RA	Dpte.g1032.t1	Isca.ISCW018938-RA, Isca.ISCW018939-RA	Lpol.rna21197, Lpol.rna14997, Lpol.rna8019, Lpol.rna16875, Lpol.rna8449, Lpol.rna22626, Lpol.rna371, Lpol.rna14998, Lpol.rna24192	Mocc.rna11139, Mocc.rna11141	Ptep.aug3.g15951.t1, Ptep.aug3.g8250.t2	Turt.mRNA_tetur20g03427, Turt.mRNA_tetur02g13510, Turt.mRNA_tetur02g13520, Turt.mRNA_tetur02g13540
OG0000003			Alyc.aculy02g01500.1	Cscu.CSCU005132-RA	Dpte.g4324.t1	Isca.ISCW024860-RA	Lpol.rna4504	NA	Ptep.aug3.g6223.t1	Turt.mRNA_tetur13g00230
OG0000003			Alyc.aculy02g16320.1	Cscu.CSCU030322-RA, Cscu.CSCU006452-RA	Dpte.g8819.t1	Isca.ISCW002347-RA	Lpol.rna3032	Mocc.rna18266	Ptep.aug3.g9802.t1, Ptep.aug3.g4167.t1	Turt.mRNA_tetur01g01560
OG0000003			Alyc.aculy02g16400.1	Cscu.CSCU006454-RA	Dpte.g8820.t1	Isca.ISCW014989-RA	Lpol.rna17851	NA	Ptep.aug3.g9800.t1	Turt.mRNA_tetur04g08350
OG0000003			Alyc.aculy02g16950.1	Cscu.CSCU017598-RA, Cscu.CSCU012585-RA	Dpte.g688.t1	Isca.ISCW008954-RA	Lpol.rna2192, Lpol.rna14807, Lpol.rna15801	Mocc.rna12612	Ptep.aug3.g12643.t1	Turt.mRNA_tetur01g07680
OG0000003			Alyc.aculy02g27040.1	Cscu.CSCU008610-RA, Cscu.CSCU022508-RA	Dpte.g4135.t1	Isca.ISCW022797-RA	Lpol.rna19836, Lpol.rna1979, Lpol.rna8268, Lpol.rna13351, Lpol.rna4689, Lpol.rna22062	Mocc.rna712	Ptep.aug3.g15983.t1	Turt.mRNA_tetur20g02980, Turt.mRNA_tetur20g03000, Turt.mRNA_tetur02g09110
OG0000003			Alyc.aculy02g29280.1, Alyc.aculy01g39110.1	Cscu.CSCU009972-RA, Cscu.CSCU010835-RA	NA	NA	Lpol.rna24751, Lpol.rna12005, Lpol.rna6711, Lpol.rna14809, Lpol.rna3466	Mocc.rna4149	Ptep.aug3.g26282.t1, Ptep.aug3.g24988.t1	NA
OG0000003			Alyc.aculy05g03320.1	Cscu.CSCU010281-RA	Dpte.g9006.t1	Isca.ISCW024206-RA	NA	NA	NA	Turt.mRNA_tetur27g01060
OG0000003			Alyc.aculy05g03430.1	Cscu.CSCU008264-RA, Cscu.CSCU016297-RA, Cscu.CSCU006456-RA, Cscu.CSCU008265-RA, Cscu.CSCU009122-RA	Dpte.g8823.t1, Dpte.g1357.t1	Isca.ISCW005496-RA	Lpol.rna15400, Lpol.rna18463	Mocc.rna9070, Mocc.rna7058	Ptep.aug3.g4533.t1, Ptep.aug3.g15189.t1, Ptep.aug3.g4165.t1	Turt.mRNA_tetur12g01090, Turt.mRNA_tetur14g02140, Turt.mRNA_tetur14g02130, Turt.mRNA_tetur14g02380, Turt.mRNA_tetur14g02160, Turt.mRNA_tetur14g02510
OG0000003			Alyc.aculy05g05760.1	Cscu.CSCU024305-RA	Dpte.g3658.t1	Isca.ISCW024331-RA, Isca.ISCW024609-RA	Lpol.rna17731	Mocc.rna12209	Ptep.aug3.g18073.t1	Turt.mRNA_tetur13g02740	75.8621
OG0000005	Serine proteases, trypsin	18	Alyc.aculy01g13360.1	Cscu.CSCU016389-RA, Cscu.CSCU017675-RA	Dpte.g3169.t1	Isca.ISCW011961-RA	NA	Mocc.rna15055	Ptep.aug3.g27310.t1	NA
OG0000005			Alyc.aculy01g37250.1	Cscu.CSCU018934-RA	Dpte.g11712.t1	Isca.ISCW012149-RA	Lpol.rna7193, Lpol.rna15684	Mocc.rna5734, Mocc.rna10222, Mocc.rna7553, Mocc.rna6792	Ptep.aug3.g20437.t1	Turt.mRNA_tetur22g01230, Turt.mRNA_tetur22g01200
OG0000005			Alyc.aculy02g06140.1	Cscu.CSCU004158-RA	Dpte.g11830.t1	NA	Lpol.rna24170	Mocc.rna11447	Ptep.aug3.g9155.t1	Turt.mRNA_tetur10g05360
OG0000005			Alyc.aculy02g14040.1	Cscu.CSCU001789-RA	Dpte.g10011.t1	NA	Lpol.rna24101	Mocc.rna3582	Ptep.aug3.g15440.t1, Ptep.aug3.g14151.t1	Turt.mRNA_tetur25g01410
OG0000005			Alyc.aculy02g18870.1	Cscu.CSCU010362-RA, Cscu.CSCU023594-RA	Dpte.g5185.t1	Isca.ISCW010211-RA	Lpol.rna11999, Lpol.rna7190	Mocc.rna8549, Mocc.rna5089, Mocc.rna16416	Ptep.aug3.g27638.t1, Ptep.aug3.g13157.t1	Turt.mRNA_tetur05g08950
OG0000005			Alyc.aculy02g21270.1	Cscu.CSCU026547-RA, Cscu.CSCU025197-RA, Cscu.CSCU017502-RA, Cscu.CSCU028387-RA	NA	Isca.ISCW003370-RA, Isca.ISCW018541-RA, Isca.ISCW002331-RA	Lpol.rna19932, Lpol.rna14939, Lpol.rna5705, Lpol.rna24131, Lpol.rna2899	Mocc.rna12080	Ptep.aug3.g17419.t1	Turt.mRNA_tetur09g00280
OG0000005			Alyc.aculy02g27820.1	Cscu.CSCU018935-RA, Cscu.CSCU023589-RA	Dpte.g7092.t1	Isca.ISCW001620-RA	NA	NA	Ptep.aug3.g13160.t1, Ptep.aug3.g20436.t2	Turt.mRNA_tetur05g08340
OG0000005			Alyc.aculy02g27890.1	Cscu.CSCU020356-RA	NA	NA	Lpol.rna23896, Lpol.rna19029, Lpol.rna4116, Lpol.rna4064	Mocc.rna4840, Mocc.rna7519	Ptep.aug3.g12647.t1, Ptep.aug3.g12646.t1	Turt.mRNA_tetur29g01570
OG0000005			Alyc.aculy03g03120.1	Cscu.CSCU026053-RA	NA	Isca.ISCW002695-RA	Lpol.rna9161, Lpol.rna7295	Mocc.rna14919, Mocc.rna11004	Ptep.aug3.g26402.t1, Ptep.aug3.g15441.t1	NA
OG0000005			Alyc.aculy04g05620.1	Cscu.CSCU021610-RA, Cscu.CSCU010363-RA, Cscu.CSCU023595-RA, Cscu.CSCU021608-RA, Cscu.CSCU021609-RA	Dpte.g4090.t1, Dpte.g421.t1	Isca.ISCW006432-RA	Lpol.rna22351, Lpol.rna11150	Mocc.rna12467	Ptep.aug3.g13156.t1, Ptep.aug3.g1483.t1, Ptep.aug3.g23338.t1	Turt.mRNA_tetur02g06940
OG0000005			Alyc.aculy05g06490.1	Cscu.CSCU001791-RA, Cscu.CSCU026839-RA	Dpte.g8052.t1	Isca.ISCW010999-RA	Lpol.rna23043, Lpol.rna7297	NA	Ptep.aug3.g1752.t1	NA	61.1111
OG0000014	Cytochrome P450	10	Alyc.aculy01g13870.1, Alyc.aculy05g00970.1, Alyc.aculy01g28380.1	Cscu.CSCU018713-RA	Dpte.g4964.t1, Dpte.g4965.t1	Isca.ISCW001241-RA, Isca.ISCW012000-RA, Isca.ISCW007953-RA, Isca.ISCW001105-RA, Isca.ISCW008019-RA, Isca.ISCW001103-RA, Isca.ISCW004905-RA, Isca.ISCW020282-RA, Isca.ISCW007954-RA, Isca.ISCW011997-RA, Isca.ISCW014319-RA, Isca.ISCW003160-RA, Isca.ISCW011998-RA, Isca.ISCW024583-RA, Isca.ISCW024274-RA, Isca.ISCW011996-RA, Isca.ISCW024701-RA, Isca.ISCW024674-RA, Isca.ISCW010184-RA, Isca.ISCW001104-RA,…	NA	Mocc.rna5116, Mocc.rna12444, Mocc.rna7240	Ptep.aug3.g18749.t1, Ptep.aug3.g14719.t1, Ptep.aug3.g21278.t1, Ptep.aug3.g14723.t1, Ptep.aug3.g14720.t1, Ptep.aug3.g18748.t1, Ptep.aug3.g14721.t1, Ptep.aug3.g14724.t1, Ptep.aug3.g14725.t1, Ptep.aug3.g18747.t1, Ptep.aug3.g14726.t1	Turt.mRNA_tetur03g01560	*
OG0000015	G-protein-coupled receptor, rhodopsin-like	10	Alyc.aculy01g21970.1	NA	Dpte.g8805.t1	NA	NA	Mocc.rna7470	Ptep.aug3.g12151.t1	Turt.mRNA_tetur16g00600
OG0000015			Alyc.aculy01g33970.1	Cscu.CSCU024408-RA, Cscu.CSCU014904-RA	Dpte.g11008.t1	Isca.ISCW008775-RA	Lpol.rna6460, Lpol.rna15240, Lpol.rna5767	NA	Ptep.aug3.g16752.t1, Ptep.aug3.g217.t1	Turt.mRNA_tetur01g10720, Turt.mRNA_tetur01g10700
OG0000015			Alyc.aculy02g01140.1	Cscu.CSCU029599-RA	Dpte.g9087.t1	Isca.ISCW019070-RA, Isca.ISCW019072-RA	Lpol.rna18095, Lpol.rna22650	Mocc.rna11199	Ptep.aug3.g12976.t1	Turt.mRNA_tetur15g02530
OG0000015			Alyc.aculy02g05100.1	Cscu.CSCU029642-RA, Cscu.CSCU029905-RA	Dpte.g11939.t1	Isca.ISCW001496-RA	Lpol.rna7859, Lpol.rna1620, Lpol.rna22087	Mocc.rna11342	Ptep.aug3.g24124.t1	Turt.mRNA_tetur02g05500
OG0000015			Alyc.aculy02g22470.1	Cscu.CSCU005198-RA	Dpte.g3694.t1	Isca.ISCW006077-RA, Isca.ISCW015254-RA, Isca.ISCW008917-RA	Lpol.rna19006, Lpol.rna5358, Lpol.rna4063	Mocc.rna4613	Ptep.aug3.g2787.t1, Ptep.aug3.g25321.t1	Turt.mRNA_tetur01g05910
OG0000015			Alyc.aculy02g22470.1	Cscu.CSCU005198-RA	Dpte.g3694.t1	Isca.ISCW006077-RA, Isca.ISCW015254-RA, Isca.ISCW008917-RA	Lpol.rna19006, Lpol.rna5358, Lpol.rna4063	Mocc.rna4613	Ptep.aug3.g25318.t1	Turt.mRNA_tetur01g05910
OG0000015			Alyc.aculy03g11600.1	NA	Dpte.g1165.t1, Dpte.g10886.t1	NA	NA	Mocc.rna8347	Ptep.aug3.g9680.t1	Turt.mRNA_tetur14g02750, Turt.mRNA_tetur03g06850, Turt.mRNA_tetur15g00030	70
OG0000025	Homeobox	12	Alyc.aculy01g00690.1	Cscu.CSCU024301-RA, Cscu.CSCU012569-RA	Dpte.g1098.t1	Isca.ISCW016210-RA	Lpol.rna21653, Lpol.rna11521, Lpol.rna7139	Mocc.rna14550, Mocc.rna14552	Ptep.aug3.g773.t1	Turt.mRNA_tetur04g00320
OG0000025			Alyc.aculy01g00690.1	Cscu.CSCU024301-RA, Cscu.CSCU012569-RA	Dpte.g1098.t1	Isca.ISCW016210-RA	Lpol.rna21653, Lpol.rna11521, Lpol.rna7139	Mocc.rna14550, Mocc.rna14552	Ptep.aug3.g2943.t1	Turt.mRNA_tetur04g00320
OG0000025			Alyc.aculy01g12620.1	Cscu.CSCU007998-RA, Cscu.CSCU020592-RA, Cscu.CSCU020591-RA	Dpte.g11624.t1	Isca.ISCW006445-RA, Isca.ISCW006446-RA	Lpol.rna8168, Lpol.rna59	Mocc.rna10241	Ptep.aug3.g12968.t1, Ptep.aug3.g13822.t1	Turt.mRNA_tetur18g03160
OG0000025			Alyc.aculy01g14690.1	Cscu.CSCU005066-RA, Cscu.CSCU008374-RA	Dpte.g1308.t1	Isca.ISCW024566-RA	Lpol.rna298, Lpol.rna2515, Lpol.rna20254, Lpol.rna23266, Lpol.rna3519	Mocc.rna9172, Mocc.rna9173	Ptep.aug3.g9172.t1, Ptep.aug3.g25936.t1	Turt.mRNA_tetur19g02530
OG0000025			Alyc.aculy01g17900.1	Cscu.CSCU030184-RA, Cscu.CSCU025176-RA, Cscu.CSCU000609-RA	Dpte.g7719.t1	NA	NA	Mocc.rna11313	Ptep.aug3.g6013.t1, Ptep.aug3.g21034.t1, Ptep.aug3.g4287.t1	Turt.mRNA_tetur14g00760
OG0000025			Alyc.aculy01g36650.1	Cscu.CSCU015671-RA	Dpte.g9500.t1	NA	Lpol.rna11961, Lpol.rna18749	Mocc.rna6594	Ptep.aug3.g7566.t1, Ptep.aug3.g26020.t1	Turt.mRNA_tetur02g06020
OG0000025			Alyc.aculy02g25540.1	Cscu.CSCU004322-RA	Dpte.g1603.t1	Isca.ISCW020265-RA	Lpol.rna12929	NA	Ptep.aug3.g14050.t1	Turt.mRNA_tetur21g02710
OG0000025			Alyc.aculy02g27970.1	NA	NA	NA	Lpol.rna21999	Mocc.rna7475	Ptep.aug3.g10202.t2, Ptep.aug3.g20598.t1	Turt.mRNA_tetur37g00780, Turt.mRNA_tetur37g00770
OG0000025			Alyc.aculy03g03420.1	Cscu.CSCU022240-RA	Dpte.g5050.t1	Isca.ISCW009634-RA	Lpol.rna20790, Lpol.rna8792, Lpol.rna1217	Mocc.rna15116	Ptep.aug3.g27186.t1	Turt.mRNA_tetur27g00570
OG0000025			Alyc.aculy03g06040.1	Cscu.CSCU015099-RA	Dpte.g5256.t1	NA	Lpol.rna25297, Lpol.rna14263, Lpol.rna9328	Mocc.rna13848	Ptep.aug3.g9068.t1	NA
OG0000025			Alyc.aculy04g02440.1	Cscu.CSCU025915-RA	Dpte.g3073.t1	NA	Lpol.rna1863, Lpol.rna18484, Lpol.rna15416	Mocc.rna1609	Ptep.aug3.g25875.t1, Ptep.aug3.g7763.t1	Turt.mRNA_tetur04g05170	91.6667
* as only few orthologous relationships are observed within this family (Feyereisen et al. 2015, doi: 10.1016/j.bbapap.2010.06.012) average orthology was not calculated											72.228	average orthology

## Sheet: Table_S7
Click on tabs at bottom to view each of Table S1-20.
Table S7. Orthogroups identifed across 18 metazoan species* using OrthoFinder							# proteins
Orthogroup ID	InterPro domain**	InterPro description**	GO Drosophila***	Expanded or contracted in A. lycopersici****	Rapidly expanded or contracted in A. lycopersici****	A. lycopersici has at least 5 members and twofold more members than the average number of members in D. pteronyssinus and T. urticae?	Alyc	Agam	Bmor	Cele	Cscu	Drer	Dpul	Dpte	Dmel	Hsap	Isca	Lpol	Mocc	Ptep	Phum	Smar	Turt	Tcas	Number of proteins in OrthoGroup	Number of species within OrthoGroup	Present in Arthropoda but not in A. lycopersici	Alyc_IDs	Agam_IDs	Bmor_IDs	Cele_IDs	Cscu_IDs	Drer_IDs		Dpul_Ids	Dpte_Ids	Dmel_IDs	Hsap_IDs	Isca_IDs	Lpol_IDs	Mocc_IDs	Ptep_IDs		Phum_IDs	Smar_IDs	Turt_IDs	Tcas_IDs
OG0000000	IPR013087	Domain Zinc finger C2H2-type	GO:0043035 ( chromatin insulator sequence binding ), GO:0005634 ( nucleus ), GO:0005515 ( protein binding ), GO:0000790 ( nuclear chromatin ), GO:0008270 ( zinc ion binding ), GO:0003677 ( DNA binding ), GO:0008270 ( zinc ion binding ), GO:0005634 ( nucleus ), GO:0003700 ( transcription factor activity, sequence-specific DNA binding ), GO:0006355 ( regulation of transcription, DNA-templated ), GO…	contraction	contraction		16	116	73	22	252	959	36	36	85	475	156	217	87	191	56	57	21	109	2964	18	NO	Alyc.aculy01g09040.1, Alyc.aculy01g09300.1, Alyc.aculy01g11740.1, Alyc.aculy01g31600.1, Alyc.aculy01g31610.1, Alyc.aculy01g35620.1, Alyc.aculy01g36440.1, Alyc.aculy02g06230.1, Alyc.aculy02g16030.1, Alyc.aculy02g16860.1, Alyc.aculy02g17210.1, Alyc.aculy02g20160.1, Alyc.aculy03g00920.1, Alyc.aculy03g10350.1, Alyc.aculy03g10510.1, Alyc.aculy05g03500.1	Agam.AGAP000141-RA, Agam.AGAP000164-RA, Agam.AGAP000196-RA, Agam.AGAP000507-RA, Agam.AGAP000587-RA, Agam.AGAP001132-RA, Agam.AGAP001258-RA, Agam.AGAP001555-RA, Agam.AGAP002041-RA, Agam.AGAP002241-RA, Agam.AGAP002433-RA, Agam.AGAP002702-RA, Agam.AGAP002705-RA, Agam.AGAP002918-RA, Agam.AGAP003056-RA, Agam.AGAP003111-RA, Agam.AGAP003224-RA, Agam.AGAP003364-RA, Agam.AGAP003562-RA, Agam.AGAP003566-RA,…	Bmor.transcript_BGIBMGA000376-RA, Bmor.transcript_BGIBMGA000521-RA, Bmor.transcript_BGIBMGA000905-RA, Bmor.transcript_BGIBMGA001069-RA, Bmor.transcript_BGIBMGA001139-RA, Bmor.transcript_BGIBMGA001661-RA, Bmor.transcript_BGIBMGA001680-RA, Bmor.transcript_BGIBMGA001681-RA, Bmor.transcript_BGIBMGA001682-RA, Bmor.transcript_BGIBMGA001684-RA, Bmor.transcript_BGIBMGA001685-RA, Bmor.transcript_BGIBMGA00…	Cele.Transcript_C10A4.8, Cele.Transcript_C46E10.8, Cele.Transcript_C46E10.9, Cele.Transcript_C55B7.12b, Cele.Transcript_F12E12.5, Cele.Transcript_F13G3.1, Cele.Transcript_F21A9.2, Cele.Transcript_F35H8.3, Cele.Transcript_F39B2.1, Cele.Transcript_F45B8.4, Cele.Transcript_F49H12.1a, Cele.Transcript_F52F12.4.1, Cele.Transcript_K11D2.4a, Cele.Transcript_R08E3.4b, Cele.Transcript_R11E3.6a, Cele.Transc…	Cscu.CSCU000395-RA, Cscu.CSCU000641-RA, Cscu.CSCU000642-RA, Cscu.CSCU000815-RA, Cscu.CSCU001459-RA, Cscu.CSCU002425-RA, Cscu.CSCU002426-RA, Cscu.CSCU002669-RA, Cscu.CSCU002670-RA, Cscu.CSCU002671-RA, Cscu.CSCU002674-RA, Cscu.CSCU002681-RA, Cscu.CSCU003571-RA, Cscu.CSCU003787-RA, Cscu.CSCU003789-RA, Cscu.CSCU004293-RA, Cscu.CSCU005001-RA, Cscu.CSCU005051-RA, Cscu.CSCU005133-RA, Cscu.CSCU005816-RA,…	Drer.transcript_ENSDART00000003884, Drer.transcript_ENSDART00000004071, Drer.transcript_ENSDART00000015379, Drer.transcript_ENSDART00000017305, Drer.transcript_ENSDART00000030658, Drer.transcript_ENSDART00000031485, Drer.transcript_ENSDART00000034414, Drer.transcript_ENSDART00000034783, Drer.transcript_ENSDART00000042770, Drer.transcript_ENSDART00000046783, Drer.transcript_ENSDART00000048104, Dre…	Drer.transcript_ENSDART00000171838, Drer.transcript_ENSDART00000171874, Drer.transcript_ENSDART00000171876, Drer.transcript_ENSDART00000171899, Drer.transcript_ENSDART00000171933, Drer.transcript_ENSDART00000171957, Drer.transcript_ENSDART00000171961, Drer.transcript_ENSDART00000171987, Drer.transcript_ENSDART00000172013, Drer.transcript_ENSDART00000172036, Drer.transcript_ENSDART00000172041, Dre…	Dpul.mRNA1050, Dpul.mRNA11006, Dpul.mRNA1180, Dpul.mRNA11952, Dpul.mRNA12030, Dpul.mRNA12248, Dpul.mRNA12466, Dpul.mRNA12816, Dpul.mRNA13320, Dpul.mRNA13875, Dpul.mRNA14184, Dpul.mRNA14353, Dpul.mRNA14786, Dpul.mRNA14932, Dpul.mRNA1496, Dpul.mRNA16587, Dpul.mRNA16727, Dpul.mRNA17569, Dpul.mRNA2512, Dpul.mRNA4394, Dpul.mRNA4502, Dpul.mRNA4801, Dpul.mRNA5111, Dpul.mRNA5123, Dpul.mRNA5315, Dpul.mRNA…	Dpte.g10095.t1, Dpte.g10330.t1, Dpte.g10334.t1, Dpte.g10335.t1, Dpte.g10448.t1, Dpte.g10789.t1, Dpte.g11213.t1, Dpte.g11526.t1, Dpte.g11918.t1, Dpte.g12288.t1, Dpte.g3436.t1, Dpte.g3499.t1, Dpte.g3760.t1, Dpte.g3784.t1, Dpte.g6369.t1, Dpte.g6898.t1, Dpte.g7094.t1, Dpte.g7318.t1, Dpte.g7325.t1, Dpte.g7452.t1, Dpte.g7453.t1, Dpte.g7565.t1, Dpte.g76.t1, Dpte.g8072.t1, Dpte.g8073.t1, Dpte.g8074.t1, D…	Dmel.FBtr0070487, Dmel.FBtr0070488, Dmel.FBtr0070925, Dmel.FBtr0071157, Dmel.FBtr0071158, Dmel.FBtr0072721, Dmel.FBtr0073380, Dmel.FBtr0073481, Dmel.FBtr0074066, Dmel.FBtr0074356, Dmel.FBtr0074807, Dmel.FBtr0075570, Dmel.FBtr0075787, Dmel.FBtr0075791, Dmel.FBtr0075862, Dmel.FBtr0076987, Dmel.FBtr0077442, Dmel.FBtr0077463, Dmel.FBtr0077515, Dmel.FBtr0078394, Dmel.FBtr0079341, Dmel.FBtr0079674, Dme…	Hsap.transcript_ENST00000155093, Hsap.transcript_ENST00000196489, Hsap.transcript_ENST00000219069, Hsap.transcript_ENST00000219478, Hsap.transcript_ENST00000221327, Hsap.transcript_ENST00000221665, Hsap.transcript_ENST00000222339, Hsap.transcript_ENST00000223428, Hsap.transcript_ENST00000228289, Hsap.transcript_ENST00000230122, Hsap.transcript_ENST00000232974, Hsap.transcript_ENST00000240499, Hsa…	Isca.ISCW000093-RA, Isca.ISCW000142-RA, Isca.ISCW000143-RA, Isca.ISCW000572-RA, Isca.ISCW000573-RA, Isca.ISCW000574-RA, Isca.ISCW000721-RA, Isca.ISCW000725-RA, Isca.ISCW000726-RA, Isca.ISCW000727-RA, Isca.ISCW000728-RA, Isca.ISCW000729-RA, Isca.ISCW000797-RA, Isca.ISCW001033-RA, Isca.ISCW001192-RA, Isca.ISCW001569-RA, Isca.ISCW001570-RA, Isca.ISCW001573-RA, Isca.ISCW002248-RA, Isca.ISCW002845-RA,…	Lpol.rna10675, Lpol.rna10676, Lpol.rna10959, Lpol.rna10960, Lpol.rna10964, Lpol.rna10966, Lpol.rna10967, Lpol.rna10968, Lpol.rna10970, Lpol.rna10971, Lpol.rna11120, Lpol.rna11227, Lpol.rna11447, Lpol.rna11448, Lpol.rna11537, Lpol.rna11539, Lpol.rna11540, Lpol.rna11566, Lpol.rna11810, Lpol.rna12008, Lpol.rna12010, Lpol.rna12406, Lpol.rna13437, Lpol.rna13950, Lpol.rna14198, Lpol.rna14229, Lpol.rna1…	Mocc.rna10455, Mocc.rna10460, Mocc.rna1069, Mocc.rna10715, Mocc.rna10861, Mocc.rna10870, Mocc.rna11173, Mocc.rna11329, Mocc.rna11490, Mocc.rna11492, Mocc.rna11717, Mocc.rna11808, Mocc.rna11809, Mocc.rna11829, Mocc.rna12494, Mocc.rna12495, Mocc.rna12526, Mocc.rna12555, Mocc.rna12807, Mocc.rna12810, Mocc.rna12811, Mocc.rna12812, Mocc.rna12813, Mocc.rna12814, Mocc.rna12816, Mocc.rna12817, Mocc.rna13…	Ptep.aug3.g10003.t1, Ptep.aug3.g10156.t1, Ptep.aug3.g10158.t1, Ptep.aug3.g10168.t1, Ptep.aug3.g10260.t1, Ptep.aug3.g10405.t1, Ptep.aug3.g10424.t1, Ptep.aug3.g10657.t1, Ptep.aug3.g1081.t2, Ptep.aug3.g1082.t1, Ptep.aug3.g10945.t1, Ptep.aug3.g10983.t1, Ptep.aug3.g11051.t1, Ptep.aug3.g11340.t1, Ptep.aug3.g1136.t1, Ptep.aug3.g11494.t1, Ptep.aug3.g11528.t1, Ptep.aug3.g11996.t1, Ptep.aug3.g12000.t1, Pte…		Phum.transcript_PHUM033920-RA, Phum.transcript_PHUM040000-RA, Phum.transcript_PHUM041520-RA, Phum.transcript_PHUM041790-RA, Phum.transcript_PHUM076560-RA, Phum.transcript_PHUM077940-RA, Phum.transcript_PHUM085430-RA, Phum.transcript_PHUM129470-RA, Phum.transcript_PHUM155140-RA, Phum.transcript_PHUM157190-RA, Phum.transcript_PHUM160610-RA, Phum.transcript_PHUM205170-RA, Phum.transcript_PHUM210140-…	Smar.transcript_SMAR000758-RA, Smar.transcript_SMAR001687-RA, Smar.transcript_SMAR001782-RA, Smar.transcript_SMAR002176-RA, Smar.transcript_SMAR002243-RA, Smar.transcript_SMAR002244-RA, Smar.transcript_SMAR002552-RA, Smar.transcript_SMAR002553-RA, Smar.transcript_SMAR002765-RA, Smar.transcript_SMAR002766-RA, Smar.transcript_SMAR003837-RA, Smar.transcript_SMAR003844-RA, Smar.transcript_SMAR003845-…	Turt.mRNA_tetur01g07180, Turt.mRNA_tetur01g13380, Turt.mRNA_tetur02g14430, Turt.mRNA_tetur05g06080, Turt.mRNA_tetur06g06290, Turt.mRNA_tetur07g01570, Turt.mRNA_tetur07g03870, Turt.mRNA_tetur08g02300, Turt.mRNA_tetur08g05590, Turt.mRNA_tetur08g05600, Turt.mRNA_tetur14g03050, Turt.mRNA_tetur16g01500, Turt.mRNA_tetur16g01570, Turt.mRNA_tetur16g02020, Turt.mRNA_tetur16g02080, Turt.mRNA_tetur16g02430,…	Tcas.transcript_TC000114_001, Tcas.transcript_TC000356_001, Tcas.transcript_TC000383_001, Tcas.transcript_TC000575_001, Tcas.transcript_TC000822_001, Tcas.transcript_TC000840_001, Tcas.transcript_TC001052_001, Tcas.transcript_TC001565_001, Tcas.transcript_TC002241_001, Tcas.transcript_TC002340_001, Tcas.transcript_TC002620_001, Tcas.transcript_TC002621_001, Tcas.transcript_TC002889_001, Tcas.tran…
OG0000001	IPR038717	Domain Tc1-like transposase, DDE domain	GO:0005515 ( protein binding ), GO:0005737 ( cytoplasm ), GO:0035145 ( exon-exon junction complex ), GO:0003723 ( RNA binding ), GO:0000184 ( nuclear-transcribed mRNA catabolic process, nonsense-mediated decay ), GO:1990448 ( exon-exon junction complex binding ), GO:0031370 ( eukaryotic initiation factor 4G binding ), GO:0002191 ( cap-dependent translational initiation ), GO:1903259 ( exon-exon j…	expansion	NA		11	4	20	3	231	11	9	12	6	5	22	27	32	1949	5	56	11	63	2477	18	NO	Alyc.aculy01g00895.1, Alyc.aculy01g06510.1, Alyc.aculy01g12340.1, Alyc.aculy01g15780.1, Alyc.aculy02g02330.1, Alyc.aculy02g04400.1, Alyc.aculy02g12850.1, Alyc.aculy03g06800.1, Alyc.aculy03g09230.1, Alyc.aculy04g06580.1, Alyc.aculy04g08460.1	Agam.AGAP001308-RA, Agam.AGAP004242-RA, Agam.AGAP004675-RB, Agam.AGAP005936-RA	Bmor.transcript_BGIBMGA000019-RA, Bmor.transcript_BGIBMGA000195-RA, Bmor.transcript_BGIBMGA000676-RA, Bmor.transcript_BGIBMGA002421-RA, Bmor.transcript_BGIBMGA003710-RA, Bmor.transcript_BGIBMGA005385-RA, Bmor.transcript_BGIBMGA006130-RA, Bmor.transcript_BGIBMGA006546-RA, Bmor.transcript_BGIBMGA007574-RA, Bmor.transcript_BGIBMGA007578-RA, Bmor.transcript_BGIBMGA008065-RA, Bmor.transcript_BGIBMGA00…	Cele.Transcript_F47D12.1c, Cele.Transcript_T20G5.9, Cele.Transcript_Y71F9B.2a	Cscu.CSCU000130-RA, Cscu.CSCU000309-RA, Cscu.CSCU000324-RA, Cscu.CSCU000348-RA, Cscu.CSCU000369-RA, Cscu.CSCU000689-RA, Cscu.CSCU000786-RA, Cscu.CSCU000974-RA, Cscu.CSCU000991-RA, Cscu.CSCU001022-RA, Cscu.CSCU001078-RA, Cscu.CSCU001208-RA, Cscu.CSCU001227-RA, Cscu.CSCU001344-RA, Cscu.CSCU001365-RA, Cscu.CSCU001420-RA, Cscu.CSCU001678-RA, Cscu.CSCU001707-RA, Cscu.CSCU001817-RA, Cscu.CSCU002029-RA,…	Drer.transcript_ENSDART00000067668, Drer.transcript_ENSDART00000074268, Drer.transcript_ENSDART00000075588, Drer.transcript_ENSDART00000108856, Drer.transcript_ENSDART00000115036, Drer.transcript_ENSDART00000125709, Drer.transcript_ENSDART00000159462, Drer.transcript_ENSDART00000163477, Drer.transcript_ENSDART00000165454, Drer.transcript_ENSDART00000167552, Drer.transcript_ENSDART00000171539		Dpul.mRNA14982, Dpul.mRNA1501, Dpul.mRNA2460, Dpul.mRNA2619, Dpul.mRNA5151, Dpul.mRNA8394, Dpul.mRNA8395, Dpul.mRNA869, Dpul.mRNA9364	Dpte.g10079.t1, Dpte.g10395.t1, Dpte.g11354.t1, Dpte.g11470.t1, Dpte.g11781.t1, Dpte.g11845.t1, Dpte.g4211.t1, Dpte.g6738.t1, Dpte.g7940.t1, Dpte.g8017.t1, Dpte.g8262.t1, Dpte.g9575.t1	Dmel.FBtr0072233, Dmel.FBtr0075758, Dmel.FBtr0081789, Dmel.FBtr0082287, Dmel.FBtr0082998, Dmel.FBtr0345417	Hsap.transcript_ENST00000263795, Hsap.transcript_ENST00000397558, Hsap.transcript_ENST00000408946, Hsap.transcript_ENST00000444133, Hsap.transcript_ENST00000572449	Isca.ISCW005119-RA, Isca.ISCW006288-RA, Isca.ISCW006746-RA, Isca.ISCW007415-RA, Isca.ISCW010339-RA, Isca.ISCW011124-RA, Isca.ISCW012357-RA, Isca.ISCW012358-RA, Isca.ISCW012587-RA, Isca.ISCW013087-RA, Isca.ISCW014424-RA, Isca.ISCW014546-RA, Isca.ISCW015747-RA, Isca.ISCW017963-RA, Isca.ISCW018140-RA, Isca.ISCW019370-RA, Isca.ISCW019371-RA, Isca.ISCW019372-RA, Isca.ISCW019373-RA, Isca.ISCW019375-RA,…	Lpol.rna11313, Lpol.rna12049, Lpol.rna12878, Lpol.rna12999, Lpol.rna15081, Lpol.rna16240, Lpol.rna17980, Lpol.rna19032, Lpol.rna19210, Lpol.rna19654, Lpol.rna20109, Lpol.rna20363, Lpol.rna21451, Lpol.rna22795, Lpol.rna23741, Lpol.rna24228, Lpol.rna24448, Lpol.rna40, Lpol.rna4014, Lpol.rna4380, Lpol.rna596, Lpol.rna598, Lpol.rna8809, Lpol.rna9231, Lpol.rna9437, Lpol.rna9542, Lpol.rna9543	Mocc.rna1042, Mocc.rna1046, Mocc.rna11631, Mocc.rna11760, Mocc.rna11967, Mocc.rna12547, Mocc.rna13567, Mocc.rna14329, Mocc.rna16431, Mocc.rna16510, Mocc.rna1711, Mocc.rna17583, Mocc.rna17748, Mocc.rna18167, Mocc.rna18678, Mocc.rna2037, Mocc.rna2208, Mocc.rna2301, Mocc.rna2918, Mocc.rna3752, Mocc.rna4512, Mocc.rna4626, Mocc.rna5092, Mocc.rna5541, Mocc.rna574, Mocc.rna631, Mocc.rna6853, Mocc.rna752…	Ptep.aug3.g10052.t1, Ptep.aug3.g10075.t1, Ptep.aug3.g10085.t1, Ptep.aug3.g10097.t1, Ptep.aug3.g101.t1, Ptep.aug3.g10100.t1, Ptep.aug3.g10117.t1, Ptep.aug3.g10120.t1, Ptep.aug3.g10121.t1, Ptep.aug3.g10130.t1, Ptep.aug3.g10138.t1, Ptep.aug3.g10145.t1, Ptep.aug3.g10157.t1, Ptep.aug3.g10160.t1, Ptep.aug3.g10163.t1, Ptep.aug3.g10164.t1, Ptep.aug3.g10165.t1, Ptep.aug3.g10174.t1, Ptep.aug3.g10189.t1, Pt…	Ptep.aug3.5107.t1, Ptep.aug3.g5119.t1, Ptep.aug3.g5123.t1, Ptep.aug3.g5133.t1, Ptep.aug3.g5137.t1, Ptep.aug3.g5152.t1, Ptep.aug3.g5203.t1, Ptep.aug3.g5207.t1, Ptep.aug3.g5243.t1, Ptep.aug3.g5276.t1, Ptep.aug3.g5277.t1, Ptep.aug3.g5281.t1, Ptep.aug3.g5284.t1, Ptep.aug3.g5286.t1, Ptep.aug3.g5298.t1, Ptep.aug3.g53.t1, Ptep.aug3.g5304.t1, Ptep.aug3.g5326.t1, Ptep.aug3.g534.t1, Ptep.aug3.g5368.t1, Pte…	Phum.transcript_PHUM258310-RA, Phum.transcript_PHUM311000-RA, Phum.transcript_PHUM327740-RA, Phum.transcript_PHUM412420-RA, Phum.transcript_PHUM587760-RA	Smar.transcript_SMAR000094-RA, Smar.transcript_SMAR000267-RA, Smar.transcript_SMAR000480-RA, Smar.transcript_SMAR000734-RA, Smar.transcript_SMAR000942-RA, Smar.transcript_SMAR001023-RA, Smar.transcript_SMAR001161-RA, Smar.transcript_SMAR001345-RA, Smar.transcript_SMAR001383-RA, Smar.transcript_SMAR001393-RA, Smar.transcript_SMAR001685-RA, Smar.transcript_SMAR001722-RA, Smar.transcript_SMAR002008-…	Turt.mRNA_tetur02g02000, Turt.mRNA_tetur03g91931, Turt.mRNA_tetur04g92280, Turt.mRNA_tetur05g07190, Turt.mRNA_tetur06g05180, Turt.mRNA_tetur08g08522, Turt.mRNA_tetur12g00380, Turt.mRNA_tetur29g01330, Turt.mRNA_tetur29g01350, Turt.mRNA_tetur29g01370, Turt.mRNA_tetur50g00010	Tcas.transcript_TC000005_001, Tcas.transcript_TC000006_001, Tcas.transcript_TC000717_001, Tcas.transcript_TC001732_001, Tcas.transcript_TC001785_001, Tcas.transcript_TC001915_001, Tcas.transcript_TC001924_001, Tcas.transcript_TC001948_001, Tcas.transcript_TC002152_001, Tcas.transcript_TC002153_001, Tcas.transcript_TC002157_001, Tcas.transcript_TC002176_001, Tcas.transcript_TC002225_001, Tcas.tran…
OG0000002	IPR000477;IPR001584	Domain Reverse transcriptase domain;Domain Integrase, catalytic core	NA	NA	NA		0	1	13	4	160	5	0	40	0	2	45	22	504	324	2	43	1	112	1278	15	NO		Agam.AGAP028507-RA	Bmor.transcript_BGIBMGA001749-RA, Bmor.transcript_BGIBMGA002022-RA, Bmor.transcript_BGIBMGA004024-RA, Bmor.transcript_BGIBMGA004086-RA, Bmor.transcript_BGIBMGA005890-RA, Bmor.transcript_BGIBMGA006890-RA, Bmor.transcript_BGIBMGA007385-RA, Bmor.transcript_BGIBMGA008083-RA, Bmor.transcript_BGIBMGA008578-RA, Bmor.transcript_BGIBMGA008754-RA, Bmor.transcript_BGIBMGA010534-RA, Bmor.transcript_BGIBMGA01…	Cele.Transcript_K03D7.8, Cele.Transcript_K04G7.1.1, Cele.Transcript_Y105C5B.1, Cele.Transcript_Y38H6C.21	Cscu.CSCU000247-RA, Cscu.CSCU000638-RA, Cscu.CSCU000969-RA, Cscu.CSCU000970-RA, Cscu.CSCU001065-RA, Cscu.CSCU001066-RA, Cscu.CSCU001199-RA, Cscu.CSCU001963-RA, Cscu.CSCU002185-RA, Cscu.CSCU002392-RA, Cscu.CSCU002395-RA, Cscu.CSCU002396-RA, Cscu.CSCU002397-RA, Cscu.CSCU002450-RA, Cscu.CSCU002454-RA, Cscu.CSCU002628-RA, Cscu.CSCU002696-RA, Cscu.CSCU002755-RA, Cscu.CSCU002756-RA, Cscu.CSCU002960-RA,…	Drer.transcript_ENSDART00000122176, Drer.transcript_ENSDART00000159655, Drer.transcript_ENSDART00000166396, Drer.transcript_ENSDART00000167442, Drer.transcript_ENSDART00000170072			Dpte.g10348.t1, Dpte.g10654.t1, Dpte.g11161.t1, Dpte.g11385.t1, Dpte.g11631.t1, Dpte.g11780.t1, Dpte.g11809.t1, Dpte.g11862.t1, Dpte.g12024.t1, Dpte.g12062.t1, Dpte.g12078.t1, Dpte.g12090.t1, Dpte.g12104.t1, Dpte.g12130.t1, Dpte.g12138.t1, Dpte.g12176.t1, Dpte.g12177.t1, Dpte.g12190.t1, Dpte.g12220.t1, Dpte.g12326.t1, Dpte.g12342.t1, Dpte.g12397.t1, Dpte.g12454.t1, Dpte.g12464.t1, Dpte.g12514.t1,…		Hsap.transcript_ENST00000399004, Hsap.transcript_ENST00000534062	Isca.ISCW000844-RA, Isca.ISCW000935-RA, Isca.ISCW001690-RA, Isca.ISCW003194-RA, Isca.ISCW003363-RA, Isca.ISCW003799-RA, Isca.ISCW003962-RA, Isca.ISCW004467-RA, Isca.ISCW004760-RA, Isca.ISCW006023-RA, Isca.ISCW006585-RA, Isca.ISCW006731-RA, Isca.ISCW007059-RA, Isca.ISCW007274-RA, Isca.ISCW007292-RA, Isca.ISCW007443-RA, Isca.ISCW007811-RA, Isca.ISCW009546-RA, Isca.ISCW009974-RA, Isca.ISCW010774-RA,…	Lpol.rna10032, Lpol.rna12242, Lpol.rna124, Lpol.rna12592, Lpol.rna14519, Lpol.rna16490, Lpol.rna17633, Lpol.rna18948, Lpol.rna19217, Lpol.rna19377, Lpol.rna21066, Lpol.rna22187, Lpol.rna23849, Lpol.rna24994, Lpol.rna25126, Lpol.rna4041, Lpol.rna4367, Lpol.rna6332, Lpol.rna6533, Lpol.rna6696, Lpol.rna759, Lpol.rna8875	Mocc.rna10031, Mocc.rna10035, Mocc.rna10065, Mocc.rna10067, Mocc.rna10068, Mocc.rna10080, Mocc.rna10087, Mocc.rna10088, Mocc.rna10147, Mocc.rna10156, Mocc.rna10161, Mocc.rna10163, Mocc.rna10216, Mocc.rna10217, Mocc.rna10312, Mocc.rna1036, Mocc.rna10434, Mocc.rna10500, Mocc.rna10501, Mocc.rna1051, Mocc.rna10523, Mocc.rna10832, Mocc.rna11025, Mocc.rna11035, Mocc.rna1106, Mocc.rna1108, Mocc.rna11442…	Ptep.aug3.g10179.t1, Ptep.aug3.g10193.t1, Ptep.aug3.g10391.t1, Ptep.aug3.g10466.t1, Ptep.aug3.g10467.t1, Ptep.aug3.g1053.t1, Ptep.aug3.g10561.t1, Ptep.aug3.g1057.t1, Ptep.aug3.g10670.t1, Ptep.aug3.g10688.t1, Ptep.aug3.g10842.t1, Ptep.aug3.g10957.t1, Ptep.aug3.g11073.t1, Ptep.aug3.g11109.t1, Ptep.aug3.g11166.t1, Ptep.aug3.g11251.t1, Ptep.aug3.g11344.t1, Ptep.aug3.g11600.t1, Ptep.aug3.g11786.t1, Pt…		Phum.transcript_PHUM531970-RA, Phum.transcript_PHUM531990-RA	Smar.transcript_SMAR000035-RA, Smar.transcript_SMAR000050-RA, Smar.transcript_SMAR000743-RA, Smar.transcript_SMAR000973-RA, Smar.transcript_SMAR001074-RA, Smar.transcript_SMAR001075-RA, Smar.transcript_SMAR001210-RA, Smar.transcript_SMAR001311-RA, Smar.transcript_SMAR001396-RA, Smar.transcript_SMAR001397-RA, Smar.transcript_SMAR001488-RA, Smar.transcript_SMAR002033-RA, Smar.transcript_SMAR002343-…	Turt.mRNA_tetur39g00831	Tcas.transcript_TC001405_001, Tcas.transcript_TC001428_001, Tcas.transcript_TC001491_001, Tcas.transcript_TC001689_001, Tcas.transcript_TC001792_001, Tcas.transcript_TC001821_001, Tcas.transcript_TC001912_001, Tcas.transcript_TC002008_001, Tcas.transcript_TC002266_001, Tcas.transcript_TC002267_001, Tcas.transcript_TC002321_001, Tcas.transcript_TC002322_001, Tcas.transcript_TC002383_001, Tcas.tran…
OG0000003	IPR001356	Domain Homeobox domain	GO:0007400 ( neuroblast fate determination ), GO:0000981 ( RNA polymerase II transcription factor activity, sequence-specific DNA binding ), GO:0000122 ( negative regulation of transcription from RNA polymerase II promoter ), GO:0007419 ( ventral cord development ), GO:0009953 ( dorsal/ventral pattern formation ), GO:0043565 ( sequence-specific DNA binding ), GO:0007398 ( ectoderm development ), …	contraction	contraction		29	39	54	32	77	121	34	33	43	93	52	102	33	56	40	51	48	43	980	18	NO	Alyc.aculy01g03220.1, Alyc.aculy01g04760.1, Alyc.aculy01g05690.1, Alyc.aculy01g06790.1, Alyc.aculy01g16990.1, Alyc.aculy01g17870.1, Alyc.aculy01g24110.1, Alyc.aculy01g25910.1, Alyc.aculy01g30540.1, Alyc.aculy01g34650.1, Alyc.aculy01g34700.1, Alyc.aculy01g34710.1, Alyc.aculy01g34720.1, Alyc.aculy01g34740.1, Alyc.aculy01g34760.1, Alyc.aculy01g35740.1, Alyc.aculy01g38220.1, Alyc.aculy01g39110.1, Aly…	Agam.AGAP000484-RA, Agam.AGAP000488-RA, Agam.AGAP001389-RA, Agam.AGAP001560-RA, Agam.AGAP001618-RA, Agam.AGAP001619-RA, Agam.AGAP002372-RA, Agam.AGAP003406-RA, Agam.AGAP003669-RA, Agam.AGAP003670-RA, Agam.AGAP003671-RA, Agam.AGAP003672-RA, Agam.AGAP003674-RA, Agam.AGAP004646-RA, Agam.AGAP004647-RA, Agam.AGAP004648-RA, Agam.AGAP004649-RA, Agam.AGAP004659-RA, Agam.AGAP004660-RA, Agam.AGAP004661-RA,…	Bmor.transcript_BGIBMGA000761-RA, Bmor.transcript_BGIBMGA000762-RA, Bmor.transcript_BGIBMGA001179-RA, Bmor.transcript_BGIBMGA001180-RA, Bmor.transcript_BGIBMGA003233-RA, Bmor.transcript_BGIBMGA003265-RA, Bmor.transcript_BGIBMGA003811-RA, Bmor.transcript_BGIBMGA005045-RA, Bmor.transcript_BGIBMGA006384-RA, Bmor.transcript_BGIBMGA006385-RA, Bmor.transcript_BGIBMGA006388-RA, Bmor.transcript_BGIBMGA00…	Cele.Transcript_C02F12.10a, Cele.Transcript_C07H6.7.1, Cele.Transcript_C08C3.1b, Cele.Transcript_C08C3.3, Cele.Transcript_C13G5.1.1, Cele.Transcript_C16C2.1, Cele.Transcript_C18B12.3, Cele.Transcript_C27A12.5, Cele.Transcript_C28A5.4b, Cele.Transcript_C33D12.1, Cele.Transcript_C33D12.7.1, Cele.Transcript_C34C6.8, Cele.Transcript_C38D4.6a.1, Cele.Transcript_C39E6.4, Cele.Transcript_F16H11.4, Cele.…	Cscu.CSCU000715-RA, Cscu.CSCU001125-RA, Cscu.CSCU001126-RA, Cscu.CSCU002540-RA, Cscu.CSCU004046-RA, Cscu.CSCU004047-RA, Cscu.CSCU004049-RA, Cscu.CSCU004419-RA, Cscu.CSCU004421-RA, Cscu.CSCU004422-RA, Cscu.CSCU004754-RA, Cscu.CSCU005125-RA, Cscu.CSCU005126-RA, Cscu.CSCU005132-RA, Cscu.CSCU005342-RA, Cscu.CSCU005343-RA, Cscu.CSCU005346-RA, Cscu.CSCU005348-RA, Cscu.CSCU005351-RA, Cscu.CSCU005352-RA,…	Drer.transcript_ENSDART00000002232, Drer.transcript_ENSDART00000004548, Drer.transcript_ENSDART00000006043, Drer.transcript_ENSDART00000006393, Drer.transcript_ENSDART00000006479, Drer.transcript_ENSDART00000007073, Drer.transcript_ENSDART00000007770, Drer.transcript_ENSDART00000008468, Drer.transcript_ENSDART00000008469, Drer.transcript_ENSDART00000009827, Drer.transcript_ENSDART00000011520, Dre…		Dpul.mRNA10265, Dpul.mRNA12144, Dpul.mRNA12147, Dpul.mRNA14073, Dpul.mRNA14206, Dpul.mRNA14528, Dpul.mRNA14880, Dpul.mRNA16080, Dpul.mRNA16959, Dpul.mRNA2701, Dpul.mRNA2778, Dpul.mRNA2800, Dpul.mRNA3415, Dpul.mRNA40, Dpul.mRNA6785, Dpul.mRNA6833, Dpul.mRNA7375, Dpul.mRNA7795, Dpul.mRNA7801, Dpul.mRNA8174, Dpul.mRNA8842, Dpul.mRNA8843, Dpul.mRNA8847, Dpul.mRNA8848, Dpul.mRNA9499, Dpul.mRNA9514, Dp…	Dpte.g10086.t1, Dpte.g10087.t1, Dpte.g10088.t1, Dpte.g10106.t1, Dpte.g1032.t1, Dpte.g11014.t1, Dpte.g11043.t1, Dpte.g11044.t1, Dpte.g11368.t1, Dpte.g11369.t1, Dpte.g11536.t1, Dpte.g11737.t1, Dpte.g11863.t1, Dpte.g11933.t1, Dpte.g11944.t1, Dpte.g1357.t1, Dpte.g3309.t1, Dpte.g3658.t1, Dpte.g4133.t1, Dpte.g4135.t1, Dpte.g4324.t1, Dpte.g564.t1, Dpte.g6193.t1, Dpte.g688.t1, Dpte.g6905.t1, Dpte.g7920.t…	Dmel.FBtr0070110, Dmel.FBtr0073656, Dmel.FBtr0074429, Dmel.FBtr0074430, Dmel.FBtr0076751, Dmel.FBtr0081621, Dmel.FBtr0081625, Dmel.FBtr0081652, Dmel.FBtr0081658, Dmel.FBtr0081670, Dmel.FBtr0081671, Dmel.FBtr0081696, Dmel.FBtr0082863, Dmel.FBtr0082880, Dmel.FBtr0083347, Dmel.FBtr0083388, Dmel.FBtr0083571, Dmel.FBtr0083968, Dmel.FBtr0084037, Dmel.FBtr0084086, Dmel.FBtr0084087, Dmel.FBtr0084091, Dme…	Hsap.transcript_ENST00000006015, Hsap.transcript_ENST00000040584, Hsap.transcript_ENST00000217999, Hsap.transcript_ENST00000222598, Hsap.transcript_ENST00000222718, Hsap.transcript_ENST00000222726, Hsap.transcript_ENST00000222728, Hsap.transcript_ENST00000225648, Hsap.transcript_ENST00000229307, Hsap.transcript_ENST00000231656, Hsap.transcript_ENST00000233638, Hsap.transcript_ENST00000234198, Hsa…	Isca.ISCW000973-RA, Isca.ISCW001024-RA, Isca.ISCW001025-RA, Isca.ISCW002094-RA, Isca.ISCW002346-RA, Isca.ISCW002347-RA, Isca.ISCW004556-RA, Isca.ISCW005223-RA, Isca.ISCW005275-RA, Isca.ISCW005496-RA, Isca.ISCW005966-RA, Isca.ISCW008247-RA, Isca.ISCW008920-RA, Isca.ISCW008954-RA, Isca.ISCW011755-RA, Isca.ISCW012144-RA, Isca.ISCW012145-RA, Isca.ISCW012461-RA, Isca.ISCW012498-RA, Isca.ISCW014989-RA,…	Lpol.rna1093, Lpol.rna11023, Lpol.rna12004, Lpol.rna12005, Lpol.rna13253, Lpol.rna13351, Lpol.rna14255, Lpol.rna14647, Lpol.rna14807, Lpol.rna14809, Lpol.rna14997, Lpol.rna14998, Lpol.rna15060, Lpol.rna15400, Lpol.rna15440, Lpol.rna15492, Lpol.rna15782, Lpol.rna15801, Lpol.rna15918, Lpol.rna16213, Lpol.rna16864, Lpol.rna16875, Lpol.rna17522, Lpol.rna17731, Lpol.rna17770, Lpol.rna17833, Lpol.rna17…	Mocc.rna10497, Mocc.rna10607, Mocc.rna11139, Mocc.rna11141, Mocc.rna11777, Mocc.rna12209, Mocc.rna12305, Mocc.rna12542, Mocc.rna12612, Mocc.rna12823, Mocc.rna13366, Mocc.rna13639, Mocc.rna15787, Mocc.rna17060, Mocc.rna17061, Mocc.rna17483, Mocc.rna17631, Mocc.rna17679, Mocc.rna18, Mocc.rna18063, Mocc.rna18266, Mocc.rna18271, Mocc.rna18657, Mocc.rna194, Mocc.rna4149, Mocc.rna7058, Mocc.rna712, Moc…	Ptep.aug3.g10147.t1, Ptep.aug3.g1062.t1, Ptep.aug3.g11040.t1, Ptep.aug3.g1145.t2, Ptep.aug3.g12478.t2, Ptep.aug3.g12643.t1, Ptep.aug3.g14024.t1, Ptep.aug3.g1423.t1, Ptep.aug3.g15189.t1, Ptep.aug3.g15243.t1, Ptep.aug3.g15531.t1, Ptep.aug3.g15595.t1, Ptep.aug3.g15600.t1, Ptep.aug3.g15606.t1, Ptep.aug3.g15608.t1, Ptep.aug3.g15951.t1, Ptep.aug3.g15983.t1, Ptep.aug3.g16867.t1, Ptep.aug3.g17585.t1, Pte…		Phum.transcript_PHUM030020-RA, Phum.transcript_PHUM030230-RA, Phum.transcript_PHUM030340-RA, Phum.transcript_PHUM031280-RA, Phum.transcript_PHUM034630-RA, Phum.transcript_PHUM035300-RA, Phum.transcript_PHUM050850-RA, Phum.transcript_PHUM055900-RA, Phum.transcript_PHUM118950-RA, Phum.transcript_PHUM205160-RA, Phum.transcript_PHUM210980-RA, Phum.transcript_PHUM219670-RA, Phum.transcript_PHUM235910-…	Smar.transcript_SMAR000779-RA, Smar.transcript_SMAR001128-RA, Smar.transcript_SMAR002713-RA, Smar.transcript_SMAR002790-RA, Smar.transcript_SMAR003378-RA, Smar.transcript_SMAR003413-RA, Smar.transcript_SMAR003755-RA, Smar.transcript_SMAR004159-RA, Smar.transcript_SMAR004160-RA, Smar.transcript_SMAR004162-RA, Smar.transcript_SMAR004163-RA, Smar.transcript_SMAR004164-RA, Smar.transcript_SMAR004167-…	Turt.mRNA_tetur01g01560, Turt.mRNA_tetur01g02760, Turt.mRNA_tetur01g02770, Turt.mRNA_tetur01g02800, Turt.mRNA_tetur01g06070, Turt.mRNA_tetur01g07680, Turt.mRNA_tetur01g13830, Turt.mRNA_tetur01g13840, Turt.mRNA_tetur01g15290, Turt.mRNA_tetur02g08870, Turt.mRNA_tetur02g09110, Turt.mRNA_tetur02g09640, Turt.mRNA_tetur02g11920, Turt.mRNA_tetur02g13510, Turt.mRNA_tetur02g13520, Turt.mRNA_tetur02g13540,…	Tcas.transcript_TC000424_001, Tcas.transcript_TC000483_001, Tcas.transcript_TC000889_002, Tcas.transcript_TC000894_001, Tcas.transcript_TC000903_001, Tcas.transcript_TC000912_001, Tcas.transcript_TC000916_001, Tcas.transcript_TC000917_001, Tcas.transcript_TC000920_001, Tcas.transcript_TC000921_001, Tcas.transcript_TC000922_001, Tcas.transcript_TC000925_001, Tcas.transcript_TC000926_001, Tcas.tran…
OG0000004	IPR000477	Domain Reverse transcriptase domain	NA	NA	NA		0	0	8	1	274	52	3	27	0	0	44	15	173	212	7	14	2	140	972	14	NO			Bmor.transcript_BGIBMGA000196-RA, Bmor.transcript_BGIBMGA008691-RA, Bmor.transcript_BGIBMGA009553-RA, Bmor.transcript_BGIBMGA011494-RA, Bmor.transcript_BGIBMGA012696-RA, Bmor.transcript_BGIBMGA013207-RA, Bmor.transcript_BGIBMGA013961-RA, Bmor.transcript_BGIBMGA014535-RA	Cele.Transcript_H25P06.5	Cscu.CSCU000446-RA, Cscu.CSCU000738-RA, Cscu.CSCU001083-RA, Cscu.CSCU001359-RA, Cscu.CSCU001494-RA, Cscu.CSCU001854-RA, Cscu.CSCU002154-RA, Cscu.CSCU002159-RA, Cscu.CSCU002610-RA, Cscu.CSCU002759-RA, Cscu.CSCU002781-RA, Cscu.CSCU002782-RA, Cscu.CSCU002981-RA, Cscu.CSCU003214-RA, Cscu.CSCU003225-RA, Cscu.CSCU003281-RA, Cscu.CSCU003282-RA, Cscu.CSCU003376-RA, Cscu.CSCU003377-RA, Cscu.CSCU003394-RA,…	Drer.transcript_ENSDART00000126929, Drer.transcript_ENSDART00000127401, Drer.transcript_ENSDART00000129389, Drer.transcript_ENSDART00000130167, Drer.transcript_ENSDART00000130921, Drer.transcript_ENSDART00000152965, Drer.transcript_ENSDART00000154885, Drer.transcript_ENSDART00000157431, Drer.transcript_ENSDART00000157747, Drer.transcript_ENSDART00000157794, Drer.transcript_ENSDART00000157944, Dre…		Dpul.mRNA14691, Dpul.mRNA15211, Dpul.mRNA5513	Dpte.g10124.t1, Dpte.g10380.t1, Dpte.g11100.t1, Dpte.g11540.t1, Dpte.g11579.t1, Dpte.g11880.t1, Dpte.g12001.t1, Dpte.g12233.t1, Dpte.g12331.t1, Dpte.g3214.t1, Dpte.g3742.t1, Dpte.g3787.t1, Dpte.g3788.t1, Dpte.g5069.t1, Dpte.g5207.t1, Dpte.g559.t1, Dpte.g5948.t1, Dpte.g5957.t1, Dpte.g6311.t1, Dpte.g7231.t1, Dpte.g7777.t1, Dpte.g8159.t1, Dpte.g8358.t1, Dpte.g8464.t1, Dpte.g8632.t1, Dpte.g9165.t1, D…			Isca.ISCW000743-RA, Isca.ISCW001163-RA, Isca.ISCW001737-RA, Isca.ISCW001778-RA, Isca.ISCW002019-RA, Isca.ISCW002812-RA, Isca.ISCW003653-RA, Isca.ISCW003678-RA, Isca.ISCW004263-RA, Isca.ISCW004370-RA, Isca.ISCW007356-RA, Isca.ISCW007397-RA, Isca.ISCW008231-RA, Isca.ISCW008449-RA, Isca.ISCW008586-RA, Isca.ISCW009017-RA, Isca.ISCW009221-RA, Isca.ISCW009806-RA, Isca.ISCW009987-RA, Isca.ISCW010497-RA,…	Lpol.rna12847, Lpol.rna14645, Lpol.rna16877, Lpol.rna18492, Lpol.rna19832, Lpol.rna21013, Lpol.rna22656, Lpol.rna25144, Lpol.rna25170, Lpol.rna25208, Lpol.rna25214, Lpol.rna25298, Lpol.rna5329, Lpol.rna615, Lpol.rna8923	Mocc.rna10059, Mocc.rna10152, Mocc.rna10154, Mocc.rna10213, Mocc.rna1041, Mocc.rna10836, Mocc.rna10887, Mocc.rna11023, Mocc.rna11209, Mocc.rna11368, Mocc.rna11399, Mocc.rna11438, Mocc.rna11440, Mocc.rna11586, Mocc.rna11623, Mocc.rna11765, Mocc.rna12316, Mocc.rna1257, Mocc.rna12870, Mocc.rna129, Mocc.rna13085, Mocc.rna13096, Mocc.rna13464, Mocc.rna14495, Mocc.rna14988, Mocc.rna1550, Mocc.rna1560, …	Ptep.aug3.g10172.t1, Ptep.aug3.g10469.t1, Ptep.aug3.g10963.t1, Ptep.aug3.g11014.t1, Ptep.aug3.g11027.t1, Ptep.aug3.g11034.t1, Ptep.aug3.g11156.t1, Ptep.aug3.g11221.t1, Ptep.aug3.g11249.t1, Ptep.aug3.g11294.t1, Ptep.aug3.g11458.t1, Ptep.aug3.g1150.t1, Ptep.aug3.g1152.t1, Ptep.aug3.g1159.t1, Ptep.aug3.g11970.t1, Ptep.aug3.g11999.t1, Ptep.aug3.g120.t1, Ptep.aug3.g12003.t1, Ptep.aug3.g12046.t1, Ptep.…		Phum.transcript_PHUM026290-RA, Phum.transcript_PHUM134590-RA, Phum.transcript_PHUM146610-RA, Phum.transcript_PHUM163690-RA, Phum.transcript_PHUM403740-RA, Phum.transcript_PHUM494390-RA, Phum.transcript_PHUM537760-RA	Smar.transcript_SMAR000455-RA, Smar.transcript_SMAR001704-RA, Smar.transcript_SMAR001948-RA, Smar.transcript_SMAR002576-RA, Smar.transcript_SMAR003534-RA, Smar.transcript_SMAR004906-RA, Smar.transcript_SMAR006612-RA, Smar.transcript_SMAR009388-RA, Smar.transcript_SMAR010326-RA, Smar.transcript_SMAR011364-RA, Smar.transcript_SMAR012072-RA, Smar.transcript_SMAR012569-RA, Smar.transcript_SMAR013422-…	Turt.mRNA_tetur05g08800, Turt.mRNA_tetur11g90977	Tcas.transcript_TC001645_001, Tcas.transcript_TC001664_001, Tcas.transcript_TC001892_001, Tcas.transcript_TC001905_001, Tcas.transcript_TC001991_001, Tcas.transcript_TC001995_001, Tcas.transcript_TC002013_001, Tcas.transcript_TC002017_001, Tcas.transcript_TC002027_001, Tcas.transcript_TC002031_001, Tcas.transcript_TC002033_001, Tcas.transcript_TC002103_001, Tcas.transcript_TC002104_001, Tcas.tran…
OG0000005	IPR001254	Domain Serine proteases, trypsin domain	GO:0006508 ( proteolysis ), GO:0004252 ( serine-type endopeptidase activity ), GO:0006508 ( proteolysis ), GO:0004252 ( serine-type endopeptidase activity ), GO:0004252 ( serine-type endopeptidase activity ), GO:0006508 ( proteolysis ), GO:0004252 ( serine-type endopeptidase activity ), GO:0006508 ( proteolysis ), GO:2000331 ( regulation of terminal button organization ), GO:0004252 ( serine-type…	contraction	contraction		18	99	51	4	47	98	73	19	117	78	39	42	40	40	29	33	30	38	895	18	NO	Alyc.aculy01g07830.1, Alyc.aculy01g13360.1, Alyc.aculy01g35230.1, Alyc.aculy01g37250.1, Alyc.aculy02g06140.1, Alyc.aculy02g14040.1, Alyc.aculy02g18870.1, Alyc.aculy02g21270.1, Alyc.aculy02g27820.1, Alyc.aculy02g27890.1, Alyc.aculy03g03120.1, Alyc.aculy03g04620.1, Alyc.aculy03g04640.1, Alyc.aculy03g11840.1, Alyc.aculy04g05620.1, Alyc.aculy05g01550.1, Alyc.aculy05g06490.1, Alyc.aculy05g07180.1	Agam.AGAP000411-RA, Agam.AGAP001198-RA, Agam.AGAP001241-RA, Agam.AGAP001244-RA, Agam.AGAP001245-RA, Agam.AGAP001246-RA, Agam.AGAP001247-RA, Agam.AGAP001248-RA, Agam.AGAP001249-RA, Agam.AGAP001250-RA, Agam.AGAP001251-RA, Agam.AGAP001252-RA, Agam.AGAP001365-RA, Agam.AGAP001366-RA, Agam.AGAP001395-RA, Agam.AGAP001433-RA, Agam.AGAP001924-RA, Agam.AGAP002422-RA, Agam.AGAP002543-RA, Agam.AGAP002784-RA,…	Bmor.transcript_BGIBMGA000840-RA, Bmor.transcript_BGIBMGA000841-RA, Bmor.transcript_BGIBMGA003104-RA, Bmor.transcript_BGIBMGA003566-RA, Bmor.transcript_BGIBMGA003567-RA, Bmor.transcript_BGIBMGA003568-RA, Bmor.transcript_BGIBMGA003569-RA, Bmor.transcript_BGIBMGA003580-RA, Bmor.transcript_BGIBMGA003604-RA, Bmor.transcript_BGIBMGA005824-RA, Bmor.transcript_BGIBMGA006272-RA, Bmor.transcript_BGIBMGA00…	Cele.Transcript_C07G1.1, Cele.Transcript_C43G2.5a, Cele.Transcript_K07B1.1.1, Cele.Transcript_ZK546.15	Cscu.CSCU001789-RA, Cscu.CSCU001791-RA, Cscu.CSCU004158-RA, Cscu.CSCU007334-RA, Cscu.CSCU010362-RA, Cscu.CSCU010363-RA, Cscu.CSCU012622-RA, Cscu.CSCU013849-RA, Cscu.CSCU014214-RA, Cscu.CSCU014215-RA, Cscu.CSCU015136-RA, Cscu.CSCU016389-RA, Cscu.CSCU016972-RA, Cscu.CSCU016973-RA, Cscu.CSCU016974-RA, Cscu.CSCU016975-RA, Cscu.CSCU016976-RA, Cscu.CSCU017418-RA, Cscu.CSCU017502-RA, Cscu.CSCU017675-RA,…	Drer.transcript_ENSDART00000003716, Drer.transcript_ENSDART00000004240, Drer.transcript_ENSDART00000009028, Drer.transcript_ENSDART00000012659, Drer.transcript_ENSDART00000013209, Drer.transcript_ENSDART00000016249, Drer.transcript_ENSDART00000017179, Drer.transcript_ENSDART00000020921, Drer.transcript_ENSDART00000021594, Drer.transcript_ENSDART00000022139, Drer.transcript_ENSDART00000029262, Dre…		Dpul.mRNA10487, Dpul.mRNA10493, Dpul.mRNA10726, Dpul.mRNA11609, Dpul.mRNA11625, Dpul.mRNA11634, Dpul.mRNA11635, Dpul.mRNA11639, Dpul.mRNA11773, Dpul.mRNA11774, Dpul.mRNA11779, Dpul.mRNA11781, Dpul.mRNA1212, Dpul.mRNA12746, Dpul.mRNA12888, Dpul.mRNA13134, Dpul.mRNA13138, Dpul.mRNA13144, Dpul.mRNA13155, Dpul.mRNA13161, Dpul.mRNA13162, Dpul.mRNA13653, Dpul.mRNA13654, Dpul.mRNA13656, Dpul.mRNA13658, …	Dpte.g10011.t1, Dpte.g10681.t1, Dpte.g11229.t1, Dpte.g11712.t1, Dpte.g11830.t1, Dpte.g3169.t1, Dpte.g3632.t1, Dpte.g4090.t1, Dpte.g421.t1, Dpte.g5185.t1, Dpte.g5986.t1, Dpte.g63.t1, Dpte.g7092.t1, Dpte.g7100.t1, Dpte.g7628.t1, Dpte.g8052.t1, Dpte.g8364.t1, Dpte.g8399.t1, Dpte.g8859.t1	Dmel.FBtr0070257, Dmel.FBtr0070861, Dmel.FBtr0070862, Dmel.FBtr0070863, Dmel.FBtr0071695, Dmel.FBtr0071697, Dmel.FBtr0071720, Dmel.FBtr0071743, Dmel.FBtr0071744, Dmel.FBtr0071904, Dmel.FBtr0072380, Dmel.FBtr0073102, Dmel.FBtr0073104, Dmel.FBtr0073105, Dmel.FBtr0073214, Dmel.FBtr0073215, Dmel.FBtr0074321, Dmel.FBtr0074362, Dmel.FBtr0074363, Dmel.FBtr0074364, Dmel.FBtr0074945, Dmel.FBtr0075712, Dme…	Hsap.transcript_ENST00000005995, Hsap.transcript_ENST00000161006, Hsap.transcript_ENST00000211076, Hsap.transcript_ENST00000216139, Hsap.transcript_ENST00000218099, Hsap.transcript_ENST00000231009, Hsap.transcript_ENST00000233997, Hsap.transcript_ENST00000234347, Hsap.transcript_ENST00000234798, Hsap.transcript_ENST00000250351, Hsap.transcript_ENST00000253496, Hsap.transcript_ENST00000262626, Hsa…	Isca.ISCW001310-RA, Isca.ISCW001620-RA, Isca.ISCW002092-RA, Isca.ISCW002093-RA, Isca.ISCW002331-RA, Isca.ISCW002695-RA, Isca.ISCW002979-RA, Isca.ISCW002998-RA, Isca.ISCW002999-RA, Isca.ISCW003370-RA, Isca.ISCW004276-RA, Isca.ISCW004734-RA, Isca.ISCW004764-RA, Isca.ISCW004835-RA, Isca.ISCW006069-RA, Isca.ISCW006432-RA, Isca.ISCW006637-RA, Isca.ISCW006726-RA, Isca.ISCW007715-RA, Isca.ISCW009051-RA,…	Lpol.rna11150, Lpol.rna11999, Lpol.rna12000, Lpol.rna12001, Lpol.rna12097, Lpol.rna14413, Lpol.rna14939, Lpol.rna15596, Lpol.rna15684, Lpol.rna15709, Lpol.rna19029, Lpol.rna19932, Lpol.rna21259, Lpol.rna21973, Lpol.rna22134, Lpol.rna22203, Lpol.rna22351, Lpol.rna22943, Lpol.rna23043, Lpol.rna23502, Lpol.rna23803, Lpol.rna23896, Lpol.rna24070, Lpol.rna24101, Lpol.rna24127, Lpol.rna24131, Lpol.rna2…	Mocc.rna10222, Mocc.rna10995, Mocc.rna11004, Mocc.rna11447, Mocc.rna12080, Mocc.rna12140, Mocc.rna12141, Mocc.rna12151, Mocc.rna12328, Mocc.rna12467, Mocc.rna13852, Mocc.rna14024, Mocc.rna1452, Mocc.rna14750, Mocc.rna14919, Mocc.rna14940, Mocc.rna15055, Mocc.rna15469, Mocc.rna15955, Mocc.rna16416, Mocc.rna17332, Mocc.rna2401, Mocc.rna3582, Mocc.rna4840, Mocc.rna5089, Mocc.rna51, Mocc.rna52, Mocc.…	Ptep.aug3.g1018.t2, Ptep.aug3.g10268.t1, Ptep.aug3.g11506.t1, Ptep.aug3.g11508.t1, Ptep.aug3.g11509.t1, Ptep.aug3.g1175.t1, Ptep.aug3.g12644.t2, Ptep.aug3.g12645.t1, Ptep.aug3.g12646.t1, Ptep.aug3.g12647.t1, Ptep.aug3.g13156.t1, Ptep.aug3.g13157.t1, Ptep.aug3.g13160.t1, Ptep.aug3.g14151.t1, Ptep.aug3.g14454.t1, Ptep.aug3.g14455.t1, Ptep.aug3.g14456.t2, Ptep.aug3.g1483.t1, Ptep.aug3.g15440.t1, Pte…		Phum.transcript_PHUM004590-RA, Phum.transcript_PHUM027570-RA, Phum.transcript_PHUM058260-RA, Phum.transcript_PHUM153300-RA, Phum.transcript_PHUM153320-RA, Phum.transcript_PHUM153430-RA, Phum.transcript_PHUM153440-RA, Phum.transcript_PHUM153450-RA, Phum.transcript_PHUM268620-RA, Phum.transcript_PHUM329900-RA, Phum.transcript_PHUM360690-RA, Phum.transcript_PHUM374530-RA, Phum.transcript_PHUM374840-…	Smar.transcript_SMAR000900-RA, Smar.transcript_SMAR000952-RA, Smar.transcript_SMAR004269-RA, Smar.transcript_SMAR004270-RA, Smar.transcript_SMAR004271-RA, Smar.transcript_SMAR004877-RA, Smar.transcript_SMAR004964-RA, Smar.transcript_SMAR004968-RA, Smar.transcript_SMAR005050-RA, Smar.transcript_SMAR005278-RA, Smar.transcript_SMAR005534-RA, Smar.transcript_SMAR005776-RA, Smar.transcript_SMAR006247-…	Turt.mRNA_tetur01g04580, Turt.mRNA_tetur01g06800, Turt.mRNA_tetur01g08540, Turt.mRNA_tetur02g01640, Turt.mRNA_tetur02g03090, Turt.mRNA_tetur02g06940, Turt.mRNA_tetur02g15165, Turt.mRNA_tetur03g09380, Turt.mRNA_tetur03g09590, Turt.mRNA_tetur05g04020, Turt.mRNA_tetur05g08340, Turt.mRNA_tetur05g08950, Turt.mRNA_tetur07g03170, Turt.mRNA_tetur08g06100, Turt.mRNA_tetur09g00280, Turt.mRNA_tetur09g03880,…	Tcas.transcript_TC000545_001, Tcas.transcript_TC000546_001, Tcas.transcript_TC000547_001, Tcas.transcript_TC000635_001, Tcas.transcript_TC000829_001, Tcas.transcript_TC001023_001, Tcas.transcript_TC001157_003, Tcas.transcript_TC002659_001, Tcas.transcript_TC003081_001, Tcas.transcript_TC004418_001, Tcas.transcript_TC004624_001, Tcas.transcript_TC004770_001, Tcas.transcript_TC006026_001, Tcas.tran…
OG0000006	IPR008042	Family Retrotransposon, Pao	NA	NA	NA		0	0	4	1	96	0	1	27	0	0	9	0	301	329	0	47	0	28	843	10	NO			Bmor.transcript_BGIBMGA002240-RA, Bmor.transcript_BGIBMGA010095-RA, Bmor.transcript_BGIBMGA010456-RA, Bmor.transcript_BGIBMGA014228-RA	Cele.Transcript_Y20F4.8	Cscu.CSCU000085-RA, Cscu.CSCU001015-RA, Cscu.CSCU001703-RA, Cscu.CSCU001704-RA, Cscu.CSCU002131-RA, Cscu.CSCU002464-RA, Cscu.CSCU003095-RA, Cscu.CSCU003903-RA, Cscu.CSCU004160-RA, Cscu.CSCU004380-RA, Cscu.CSCU004381-RA, Cscu.CSCU004438-RA, Cscu.CSCU004972-RA, Cscu.CSCU006021-RA, Cscu.CSCU006030-RA, Cscu.CSCU006031-RA, Cscu.CSCU006032-RA, Cscu.CSCU006033-RA, Cscu.CSCU007088-RA, Cscu.CSCU007090-RA,…			Dpul.mRNA8840	Dpte.g10033.t1, Dpte.g11082.t1, Dpte.g11156.t1, Dpte.g11650.t1, Dpte.g11905.t1, Dpte.g11906.t1, Dpte.g12054.t1, Dpte.g12058.t1, Dpte.g12089.t1, Dpte.g12158.t1, Dpte.g12178.t1, Dpte.g12261.t1, Dpte.g12278.t1, Dpte.g12279.t1, Dpte.g12302.t1, Dpte.g12308.t1, Dpte.g12329.t1, Dpte.g12364.t1, Dpte.g12473.t1, Dpte.g12492.t1, Dpte.g3142.t1, Dpte.g3322.t1, Dpte.g3769.t1, Dpte.g4101.t1, Dpte.g4102.t1, Dpte…			Isca.ISCW001295-RA, Isca.ISCW007930-RA, Isca.ISCW010245-RA, Isca.ISCW011688-RA, Isca.ISCW011783-RA, Isca.ISCW014312-RA, Isca.ISCW014842-RA, Isca.ISCW015153-RA, Isca.ISCW016139-RA		Mocc.rna10057, Mocc.rna10060, Mocc.rna10070, Mocc.rna10077, Mocc.rna10211, Mocc.rna10212, Mocc.rna1040, Mocc.rna1048, Mocc.rna10669, Mocc.rna10672, Mocc.rna10710, Mocc.rna1083, Mocc.rna1087, Mocc.rna10930, Mocc.rna11018, Mocc.rna11019, Mocc.rna1177, Mocc.rna1254, Mocc.rna1263, Mocc.rna12941, Mocc.rna13109, Mocc.rna13764, Mocc.rna14017, Mocc.rna14598, Mocc.rna1577, Mocc.rna16147, Mocc.rna16148, Mo…	Ptep.aug3.g10210.t1, Ptep.aug3.g10211.t1, Ptep.aug3.g10259.t1, Ptep.aug3.g10617.t1, Ptep.aug3.g10692.t1, Ptep.aug3.g10934.t1, Ptep.aug3.g10935.t1, Ptep.aug3.g11098.t1, Ptep.aug3.g11250.t1, Ptep.aug3.g11562.t1, Ptep.aug3.g11563.t1, Ptep.aug3.g11614.t3, Ptep.aug3.g11713.t1, Ptep.aug3.g11714.t1, Ptep.aug3.g11745.t1, Ptep.aug3.g11922.t1, Ptep.aug3.g11976.t1, Ptep.aug3.g11985.t1, Ptep.aug3.g12087.t1, …			Smar.transcript_SMAR000162-RA, Smar.transcript_SMAR000169-RA, Smar.transcript_SMAR000183-RA, Smar.transcript_SMAR000184-RA, Smar.transcript_SMAR000376-RA, Smar.transcript_SMAR000451-RA, Smar.transcript_SMAR000610-RA, Smar.transcript_SMAR001008-RA, Smar.transcript_SMAR001029-RA, Smar.transcript_SMAR001030-RA, Smar.transcript_SMAR001216-RA, Smar.transcript_SMAR001514-RA, Smar.transcript_SMAR001522-…		Tcas.transcript_TC000146_001, Tcas.transcript_TC001684_001, Tcas.transcript_TC001838_001, Tcas.transcript_TC002041_001, Tcas.transcript_TC002178_001, Tcas.transcript_TC002275_001, Tcas.transcript_TC002325_001, Tcas.transcript_TC002454_001, Tcas.transcript_TC004189_001, Tcas.transcript_TC005020_001, Tcas.transcript_TC006136_001, Tcas.transcript_TC006932_001, Tcas.transcript_TC008524_001, Tcas.tran…
OG0000007	None	None	GO:0008586 ( imaginal disc-derived wing vein morphogenesis ), GO:0001745 ( compound eye morphogenesis ), GO:0007173 ( epidermal growth factor receptor signaling pathway ), GO:0001752 ( compound eye photoreceptor fate commitment ), GO:0007526 ( larval somatic muscle development ), GO:0007476 ( imaginal disc-derived wing morphogenesis )	expansion	expansion		4	1	13	0	69	2	1	11	1	2	10	7	49	444	2	6	2	59	683	17	NO	Alyc.aculy02g09440.1, Alyc.aculy04g02420.1, Alyc.aculy04g02430.1, Alyc.aculy04g06310.1	Agam.AGAP009607-RA	Bmor.transcript_BGIBMGA002447-RA, Bmor.transcript_BGIBMGA004760-RA, Bmor.transcript_BGIBMGA006129-RA, Bmor.transcript_BGIBMGA008526-RA, Bmor.transcript_BGIBMGA008738-RA, Bmor.transcript_BGIBMGA012576-RA, Bmor.transcript_BGIBMGA012804-RA, Bmor.transcript_BGIBMGA013208-RA, Bmor.transcript_BGIBMGA013361-RA, Bmor.transcript_BGIBMGA013805-RA, Bmor.transcript_BGIBMGA013806-RA, Bmor.transcript_BGIBMGA01…		Cscu.CSCU000563-RA, Cscu.CSCU002468-RA, Cscu.CSCU002701-RA, Cscu.CSCU003098-RA, Cscu.CSCU004378-RA, Cscu.CSCU007839-RA, Cscu.CSCU008743-RA, Cscu.CSCU009472-RA, Cscu.CSCU010064-RA, Cscu.CSCU010180-RA, Cscu.CSCU011227-RA, Cscu.CSCU011237-RA, Cscu.CSCU012113-RA, Cscu.CSCU013690-RA, Cscu.CSCU013692-RA, Cscu.CSCU013693-RA, Cscu.CSCU013695-RA, Cscu.CSCU013697-RA, Cscu.CSCU013700-RA, Cscu.CSCU013702-RA,…	Drer.transcript_ENSDART00000090548, Drer.transcript_ENSDART00000102665		Dpul.mRNA7846	Dpte.g11393.t1, Dpte.g11886.t1, Dpte.g12350.t1, Dpte.g1415.t1, Dpte.g1774.t1, Dpte.g3743.t1, Dpte.g5072.t1, Dpte.g8158.t1, Dpte.g8779.t1, Dpte.g9376.t1, Dpte.g9687.t1	Dmel.FBtr0077952	Hsap.transcript_ENST00000514044, Hsap.transcript_ENST00000533904	Isca.ISCW000775-RA, Isca.ISCW001296-RA, Isca.ISCW004910-RA, Isca.ISCW009324-RA, Isca.ISCW012563-RA, Isca.ISCW013364-RA, Isca.ISCW014947-RA, Isca.ISCW018281-RA, Isca.ISCW018661-RA, Isca.ISCW021625-RA	Lpol.rna14461, Lpol.rna15154, Lpol.rna1560, Lpol.rna19405, Lpol.rna21584, Lpol.rna4390, Lpol.rna5385	Mocc.rna10153, Mocc.rna10331, Mocc.rna13142, Mocc.rna1716, Mocc.rna17313, Mocc.rna17314, Mocc.rna1755, Mocc.rna1762, Mocc.rna1765, Mocc.rna1766, Mocc.rna18843, Mocc.rna2309, Mocc.rna2363, Mocc.rna2368, Mocc.rna2370, Mocc.rna2616, Mocc.rna2813, Mocc.rna319, Mocc.rna3376, Mocc.rna4110, Mocc.rna4115, Mocc.rna4296, Mocc.rna4501, Mocc.rna4806, Mocc.rna4816, Mocc.rna4988, Mocc.rna5184, Mocc.rna5185, Mo…	Ptep.aug3.g100.t1, Ptep.aug3.g10136.t1, Ptep.aug3.g10137.t1, Ptep.aug3.g10155.t1, Ptep.aug3.g1021.t1, Ptep.aug3.g10215.t1, Ptep.aug3.g10318.t1, Ptep.aug3.g10319.t1, Ptep.aug3.g10320.t1, Ptep.aug3.g10321.t1, Ptep.aug3.g10323.t1, Ptep.aug3.g10324.t1, Ptep.aug3.g10325.t1, Ptep.aug3.g10329.t1, Ptep.aug3.g10333.t1, Ptep.aug3.g10334.t1, Ptep.aug3.g10437.t1, Ptep.aug3.g10550.t1, Ptep.aug3.g10628.t1, Pte…		Phum.transcript_PHUM116690-RA, Phum.transcript_PHUM625790-RA	Smar.transcript_SMAR000505-RA, Smar.transcript_SMAR003178-RA, Smar.transcript_SMAR006321-RA, Smar.transcript_SMAR011807-RA, Smar.transcript_SMAR012568-RA, Smar.transcript_SMAR015285-RA	Turt.mRNA_tetur04g02090, Turt.mRNA_tetur42g00180	Tcas.transcript_TC001483_001, Tcas.transcript_TC001509_001, Tcas.transcript_TC001646_001, Tcas.transcript_TC001993_001, Tcas.transcript_TC002169_001, Tcas.transcript_TC002170_001, Tcas.transcript_TC002236_001, Tcas.transcript_TC004077_001, Tcas.transcript_TC004339_001, Tcas.transcript_TC004341_001, Tcas.transcript_TC004346_001, Tcas.transcript_TC005203_001, Tcas.transcript_TC005241_001, Tcas.tran…
OG0000008	IPR002492;IPR038717	Domain Transposase, Tc1-like;Domain Tc1-like transposase, DDE domain	NA	NA	NA		0	0	3	0	17	0	0	4	0	0	0	7	2	616	1	0	0	16	666	8	NO			Bmor.transcript_BGIBMGA002511-RA, Bmor.transcript_BGIBMGA003735-RA, Bmor.transcript_BGIBMGA011065-RA		Cscu.CSCU000812-RA, Cscu.CSCU000867-RA, Cscu.CSCU001661-RA, Cscu.CSCU001986-RA, Cscu.CSCU001987-RA, Cscu.CSCU002253-RA, Cscu.CSCU014208-RA, Cscu.CSCU014346-RA, Cscu.CSCU017265-RA, Cscu.CSCU019251-RA, Cscu.CSCU020551-RA, Cscu.CSCU022798-RA, Cscu.CSCU023327-RA, Cscu.CSCU024972-RA, Cscu.CSCU026427-RA, Cscu.CSCU029171-RA, Cscu.CSCU029592-RA				Dpte.g12017.t1, Dpte.g1591.t1, Dpte.g2850.t1, Dpte.g5968.t1				Lpol.rna15268, Lpol.rna17339, Lpol.rna17373, Lpol.rna23412, Lpol.rna6092, Lpol.rna7259, Lpol.rna9460	Mocc.rna16430, Mocc.rna3671	Ptep.aug3.g10063.t1, Ptep.aug3.g1008.t1, Ptep.aug3.g10089.t2, Ptep.aug3.g10096.t1, Ptep.aug3.g10104.t1, Ptep.aug3.g10105.t1, Ptep.aug3.g10125.t1, Ptep.aug3.g10144.t1, Ptep.aug3.g10249.t1, Ptep.aug3.g1043.t1, Ptep.aug3.g10488.t1, Ptep.aug3.g10535.t1, Ptep.aug3.g10555.t1, Ptep.aug3.g10643.t1, Ptep.aug3.g10683.t1, Ptep.aug3.g10705.t1, Ptep.aug3.g10727.t1, Ptep.aug3.g10887.t1, Ptep.aug3.g10894.t1, Pt…		Phum.transcript_PHUM599110-RA			Tcas.transcript_TC002292_001, Tcas.transcript_TC002355_001, Tcas.transcript_TC002753_001, Tcas.transcript_TC002845_001, Tcas.transcript_TC003592_001, Tcas.transcript_TC004212_001, Tcas.transcript_TC004213_001, Tcas.transcript_TC005001_001, Tcas.transcript_TC005206_001, Tcas.transcript_TC008498_001, Tcas.transcript_TC010082_001, Tcas.transcript_TC010218_001, Tcas.transcript_TC010292_001, Tcas.tran…
OG0000009	IPR013103	Domain Reverse transcriptase, RNA-dependent DNA polymerase	NA	contraction	contraction		1	0	17	0	49	0	1	33	1	0	0	0	268	101	0	122	0	12	605	10	NO	Alyc.aculy01g22810.1		Bmor.transcript_BGIBMGA002333-RA, Bmor.transcript_BGIBMGA002389-RA, Bmor.transcript_BGIBMGA003210-RA, Bmor.transcript_BGIBMGA004153-RA, Bmor.transcript_BGIBMGA008115-RA, Bmor.transcript_BGIBMGA008441-RA, Bmor.transcript_BGIBMGA008832-RA, Bmor.transcript_BGIBMGA009757-RA, Bmor.transcript_BGIBMGA010097-RA, Bmor.transcript_BGIBMGA011035-RA, Bmor.transcript_BGIBMGA012717-RA, Bmor.transcript_BGIBMGA01…		Cscu.CSCU000447-RA, Cscu.CSCU001261-RA, Cscu.CSCU005161-RA, Cscu.CSCU006520-RA, Cscu.CSCU006533-RA, Cscu.CSCU006956-RA, Cscu.CSCU007589-RA, Cscu.CSCU008744-RA, Cscu.CSCU008923-RA, Cscu.CSCU009549-RA, Cscu.CSCU010023-RA, Cscu.CSCU011439-RA, Cscu.CSCU012369-RA, Cscu.CSCU012381-RA, Cscu.CSCU012787-RA, Cscu.CSCU014034-RA, Cscu.CSCU014113-RA, Cscu.CSCU014116-RA, Cscu.CSCU014644-RA, Cscu.CSCU014697-RA,…			Dpul.mRNA10926	Dpte.g1006.t1, Dpte.g10446.t1, Dpte.g10449.t1, Dpte.g10834.t1, Dpte.g10836.t1, Dpte.g11077.t1, Dpte.g11108.t1, Dpte.g11420.t1, Dpte.g11639.t1, Dpte.g11646.t1, Dpte.g11922.t1, Dpte.g11961.t1, Dpte.g11978.t1, Dpte.g12079.t1, Dpte.g1208.t1, Dpte.g12086.t1, Dpte.g12191.t1, Dpte.g12230.t1, Dpte.g12337.t1, Dpte.g12340.t1, Dpte.g12369.t1, Dpte.g12423.t1, Dpte.g12449.t1, Dpte.g12512.t1, Dpte.g5312.t1, Dp…	Dmel.FBtr0083569				Mocc.rna10075, Mocc.rna10078, Mocc.rna10079, Mocc.rna10150, Mocc.rna10159, Mocc.rna10420, Mocc.rna10421, Mocc.rna10432, Mocc.rna10768, Mocc.rna1081, Mocc.rna1110, Mocc.rna1111, Mocc.rna1112, Mocc.rna11375, Mocc.rna11376, Mocc.rna11523, Mocc.rna11524, Mocc.rna11803, Mocc.rna12324, Mocc.rna1242, Mocc.rna12483, Mocc.rna1251, Mocc.rna1264, Mocc.rna1272, Mocc.rna12867, Mocc.rna14969, Mocc.rna15113, Mo…	Ptep.aug3.g10078.t1, Ptep.aug3.g10339.t1, Ptep.aug3.g11151.t1, Ptep.aug3.g11343.t1, Ptep.aug3.g11699.t1, Ptep.aug3.g12255.t1, Ptep.aug3.g12922.t1, Ptep.aug3.g12955.t1, Ptep.aug3.g13320.t1, Ptep.aug3.g13435.t1, Ptep.aug3.g1361.t1, Ptep.aug3.g13639.t1, Ptep.aug3.g14133.t1, Ptep.aug3.g14203.t1, Ptep.aug3.g14510.t1, Ptep.aug3.g14762.t1, Ptep.aug3.g15004.t1, Ptep.aug3.g15080.t1, Ptep.aug3.g15317.t1, P…			Smar.transcript_SMAR000037-RA, Smar.transcript_SMAR000099-RA, Smar.transcript_SMAR000101-RA, Smar.transcript_SMAR000159-RA, Smar.transcript_SMAR000164-RA, Smar.transcript_SMAR000233-RA, Smar.transcript_SMAR000234-RA, Smar.transcript_SMAR000335-RA, Smar.transcript_SMAR000378-RA, Smar.transcript_SMAR000419-RA, Smar.transcript_SMAR000498-RA, Smar.transcript_SMAR000518-RA, Smar.transcript_SMAR000545-…		Tcas.transcript_TC001425_001, Tcas.transcript_TC001849_001, Tcas.transcript_TC004184_001, Tcas.transcript_TC011505_001, Tcas.transcript_TC012337_001, Tcas.transcript_TC012338_001, Tcas.transcript_TC031933_001, Tcas.transcript_TC031949_001, Tcas.transcript_TC032884_001, Tcas.transcript_TC033643_001, Tcas.transcript_TC033931_001, Tcas.transcript_TC034911_001
OG0000010	IPR000618	Family Insect cuticle protein	GO:0040003 ( chitin-based cuticle development ), GO:0031012 ( extracellular matrix ), GO:0008010 ( structural constituent of chitin-based larval cuticle ), GO:0005214 ( structural constituent of chitin-based cuticle ), GO:0042302 ( structural constituent of cuticle ), GO:0008010 ( structural constituent of chitin-based larval cuticle ), GO:0040003 ( chitin-based cuticle development ), GO:0031012 …	contraction	NA		21	4	3	0	60	0	5	24	2	0	104	84	80	154	1	6	39	4	591	15	NO	Alyc.aculy01g03140.1, Alyc.aculy01g14320.1, Alyc.aculy01g15820.1, Alyc.aculy01g24100.1, Alyc.aculy01g25300.1, Alyc.aculy01g27680.1, Alyc.aculy01g27950.1, Alyc.aculy01g32410.1, Alyc.aculy02g01950.1, Alyc.aculy02g07490.1, Alyc.aculy02g14090.1, Alyc.aculy02g18090.1, Alyc.aculy02g19800.1, Alyc.aculy02g23220.1, Alyc.aculy02g24490.1, Alyc.aculy02g29910.1, Alyc.aculy03g02840.1, Alyc.aculy04g04380.1, Aly…	Agam.AGAP000177-RA, Agam.AGAP002726-RB, Agam.AGAP009162-RA, Agam.AGAP013248-RA	Bmor.transcript_BGIBMGA000247-RA, Bmor.transcript_BGIBMGA009990-RA, Bmor.transcript_BGIBMGA013163-RA		Cscu.CSCU000058-RA, Cscu.CSCU000319-RA, Cscu.CSCU003038-RA, Cscu.CSCU003986-RA, Cscu.CSCU005536-RA, Cscu.CSCU005684-RA, Cscu.CSCU006225-RA, Cscu.CSCU006849-RA, Cscu.CSCU007700-RA, Cscu.CSCU008568-RA, Cscu.CSCU008569-RA, Cscu.CSCU008769-RA, Cscu.CSCU009347-RA, Cscu.CSCU009498-RA, Cscu.CSCU010015-RA, Cscu.CSCU010016-RA, Cscu.CSCU010017-RA, Cscu.CSCU012048-RA, Cscu.CSCU014815-RA, Cscu.CSCU014816-RA,…			Dpul.mRNA11534, Dpul.mRNA11543, Dpul.mRNA15748, Dpul.mRNA16655, Dpul.mRNA4183	Dpte.g10378.t1, Dpte.g10907.t1, Dpte.g11759.t1, Dpte.g12180.t1, Dpte.g12398.t1, Dpte.g1708.t1, Dpte.g3489.t1, Dpte.g3578.t1, Dpte.g3579.t1, Dpte.g367.t1, Dpte.g3733.t1, Dpte.g6729.t1, Dpte.g6730.t1, Dpte.g6731.t1, Dpte.g686.t1, Dpte.g759.t1, Dpte.g8037.t1, Dpte.g8038.t1, Dpte.g8132.t1, Dpte.g893.t1, Dpte.g9494.t1, Dpte.g9496.t1, Dpte.g9635.t1, Dpte.g9936.t1	Dmel.FBtr0112768, Dmel.FBtr0299803		Isca.ISCW000526-RA, Isca.ISCW000730-RA, Isca.ISCW001420-RA, Isca.ISCW001781-RA, Isca.ISCW001782-RA, Isca.ISCW002039-RA, Isca.ISCW002826-RA, Isca.ISCW002954-RA, Isca.ISCW002955-RA, Isca.ISCW003132-RA, Isca.ISCW003549-RA, Isca.ISCW003783-RA, Isca.ISCW003784-RA, Isca.ISCW003785-RA, Isca.ISCW003786-RA, Isca.ISCW003787-RA, Isca.ISCW003790-RA, Isca.ISCW003791-RA, Isca.ISCW004509-RA, Isca.ISCW004552-RA,…	Lpol.rna10050, Lpol.rna10051, Lpol.rna10052, Lpol.rna1050, Lpol.rna1051, Lpol.rna1052, Lpol.rna1061, Lpol.rna1062, Lpol.rna1063, Lpol.rna1064, Lpol.rna10926, Lpol.rna10948, Lpol.rna11727, Lpol.rna11728, Lpol.rna11729, Lpol.rna11877, Lpol.rna12589, Lpol.rna13290, Lpol.rna13836, Lpol.rna13837, Lpol.rna1413, Lpol.rna1414, Lpol.rna1415, Lpol.rna1416, Lpol.rna1417, Lpol.rna14787, Lpol.rna14979, Lpol.r…	Mocc.rna10274, Mocc.rna10368, Mocc.rna10496, Mocc.rna10602, Mocc.rna10693, Mocc.rna11120, Mocc.rna11123, Mocc.rna11851, Mocc.rna12075, Mocc.rna12432, Mocc.rna12433, Mocc.rna12726, Mocc.rna12727, Mocc.rna12950, Mocc.rna13259, Mocc.rna13805, Mocc.rna14062, Mocc.rna14776, Mocc.rna151, Mocc.rna153, Mocc.rna154, Mocc.rna15409, Mocc.rna15423, Mocc.rna15657, Mocc.rna15723, Mocc.rna15801, Mocc.rna15836, …	Ptep.aug3.g1042.t2, Ptep.aug3.g1044.t1, Ptep.aug3.g10751.t1, Ptep.aug3.g10752.t1, Ptep.aug3.g10753.t1, Ptep.aug3.g10755.t1, Ptep.aug3.g10756.t1, Ptep.aug3.g10757.t1, Ptep.aug3.g10758.t1, Ptep.aug3.g10759.t1, Ptep.aug3.g10760.t1, Ptep.aug3.g10761.t1, Ptep.aug3.g10762.t1, Ptep.aug3.g11075.t1, Ptep.aug3.g11132.t1, Ptep.aug3.g11261.t1, Ptep.aug3.g11262.t1, Ptep.aug3.g11263.t1, Ptep.aug3.g11264.t1, Pt…		Phum.transcript_PHUM240590-RA	Smar.transcript_SMAR004782-RA, Smar.transcript_SMAR004823-RA, Smar.transcript_SMAR006641-RA, Smar.transcript_SMAR011461-RA, Smar.transcript_SMAR014131-RA, Smar.transcript_SMAR014327-RA	Turt.mRNA_tetur01g00130, Turt.mRNA_tetur01g04380, Turt.mRNA_tetur01g12820, Turt.mRNA_tetur01g12830, Turt.mRNA_tetur01g12840, Turt.mRNA_tetur01g15250, Turt.mRNA_tetur02g07000, Turt.mRNA_tetur03g02980, Turt.mRNA_tetur05g02790, Turt.mRNA_tetur05g04530, Turt.mRNA_tetur06g01680, Turt.mRNA_tetur07g01030, Turt.mRNA_tetur07g08039, Turt.mRNA_tetur09g03360, Turt.mRNA_tetur09g06230, Turt.mRNA_tetur10g00330,…	Tcas.transcript_TC008400_001, Tcas.transcript_TC013810_001, Tcas.transcript_TC015304_001, Tcas.transcript_TC034021_001
OG0000011	IPR010285	Family DNA helicase Pif1-like	GO:0006281 ( DNA repair ), GO:0043141 ( ATP-dependent 5'-3' DNA helicase activity ), GO:0006260 ( DNA replication ), GO:0032211 ( negative regulation of telomere maintenance via telomerase ), GO:0044806 ( G-quadruplex DNA unwinding ), GO:0005657 ( replication fork ), GO:0010521 ( telomerase inhibitor activity ), GO:0005634 ( nucleus ), GO:0032508 ( DNA duplex unwinding ), GO:0000002 ( mitochondri…	contraction	NA		5	1	18	13	161	1	0	6	1	1	2	43	141	109	0	14	1	12	529	16	NO	Alyc.aculy01g17050.1, Alyc.aculy02g02030.1, Alyc.aculy02g02040.1, Alyc.aculy04g09980.1, Alyc.aculy04g09990.1	Agam.AGAP007775-RA	Bmor.transcript_BGIBMGA001158-RA, Bmor.transcript_BGIBMGA001822-RA, Bmor.transcript_BGIBMGA002329-RA, Bmor.transcript_BGIBMGA003354-RA, Bmor.transcript_BGIBMGA005112-RA, Bmor.transcript_BGIBMGA005971-RA, Bmor.transcript_BGIBMGA006821-RA, Bmor.transcript_BGIBMGA007057-RA, Bmor.transcript_BGIBMGA008616-RA, Bmor.transcript_BGIBMGA008898-RA, Bmor.transcript_BGIBMGA009444-RA, Bmor.transcript_BGIBMGA00…	Cele.Transcript_C11G6.2, Cele.Transcript_F11C3.1, Cele.Transcript_F33H12.6, Cele.Transcript_F52G3.3, Cele.Transcript_F59H6.5, Cele.Transcript_T19C9.10a, Cele.Transcript_Y116F11A.1, Cele.Transcript_Y16E11A.2, Cele.Transcript_Y18H1A.6a, Cele.Transcript_Y46B2A.2, Cele.Transcript_Y53F4B.26, Cele.Transcript_Y53F4B.7, Cele.Transcript_ZK250.9	Cscu.CSCU000692-RA, Cscu.CSCU000693-RA, Cscu.CSCU000694-RA, Cscu.CSCU000695-RA, Cscu.CSCU000873-RA, Cscu.CSCU000874-RA, Cscu.CSCU001373-RA, Cscu.CSCU001653-RA, Cscu.CSCU001654-RA, Cscu.CSCU001655-RA, Cscu.CSCU001656-RA, Cscu.CSCU002026-RA, Cscu.CSCU002719-RA, Cscu.CSCU003424-RA, Cscu.CSCU003426-RA, Cscu.CSCU003428-RA, Cscu.CSCU003429-RA, Cscu.CSCU003794-RA, Cscu.CSCU003936-RA, Cscu.CSCU004104-RA,…	Drer.transcript_ENSDART00000006549			Dpte.g11189.t1, Dpte.g11529.t1, Dpte.g11988.t1, Dpte.g12418.t1, Dpte.g12477.t1, Dpte.g8273.t1	Dmel.FBtr0343239	Hsap.transcript_ENST00000333425	Isca.ISCW005780-RA, Isca.ISCW017426-RA	Lpol.rna10321, Lpol.rna10677, Lpol.rna10678, Lpol.rna14228, Lpol.rna14462, Lpol.rna15316, Lpol.rna1738, Lpol.rna17387, Lpol.rna17708, Lpol.rna18159, Lpol.rna1835, Lpol.rna18428, Lpol.rna18718, Lpol.rna18719, Lpol.rna18725, Lpol.rna20628, Lpol.rna22249, Lpol.rna22250, Lpol.rna24745, Lpol.rna25009, Lpol.rna25048, Lpol.rna25051, Lpol.rna25074, Lpol.rna25083, Lpol.rna25134, Lpol.rna25168, Lpol.rna251…	Mocc.rna10632, Mocc.rna10718, Mocc.rna10906, Mocc.rna10907, Mocc.rna10926, Mocc.rna11508, Mocc.rna11599, Mocc.rna11628, Mocc.rna11783, Mocc.rna11906, Mocc.rna1191, Mocc.rna12010, Mocc.rna12011, Mocc.rna12229, Mocc.rna12267, Mocc.rna12285, Mocc.rna12286, Mocc.rna12287, Mocc.rna1245, Mocc.rna12606, Mocc.rna13087, Mocc.rna13763, Mocc.rna14049, Mocc.rna14949, Mocc.rna14956, Mocc.rna15047, Mocc.rna156…	Ptep.aug3.g10077.t1, Ptep.aug3.g10340.t1, Ptep.aug3.g1056.t1, Ptep.aug3.g11137.t1, Ptep.aug3.g11238.t1, Ptep.aug3.g11566.t1, Ptep.aug3.g11749.t1, Ptep.aug3.g11752.t1, Ptep.aug3.g12147.t1, Ptep.aug3.g12148.t1, Ptep.aug3.g13058.t1, Ptep.aug3.g13271.t1, Ptep.aug3.g1344.t1, Ptep.aug3.g1346.t1, Ptep.aug3.g13552.t1, Ptep.aug3.g1371.t1, Ptep.aug3.g13829.t1, Ptep.aug3.g14031.t1, Ptep.aug3.g14034.t1, Ptep…			Smar.transcript_SMAR000230-RA, Smar.transcript_SMAR000338-RA, Smar.transcript_SMAR000745-RA, Smar.transcript_SMAR001450-RA, Smar.transcript_SMAR001462-RA, Smar.transcript_SMAR001564-RA, Smar.transcript_SMAR002204-RA, Smar.transcript_SMAR004538-RA, Smar.transcript_SMAR006221-RA, Smar.transcript_SMAR006365-RA, Smar.transcript_SMAR007548-RA, Smar.transcript_SMAR007728-RA, Smar.transcript_SMAR012553-…	Turt.mRNA_tetur03g03040	Tcas.transcript_TC001589_001, Tcas.transcript_TC003933_001, Tcas.transcript_TC003934_001, Tcas.transcript_TC004078_001, Tcas.transcript_TC004079_001, Tcas.transcript_TC005254_001, Tcas.transcript_TC010088_001, Tcas.transcript_TC010106_001, Tcas.transcript_TC016070_001, Tcas.transcript_TC016134_001, Tcas.transcript_TC033924_001, Tcas.transcript_TC034949_001
OG0000012	None	None	NA	NA	NA		0	0	0	19	0	121	0	0	0	368	0	0	0	0	0	0	0	0	508	3	NO				Cele.Transcript_C03G6.16, Cele.Transcript_C51E3.1, Cele.Transcript_C51E3.2, Cele.Transcript_C51E3.3, Cele.Transcript_C51E3.4, Cele.Transcript_C51E3.5, Cele.Transcript_F07B10.6, Cele.Transcript_F20A1.3, Cele.Transcript_F38E1.8, Cele.Transcript_F53F8.2, Cele.Transcript_M01B2.7, Cele.Transcript_M01B2.9, Cele.Transcript_T19B10.10, Cele.Transcript_T26E4.14, Cele.Transcript_T26E4.15.1, Cele.Transcript_…		Drer.transcript_ENSDART00000013359, Drer.transcript_ENSDART00000013437, Drer.transcript_ENSDART00000014270, Drer.transcript_ENSDART00000017810, Drer.transcript_ENSDART00000032154, Drer.transcript_ENSDART00000060087, Drer.transcript_ENSDART00000060111, Drer.transcript_ENSDART00000060112, Drer.transcript_ENSDART00000060117, Drer.transcript_ENSDART00000060124, Drer.transcript_ENSDART00000060125, Dre…					Hsap.transcript_ENST00000209540, Hsap.transcript_ENST00000244623, Hsap.transcript_ENST00000248058, Hsap.transcript_ENST00000248072, Hsap.transcript_ENST00000248073, Hsap.transcript_ENST00000248384, Hsap.transcript_ENST00000252835, Hsap.transcript_ENST00000259357, Hsap.transcript_ENST00000259362, Hsap.transcript_ENST00000259466, Hsap.transcript_ENST00000268912, Hsap.transcript_ENST00000277216, Hsa…
OG0000013	None	None	NA	contraction	contraction		0	2	3	0	294	1	0	4	0	18	1	47	53	63	0	0	0	5	491	11	NO		Agam.AGAP012527-RA, Agam.AGAP012551-RA	Bmor.transcript_BGIBMGA006521-RA, Bmor.transcript_BGIBMGA012141-RA, Bmor.transcript_BGIBMGA014081-RA		Cscu.CSCU000463-RA, Cscu.CSCU000464-RA, Cscu.CSCU000577-RA, Cscu.CSCU000613-RA, Cscu.CSCU000676-RA, Cscu.CSCU000677-RA, Cscu.CSCU000705-RA, Cscu.CSCU000745-RA, Cscu.CSCU000803-RA, Cscu.CSCU000804-RA, Cscu.CSCU000850-RA, Cscu.CSCU000851-RA, Cscu.CSCU001024-RA, Cscu.CSCU001189-RA, Cscu.CSCU001342-RA, Cscu.CSCU001629-RA, Cscu.CSCU001638-RA, Cscu.CSCU002090-RA, Cscu.CSCU002103-RA, Cscu.CSCU002222-RA,…	Drer.transcript_ENSDART00000166397			Dpte.g10520.t1, Dpte.g11807.t1, Dpte.g12217.t1, Dpte.g12332.t1		Hsap.transcript_ENST00000268655, Hsap.transcript_ENST00000282326, Hsap.transcript_ENST00000294753, Hsap.transcript_ENST00000322716, Hsap.transcript_ENST00000331336, Hsap.transcript_ENST00000357182, Hsap.transcript_ENST00000373991, Hsap.transcript_ENST00000413761, Hsap.transcript_ENST00000414517, Hsap.transcript_ENST00000449309, Hsap.transcript_ENST00000451013, Hsap.transcript_ENST00000452236, Hsa…	Isca.ISCW011221-RA	Lpol.rna10298, Lpol.rna12849, Lpol.rna13757, Lpol.rna14712, Lpol.rna1526, Lpol.rna1551, Lpol.rna15526, Lpol.rna17740, Lpol.rna19364, Lpol.rna19997, Lpol.rna20021, Lpol.rna20085, Lpol.rna20249, Lpol.rna21082, Lpol.rna2148, Lpol.rna21531, Lpol.rna21997, Lpol.rna22384, Lpol.rna22619, Lpol.rna23054, Lpol.rna2316, Lpol.rna23348, Lpol.rna24348, Lpol.rna24349, Lpol.rna24403, Lpol.rna24753, Lpol.rna24768…	Mocc.rna1047, Mocc.rna1052, Mocc.rna10545, Mocc.rna1261, Mocc.rna12707, Mocc.rna13093, Mocc.rna1453, Mocc.rna1576, Mocc.rna16529, Mocc.rna17044, Mocc.rna1767, Mocc.rna17746, Mocc.rna18785, Mocc.rna18789, Mocc.rna2036, Mocc.rna2206, Mocc.rna2494, Mocc.rna2915, Mocc.rna3023, Mocc.rna31, Mocc.rna32, Mocc.rna3298, Mocc.rna3386, Mocc.rna3707, Mocc.rna3763, Mocc.rna390, Mocc.rna4020, Mocc.rna4282, Mocc…	Ptep.aug3.g10856.t1, Ptep.aug3.g1114.t1, Ptep.aug3.g11215.t1, Ptep.aug3.g11747.t1, Ptep.aug3.g11964.t1, Ptep.aug3.g12021.t1, Ptep.aug3.g12320.t1, Ptep.aug3.g13951.t2, Ptep.aug3.g14005.t1, Ptep.aug3.g14185.t1, Ptep.aug3.g14377.t1, Ptep.aug3.g14570.t1, Ptep.aug3.g14921.t1, Ptep.aug3.g15756.t1, Ptep.aug3.g15950.t1, Ptep.aug3.g17360.t1, Ptep.aug3.g17361.t1, Ptep.aug3.g1799.t1, Ptep.aug3.g18180.t1, Pt…					Tcas.transcript_TC006015_001, Tcas.transcript_TC006077_001, Tcas.transcript_TC010214_001, Tcas.transcript_TC011789_001, Tcas.transcript_TC012929_001
OG0000014	IPR001128	Family Cytochrome P450	GO:0005506 ( iron ion binding ), GO:0020037 ( heme binding ), GO:0016705 ( oxidoreductase activity, acting on paired donors, with incorporation or reduction of molecular oxygen ), GO:0055114 ( oxidation-reduction process ), GO:1901563 ( response to camptothecin ), GO:0016491 ( oxidoreductase activity ), GO:0016705 ( oxidoreductase activity, acting on paired donors, with incorporation or reduction…	contraction	contraction		10	42	27	18	48	6	9	17	38	7	73	13	18	47	11	11	12	63	470	18	NO	Alyc.aculy01g13870.1, Alyc.aculy01g14600.1, Alyc.aculy01g14620.1, Alyc.aculy01g28380.1, Alyc.aculy02g06880.1, Alyc.aculy02g10010.1, Alyc.aculy02g11800.1, Alyc.aculy02g13280.1, Alyc.aculy04g04990.1, Alyc.aculy05g00970.1	Agam.AGAP000818-RA, Agam.AGAP002862-RA, Agam.AGAP002865-RA, Agam.AGAP002866-RA, Agam.AGAP002867-RA, Agam.AGAP002868-RA, Agam.AGAP002869-RA, Agam.AGAP002870-RA, Agam.AGAP002894-RA, Agam.AGAP003343-RA, Agam.AGAP007480-RA, Agam.AGAP008203-RA, Agam.AGAP008204-RA, Agam.AGAP008205-RA, Agam.AGAP008206-RA, Agam.AGAP008207-RA, Agam.AGAP008208-RA, Agam.AGAP008209-RA, Agam.AGAP008210-RA, Agam.AGAP008212-RA,…	Bmor.transcript_BGIBMGA001419-RA, Bmor.transcript_BGIBMGA001573-RA, Bmor.transcript_BGIBMGA002171-RA, Bmor.transcript_BGIBMGA002178-RA, Bmor.transcript_BGIBMGA003293-RA, Bmor.transcript_BGIBMGA003908-RA, Bmor.transcript_BGIBMGA003926-RA, Bmor.transcript_BGIBMGA003943-RA, Bmor.transcript_BGIBMGA003944-RA, Bmor.transcript_BGIBMGA003945-RA, Bmor.transcript_BGIBMGA003957-RA, Bmor.transcript_BGIBMGA00…	Cele.Transcript_C36A4.1, Cele.Transcript_C36A4.2, Cele.Transcript_C36A4.3, Cele.Transcript_C36A4.6, Cele.Transcript_F02C12.5, Cele.Transcript_F14F7.2, Cele.Transcript_F14F7.3, Cele.Transcript_K06B9.1, Cele.Transcript_K06G5.2, Cele.Transcript_T10B9.1, Cele.Transcript_T10B9.10, Cele.Transcript_T10B9.2, Cele.Transcript_T10B9.3, Cele.Transcript_T10B9.4, Cele.Transcript_T10B9.5, Cele.Transcript_T10B9.…	Cscu.CSCU000782-RA, Cscu.CSCU001152-RA, Cscu.CSCU003070-RA, Cscu.CSCU003082-RA, Cscu.CSCU003084-RA, Cscu.CSCU003088-RA, Cscu.CSCU003090-RA, Cscu.CSCU003091-RA, Cscu.CSCU003676-RA, Cscu.CSCU003677-RA, Cscu.CSCU004390-RA, Cscu.CSCU006829-RA, Cscu.CSCU006832-RA, Cscu.CSCU006834-RA, Cscu.CSCU006837-RA, Cscu.CSCU006839-RA, Cscu.CSCU006840-RA, Cscu.CSCU006842-RA, Cscu.CSCU007338-RA, Cscu.CSCU008011-RA,…	Drer.transcript_ENSDART00000018676, Drer.transcript_ENSDART00000102416, Drer.transcript_ENSDART00000109497, Drer.transcript_ENSDART00000130130, Drer.transcript_ENSDART00000137188, Drer.transcript_ENSDART00000170901		Dpul.mRNA12698, Dpul.mRNA1429, Dpul.mRNA15434, Dpul.mRNA15436, Dpul.mRNA16098, Dpul.mRNA16099, Dpul.mRNA16100, Dpul.mRNA5359, Dpul.mRNA7955	Dpte.g11419.t1, Dpte.g3030.t1, Dpte.g3533.t1, Dpte.g3534.t1, Dpte.g3535.t1, Dpte.g3728.t1, Dpte.g3729.t1, Dpte.g3730.t1, Dpte.g409.t1, Dpte.g410.t1, Dpte.g4868.t1, Dpte.g4869.t1, Dpte.g4964.t1, Dpte.g4965.t1, Dpte.g5607.t1, Dpte.g951.t1, Dpte.g9510.t1	Dmel.FBtr0071928, Dmel.FBtr0072321, Dmel.FBtr0074604, Dmel.FBtr0077212, Dmel.FBtr0077748, Dmel.FBtr0079061, Dmel.FBtr0079062, Dmel.FBtr0079925, Dmel.FBtr0080587, Dmel.FBtr0081077, Dmel.FBtr0082598, Dmel.FBtr0084304, Dmel.FBtr0086133, Dmel.FBtr0087405, Dmel.FBtr0087452, Dmel.FBtr0087453, Dmel.FBtr0087455, Dmel.FBtr0087456, Dmel.FBtr0087820, Dmel.FBtr0087992, Dmel.FBtr0087993, Dmel.FBtr0088009, Dme…	Hsap.transcript_ENST00000222382, Hsap.transcript_ENST00000222982, Hsap.transcript_ENST00000334194, Hsap.transcript_ENST00000336374, Hsap.transcript_ENST00000336411, Hsap.transcript_ENST00000416849, Hsap.transcript_ENST00000611620	Isca.ISCW000164-RA, Isca.ISCW000434-RA, Isca.ISCW000510-RA, Isca.ISCW001103-RA, Isca.ISCW001104-RA, Isca.ISCW001105-RA, Isca.ISCW001241-RA, Isca.ISCW001306-RA, Isca.ISCW001418-RA, Isca.ISCW001473-RA, Isca.ISCW001475-RA, Isca.ISCW001621-RA, Isca.ISCW001974-RA, Isca.ISCW002938-RA, Isca.ISCW003160-RA, Isca.ISCW003215-RA, Isca.ISCW004132-RA, Isca.ISCW004905-RA, Isca.ISCW005054-RA, Isca.ISCW005198-RA,…	Lpol.rna11281, Lpol.rna12683, Lpol.rna15308, Lpol.rna16884, Lpol.rna16885, Lpol.rna16886, Lpol.rna19491, Lpol.rna19496, Lpol.rna22126, Lpol.rna25017, Lpol.rna7081, Lpol.rna9759, Lpol.rna9846	Mocc.rna10890, Mocc.rna11291, Mocc.rna11874, Mocc.rna12444, Mocc.rna12560, Mocc.rna13047, Mocc.rna13048, Mocc.rna13049, Mocc.rna13406, Mocc.rna14533, Mocc.rna14773, Mocc.rna18814, Mocc.rna4724, Mocc.rna5116, Mocc.rna7240, Mocc.rna7838, Mocc.rna863, Mocc.rna8634	Ptep.aug3.g10095.t1, Ptep.aug3.g11406.t1, Ptep.aug3.g11793.t2, Ptep.aug3.g11882.t1, Ptep.aug3.g11884.t1, Ptep.aug3.g12552.t1, Ptep.aug3.g12839.t1, Ptep.aug3.g14617.t1, Ptep.aug3.g14618.t1, Ptep.aug3.g14719.t1, Ptep.aug3.g14720.t1, Ptep.aug3.g14721.t1, Ptep.aug3.g14723.t1, Ptep.aug3.g14724.t1, Ptep.aug3.g14725.t1, Ptep.aug3.g14726.t1, Ptep.aug3.g14808.t1, Ptep.aug3.g15628.t1, Ptep.aug3.g15753.t1, …		Phum.transcript_PHUM098900-RA, Phum.transcript_PHUM098910-RA, Phum.transcript_PHUM299810-RA, Phum.transcript_PHUM397050-RA, Phum.transcript_PHUM417180-RA, Phum.transcript_PHUM417190-RA, Phum.transcript_PHUM459170-RA, Phum.transcript_PHUM459190-RA, Phum.transcript_PHUM567450-RA, Phum.transcript_PHUM602250-RA, Phum.transcript_PHUM618360-RA	Smar.transcript_SMAR000135-RA, Smar.transcript_SMAR002727-RA, Smar.transcript_SMAR008001-RA, Smar.transcript_SMAR008263-RA, Smar.transcript_SMAR010453-RA, Smar.transcript_SMAR010456-RA, Smar.transcript_SMAR010457-RA, Smar.transcript_SMAR010459-RA, Smar.transcript_SMAR010460-RA, Smar.transcript_SMAR014988-RA, Smar.transcript_SMAR015584-RA	Turt.mRNA_tetur03g01560, Turt.mRNA_tetur05g04000, Turt.mRNA_tetur07g05500, Turt.mRNA_tetur11g05000, Turt.mRNA_tetur11g05520, Turt.mRNA_tetur11g05540, Turt.mRNA_tetur14g01340, Turt.mRNA_tetur26g01470, Turt.mRNA_tetur38g00650, Turt.mRNA_tetur46g00150, Turt.mRNA_tetur46g00170, Turt.mRNA_tetur602g00010	Tcas.transcript_TC000148_002, Tcas.transcript_TC000151_001, Tcas.transcript_TC000152_001, Tcas.transcript_TC000153_001, Tcas.transcript_TC000282_001, Tcas.transcript_TC000856_001, Tcas.transcript_TC001546_001, Tcas.transcript_TC004818_001, Tcas.transcript_TC005351_001, Tcas.transcript_TC005352_001, Tcas.transcript_TC005384_001, Tcas.transcript_TC005385_001, Tcas.transcript_TC005386_001, Tcas.tran…
OG0000015	IPR000276	Family G protein-coupled receptor, rhodopsin-like	GO:0005886 ( plasma membrane ), GO:0007377 ( germ-band extension ), GO:0004993 ( G-protein coupled serotonin receptor activity ), GO:0016021 ( integral component of membrane ), GO:0007210 ( serotonin receptor signaling pathway ), GO:0001587 ( Gq/11-coupled serotonin receptor activity ), GO:0008227 ( G-protein coupled amine receptor activity ), GO:0007186 ( G-protein coupled receptor signaling pat…	contraction	contraction		10	17	19	15	25	108	17	12	16	34	14	58	12	24	17	16	24	15	453	18	NO	Alyc.aculy01g21970.1, Alyc.aculy01g33970.1, Alyc.aculy02g01140.1, Alyc.aculy02g05100.1, Alyc.aculy02g10490.1, Alyc.aculy02g12690.1, Alyc.aculy02g20740.1, Alyc.aculy02g22470.1, Alyc.aculy03g11600.1, Alyc.aculy04g10990.1	Agam.AGAP000045-RA, Agam.AGAP000606-RA, Agam.AGAP000667-RA, Agam.AGAP002229-RA, Agam.AGAP002232-RA, Agam.AGAP002519-RA, Agam.AGAP002886-RB, Agam.AGAP002888-RC, Agam.AGAP004034-RA, Agam.AGAP004222-RB, Agam.AGAP004223-RA, Agam.AGAP004453-RB, Agam.AGAP004613-RA, Agam.AGAP007136-RA, Agam.AGAP011481-RA, Agam.AGAP012698-RA, Agam.AGAP013324-RA	Bmor.transcript_BGIBMGA002248-RA, Bmor.transcript_BGIBMGA002249-RA, Bmor.transcript_BGIBMGA002275-RA, Bmor.transcript_BGIBMGA002276-RA, Bmor.transcript_BGIBMGA002277-RA, Bmor.transcript_BGIBMGA002287-RA, Bmor.transcript_BGIBMGA002316-RA, Bmor.transcript_BGIBMGA002325-RA, Bmor.transcript_BGIBMGA002326-RA, Bmor.transcript_BGIBMGA002327-RA, Bmor.transcript_BGIBMGA006929-RA, Bmor.transcript_BGIBMGA00…	Cele.Transcript_C02D4.2e, Cele.Transcript_C09B7.1a, Cele.Transcript_C52B11.3, Cele.Transcript_F01E11.5c, Cele.Transcript_F14D12.6b, Cele.Transcript_F15A8.5a, Cele.Transcript_F16D3.7, Cele.Transcript_F59C12.2a, Cele.Transcript_K02F2.6, Cele.Transcript_K09G1.4c, Cele.Transcript_M03F4.3b, Cele.Transcript_T02E9.3, Cele.Transcript_T14E8.3b, Cele.Transcript_Y22D7AR.13.1, Cele.Transcript_Y54G2A.35a	Cscu.CSCU000792-RA, Cscu.CSCU000793-RA, Cscu.CSCU002445-RA, Cscu.CSCU002449-RA, Cscu.CSCU005198-RA, Cscu.CSCU005324-RA, Cscu.CSCU007228-RA, Cscu.CSCU007697-RA, Cscu.CSCU009653-RA, Cscu.CSCU010123-RA, Cscu.CSCU010124-RA, Cscu.CSCU012568-RA, Cscu.CSCU014904-RA, Cscu.CSCU014905-RA, Cscu.CSCU015599-RA, Cscu.CSCU015854-RA, Cscu.CSCU017167-RA, Cscu.CSCU024408-RA, Cscu.CSCU029275-RA, Cscu.CSCU029456-RA,…	Drer.transcript_ENSDART00000003420, Drer.transcript_ENSDART00000007567, Drer.transcript_ENSDART00000013641, Drer.transcript_ENSDART00000014417, Drer.transcript_ENSDART00000014678, Drer.transcript_ENSDART00000016418, Drer.transcript_ENSDART00000018348, Drer.transcript_ENSDART00000024191, Drer.transcript_ENSDART00000025860, Drer.transcript_ENSDART00000030938, Drer.transcript_ENSDART00000036537, Dre…		Dpul.mRNA10900, Dpul.mRNA13818, Dpul.mRNA1517, Dpul.mRNA1524, Dpul.mRNA16343, Dpul.mRNA16881, Dpul.mRNA2282, Dpul.mRNA2286, Dpul.mRNA3768, Dpul.mRNA3784, Dpul.mRNA4432, Dpul.mRNA4441, Dpul.mRNA5514, Dpul.mRNA5515, Dpul.mRNA5517, Dpul.mRNA5518, Dpul.mRNA5524	Dpte.g10886.t1, Dpte.g11008.t1, Dpte.g11071.t1, Dpte.g11500.t1, Dpte.g1165.t1, Dpte.g11939.t1, Dpte.g1683.t1, Dpte.g3694.t1, Dpte.g6429.t1, Dpte.g6756.t1, Dpte.g8805.t1, Dpte.g9087.t1	Dmel.FBtr0078855, Dmel.FBtr0083532, Dmel.FBtr0084260, Dmel.FBtr0085746, Dmel.FBtr0086577, Dmel.FBtr0110936, Dmel.FBtr0290334, Dmel.FBtr0301930, Dmel.FBtr0330029, Dmel.FBtr0330056, Dmel.FBtr0330120, Dmel.FBtr0330144, Dmel.FBtr0330293, Dmel.FBtr0330711, Dmel.FBtr0332174, Dmel.FBtr0343169	Hsap.transcript_ENST00000176183, Hsap.transcript_ENST00000256906, Hsap.transcript_ENST00000258034, Hsap.transcript_ENST00000258400, Hsap.transcript_ENST00000275198, Hsap.transcript_ENST00000275200, Hsap.transcript_ENST00000275216, Hsap.transcript_ENST00000276198, Hsap.transcript_ENST00000280155, Hsap.transcript_ENST00000287907, Hsap.transcript_ENST00000289753, Hsap.transcript_ENST00000304374, Hsa…	Isca.ISCW001496-RA, Isca.ISCW003835-RA, Isca.ISCW005195-RA, Isca.ISCW006077-RA, Isca.ISCW008552-RA, Isca.ISCW008775-RA, Isca.ISCW008917-RA, Isca.ISCW013655-RA, Isca.ISCW015254-RA, Isca.ISCW017050-RA, Isca.ISCW018990-RA, Isca.ISCW019070-RA, Isca.ISCW019072-RA, Isca.ISCW020906-RA	Lpol.rna11910, Lpol.rna12672, Lpol.rna1315, Lpol.rna14387, Lpol.rna15240, Lpol.rna1620, Lpol.rna1621, Lpol.rna1622, Lpol.rna16468, Lpol.rna16787, Lpol.rna18095, Lpol.rna18261, Lpol.rna18393, Lpol.rna18499, Lpol.rna18595, Lpol.rna19006, Lpol.rna19093, Lpol.rna20316, Lpol.rna2034, Lpol.rna2035, Lpol.rna2036, Lpol.rna20457, Lpol.rna20476, Lpol.rna21545, Lpol.rna22087, Lpol.rna22299, Lpol.rna22382, L…	Mocc.rna10524, Mocc.rna11199, Mocc.rna11342, Mocc.rna1409, Mocc.rna18298, Mocc.rna4613, Mocc.rna5204, Mocc.rna7110, Mocc.rna7470, Mocc.rna7961, Mocc.rna8347, Mocc.rna9065	Ptep.aug3.g11982.t1, Ptep.aug3.g12151.t1, Ptep.aug3.g12153.t1, Ptep.aug3.g12558.t1, Ptep.aug3.g12707.t1, Ptep.aug3.g12976.t1, Ptep.aug3.g1472.t1, Ptep.aug3.g15574.t1, Ptep.aug3.g16752.t1, Ptep.aug3.g1685.t1, Ptep.aug3.g17507.t1, Ptep.aug3.g1758.t1, Ptep.aug3.g217.t1, Ptep.aug3.g24124.t1, Ptep.aug3.g25007.t1, Ptep.aug3.g25318.t1, Ptep.aug3.g25321.t1, Ptep.aug3.g27596.t1, Ptep.aug3.g2787.t1, Ptep.a…		Phum.transcript_PHUM027040-RA, Phum.transcript_PHUM204430-RA, Phum.transcript_PHUM220540-RA, Phum.transcript_PHUM238080-RA, Phum.transcript_PHUM286710-RA, Phum.transcript_PHUM434300-RA, Phum.transcript_PHUM434420-RA, Phum.transcript_PHUM440560-RA, Phum.transcript_PHUM457080-RA, Phum.transcript_PHUM460900-RA, Phum.transcript_PHUM460920-RA, Phum.transcript_PHUM497230-RA, Phum.transcript_PHUM515970-…	Smar.transcript_SMAR001034-RA, Smar.transcript_SMAR001036-RA, Smar.transcript_SMAR001037-RA, Smar.transcript_SMAR003308-RA, Smar.transcript_SMAR003398-RA, Smar.transcript_SMAR004065-RA, Smar.transcript_SMAR005363-RA, Smar.transcript_SMAR006339-RA, Smar.transcript_SMAR006454-RA, Smar.transcript_SMAR007193-RA, Smar.transcript_SMAR008607-RA, Smar.transcript_SMAR008761-RA, Smar.transcript_SMAR009993-…	Turt.mRNA_tetur01g05910, Turt.mRNA_tetur01g10700, Turt.mRNA_tetur01g10720, Turt.mRNA_tetur02g05500, Turt.mRNA_tetur03g06850, Turt.mRNA_tetur03g06870, Turt.mRNA_tetur04g00030, Turt.mRNA_tetur05g00040, Turt.mRNA_tetur05g92595, Turt.mRNA_tetur05g92596, Turt.mRNA_tetur08g04980, Turt.mRNA_tetur09g03080, Turt.mRNA_tetur14g01210, Turt.mRNA_tetur14g02750, Turt.mRNA_tetur14g02820, Turt.mRNA_tetur14g93062,…	Tcas.transcript_TC000574_001, Tcas.transcript_TC004545_002, Tcas.transcript_TC011639_001, Tcas.transcript_TC011641_002, Tcas.transcript_TC011667_001, Tcas.transcript_TC011960_001, Tcas.transcript_TC012447_001, Tcas.transcript_TC012597_001, Tcas.transcript_TC012598_001, Tcas.transcript_TC012600_001, Tcas.transcript_TC013979_001, Tcas.transcript_TC013982_001, Tcas.transcript_TC032795_001, Tcas.tran…
OG0000016	IPR013098;IPR003961	Domain Immunoglobulin I-set;Domain Fibronectin type III	GO:0005887 ( integral component of plasma membrane ), GO:0007411 ( axon guidance ), GO:0007422 ( peripheral nervous system development ), GO:0008046 ( axon guidance receptor activity ), GO:0016319 ( mushroom body development ), GO:0007413 ( axonal fasciculation ), GO:0006909 ( phagocytosis ), GO:0032490 ( detection of molecule of bacterial origin ), GO:0003823 ( antigen binding ), GO:0048814 ( re…	contraction	NA		15	5	13	2	63	6	6	12	4	3	43	71	29	72	5	70	27	5	451	18	NO	Alyc.aculy01g00700.1, Alyc.aculy01g09080.1, Alyc.aculy01g10480.1, Alyc.aculy01g11600.1, Alyc.aculy01g16770.1, Alyc.aculy01g16940.1, Alyc.aculy01g30620.1, Alyc.aculy01g30630.1, Alyc.aculy01g30640.1, Alyc.aculy01g30650.1, Alyc.aculy02g04930.1, Alyc.aculy02g06800.1, Alyc.aculy02g17030.1, Alyc.aculy02g26030.1, Alyc.aculy04g07780.1	Agam.AGAP004902-RA, Agam.AGAP005219-RA, Agam.AGAP007092-RA, Agam.AGAP010884-RA, Agam.AGAP012716-RA	Bmor.transcript_BGIBMGA000181-RA, Bmor.transcript_BGIBMGA001923-RA, Bmor.transcript_BGIBMGA001924-RA, Bmor.transcript_BGIBMGA004967-RA, Bmor.transcript_BGIBMGA005744-RA, Bmor.transcript_BGIBMGA005745-RA, Bmor.transcript_BGIBMGA005747-RA, Bmor.transcript_BGIBMGA010363-RA, Bmor.transcript_BGIBMGA013733-RA, Bmor.transcript_BGIBMGA013794-RA, Bmor.transcript_BGIBMGA013795-RA, Bmor.transcript_BGIBMGA01…	Cele.Transcript_C27B7.7a, Cele.Transcript_K07E12.1a.1	Cscu.CSCU000726-RA, Cscu.CSCU001883-RA, Cscu.CSCU001885-RA, Cscu.CSCU001886-RA, Cscu.CSCU001887-RA, Cscu.CSCU001892-RA, Cscu.CSCU001894-RA, Cscu.CSCU001895-RA, Cscu.CSCU004891-RA, Cscu.CSCU004895-RA, Cscu.CSCU004896-RA, Cscu.CSCU004898-RA, Cscu.CSCU005090-RA, Cscu.CSCU005091-RA, Cscu.CSCU005392-RA, Cscu.CSCU005393-RA, Cscu.CSCU009544-RA, Cscu.CSCU011267-RA, Cscu.CSCU011268-RA, Cscu.CSCU011272-RA,…	Drer.transcript_ENSDART00000057095, Drer.transcript_ENSDART00000098038, Drer.transcript_ENSDART00000100152, Drer.transcript_ENSDART00000125045, Drer.transcript_ENSDART00000158028, Drer.transcript_ENSDART00000165159		Dpul.mRNA10613, Dpul.mRNA10614, Dpul.mRNA16745, Dpul.mRNA6793, Dpul.mRNA7877, Dpul.mRNA9076	Dpte.g10396.t1, Dpte.g10995.t1, Dpte.g11980.t1, Dpte.g12259.t1, Dpte.g12466.t1, Dpte.g1660.t1, Dpte.g548.t1, Dpte.g562.t1, Dpte.g576.t1, Dpte.g7370.t1, Dpte.g7816.t1, Dpte.g8870.t1	Dmel.FBtr0306767, Dmel.FBtr0330211, Dmel.FBtr0330337, Dmel.FBtr0333589	Hsap.transcript_ENST00000321322, Hsap.transcript_ENST00000361516, Hsap.transcript_ENST00000400454	Isca.ISCW000259-RA, Isca.ISCW000260-RA, Isca.ISCW001245-RA, Isca.ISCW001545-RA, Isca.ISCW001673-RA, Isca.ISCW001732-RA, Isca.ISCW004127-RA, Isca.ISCW004128-RA, Isca.ISCW007947-RA, Isca.ISCW011694-RA, Isca.ISCW014598-RA, Isca.ISCW016099-RA, Isca.ISCW016429-RA, Isca.ISCW016430-RA, Isca.ISCW016431-RA, Isca.ISCW016432-RA, Isca.ISCW016433-RA, Isca.ISCW016434-RA, Isca.ISCW016435-RA, Isca.ISCW016437-RA,…	Lpol.rna10027, Lpol.rna10054, Lpol.rna1080, Lpol.rna11008, Lpol.rna11419, Lpol.rna11788, Lpol.rna11791, Lpol.rna12302, Lpol.rna13714, Lpol.rna15133, Lpol.rna1531, Lpol.rna1585, Lpol.rna160, Lpol.rna162, Lpol.rna163, Lpol.rna16320, Lpol.rna16361, Lpol.rna16806, Lpol.rna17234, Lpol.rna178, Lpol.rna17982, Lpol.rna18324, Lpol.rna19220, Lpol.rna19620, Lpol.rna19740, Lpol.rna2002, Lpol.rna20121, Lpol.r…	Mocc.rna10842, Mocc.rna11506, Mocc.rna1187, Mocc.rna12740, Mocc.rna141, Mocc.rna14164, Mocc.rna14901, Mocc.rna14902, Mocc.rna15152, Mocc.rna15668, Mocc.rna15669, Mocc.rna15670, Mocc.rna15671, Mocc.rna15672, Mocc.rna15673, Mocc.rna15674, Mocc.rna15675, Mocc.rna15676, Mocc.rna15677, Mocc.rna15678, Mocc.rna15679, Mocc.rna15680, Mocc.rna16351, Mocc.rna16518, Mocc.rna17297, Mocc.rna4415, Mocc.rna4416,…	Ptep.aug3.g10045.t1, Ptep.aug3.g1203.t1, Ptep.aug3.g14097.t2, Ptep.aug3.g14551.t1, Ptep.aug3.g14610.t1, Ptep.aug3.g15517.t4, Ptep.aug3.g16013.t1, Ptep.aug3.g16014.t1, Ptep.aug3.g16601.t1, Ptep.aug3.g16920.t1, Ptep.aug3.g17011.t1, Ptep.aug3.g17018.t2, Ptep.aug3.g17489.t1, Ptep.aug3.g17879.t1, Ptep.aug3.g18023.t1, Ptep.aug3.g18024.t2, Ptep.aug3.g18798.t1, Ptep.aug3.g18800.t1, Ptep.aug3.g18884.t1, P…		Phum.transcript_PHUM031590-RA, Phum.transcript_PHUM163340-RA, Phum.transcript_PHUM427190-RA, Phum.transcript_PHUM572430-RA, Phum.transcript_PHUM602300-RA	Smar.transcript_SMAR000414-RA, Smar.transcript_SMAR000616-RA, Smar.transcript_SMAR000686-RA, Smar.transcript_SMAR000919-RA, Smar.transcript_SMAR001994-RA, Smar.transcript_SMAR002122-RA, Smar.transcript_SMAR002919-RA, Smar.transcript_SMAR003721-RA, Smar.transcript_SMAR004310-RA, Smar.transcript_SMAR004313-RA, Smar.transcript_SMAR004329-RA, Smar.transcript_SMAR004812-RA, Smar.transcript_SMAR005038-…	Turt.mRNA_tetur01g01900, Turt.mRNA_tetur04g02780, Turt.mRNA_tetur04g02890, Turt.mRNA_tetur04g92216, Turt.mRNA_tetur07g00600, Turt.mRNA_tetur07g00830, Turt.mRNA_tetur07g02520, Turt.mRNA_tetur08g01050, Turt.mRNA_tetur08g01100, Turt.mRNA_tetur08g04630, Turt.mRNA_tetur08g04640, Turt.mRNA_tetur09g01130, Turt.mRNA_tetur10g00850, Turt.mRNA_tetur11g03400, Turt.mRNA_tetur12g03540, Turt.mRNA_tetur13g04530,…	Tcas.transcript_TC003918_001, Tcas.transcript_TC004993_002, Tcas.transcript_TC012539_001, Tcas.transcript_TC031564_003, Tcas.transcript_TC033567_001
OG0000017	IPR008160	Repeat Collagen triple helix repeat	GO:0005587 ( collagen type IV trimer ), GO:0007391 ( dorsal closure ), GO:0005581 ( collagen trimer ), GO:0005201 ( extracellular matrix structural constituent ), GO:0005604 ( basement membrane ), GO:0035848 ( oviduct morphogenesis ), GO:0055013 ( cardiac muscle cell development ), GO:0060729 ( intestinal epithelial structure maintenance ), GO:0048621 ( post-embryonic digestive tract morphogenesi…	contraction	contraction		2	7	9	117	29	73	44	4	4	45	9	36	8	26	9	9	7	13	451	18	NO	Alyc.aculy02g05640.1, Alyc.aculy02g08310.1	Agam.AGAP004169-RB, Agam.AGAP009200-RA, Agam.AGAP009201-RA, Agam.AGAP009576-RA, Agam.AGAP009581-RA, Agam.AGAP011620-RA, Agam.AGAP012765-RA	Bmor.transcript_BGIBMGA000388-RA, Bmor.transcript_BGIBMGA002746-RA, Bmor.transcript_BGIBMGA004329-RA, Bmor.transcript_BGIBMGA006274-RA, Bmor.transcript_BGIBMGA007861-RA, Bmor.transcript_BGIBMGA012067-RA, Bmor.transcript_BGIBMGA014039-RA, Bmor.transcript_BGIBMGA014040-RA, Bmor.transcript_BGIBMGA014306-RA	Cele.Transcript_AC3.6, Cele.Transcript_B0024.1, Cele.Transcript_B0024.2, Cele.Transcript_B0222.6, Cele.Transcript_B0222.7, Cele.Transcript_B0222.8, Cele.Transcript_B0491.2.1, Cele.Transcript_C01H6.1, Cele.Transcript_C09G5.3, Cele.Transcript_C09G5.4, Cele.Transcript_C09G5.5, Cele.Transcript_C09G5.6.1, Cele.Transcript_C12D8.8, Cele.Transcript_C15A11.1, Cele.Transcript_C15A11.5, Cele.Transcript_C15A…	Cscu.CSCU000599-RA, Cscu.CSCU000600-RA, Cscu.CSCU002097-RA, Cscu.CSCU004659-RA, Cscu.CSCU004661-RA, Cscu.CSCU005010-RA, Cscu.CSCU005011-RA, Cscu.CSCU005707-RA, Cscu.CSCU005708-RA, Cscu.CSCU005744-RA, Cscu.CSCU013182-RA, Cscu.CSCU013183-RA, Cscu.CSCU016469-RA, Cscu.CSCU016470-RA, Cscu.CSCU017240-RA, Cscu.CSCU017244-RA, Cscu.CSCU018160-RA, Cscu.CSCU018161-RA, Cscu.CSCU020429-RA, Cscu.CSCU020431-RA,…	Drer.transcript_ENSDART00000006037, Drer.transcript_ENSDART00000009393, Drer.transcript_ENSDART00000015092, Drer.transcript_ENSDART00000021053, Drer.transcript_ENSDART00000029314, Drer.transcript_ENSDART00000029343, Drer.transcript_ENSDART00000030004, Drer.transcript_ENSDART00000035093, Drer.transcript_ENSDART00000035469, Drer.transcript_ENSDART00000040379, Drer.transcript_ENSDART00000047844, Dre…		Dpul.mRNA10571, Dpul.mRNA10617, Dpul.mRNA11447, Dpul.mRNA11453, Dpul.mRNA11526, Dpul.mRNA13236, Dpul.mRNA13507, Dpul.mRNA1394, Dpul.mRNA14320, Dpul.mRNA14445, Dpul.mRNA16113, Dpul.mRNA16665, Dpul.mRNA16666, Dpul.mRNA16668, Dpul.mRNA16994, Dpul.mRNA17023, Dpul.mRNA17024, Dpul.mRNA17460, Dpul.mRNA17581, Dpul.mRNA17997, Dpul.mRNA329, Dpul.mRNA3982, Dpul.mRNA4369, Dpul.mRNA4404, Dpul.mRNA4939, Dpul.m…	Dpte.g5117.t1, Dpte.g6852.t1, Dpte.g84.t1, Dpte.g85.t1	Dmel.FBtr0079002, Dmel.FBtr0084708, Dmel.FBtr0303650, Dmel.FBtr0333540	Hsap.transcript_ENST00000225964, Hsap.transcript_ENST00000244728, Hsap.transcript_ENST00000261037, Hsap.transcript_ENST00000264828, Hsap.transcript_ENST00000295297, Hsap.transcript_ENST00000297268, Hsap.transcript_ENST00000303045, Hsap.transcript_ENST00000304636, Hsap.transcript_ENST00000320741, Hsap.transcript_ENST00000327097, Hsap.transcript_ENST00000327673, Hsap.transcript_ENST00000327928, Hsa…	Isca.ISCW007526-RA, Isca.ISCW007929-RA, Isca.ISCW009593-RA, Isca.ISCW011659-RA, Isca.ISCW013202-RA, Isca.ISCW014473-RA, Isca.ISCW017189-RA, Isca.ISCW018396-RA, Isca.ISCW022619-RA	Lpol.rna10180, Lpol.rna1034, Lpol.rna11840, Lpol.rna13196, Lpol.rna13197, Lpol.rna13572, Lpol.rna13824, Lpol.rna14441, Lpol.rna14443, Lpol.rna14848, Lpol.rna14851, Lpol.rna15765, Lpol.rna16221, Lpol.rna18154, Lpol.rna18155, Lpol.rna18674, Lpol.rna20959, Lpol.rna21373, Lpol.rna21700, Lpol.rna22508, Lpol.rna24036, Lpol.rna24434, Lpol.rna24439, Lpol.rna24658, Lpol.rna357, Lpol.rna3898, Lpol.rna427, …	Mocc.rna11323, Mocc.rna11324, Mocc.rna11325, Mocc.rna11956, Mocc.rna13802, Mocc.rna14591, Mocc.rna15532, Mocc.rna17124	Ptep.aug3.g10119.t1, Ptep.aug3.g10855.t4, Ptep.aug3.g14277.t1, Ptep.aug3.g14370.t1, Ptep.aug3.g16478.t1, Ptep.aug3.g16479.t2, Ptep.aug3.g16481.t1, Ptep.aug3.g17209.t1, Ptep.aug3.g19790.t1, Ptep.aug3.g21365.t1, Ptep.aug3.g22310.t1, Ptep.aug3.g22392.t1, Ptep.aug3.g22727.t1, Ptep.aug3.g22783.t1, Ptep.aug3.g23024.t1, Ptep.aug3.g23123.t1, Ptep.aug3.g23836.t1, Ptep.aug3.g26230.t3, Ptep.aug3.g27689.t1, …		Phum.transcript_PHUM071390-RA, Phum.transcript_PHUM136030-RA, Phum.transcript_PHUM136040-RA, Phum.transcript_PHUM258300-RA, Phum.transcript_PHUM376900-RA, Phum.transcript_PHUM411450-RA, Phum.transcript_PHUM411770-RA, Phum.transcript_PHUM430790-RA, Phum.transcript_PHUM569140-RA	Smar.transcript_SMAR001051-RA, Smar.transcript_SMAR002500-RA, Smar.transcript_SMAR003950-RA, Smar.transcript_SMAR005280-RA, Smar.transcript_SMAR006482-RA, Smar.transcript_SMAR006484-RA, Smar.transcript_SMAR011327-RA, Smar.transcript_SMAR011692-RA, Smar.transcript_SMAR015280-RA	Turt.mRNA_tetur01g04250, Turt.mRNA_tetur08g02940, Turt.mRNA_tetur12g03750, Turt.mRNA_tetur12g03770, Turt.mRNA_tetur28g00630, Turt.mRNA_tetur38g00230, Turt.mRNA_tetur38g00240	Tcas.transcript_TC013261_001, Tcas.transcript_TC014326_001, Tcas.transcript_TC014637_001, Tcas.transcript_TC014768_001, Tcas.transcript_TC014769_001, Tcas.transcript_TC015245_002, Tcas.transcript_TC031372_001, Tcas.transcript_TC031373_001, Tcas.transcript_TC031632_001, Tcas.transcript_TC033129_001, Tcas.transcript_TC033130_001, Tcas.transcript_TC033181_002, Tcas.transcript_TC033182_001
OG0000018	IPR000618	Family Insect cuticle protein	GO:0042302 ( structural constituent of cuticle ), GO:0040003 ( chitin-based cuticle development ), GO:0008010 ( structural constituent of chitin-based larval cuticle ), GO:0031012 ( extracellular matrix ), GO:0042302 ( structural constituent of cuticle ), GO:0031012 ( extracellular matrix ), GO:0008010 ( structural constituent of chitin-based larval cuticle ), GO:0040003 ( chitin-based cuticle de…	NA	NA		0	104	84	0	0	0	136	0	34	0	1	1	0	2	15	13	0	57	447	10	NO		Agam.AGAP001664-RA, Agam.AGAP001665-RA, Agam.AGAP001666-RA, Agam.AGAP001667-RA, Agam.AGAP001668-RA, Agam.AGAP001669-RA, Agam.AGAP002994-RA, Agam.AGAP003375-RA, Agam.AGAP003377-RA, Agam.AGAP003378-RA, Agam.AGAP003379-RA, Agam.AGAP003380-RA, Agam.AGAP003381-RA, Agam.AGAP003382-RA, Agam.AGAP003383-RA, Agam.AGAP003384-RA, Agam.AGAP003385-RA, Agam.AGAP003390-RA, Agam.AGAP005966-RA, Agam.AGAP005967-RA,…	Bmor.transcript_BGIBMGA000166-RA, Bmor.transcript_BGIBMGA000245-RA, Bmor.transcript_BGIBMGA000246-RA, Bmor.transcript_BGIBMGA000248-RA, Bmor.transcript_BGIBMGA000249-RA, Bmor.transcript_BGIBMGA000250-RA, Bmor.transcript_BGIBMGA000251-RA, Bmor.transcript_BGIBMGA000252-RA, Bmor.transcript_BGIBMGA000253-RA, Bmor.transcript_BGIBMGA000254-RA, Bmor.transcript_BGIBMGA000255-RA, Bmor.transcript_BGIBMGA00…					Dpul.mRNA10506, Dpul.mRNA10879, Dpul.mRNA10899, Dpul.mRNA10903, Dpul.mRNA10905, Dpul.mRNA10914, Dpul.mRNA10916, Dpul.mRNA10917, Dpul.mRNA10918, Dpul.mRNA10920, Dpul.mRNA10921, Dpul.mRNA1147, Dpul.mRNA1148, Dpul.mRNA1168, Dpul.mRNA11814, Dpul.mRNA13260, Dpul.mRNA13302, Dpul.mRNA13304, Dpul.mRNA13431, Dpul.mRNA13480, Dpul.mRNA13486, Dpul.mRNA13685, Dpul.mRNA13686, Dpul.mRNA13693, Dpul.mRNA13841, Dp…		Dmel.FBtr0070815, Dmel.FBtr0072869, Dmel.FBtr0073223, Dmel.FBtr0073252, Dmel.FBtr0073253, Dmel.FBtr0073254, Dmel.FBtr0074933, Dmel.FBtr0074977, Dmel.FBtr0076567, Dmel.FBtr0076601, Dmel.FBtr0076708, Dmel.FBtr0077618, Dmel.FBtr0079831, Dmel.FBtr0079897, Dmel.FBtr0079936, Dmel.FBtr0080281, Dmel.FBtr0080633, Dmel.FBtr0081688, Dmel.FBtr0081689, Dmel.FBtr0081690, Dmel.FBtr0081691, Dmel.FBtr0081692, Dme…		Isca.ISCW024259-RA	Lpol.rna25040		Ptep.aug3.g15575.t1, Ptep.aug3.g22910.t1		Phum.transcript_PHUM058460-RA, Phum.transcript_PHUM058480-RA, Phum.transcript_PHUM058890-RA, Phum.transcript_PHUM058910-RA, Phum.transcript_PHUM058920-RA, Phum.transcript_PHUM146730-RA, Phum.transcript_PHUM146740-RA, Phum.transcript_PHUM147260-RA, Phum.transcript_PHUM150040-RA, Phum.transcript_PHUM150230-RA, Phum.transcript_PHUM364120-RA, Phum.transcript_PHUM492230-RA, Phum.transcript_PHUM492240-…	Smar.transcript_SMAR001809-RA, Smar.transcript_SMAR003455-RA, Smar.transcript_SMAR003644-RA, Smar.transcript_SMAR004381-RA, Smar.transcript_SMAR004793-RA, Smar.transcript_SMAR004794-RA, Smar.transcript_SMAR004819-RA, Smar.transcript_SMAR004820-RA, Smar.transcript_SMAR004821-RA, Smar.transcript_SMAR004822-RA, Smar.transcript_SMAR010210-RA, Smar.transcript_SMAR015014-RA, Smar.transcript_SMAR015782-…		Tcas.transcript_TC000719_001, Tcas.transcript_TC000720_001, Tcas.transcript_TC000721_001, Tcas.transcript_TC000722_001, Tcas.transcript_TC000723_001, Tcas.transcript_TC000724_001, Tcas.transcript_TC000725_001, Tcas.transcript_TC000851_001, Tcas.transcript_TC000853_001, Tcas.transcript_TC002434_001, Tcas.transcript_TC002908_001, Tcas.transcript_TC003109_001, Tcas.transcript_TC003363_001, Tcas.tran…
OG0000019	IPR025398	Domain Domain of unknown function DUF4371	NA	contraction	contraction		0	0	1	0	223	6	0	5	0	3	10	56	72	48	0	3	0	12	439	11	NO			Bmor.transcript_BGIBMGA010196-RA		Cscu.CSCU000215-RA, Cscu.CSCU000216-RA, Cscu.CSCU000420-RA, Cscu.CSCU000421-RA, Cscu.CSCU000639-RA, Cscu.CSCU000787-RA, Cscu.CSCU000822-RA, Cscu.CSCU001411-RA, Cscu.CSCU001492-RA, Cscu.CSCU001840-RA, Cscu.CSCU001841-RA, Cscu.CSCU002514-RA, Cscu.CSCU002515-RA, Cscu.CSCU002569-RA, Cscu.CSCU002570-RA, Cscu.CSCU002571-RA, Cscu.CSCU002607-RA, Cscu.CSCU003461-RA, Cscu.CSCU004088-RA, Cscu.CSCU004328-RA,…	Drer.transcript_ENSDART00000005221, Drer.transcript_ENSDART00000062309, Drer.transcript_ENSDART00000124166, Drer.transcript_ENSDART00000141368, Drer.transcript_ENSDART00000158934, Drer.transcript_ENSDART00000172605			Dpte.g11498.t1, Dpte.g12039.t1, Dpte.g12096.t1, Dpte.g12248.t1, Dpte.g12333.t1		Hsap.transcript_ENST00000260045, Hsap.transcript_ENST00000337963, Hsap.transcript_ENST00000373330	Isca.ISCW000184-RA, Isca.ISCW007799-RA, Isca.ISCW010035-RA, Isca.ISCW010182-RA, Isca.ISCW010789-RA, Isca.ISCW013799-RA, Isca.ISCW024453-RA, Isca.ISCW024606-RA, Isca.ISCW024768-RA, Isca.ISCW024789-RA	Lpol.rna10397, Lpol.rna11130, Lpol.rna11453, Lpol.rna11535, Lpol.rna11618, Lpol.rna1245, Lpol.rna12806, Lpol.rna13356, Lpol.rna13710, Lpol.rna13844, Lpol.rna14033, Lpol.rna14148, Lpol.rna14445, Lpol.rna15042, Lpol.rna15159, Lpol.rna1595, Lpol.rna16376, Lpol.rna16437, Lpol.rna16729, Lpol.rna16740, Lpol.rna17098, Lpol.rna17530, Lpol.rna17587, Lpol.rna18135, Lpol.rna18136, Lpol.rna18191, Lpol.rna192…	Mocc.rna10188, Mocc.rna11202, Mocc.rna12058, Mocc.rna13310, Mocc.rna13962, Mocc.rna14406, Mocc.rna15107, Mocc.rna15136, Mocc.rna15137, Mocc.rna1565, Mocc.rna1566, Mocc.rna15681, Mocc.rna16737, Mocc.rna16738, Mocc.rna16953, Mocc.rna1700, Mocc.rna17535, Mocc.rna17606, Mocc.rna17607, Mocc.rna1857, Mocc.rna18625, Mocc.rna18776, Mocc.rna18815, Mocc.rna2045, Mocc.rna2078, Mocc.rna2249, Mocc.rna2274, Mo…	Ptep.aug3.g10023.t1, Ptep.aug3.g10209.t1, Ptep.aug3.g10331.t1, Ptep.aug3.g11252.t1, Ptep.aug3.g11302.t1, Ptep.aug3.g12242.t1, Ptep.aug3.g12489.t1, Ptep.aug3.g12691.t1, Ptep.aug3.g14132.t1, Ptep.aug3.g14483.t1, Ptep.aug3.g16579.t1, Ptep.aug3.g16879.t1, Ptep.aug3.g190.t1, Ptep.aug3.g19639.t1, Ptep.aug3.g19916.t1, Ptep.aug3.g20443.t1, Ptep.aug3.g20717.t1, Ptep.aug3.g21790.t1, Ptep.aug3.g2199.t1, Pte…			Smar.transcript_SMAR001610-RA, Smar.transcript_SMAR014342-RA, Smar.transcript_SMAR015466-RA		Tcas.transcript_TC001842_001, Tcas.transcript_TC001848_001, Tcas.transcript_TC002023_001, Tcas.transcript_TC005126_001, Tcas.transcript_TC005197_001, Tcas.transcript_TC005256_001, Tcas.transcript_TC006956_001, Tcas.transcript_TC009408_001, Tcas.transcript_TC010694_001, Tcas.transcript_TC016397_001, Tcas.transcript_TC031826_002, Tcas.transcript_TC033477_001
OG0000020	None	None	GO:0006468 ( protein phosphorylation ), GO:0004672 ( protein kinase activity ), GO:0005524 ( ATP binding ), GO:0005634 ( nucleus ), GO:0004674 ( protein serine/threonine kinase activity ), GO:0005737 ( cytoplasm )	contraction	NA		0	4	1	4	6	375	4	1	3	4	6	8	0	2	1	5	2	0	426	15	NO		Agam.AGAP000419-RA, Agam.AGAP005951-RA, Agam.AGAP007688-RA, Agam.AGAP010036-RA	Bmor.transcript_BGIBMGA002591-RA	Cele.Transcript_C06E8.3d, Cele.Transcript_C31G12.4b, Cele.Transcript_F45H7.4.1, Cele.Transcript_T25D10.3	Cscu.CSCU001389-RA, Cscu.CSCU003169-RA, Cscu.CSCU007643-RA, Cscu.CSCU014141-RA, Cscu.CSCU017796-RA, Cscu.CSCU023243-RA	Drer.transcript_ENSDART00000010169, Drer.transcript_ENSDART00000024625, Drer.transcript_ENSDART00000025808, Drer.transcript_ENSDART00000034526, Drer.transcript_ENSDART00000040370, Drer.transcript_ENSDART00000049568, Drer.transcript_ENSDART00000051689, Drer.transcript_ENSDART00000052458, Drer.transcript_ENSDART00000052461, Drer.transcript_ENSDART00000053288, Drer.transcript_ENSDART00000054178, Dre…		Dpul.mRNA15002, Dpul.mRNA15003, Dpul.mRNA2571, Dpul.mRNA4188	Dpte.g1511.t1	Dmel.FBtr0072160, Dmel.FBtr0083025, Dmel.FBtr0083038	Hsap.transcript_ENST00000358649, Hsap.transcript_ENST00000360612, Hsap.transcript_ENST00000373509, Hsap.transcript_ENST00000376509	Isca.ISCW001717-RA, Isca.ISCW004362-RA, Isca.ISCW006007-RA, Isca.ISCW008238-RA, Isca.ISCW012236-RA, Isca.ISCW024208-RA	Lpol.rna15355, Lpol.rna17143, Lpol.rna17241, Lpol.rna24620, Lpol.rna4268, Lpol.rna4912, Lpol.rna6975, Lpol.rna9997		Ptep.aug3.g13177.t2, Ptep.aug3.g13957.t1		Phum.transcript_PHUM002510-RA	Smar.transcript_SMAR000562-RA, Smar.transcript_SMAR008888-RA, Smar.transcript_SMAR008889-RA, Smar.transcript_SMAR013655-RA, Smar.transcript_SMAR015609-RA	Turt.mRNA_tetur02g12950, Turt.mRNA_tetur05g92694
OG0000021	IPR002018	Domain Carboxylesterase, type B	GO:0052689 ( carboxylic ester hydrolase activity ), GO:0052689 ( carboxylic ester hydrolase activity ), GO:0060179 ( male mating behavior ), GO:0050965 ( detection of temperature stimulus involved in sensory perception of pain ), GO:0052689 ( carboxylic ester hydrolase activity ), GO:0052689 ( carboxylic ester hydrolase activity ), GO:0019233 ( sensory perception of pain ), GO:0052689 ( carboxyli…	contraction	contraction		2	31	53	20	32	9	17	14	22	8	56	22	29	8	7	9	45	41	425	18	NO	Alyc.aculy02g10950.1, Alyc.aculy02g24540.1	Agam.AGAP000466-RA, Agam.AGAP001101-RA, Agam.AGAP001356-RA, Agam.AGAP001722-RA, Agam.AGAP001723-RA, Agam.AGAP002391-RA, Agam.AGAP002863-RA, Agam.AGAP005370-RA, Agam.AGAP005371-RA, Agam.AGAP005372-RA, Agam.AGAP005373-RA, Agam.AGAP005756-RA, Agam.AGAP005757-RA, Agam.AGAP005758-RA, Agam.AGAP005833-RA, Agam.AGAP005834-RA, Agam.AGAP005835-RA, Agam.AGAP005836-RA, Agam.AGAP005837-RA, Agam.AGAP006227-RA,…	Bmor.transcript_BGIBMGA000729-RA, Bmor.transcript_BGIBMGA000772-RA, Bmor.transcript_BGIBMGA000773-RA, Bmor.transcript_BGIBMGA000774-RA, Bmor.transcript_BGIBMGA000776-RA, Bmor.transcript_BGIBMGA000837-RA, Bmor.transcript_BGIBMGA000875-RA, Bmor.transcript_BGIBMGA001629-RA, Bmor.transcript_BGIBMGA001630-RA, Bmor.transcript_BGIBMGA001856-RA, Bmor.transcript_BGIBMGA001963-RA, Bmor.transcript_BGIBMGA00…	Cele.Transcript_B0238.1, Cele.Transcript_B0238.7, Cele.Transcript_C52A10.1, Cele.Transcript_C52A10.2, Cele.Transcript_F07C4.12b, Cele.Transcript_F13H6.3, Cele.Transcript_F15A8.6b, Cele.Transcript_F55F3.2a, Cele.Transcript_F56C11.6b, Cele.Transcript_K07C11.4, Cele.Transcript_K11G9.1, Cele.Transcript_K11G9.2, Cele.Transcript_K11G9.3, Cele.Transcript_R12A1.4, Cele.Transcript_R173.3.1, Cele.Transcrip…	Cscu.CSCU000635-RA, Cscu.CSCU003119-RA, Cscu.CSCU003120-RA, Cscu.CSCU003121-RA, Cscu.CSCU003122-RA, Cscu.CSCU003123-RA, Cscu.CSCU003124-RA, Cscu.CSCU008588-RA, Cscu.CSCU017962-RA, Cscu.CSCU017965-RA, Cscu.CSCU018389-RA, Cscu.CSCU018395-RA, Cscu.CSCU018396-RA, Cscu.CSCU018397-RA, Cscu.CSCU019515-RA, Cscu.CSCU019516-RA, Cscu.CSCU019716-RA, Cscu.CSCU019909-RA, Cscu.CSCU022493-RA, Cscu.CSCU022494-RA,…	Drer.transcript_ENSDART00000040598, Drer.transcript_ENSDART00000052989, Drer.transcript_ENSDART00000100190, Drer.transcript_ENSDART00000133375, Drer.transcript_ENSDART00000140191, Drer.transcript_ENSDART00000143952, Drer.transcript_ENSDART00000162131, Drer.transcript_ENSDART00000162429, Drer.transcript_ENSDART00000165342		Dpul.mRNA14220, Dpul.mRNA15391, Dpul.mRNA15735, Dpul.mRNA15736, Dpul.mRNA16584, Dpul.mRNA17498, Dpul.mRNA18231, Dpul.mRNA5373, Dpul.mRNA5374, Dpul.mRNA5375, Dpul.mRNA5376, Dpul.mRNA6750, Dpul.mRNA8427, Dpul.mRNA8507, Dpul.mRNA9301, Dpul.mRNA9303, Dpul.mRNA9525	Dpte.g11081.t1, Dpte.g11214.t1, Dpte.g5195.t1, Dpte.g5684.t1, Dpte.g6899.t1, Dpte.g8138.t1, Dpte.g8157.t1, Dpte.g8497.t1, Dpte.g8784.t1, Dpte.g8785.t1, Dpte.g8838.t1, Dpte.g8932.t1, Dpte.g919.t1, Dpte.g9247.t1	Dmel.FBtr0070624, Dmel.FBtr0071687, Dmel.FBtr0071835, Dmel.FBtr0076004, Dmel.FBtr0081540, Dmel.FBtr0081544, Dmel.FBtr0081546, Dmel.FBtr0081549, Dmel.FBtr0081550, Dmel.FBtr0081553, Dmel.FBtr0087222, Dmel.FBtr0114535, Dmel.FBtr0300486, Dmel.FBtr0300496, Dmel.FBtr0301751, Dmel.FBtr0302355, Dmel.FBtr0303250, Dmel.FBtr0305910, Dmel.FBtr0307274, Dmel.FBtr0333383, Dmel.FBtr0335216, Dmel.FBtr0339621	Hsap.transcript_ENST00000264381, Hsap.transcript_ENST00000303334, Hsap.transcript_ENST00000317091, Hsap.transcript_ENST00000360526, Hsap.transcript_ENST00000372080, Hsap.transcript_ENST00000411582, Hsap.transcript_ENST00000521992, Hsap.transcript_ENST00000540947	Isca.ISCW001079-RA, Isca.ISCW001132-RA, Isca.ISCW001748-RA, Isca.ISCW001837-RA, Isca.ISCW003278-RA, Isca.ISCW004315-RA, Isca.ISCW005431-RA, Isca.ISCW006205-RA, Isca.ISCW006206-RA, Isca.ISCW006376-RA, Isca.ISCW006617-RA, Isca.ISCW007846-RA, Isca.ISCW007848-RA, Isca.ISCW007849-RA, Isca.ISCW007946-RA, Isca.ISCW009205-RA, Isca.ISCW009289-RA, Isca.ISCW012339-RA, Isca.ISCW012483-RA, Isca.ISCW013353-RA,…	Lpol.rna11407, Lpol.rna11408, Lpol.rna1185, Lpol.rna12204, Lpol.rna12444, Lpol.rna15140, Lpol.rna16432, Lpol.rna17111, Lpol.rna19869, Lpol.rna20136, Lpol.rna20438, Lpol.rna2051, Lpol.rna20882, Lpol.rna21015, Lpol.rna22061, Lpol.rna22068, Lpol.rna24677, Lpol.rna24990, Lpol.rna2561, Lpol.rna3666, Lpol.rna4028, Lpol.rna6918	Mocc.rna10539, Mocc.rna10817, Mocc.rna11029, Mocc.rna11030, Mocc.rna12455, Mocc.rna12469, Mocc.rna12824, Mocc.rna12825, Mocc.rna12914, Mocc.rna14173, Mocc.rna14447, Mocc.rna15176, Mocc.rna16469, Mocc.rna17092, Mocc.rna17485, Mocc.rna18243, Mocc.rna3271, Mocc.rna4722, Mocc.rna4799, Mocc.rna5261, Mocc.rna6824, Mocc.rna6825, Mocc.rna6826, Mocc.rna8085, Mocc.rna8591, Mocc.rna8593, Mocc.rna8948, Mocc.…	Ptep.aug3.g10230.t1, Ptep.aug3.g20258.t1, Ptep.aug3.g25365.t1, Ptep.aug3.g4418.t1, Ptep.aug3.g5734.t1, Ptep.aug3.g6379.t1, Ptep.aug3.g6760.t1, Ptep.aug3.g7195.t1		Phum.transcript_PHUM136220-RA, Phum.transcript_PHUM391440-RA, Phum.transcript_PHUM463960-RA, Phum.transcript_PHUM490200-RA, Phum.transcript_PHUM499800-RA, Phum.transcript_PHUM569560-RA, Phum.transcript_PHUM586140-RA	Smar.transcript_SMAR000600-RA, Smar.transcript_SMAR002834-RA, Smar.transcript_SMAR003588-RA, Smar.transcript_SMAR003942-RA, Smar.transcript_SMAR010089-RA, Smar.transcript_SMAR012245-RA, Smar.transcript_SMAR012252-RA, Smar.transcript_SMAR012948-RA, Smar.transcript_SMAR014113-RA	Turt.mRNA_tetur01g08680, Turt.mRNA_tetur01g10750, Turt.mRNA_tetur01g10810, Turt.mRNA_tetur01g10820, Turt.mRNA_tetur01g10830, Turt.mRNA_tetur01g14170, Turt.mRNA_tetur01g14180, Turt.mRNA_tetur01g16180, Turt.mRNA_tetur02g09870, Turt.mRNA_tetur02g14551, Turt.mRNA_tetur02g15189, Turt.mRNA_tetur03g02700, Turt.mRNA_tetur04g06380, Turt.mRNA_tetur04g06770, Turt.mRNA_tetur04g09649, Turt.mRNA_tetur10g05290,…	Tcas.transcript_TC000803_001, Tcas.transcript_TC000804_001, Tcas.transcript_TC000981_001, Tcas.transcript_TC003375_001, Tcas.transcript_TC003378_001, Tcas.transcript_TC003379_001, Tcas.transcript_TC005100_001, Tcas.transcript_TC005133_001, Tcas.transcript_TC005190_001, Tcas.transcript_TC005499_001, Tcas.transcript_TC006241_001, Tcas.transcript_TC006732_001, Tcas.transcript_TC006733_001, Tcas.tran…
OG0000022	None	None	NA	NA	NA		0	0	1	0	0	399	0	0	1	17	1	1	0	0	0	1	0	1	422	8	NO			Bmor.transcript_BGIBMGA010380-RA			Drer.transcript_ENSDART00000029400, Drer.transcript_ENSDART00000039079, Drer.transcript_ENSDART00000056161, Drer.transcript_ENSDART00000064309, Drer.transcript_ENSDART00000064327, Drer.transcript_ENSDART00000067775, Drer.transcript_ENSDART00000097712, Drer.transcript_ENSDART00000098239, Drer.transcript_ENSDART00000098284, Drer.transcript_ENSDART00000098374, Drer.transcript_ENSDART00000099016, Dre…				Dmel.FBtr0088661	Hsap.transcript_ENST00000291971, Hsap.transcript_ENST00000299481, Hsap.transcript_ENST00000301295, Hsap.transcript_ENST00000312165, Hsap.transcript_ENST00000324659, Hsap.transcript_ENST00000328600, Hsap.transcript_ENST00000332836, Hsap.transcript_ENST00000342929, Hsap.transcript_ENST00000354420, Hsap.transcript_ENST00000390649, Hsap.transcript_ENST00000391773, Hsap.transcript_ENST00000391828, Hsa…	Isca.ISCW016706-RA	Lpol.rna19431					Smar.transcript_SMAR003390-RA		Tcas.transcript_TC014596_001
OG0000023	IPR011598	Domain Myc-type, basic helix-loop-helix (bHLH) domain	GO:0043565 ( sequence-specific DNA binding ), GO:0046982 ( protein heterodimerization activity ), GO:0003700 ( transcription factor activity, sequence-specific DNA binding ), GO:0005667 ( transcription factor complex ), GO:0006355 ( regulation of transcription, DNA-templated ), GO:0003677 ( DNA binding ), GO:0007399 ( nervous system development ), GO:0005634 ( nucleus ), GO:0061382 ( Malpighian t…	contraction	contraction		9	19	16	13	28	36	17	17	19	33	20	54	24	32	16	21	20	19	413	18	NO	Alyc.aculy01g03830.1, Alyc.aculy01g16880.1, Alyc.aculy01g18540.1, Alyc.aculy01g19765.1, Alyc.aculy01g29135.1, Alyc.aculy02g13390.1, Alyc.aculy02g23960.1, Alyc.aculy05g00550.1, Alyc.aculy05g02650.1	Agam.AGAP000876-RA, Agam.AGAP001448-RA, Agam.AGAP001740-RA, Agam.AGAP001741-RA, Agam.AGAP003739-RA, Agam.AGAP003756-RA, Agam.AGAP003876-RA, Agam.AGAP004299-RA, Agam.AGAP004386-RA, Agam.AGAP004907-RA, Agam.AGAP005930-RA, Agam.AGAP007124-RA, Agam.AGAP007241-RA, Agam.AGAP007822-RA, Agam.AGAP007824-RA, Agam.AGAP011985-RA, Agam.AGAP013335-RA, Agam.AGAP013406-RA, Agam.AGAP028176-RA	Bmor.transcript_BGIBMGA000497-RA, Bmor.transcript_BGIBMGA001000-RA, Bmor.transcript_BGIBMGA001001-RA, Bmor.transcript_BGIBMGA001002-RA, Bmor.transcript_BGIBMGA001148-RA, Bmor.transcript_BGIBMGA004680-RA, Bmor.transcript_BGIBMGA004895-RA, Bmor.transcript_BGIBMGA005127-RA, Bmor.transcript_BGIBMGA007303-RA, Bmor.transcript_BGIBMGA008390-RA, Bmor.transcript_BGIBMGA008476-RA, Bmor.transcript_BGIBMGA00…	Cele.Transcript_C02B8.4, Cele.Transcript_C18A3.8, Cele.Transcript_C34E10.7, Cele.Transcript_C43H6.8, Cele.Transcript_C44C10.8, Cele.Transcript_F48D6.3, Cele.Transcript_F57C12.3, Cele.Transcript_T05G5.2, Cele.Transcript_T14F9.5, Cele.Transcript_T15H9.3, Cele.Transcript_T24B8.6, Cele.Transcript_Y69A2AR.29, Cele.Transcript_ZK682.4	Cscu.CSCU003174-RA, Cscu.CSCU003897-RA, Cscu.CSCU005255-RA, Cscu.CSCU006554-RA, Cscu.CSCU007153-RA, Cscu.CSCU007739-RA, Cscu.CSCU007919-RA, Cscu.CSCU008427-RA, Cscu.CSCU008428-RA, Cscu.CSCU008432-RA, Cscu.CSCU009487-RA, Cscu.CSCU010282-RA, Cscu.CSCU010377-RA, Cscu.CSCU011921-RA, Cscu.CSCU012907-RA, Cscu.CSCU013205-RA, Cscu.CSCU014099-RA, Cscu.CSCU016580-RA, Cscu.CSCU018582-RA, Cscu.CSCU021202-RA,…	Drer.transcript_ENSDART00000002078, Drer.transcript_ENSDART00000002863, Drer.transcript_ENSDART00000007630, Drer.transcript_ENSDART00000011146, Drer.transcript_ENSDART00000011837, Drer.transcript_ENSDART00000011858, Drer.transcript_ENSDART00000018150, Drer.transcript_ENSDART00000019446, Drer.transcript_ENSDART00000020409, Drer.transcript_ENSDART00000021987, Drer.transcript_ENSDART00000043595, Dre…		Dpul.mRNA10901, Dpul.mRNA10913, Dpul.mRNA12601, Dpul.mRNA13572, Dpul.mRNA16801, Dpul.mRNA17105, Dpul.mRNA17610, Dpul.mRNA2698, Dpul.mRNA4086, Dpul.mRNA6277, Dpul.mRNA6281, Dpul.mRNA6585, Dpul.mRNA6899, Dpul.mRNA9, Dpul.mRNA9104, Dpul.mRNA9206, Dpul.mRNA9387	Dpte.g10146.t1, Dpte.g10148.t1, Dpte.g1049.t1, Dpte.g1052.t1, Dpte.g10763.t1, Dpte.g3182.t1, Dpte.g4111.t1, Dpte.g6019.t1, Dpte.g6143.t1, Dpte.g6164.t1, Dpte.g6712.t1, Dpte.g7028.t1, Dpte.g7075.t1, Dpte.g7264.t1, Dpte.g7630.t1, Dpte.g8365.t1, Dpte.g8736.t1	Dmel.FBtr0070072, Dmel.FBtr0070073, Dmel.FBtr0070074, Dmel.FBtr0070506, Dmel.FBtr0075216, Dmel.FBtr0080073, Dmel.FBtr0081081, Dmel.FBtr0081514, Dmel.FBtr0081828, Dmel.FBtr0081982, Dmel.FBtr0082435, Dmel.FBtr0087183, Dmel.FBtr0089547, Dmel.FBtr0091534, Dmel.FBtr0100130, Dmel.FBtr0331163, Dmel.FBtr0334670, Dmel.FBtr0339598, Dmel.FBtr0344011	Hsap.transcript_ENST00000231121, Hsap.transcript_ENST00000242261, Hsap.transcript_ENST00000242462, Hsap.transcript_ENST00000242994, Hsap.transcript_ENST00000246080, Hsap.transcript_ENST00000264824, Hsap.transcript_ENST00000266744, Hsap.transcript_ENST00000275461, Hsap.transcript_ENST00000294339, Hsap.transcript_ENST00000295108, Hsap.transcript_ENST00000296096, Hsap.transcript_ENST00000297142, Hsa…	Isca.ISCW001920-RA, Isca.ISCW003667-RA, Isca.ISCW003670-RA, Isca.ISCW003677-RA, Isca.ISCW003737-RA, Isca.ISCW008705-RA, Isca.ISCW009120-RA, Isca.ISCW009433-RA, Isca.ISCW009436-RA, Isca.ISCW010324-RA, Isca.ISCW011469-RA, Isca.ISCW013371-RA, Isca.ISCW014797-RA, Isca.ISCW016573-RA, Isca.ISCW018149-RA, Isca.ISCW019706-RA, Isca.ISCW020498-RA, Isca.ISCW021517-RA, Isca.ISCW024416-RA, Isca.ISCW024442-RA	Lpol.rna1076, Lpol.rna12569, Lpol.rna14861, Lpol.rna1569, Lpol.rna1717, Lpol.rna18367, Lpol.rna18689, Lpol.rna19052, Lpol.rna19229, Lpol.rna19546, Lpol.rna19718, Lpol.rna19738, Lpol.rna19918, Lpol.rna20112, Lpol.rna23095, Lpol.rna2455, Lpol.rna2456, Lpol.rna2462, Lpol.rna24778, Lpol.rna2843, Lpol.rna2919, Lpol.rna292, Lpol.rna2921, Lpol.rna2928, Lpol.rna293, Lpol.rna3002, Lpol.rna3003, Lpol.rna30…	Mocc.rna10281, Mocc.rna10897, Mocc.rna10898, Mocc.rna11246, Mocc.rna119, Mocc.rna13673, Mocc.rna13869, Mocc.rna14793, Mocc.rna14893, Mocc.rna15298, Mocc.rna15757, Mocc.rna1720, Mocc.rna17463, Mocc.rna18594, Mocc.rna2467, Mocc.rna4334, Mocc.rna4388, Mocc.rna4394, Mocc.rna4770, Mocc.rna6349, Mocc.rna6522, Mocc.rna7467, Mocc.rna7795, Mocc.rna9957	Ptep.aug3.g10383.t1, Ptep.aug3.g10385.t1, Ptep.aug3.g11084.t1, Ptep.aug3.g11118.t1, Ptep.aug3.g13882.t1, Ptep.aug3.g14166.t1, Ptep.aug3.g14287.t1, Ptep.aug3.g15676.t1, Ptep.aug3.g15677.t1, Ptep.aug3.g15679.t1, Ptep.aug3.g16700.t1, Ptep.aug3.g17210.t1, Ptep.aug3.g17665.t1, Ptep.aug3.g1926.t1, Ptep.aug3.g20076.t3, Ptep.aug3.g22432.t1, Ptep.aug3.g26660.t1, Ptep.aug3.g26750.t1, Ptep.aug3.g27205.t1, P…		Phum.transcript_PHUM038940-RA, Phum.transcript_PHUM088400-RA, Phum.transcript_PHUM129440-RA, Phum.transcript_PHUM221110-RA, Phum.transcript_PHUM221120-RA, Phum.transcript_PHUM229200-RA, Phum.transcript_PHUM294350-RA, Phum.transcript_PHUM332980-RA, Phum.transcript_PHUM396880-RA, Phum.transcript_PHUM420750-RA, Phum.transcript_PHUM498120-RA, Phum.transcript_PHUM498340-RA, Phum.transcript_PHUM501890-…	Smar.transcript_SMAR000405-RA, Smar.transcript_SMAR001477-RA, Smar.transcript_SMAR002729-RA, Smar.transcript_SMAR003412-RA, Smar.transcript_SMAR004847-RA, Smar.transcript_SMAR006456-RA, Smar.transcript_SMAR006706-RA, Smar.transcript_SMAR006921-RA, Smar.transcript_SMAR006929-RA, Smar.transcript_SMAR007908-RA, Smar.transcript_SMAR009985-RA, Smar.transcript_SMAR010329-RA, Smar.transcript_SMAR011224-…	Turt.mRNA_tetur01g11390, Turt.mRNA_tetur01g11400, Turt.mRNA_tetur01g11460, Turt.mRNA_tetur03g03150, Turt.mRNA_tetur03g08190, Turt.mRNA_tetur03g08200, Turt.mRNA_tetur04g08630, Turt.mRNA_tetur07g04030, Turt.mRNA_tetur07g05370, Turt.mRNA_tetur08g07610, Turt.mRNA_tetur09g04050, Turt.mRNA_tetur09g04370, Turt.mRNA_tetur12g03360, Turt.mRNA_tetur13g02170, Turt.mRNA_tetur17g02570, Turt.mRNA_tetur18g03540,…	Tcas.transcript_TC001473_001, Tcas.transcript_TC001576_001, Tcas.transcript_TC002349_001, Tcas.transcript_TC003170_001, Tcas.transcript_TC004726_002, Tcas.transcript_TC006222_001, Tcas.transcript_TC007594_001, Tcas.transcript_TC007598_001, Tcas.transcript_TC007725_001, Tcas.transcript_TC007826_001, Tcas.transcript_TC008433_001, Tcas.transcript_TC008437_001, Tcas.transcript_TC011336_001, Tcas.tran…
OG0000024	IPR011701	Family Major facilitator superfamily	GO:0055085 ( transmembrane transport ), GO:0008028 ( monocarboxylic acid transmembrane transporter activity ), GO:0015718 ( monocarboxylic acid transport ), GO:0016021 ( integral component of membrane ), GO:0007281 ( germ cell development ), GO:0035234 ( ectopic germ cell programmed cell death ), GO:0055085 ( transmembrane transport ), GO:0016021 ( integral component of membrane ), GO:0008028 ( m…	expansion	NA	yes	13	12	17	7	37	20	21	7	12	12	98	12	27	61	10	18	4	17	405	18	NO	Alyc.aculy01g16900.1, Alyc.aculy01g16910.1, Alyc.aculy01g16920.1, Alyc.aculy01g20620.1, Alyc.aculy01g30400.1, Alyc.aculy01g30430.1, Alyc.aculy01g34220.1, Alyc.aculy01g38410.1, Alyc.aculy02g16480.1, Alyc.aculy02g16485.1, Alyc.aculy02g16490.1, Alyc.aculy02g16500.1, Alyc.aculy02g16510.1	Agam.AGAP000040-RA, Agam.AGAP000717-RA, Agam.AGAP000718-RA, Agam.AGAP001782-RA, Agam.AGAP003205-RA, Agam.AGAP003206-RA, Agam.AGAP004384-RA, Agam.AGAP005394-RA, Agam.AGAP007601-RA, Agam.AGAP010881-RA, Agam.AGAP012371-RA, Agam.AGAP012507-RA	Bmor.transcript_BGIBMGA001007-RA, Bmor.transcript_BGIBMGA001008-RA, Bmor.transcript_BGIBMGA001143-RA, Bmor.transcript_BGIBMGA001145-RA, Bmor.transcript_BGIBMGA001691-RA, Bmor.transcript_BGIBMGA001808-RA, Bmor.transcript_BGIBMGA001809-RA, Bmor.transcript_BGIBMGA003138-RA, Bmor.transcript_BGIBMGA003572-RA, Bmor.transcript_BGIBMGA003914-RA, Bmor.transcript_BGIBMGA003915-RA, Bmor.transcript_BGIBMGA00…	Cele.Transcript_C01B4.9a, Cele.Transcript_C10E2.6, Cele.Transcript_C49F8.2, Cele.Transcript_K05B2.5b, Cele.Transcript_M03B6.2, Cele.Transcript_T02G5.12, Cele.Transcript_Y19D10A.12a	Cscu.CSCU002921-RA, Cscu.CSCU005282-RA, Cscu.CSCU008027-RA, Cscu.CSCU009792-RA, Cscu.CSCU011582-RA, Cscu.CSCU011585-RA, Cscu.CSCU011586-RA, Cscu.CSCU011592-RA, Cscu.CSCU011593-RA, Cscu.CSCU011594-RA, Cscu.CSCU011595-RA, Cscu.CSCU013174-RA, Cscu.CSCU013945-RA, Cscu.CSCU013946-RA, Cscu.CSCU016168-RA, Cscu.CSCU016169-RA, Cscu.CSCU016657-RA, Cscu.CSCU016659-RA, Cscu.CSCU017096-RA, Cscu.CSCU017630-RA,…	Drer.transcript_ENSDART00000001907, Drer.transcript_ENSDART00000009363, Drer.transcript_ENSDART00000023099, Drer.transcript_ENSDART00000038525, Drer.transcript_ENSDART00000052904, Drer.transcript_ENSDART00000073892, Drer.transcript_ENSDART00000078325, Drer.transcript_ENSDART00000078656, Drer.transcript_ENSDART00000099214, Drer.transcript_ENSDART00000125462, Drer.transcript_ENSDART00000138174, Dre…		Dpul.mRNA11075, Dpul.mRNA14, Dpul.mRNA14524, Dpul.mRNA15383, Dpul.mRNA17481, Dpul.mRNA17994, Dpul.mRNA18176, Dpul.mRNA1841, Dpul.mRNA3160, Dpul.mRNA3161, Dpul.mRNA3185, Dpul.mRNA3186, Dpul.mRNA3188, Dpul.mRNA3189, Dpul.mRNA3384, Dpul.mRNA3385, Dpul.mRNA3795, Dpul.mRNA6464, Dpul.mRNA7659, Dpul.mRNA8632, Dpul.mRNA8633	Dpte.g10680.t1, Dpte.g1077.t1, Dpte.g1315.t1, Dpte.g419.t1, Dpte.g6960.t1, Dpte.g7240.t1, Dpte.g9904.t1	Dmel.FBtr0072593, Dmel.FBtr0074682, Dmel.FBtr0074683, Dmel.FBtr0074684, Dmel.FBtr0074691, Dmel.FBtr0086072, Dmel.FBtr0086140, Dmel.FBtr0087205, Dmel.FBtr0087534, Dmel.FBtr0088032, Dmel.FBtr0339981, Dmel.FBtr0342765	Hsap.transcript_ENST00000295190, Hsap.transcript_ENST00000308009, Hsap.transcript_ENST00000308027, Hsap.transcript_ENST00000320521, Hsap.transcript_ENST00000329783, Hsap.transcript_ENST00000369779, Hsap.transcript_ENST00000371790, Hsap.transcript_ENST00000395348, Hsap.transcript_ENST00000538576, Hsap.transcript_ENST00000552432, Hsap.transcript_ENST00000580666, Hsap.transcript_ENST00000619321	Isca.ISCW000513-RA, Isca.ISCW000742-RA, Isca.ISCW000759-RA, Isca.ISCW000779-RA, Isca.ISCW001101-RA, Isca.ISCW001275-RA, Isca.ISCW001278-RA, Isca.ISCW001403-RA, Isca.ISCW001678-RA, Isca.ISCW002274-RA, Isca.ISCW002448-RA, Isca.ISCW002989-RA, Isca.ISCW002992-RA, Isca.ISCW003169-RA, Isca.ISCW003170-RA, Isca.ISCW004453-RA, Isca.ISCW004516-RA, Isca.ISCW004564-RA, Isca.ISCW005357-RA, Isca.ISCW005358-RA,…	Lpol.rna10660, Lpol.rna1448, Lpol.rna19244, Lpol.rna20604, Lpol.rna21879, Lpol.rna22603, Lpol.rna22614, Lpol.rna23304, Lpol.rna23312, Lpol.rna2794, Lpol.rna2968, Lpol.rna6645	Mocc.rna10199, Mocc.rna10200, Mocc.rna10201, Mocc.rna11223, Mocc.rna12091, Mocc.rna12092, Mocc.rna13656, Mocc.rna14301, Mocc.rna14428, Mocc.rna14455, Mocc.rna14662, Mocc.rna16081, Mocc.rna16082, Mocc.rna17699, Mocc.rna17844, Mocc.rna17845, Mocc.rna18089, Mocc.rna2337, Mocc.rna2417, Mocc.rna2855, Mocc.rna3642, Mocc.rna3788, Mocc.rna3918, Mocc.rna5856, Mocc.rna7261, Mocc.rna8425, Mocc.rna8575	Ptep.aug3.g10843.t1, Ptep.aug3.g10941.t1, Ptep.aug3.g10942.t1, Ptep.aug3.g11199.t1, Ptep.aug3.g11616.t1, Ptep.aug3.g12390.t1, Ptep.aug3.g12391.t1, Ptep.aug3.g12392.t1, Ptep.aug3.g15175.t1, Ptep.aug3.g15177.t1, Ptep.aug3.g15262.t1, Ptep.aug3.g17461.t1, Ptep.aug3.g18121.t1, Ptep.aug3.g19080.t1, Ptep.aug3.g19983.t1, Ptep.aug3.g20816.t1, Ptep.aug3.g20880.t1, Ptep.aug3.g21556.t1, Ptep.aug3.g21557.t1, …		Phum.transcript_PHUM130210-RA, Phum.transcript_PHUM160360-RA, Phum.transcript_PHUM160720-RA, Phum.transcript_PHUM204100-RA, Phum.transcript_PHUM278220-RA, Phum.transcript_PHUM433340-RA, Phum.transcript_PHUM517360-RA, Phum.transcript_PHUM517370-RA, Phum.transcript_PHUM517380-RA, Phum.transcript_PHUM517490-RA	Smar.transcript_SMAR000216-RA, Smar.transcript_SMAR000224-RA, Smar.transcript_SMAR000494-RA, Smar.transcript_SMAR002387-RA, Smar.transcript_SMAR002454-RA, Smar.transcript_SMAR002825-RA, Smar.transcript_SMAR008581-RA, Smar.transcript_SMAR009259-RA, Smar.transcript_SMAR009263-RA, Smar.transcript_SMAR010228-RA, Smar.transcript_SMAR010652-RA, Smar.transcript_SMAR011466-RA, Smar.transcript_SMAR011467-…	Turt.mRNA_tetur02g10380, Turt.mRNA_tetur06g05470, Turt.mRNA_tetur11g03580, Turt.mRNA_tetur29g00790	Tcas.transcript_TC000459_001, Tcas.transcript_TC000460_001, Tcas.transcript_TC001278_001, Tcas.transcript_TC005811_001, Tcas.transcript_TC006337_001, Tcas.transcript_TC007067_001, Tcas.transcript_TC007068_001, Tcas.transcript_TC007071_001, Tcas.transcript_TC007072_001, Tcas.transcript_TC008428_001, Tcas.transcript_TC008430_001, Tcas.transcript_TC010858_001, Tcas.transcript_TC014220_001, Tcas.tran…
OG0000025	IPR001356	Domain Homeobox domain	GO:0043565 ( sequence-specific DNA binding ), GO:0006355 ( regulation of transcription, DNA-templated ), GO:0006355 ( regulation of transcription, DNA-templated ), GO:0043565 ( sequence-specific DNA binding ), GO:0043565 ( sequence-specific DNA binding ), GO:0006355 ( regulation of transcription, DNA-templated ), GO:0006355 ( regulation of transcription, DNA-templated ), GO:0043565 ( sequence-spe…	contraction	contraction		12	16	21	13	28	40	16	15	19	35	16	44	17	30	19	21	19	18	399	18	NO	Alyc.aculy01g00690.1, Alyc.aculy01g12620.1, Alyc.aculy01g14690.1, Alyc.aculy01g17900.1, Alyc.aculy01g34340.1, Alyc.aculy01g36650.1, Alyc.aculy02g25540.1, Alyc.aculy02g27970.1, Alyc.aculy03g03420.1, Alyc.aculy03g06040.1, Alyc.aculy03g09000.1, Alyc.aculy04g02440.1	Agam.AGAP000190-RA, Agam.AGAP000215-RA, Agam.AGAP001483-RA, Agam.AGAP001495-RA, Agam.AGAP001593-RA, Agam.AGAP002487-RA, Agam.AGAP003574-RA, Agam.AGAP005096-RA, Agam.AGAP005099-RA, Agam.AGAP005311-RA, Agam.AGAP007985-RA, Agam.AGAP008868-RA, Agam.AGAP009293-RA, Agam.AGAP011143-RA, Agam.AGAP012303-RA, Agam.AGAP012501-RA	Bmor.transcript_BGIBMGA000211-RA, Bmor.transcript_BGIBMGA001200-RA, Bmor.transcript_BGIBMGA004601-RA, Bmor.transcript_BGIBMGA005619-RA, Bmor.transcript_BGIBMGA006006-RA, Bmor.transcript_BGIBMGA006007-RA, Bmor.transcript_BGIBMGA006008-RA, Bmor.transcript_BGIBMGA007471-RA, Bmor.transcript_BGIBMGA007802-RA, Bmor.transcript_BGIBMGA007917-RA, Bmor.transcript_BGIBMGA008456-RA, Bmor.transcript_BGIBMGA00…	Cele.Transcript_B0564.10b, Cele.Transcript_C09G12.1, Cele.Transcript_C37E2.4, Cele.Transcript_C37E2.5a.1, Cele.Transcript_D1007.1, Cele.Transcript_F26C11.2, Cele.Transcript_F58E6.10b, Cele.Transcript_R08B4.2, Cele.Transcript_T13C5.4, Cele.Transcript_W03A3.1, Cele.Transcript_Y113G7A.6a, Cele.Transcript_ZK265.4a, Cele.Transcript_ZK993.1a	Cscu.CSCU000609-RA, Cscu.CSCU002348-RA, Cscu.CSCU004322-RA, Cscu.CSCU004685-RA, Cscu.CSCU005066-RA, Cscu.CSCU006574-RA, Cscu.CSCU007998-RA, Cscu.CSCU008374-RA, Cscu.CSCU012569-RA, Cscu.CSCU012570-RA, Cscu.CSCU013732-RA, Cscu.CSCU014058-RA, Cscu.CSCU015097-RA, Cscu.CSCU015098-RA, Cscu.CSCU015099-RA, Cscu.CSCU015671-RA, Cscu.CSCU016934-RA, Cscu.CSCU018539-RA, Cscu.CSCU020591-RA, Cscu.CSCU020592-RA,…	Drer.transcript_ENSDART00000002384, Drer.transcript_ENSDART00000006538, Drer.transcript_ENSDART00000008816, Drer.transcript_ENSDART00000017173, Drer.transcript_ENSDART00000026693, Drer.transcript_ENSDART00000027268, Drer.transcript_ENSDART00000030448, Drer.transcript_ENSDART00000036630, Drer.transcript_ENSDART00000037879, Drer.transcript_ENSDART00000052569, Drer.transcript_ENSDART00000055009, Dre…		Dpul.mRNA100, Dpul.mRNA11785, Dpul.mRNA12054, Dpul.mRNA12059, Dpul.mRNA12234, Dpul.mRNA15719, Dpul.mRNA2599, Dpul.mRNA2985, Dpul.mRNA5269, Dpul.mRNA5282, Dpul.mRNA5462, Dpul.mRNA6947, Dpul.mRNA7373, Dpul.mRNA773, Dpul.mRNA8404, Dpul.mRNA9881	Dpte.g10659.t1, Dpte.g1098.t1, Dpte.g1099.t1, Dpte.g11624.t1, Dpte.g1308.t1, Dpte.g1603.t1, Dpte.g3073.t1, Dpte.g3731.t1, Dpte.g5050.t1, Dpte.g5253.t1, Dpte.g5255.t1, Dpte.g5256.t1, Dpte.g7719.t1, Dpte.g7783.t1, Dpte.g9500.t1	Dmel.FBtr0071224, Dmel.FBtr0071556, Dmel.FBtr0071979, Dmel.FBtr0072224, Dmel.FBtr0074461, Dmel.FBtr0078053, Dmel.FBtr0078070, Dmel.FBtr0083564, Dmel.FBtr0112592, Dmel.FBtr0302391, Dmel.FBtr0330094, Dmel.FBtr0331737, Dmel.FBtr0340420, Dmel.FBtr0340495, Dmel.FBtr0340627, Dmel.FBtr0342783, Dmel.FBtr0342800, Dmel.FBtr0343015, Dmel.FBtr0343221	Hsap.transcript_ENST00000086933, Hsap.transcript_ENST00000221996, Hsap.transcript_ENST00000226382, Hsap.transcript_ENST00000238558, Hsap.transcript_ENST00000239461, Hsap.transcript_ENST00000261980, Hsap.transcript_ENST00000282549, Hsap.transcript_ENST00000295934, Hsap.transcript_ENST00000298231, Hsap.transcript_ENST00000306422, Hsap.transcript_ENST00000306732, Hsap.transcript_ENST00000308304, Hsa…	Isca.ISCW002341-RA, Isca.ISCW006445-RA, Isca.ISCW006446-RA, Isca.ISCW008990-RA, Isca.ISCW009634-RA, Isca.ISCW012805-RA, Isca.ISCW013772-RA, Isca.ISCW014108-RA, Isca.ISCW016208-RA, Isca.ISCW016210-RA, Isca.ISCW016444-RA, Isca.ISCW017713-RA, Isca.ISCW020265-RA, Isca.ISCW021207-RA, Isca.ISCW021525-RA, Isca.ISCW024566-RA	Lpol.rna10684, Lpol.rna11521, Lpol.rna11939, Lpol.rna11961, Lpol.rna1217, Lpol.rna12901, Lpol.rna12929, Lpol.rna1365, Lpol.rna14263, Lpol.rna15416, Lpol.rna1771, Lpol.rna18257, Lpol.rna18399, Lpol.rna18484, Lpol.rna1863, Lpol.rna18749, Lpol.rna20254, Lpol.rna20603, Lpol.rna20790, Lpol.rna21653, Lpol.rna21978, Lpol.rna21999, Lpol.rna22704, Lpol.rna23162, Lpol.rna23266, Lpol.rna24483, Lpol.rna24817…	Mocc.rna10241, Mocc.rna11313, Mocc.rna11677, Mocc.rna13150, Mocc.rna13845, Mocc.rna13848, Mocc.rna14550, Mocc.rna14552, Mocc.rna15116, Mocc.rna1609, Mocc.rna16521, Mocc.rna17392, Mocc.rna17980, Mocc.rna6594, Mocc.rna7475, Mocc.rna9172, Mocc.rna9173	Ptep.aug3.g10202.t2, Ptep.aug3.g1240.t1, Ptep.aug3.g12810.t1, Ptep.aug3.g12968.t1, Ptep.aug3.g13822.t1, Ptep.aug3.g13826.t1, Ptep.aug3.g14050.t1, Ptep.aug3.g14368.t1, Ptep.aug3.g16467.t1, Ptep.aug3.g17145.t1, Ptep.aug3.g20598.t1, Ptep.aug3.g21034.t1, Ptep.aug3.g2184.t1, Ptep.aug3.g22155.t1, Ptep.aug3.g24194.t1, Ptep.aug3.g25875.t1, Ptep.aug3.g25936.t1, Ptep.aug3.g26020.t1, Ptep.aug3.g27186.t1, Pt…		Phum.transcript_PHUM093490-RA, Phum.transcript_PHUM093500-RA, Phum.transcript_PHUM121380-RA, Phum.transcript_PHUM121700-RA, Phum.transcript_PHUM121710-RA, Phum.transcript_PHUM165720-RA, Phum.transcript_PHUM171660-RA, Phum.transcript_PHUM182350-RA, Phum.transcript_PHUM189970-RA, Phum.transcript_PHUM230130-RA, Phum.transcript_PHUM230750-RA, Phum.transcript_PHUM308960-RA, Phum.transcript_PHUM363310-…	Smar.transcript_SMAR003035-RA, Smar.transcript_SMAR003036-RA, Smar.transcript_SMAR003736-RA, Smar.transcript_SMAR004529-RA, Smar.transcript_SMAR004854-RA, Smar.transcript_SMAR006261-RA, Smar.transcript_SMAR006320-RA, Smar.transcript_SMAR006755-RA, Smar.transcript_SMAR006775-RA, Smar.transcript_SMAR007945-RA, Smar.transcript_SMAR008386-RA, Smar.transcript_SMAR009619-RA, Smar.transcript_SMAR009696-…	Turt.mRNA_tetur02g06020, Turt.mRNA_tetur04g00320, Turt.mRNA_tetur04g05170, Turt.mRNA_tetur06g01030, Turt.mRNA_tetur07g04480, Turt.mRNA_tetur07g07400, Turt.mRNA_tetur10g03670, Turt.mRNA_tetur13g92988, Turt.mRNA_tetur14g00760, Turt.mRNA_tetur18g02470, Turt.mRNA_tetur18g02480, Turt.mRNA_tetur18g03160, Turt.mRNA_tetur19g02530, Turt.mRNA_tetur21g02710, Turt.mRNA_tetur27g00570, Turt.mRNA_tetur27g01250,…	Tcas.transcript_TC000527_001, Tcas.transcript_TC001726_002, Tcas.transcript_TC003354_001, Tcas.transcript_TC003355_002, Tcas.transcript_TC005600_001, Tcas.transcript_TC005661_001, Tcas.transcript_TC006110_001, Tcas.transcript_TC007133_001, Tcas.transcript_TC007335_001, Tcas.transcript_TC008926_001, Tcas.transcript_TC009911_001, Tcas.transcript_TC011539_001, Tcas.transcript_TC013309_001, Tcas.tran…
OG0000026	IPR013162;IPR013106	Domain CD80-like, immunoglobulin C2-set;Domain Immunoglobulin V-set domain	GO:0046331 ( lateral inhibition ), GO:0008045 ( motor neuron axon guidance ), GO:0019233 ( sensory perception of pain ), GO:0005575 ( cellular_component ), GO:0008150 ( biological_process ), GO:0003674 ( molecular_function )	contraction	contraction		4	10	23	0	39	0	21	15	8	1	57	83	19	53	10	10	36	9	398	16	NO	Alyc.aculy01g35960.1, Alyc.aculy01g36710.1, Alyc.aculy02g00630.1, Alyc.aculy04g07970.1	Agam.AGAP001410-RA, Agam.AGAP001674-RA, Agam.AGAP001824-RA, Agam.AGAP001925-RA, Agam.AGAP002104-RA, Agam.AGAP003305-RA, Agam.AGAP004230-RA, Agam.AGAP008320-RA, Agam.AGAP009596-RA, Agam.AGAP009683-RA	Bmor.transcript_BGIBMGA001045-RA, Bmor.transcript_BGIBMGA001110-RA, Bmor.transcript_BGIBMGA001111-RA, Bmor.transcript_BGIBMGA002119-RA, Bmor.transcript_BGIBMGA003794-RA, Bmor.transcript_BGIBMGA003795-RA, Bmor.transcript_BGIBMGA003796-RA, Bmor.transcript_BGIBMGA003797-RA, Bmor.transcript_BGIBMGA004750-RA, Bmor.transcript_BGIBMGA004751-RA, Bmor.transcript_BGIBMGA004752-RA, Bmor.transcript_BGIBMGA00…		Cscu.CSCU000549-RA, Cscu.CSCU000550-RA, Cscu.CSCU000983-RA, Cscu.CSCU000984-RA, Cscu.CSCU000985-RA, Cscu.CSCU004285-RA, Cscu.CSCU004286-RA, Cscu.CSCU007214-RA, Cscu.CSCU007215-RA, Cscu.CSCU007216-RA, Cscu.CSCU007217-RA, Cscu.CSCU007220-RA, Cscu.CSCU007221-RA, Cscu.CSCU007222-RA, Cscu.CSCU008511-RA, Cscu.CSCU008512-RA, Cscu.CSCU008907-RA, Cscu.CSCU008908-RA, Cscu.CSCU012077-RA, Cscu.CSCU012078-RA,…			Dpul.mRNA10803, Dpul.mRNA1385, Dpul.mRNA1386, Dpul.mRNA1387, Dpul.mRNA14945, Dpul.mRNA14946, Dpul.mRNA14951, Dpul.mRNA14954, Dpul.mRNA15956, Dpul.mRNA15958, Dpul.mRNA17346, Dpul.mRNA17347, Dpul.mRNA22, Dpul.mRNA24, Dpul.mRNA4362, Dpul.mRNA4758, Dpul.mRNA6284, Dpul.mRNA6287, Dpul.mRNA6291, Dpul.mRNA6292, Dpul.mRNA6751	Dpte.g11240.t1, Dpte.g11241.t1, Dpte.g11583.t1, Dpte.g11586.t1, Dpte.g11793.t1, Dpte.g1366.t1, Dpte.g3023.t1, Dpte.g3029.t1, Dpte.g3031.t1, Dpte.g3674.t1, Dpte.g7228.t1, Dpte.g8953.t1, Dpte.g9499.t1, Dpte.g9705.t1, Dpte.g9783.t1	Dmel.FBtr0082170, Dmel.FBtr0110806, Dmel.FBtr0110808, Dmel.FBtr0112775, Dmel.FBtr0303259, Dmel.FBtr0309179, Dmel.FBtr0330239, Dmel.FBtr0345431	Hsap.transcript_ENST00000340027	Isca.ISCW000450-RA, Isca.ISCW000453-RA, Isca.ISCW001271-RA, Isca.ISCW001390-RA, Isca.ISCW002090-RA, Isca.ISCW002635-RA, Isca.ISCW002959-RA, Isca.ISCW003447-RA, Isca.ISCW003563-RA, Isca.ISCW004086-RA, Isca.ISCW005529-RA, Isca.ISCW006765-RA, Isca.ISCW006801-RA, Isca.ISCW006817-RA, Isca.ISCW007282-RA, Isca.ISCW007603-RA, Isca.ISCW007919-RA, Isca.ISCW007928-RA, Isca.ISCW008005-RA, Isca.ISCW009659-RA,…	Lpol.rna10040, Lpol.rna10427, Lpol.rna11024, Lpol.rna11115, Lpol.rna11490, Lpol.rna1157, Lpol.rna11898, Lpol.rna1213, Lpol.rna1214, Lpol.rna1215, Lpol.rna1216, Lpol.rna12778, Lpol.rna135, Lpol.rna13538, Lpol.rna136, Lpol.rna138, Lpol.rna14373, Lpol.rna1441, Lpol.rna14624, Lpol.rna14625, Lpol.rna15059, Lpol.rna15135, Lpol.rna15274, Lpol.rna16374, Lpol.rna16978, Lpol.rna17855, Lpol.rna17973, Lpol.r…	Mocc.rna10490, Mocc.rna10561, Mocc.rna10577, Mocc.rna10793, Mocc.rna12575, Mocc.rna12920, Mocc.rna1320, Mocc.rna13879, Mocc.rna1446, Mocc.rna1451, Mocc.rna15632, Mocc.rna15634, Mocc.rna16620, Mocc.rna16879, Mocc.rna288, Mocc.rna5086, Mocc.rna7155, Mocc.rna7156, Mocc.rna8758	Ptep.aug3.g11102.t1, Ptep.aug3.g1348.t1, Ptep.aug3.g14565.t1, Ptep.aug3.g14660.t1, Ptep.aug3.g15010.t1, Ptep.aug3.g15857.t1, Ptep.aug3.g15961.t1, Ptep.aug3.g16340.t1, Ptep.aug3.g16437.t1, Ptep.aug3.g18011.t1, Ptep.aug3.g18780.t1, Ptep.aug3.g18816.t1, Ptep.aug3.g19610.t1, Ptep.aug3.g21399.t1, Ptep.aug3.g21446.t1, Ptep.aug3.g21679.t1, Ptep.aug3.g21957.t1, Ptep.aug3.g22710.t1, Ptep.aug3.g23019.t1, P…		Phum.transcript_PHUM004220-RA, Phum.transcript_PHUM004330-RA, Phum.transcript_PHUM109400-RA, Phum.transcript_PHUM119370-RA, Phum.transcript_PHUM238090-RA, Phum.transcript_PHUM311500-RA, Phum.transcript_PHUM311820-RA, Phum.transcript_PHUM312550-RA, Phum.transcript_PHUM313690-RA, Phum.transcript_PHUM513440-RA	Smar.transcript_SMAR005092-RA, Smar.transcript_SMAR005096-RA, Smar.transcript_SMAR006412-RA, Smar.transcript_SMAR008233-RA, Smar.transcript_SMAR008234-RA, Smar.transcript_SMAR009760-RA, Smar.transcript_SMAR009772-RA, Smar.transcript_SMAR009796-RA, Smar.transcript_SMAR014111-RA, Smar.transcript_SMAR014365-RA	Turt.mRNA_tetur01g04120, Turt.mRNA_tetur01g04600, Turt.mRNA_tetur01g04630, Turt.mRNA_tetur01g04670, Turt.mRNA_tetur01g07530, Turt.mRNA_tetur01g15830, Turt.mRNA_tetur01g92342, Turt.mRNA_tetur01g92390, Turt.mRNA_tetur02g04370, Turt.mRNA_tetur02g04380, Turt.mRNA_tetur02g04390, Turt.mRNA_tetur03g02380, Turt.mRNA_tetur05g05920, Turt.mRNA_tetur05g05930, Turt.mRNA_tetur06g04770, Turt.mRNA_tetur06g05200,…	Tcas.transcript_TC009058_001, Tcas.transcript_TC009766_003, Tcas.transcript_TC009768_001, Tcas.transcript_TC031184_001, Tcas.transcript_TC033672_001, Tcas.transcript_TC033687_001, Tcas.transcript_TC033797_001, Tcas.transcript_TC033798_001, Tcas.transcript_TC033843_001
OG0000027	IPR002656	Domain Acyltransferase 3	GO:0016747 ( transferase activity, transferring acyl groups other than amino-acyl groups ), GO:0016747 ( transferase activity, transferring acyl groups other than amino-acyl groups ), GO:0016747 ( transferase activity, transferring acyl groups other than amino-acyl groups ), GO:0022416 ( chaeta development ), GO:0035220 ( wing disc development ), GO:0016747 ( transferase activity, transferring ac…	contraction	NA		12	8	10	15	60	1	20	14	14	0	58	28	28	61	14	13	18	22	396	17	NO	Alyc.aculy01g13770.1, Alyc.aculy01g21680.1, Alyc.aculy01g32550.1, Alyc.aculy01g33090.1, Alyc.aculy01g38890.1, Alyc.aculy02g02990.1, Alyc.aculy02g10230.1, Alyc.aculy02g10450.1, Alyc.aculy02g11880.1, Alyc.aculy02g27190.1, Alyc.aculy04g01220.1, Alyc.aculy04g04080.1	Agam.AGAP000520-RA, Agam.AGAP000521-RA, Agam.AGAP000535-RA, Agam.AGAP000629-RA, Agam.AGAP001485-RA, Agam.AGAP003010-RA, Agam.AGAP003499-RA, Agam.AGAP013491-RA	Bmor.transcript_BGIBMGA000858-RA, Bmor.transcript_BGIBMGA000859-RA, Bmor.transcript_BGIBMGA001288-RA, Bmor.transcript_BGIBMGA001289-RA, Bmor.transcript_BGIBMGA005017-RA, Bmor.transcript_BGIBMGA005019-RA, Bmor.transcript_BGIBMGA007617-RA, Bmor.transcript_BGIBMGA010530-RA, Bmor.transcript_BGIBMGA010531-RA, Bmor.transcript_BGIBMGA014222-RA	Cele.Transcript_C06B3.2, Cele.Transcript_C08B11.4.1, Cele.Transcript_C31A11.1, Cele.Transcript_C31A11.5, Cele.Transcript_C31A11.7, Cele.Transcript_F09B9.1a, Cele.Transcript_F36G9.12, Cele.Transcript_F52F10.3, Cele.Transcript_F52F10.4a, Cele.Transcript_F56F3.2a, Cele.Transcript_R02C2.3a, Cele.Transcript_T14D7.2, Cele.Transcript_T27E4.6a, Cele.Transcript_W06G6.1, Cele.Transcript_Y39H10A.2b	Cscu.CSCU003132-RA, Cscu.CSCU003320-RA, Cscu.CSCU003323-RA, Cscu.CSCU003324-RA, Cscu.CSCU003325-RA, Cscu.CSCU003326-RA, Cscu.CSCU003327-RA, Cscu.CSCU003490-RA, Cscu.CSCU003491-RA, Cscu.CSCU004411-RA, Cscu.CSCU004413-RA, Cscu.CSCU004416-RA, Cscu.CSCU004984-RA, Cscu.CSCU006468-RA, Cscu.CSCU006469-RA, Cscu.CSCU006471-RA, Cscu.CSCU006472-RA, Cscu.CSCU006473-RA, Cscu.CSCU006474-RA, Cscu.CSCU006475-RA,…	Drer.transcript_ENSDART00000136449		Dpul.mRNA14840, Dpul.mRNA14841, Dpul.mRNA17088, Dpul.mRNA17090, Dpul.mRNA17887, Dpul.mRNA17888, Dpul.mRNA1894, Dpul.mRNA1900, Dpul.mRNA1902, Dpul.mRNA1905, Dpul.mRNA2057, Dpul.mRNA2066, Dpul.mRNA2073, Dpul.mRNA3893, Dpul.mRNA3898, Dpul.mRNA7018, Dpul.mRNA7042, Dpul.mRNA7043, Dpul.mRNA7045, Dpul.mRNA9446	Dpte.g10063.t1, Dpte.g3528.t1, Dpte.g353.t1, Dpte.g418.t1, Dpte.g4264.t1, Dpte.g4904.t1, Dpte.g4905.t1, Dpte.g4967.t1, Dpte.g5128.t1, Dpte.g6111.t1, Dpte.g6875.t1, Dpte.g711.t1, Dpte.g8240.t1, Dpte.g9818.t1	Dmel.FBtr0071403, Dmel.FBtr0073725, Dmel.FBtr0074729, Dmel.FBtr0074730, Dmel.FBtr0074769, Dmel.FBtr0084486, Dmel.FBtr0100009, Dmel.FBtr0273191, Dmel.FBtr0299796, Dmel.FBtr0300673, Dmel.FBtr0304611, Dmel.FBtr0304612, Dmel.FBtr0339193, Dmel.FBtr0339748		Isca.ISCW000042-RA, Isca.ISCW000045-RA, Isca.ISCW000236-RA, Isca.ISCW000588-RA, Isca.ISCW000794-RA, Isca.ISCW001445-RA, Isca.ISCW002044-RA, Isca.ISCW002045-RA, Isca.ISCW002046-RA, Isca.ISCW002047-RA, Isca.ISCW002049-RA, Isca.ISCW002267-RA, Isca.ISCW003040-RA, Isca.ISCW003041-RA, Isca.ISCW003042-RA, Isca.ISCW003617-RA, Isca.ISCW003618-RA, Isca.ISCW003963-RA, Isca.ISCW004367-RA, Isca.ISCW004368-RA,…	Lpol.rna10847, Lpol.rna12684, Lpol.rna14030, Lpol.rna14835, Lpol.rna16736, Lpol.rna17184, Lpol.rna17295, Lpol.rna17296, Lpol.rna17974, Lpol.rna19415, Lpol.rna1944, Lpol.rna20300, Lpol.rna4470, Lpol.rna4531, Lpol.rna4532, Lpol.rna4535, Lpol.rna4817, Lpol.rna5997, Lpol.rna663, Lpol.rna6635, Lpol.rna6636, Lpol.rna6715, Lpol.rna7256, Lpol.rna7257, Lpol.rna8050, Lpol.rna8051, Lpol.rna8085, Lpol.rna8171	Mocc.rna10253, Mocc.rna10941, Mocc.rna11245, Mocc.rna11354, Mocc.rna11355, Mocc.rna11505, Mocc.rna12081, Mocc.rna12082, Mocc.rna121, Mocc.rna12693, Mocc.rna14990, Mocc.rna15304, Mocc.rna15636, Mocc.rna1591, Mocc.rna16680, Mocc.rna16820, Mocc.rna17821, Mocc.rna2688, Mocc.rna3452, Mocc.rna4636, Mocc.rna7513, Mocc.rna7724, Mocc.rna7725, Mocc.rna8409, Mocc.rna8410, Mocc.rna8865, Mocc.rna8870, Mocc.rn…	Ptep.aug3.g1012.t2, Ptep.aug3.g1014.t1, Ptep.aug3.g1015.t1, Ptep.aug3.g1017.t1, Ptep.aug3.g1023.t1, Ptep.aug3.g1032.t1, Ptep.aug3.g10903.t1, Ptep.aug3.g11352.t2, Ptep.aug3.g11862.t1, Ptep.aug3.g11863.t1, Ptep.aug3.g12106.t1, Ptep.aug3.g12107.t1, Ptep.aug3.g12108.t1, Ptep.aug3.g12484.t1, Ptep.aug3.g12950.t1, Ptep.aug3.g13820.t1, Ptep.aug3.g13887.t1, Ptep.aug3.g13889.t1, Ptep.aug3.g14002.t1, Ptep.a…		Phum.transcript_PHUM206400-RA, Phum.transcript_PHUM210560-RA, Phum.transcript_PHUM210570-RA, Phum.transcript_PHUM216760-RA, Phum.transcript_PHUM216880-RA, Phum.transcript_PHUM216890-RA, Phum.transcript_PHUM216900-RA, Phum.transcript_PHUM216910-RA, Phum.transcript_PHUM260880-RA, Phum.transcript_PHUM431730-RA, Phum.transcript_PHUM435310-RA, Phum.transcript_PHUM435820-RA, Phum.transcript_PHUM481880-…	Smar.transcript_SMAR001351-RA, Smar.transcript_SMAR001398-RA, Smar.transcript_SMAR002297-RA, Smar.transcript_SMAR003921-RA, Smar.transcript_SMAR004882-RA, Smar.transcript_SMAR005605-RA, Smar.transcript_SMAR008055-RA, Smar.transcript_SMAR009505-RA, Smar.transcript_SMAR010243-RA, Smar.transcript_SMAR013492-RA, Smar.transcript_SMAR013879-RA, Smar.transcript_SMAR014226-RA, Smar.transcript_SMAR015720-…	Turt.mRNA_tetur01g10200, Turt.mRNA_tetur03g06100, Turt.mRNA_tetur03g06700, Turt.mRNA_tetur06g01830, Turt.mRNA_tetur08g04420, Turt.mRNA_tetur09g02900, Turt.mRNA_tetur09g06340, Turt.mRNA_tetur11g01300, Turt.mRNA_tetur11g01310, Turt.mRNA_tetur12g03640, Turt.mRNA_tetur15g02110, Turt.mRNA_tetur16g03010, Turt.mRNA_tetur26g00220, Turt.mRNA_tetur29g00380, Turt.mRNA_tetur29g00390, Turt.mRNA_tetur37g00280,…	Tcas.transcript_TC004826_001, Tcas.transcript_TC007090_001, Tcas.transcript_TC007127_001, Tcas.transcript_TC007433_001, Tcas.transcript_TC007784_001, Tcas.transcript_TC009917_001, Tcas.transcript_TC010604_001, Tcas.transcript_TC011151_001, Tcas.transcript_TC014422_001, Tcas.transcript_TC015464_001, Tcas.transcript_TC031341_001, Tcas.transcript_TC031342_001, Tcas.transcript_TC031628_001, Tcas.tran…
OG0000028	None	None	GO:0030246 ( carbohydrate binding ), GO:0048085 ( adult chitin-containing cuticle pigmentation ), GO:0005534 ( galactose binding ), GO:0042806 ( fucose binding ), GO:0005537 ( mannose binding ), GO:0030246 ( carbohydrate binding ), GO:0005534 ( galactose binding ), GO:0030246 ( carbohydrate binding ), GO:0005534 ( galactose binding ), GO:0030246 ( carbohydrate binding ), GO:0032504 ( multicellula…	NA	NA		2	20	8	34	7	155	17	2	30	65	1	15	3	11	3	17	0	3	393	17	NO	Alyc.aculy02g01410.1, Alyc.aculy02g10980.1	Agam.AGAP000871-RA, Agam.AGAP002910-RA, Agam.AGAP002911-RA, Agam.AGAP002912-RA, Agam.AGAP004810-RA, Agam.AGAP004811-RA, Agam.AGAP005332-RA, Agam.AGAP005334-RA, Agam.AGAP005335-RA, Agam.AGAP006267-RA, Agam.AGAP007407-RA, Agam.AGAP007408-RA, Agam.AGAP007409-RA, Agam.AGAP007410-RA, Agam.AGAP007411-RA, Agam.AGAP007412-RA, Agam.AGAP010707-RA, Agam.AGAP010708-RA, Agam.AGAP010709-RA, Agam.AGAP013382-RA	Bmor.transcript_BGIBMGA002288-RA, Bmor.transcript_BGIBMGA002289-RA, Bmor.transcript_BGIBMGA003450-RA, Bmor.transcript_BGIBMGA006623-RA, Bmor.transcript_BGIBMGA006768-RA, Bmor.transcript_BGIBMGA008247-RA, Bmor.transcript_BGIBMGA011634-RA, Bmor.transcript_BGIBMGA011960-RA	Cele.Transcript_B0218.6a, Cele.Transcript_B0218.8, Cele.Transcript_B0432.12, Cele.Transcript_C07A9.1, Cele.Transcript_C09D1.2, Cele.Transcript_C14A6.1, Cele.Transcript_C25G4.17, Cele.Transcript_C30H6.1c, Cele.Transcript_C30H6.4, Cele.Transcript_C49C3.13, Cele.Transcript_C54D1.2, Cele.Transcript_F08G5.7, Cele.Transcript_F25B4.9, Cele.Transcript_F33E2.3, Cele.Transcript_F35C5.8.1, Cele.Transcript_F…	Cscu.CSCU002541-RA, Cscu.CSCU002544-RA, Cscu.CSCU002545-RA, Cscu.CSCU011477-RA, Cscu.CSCU012487-RA, Cscu.CSCU014632-RA, Cscu.CSCU023239-RA	Drer.transcript_ENSDART00000012522, Drer.transcript_ENSDART00000017467, Drer.transcript_ENSDART00000025019, Drer.transcript_ENSDART00000026135, Drer.transcript_ENSDART00000031356, Drer.transcript_ENSDART00000032177, Drer.transcript_ENSDART00000035685, Drer.transcript_ENSDART00000037303, Drer.transcript_ENSDART00000039316, Drer.transcript_ENSDART00000040733, Drer.transcript_ENSDART00000053213, Dre…		Dpul.mRNA10280, Dpul.mRNA10602, Dpul.mRNA10604, Dpul.mRNA11345, Dpul.mRNA12457, Dpul.mRNA13083, Dpul.mRNA15419, Dpul.mRNA16107, Dpul.mRNA17035, Dpul.mRNA18138, Dpul.mRNA188, Dpul.mRNA3428, Dpul.mRNA4905, Dpul.mRNA503, Dpul.mRNA5900, Dpul.mRNA5958, Dpul.mRNA7272	Dpte.g3219.t1, Dpte.g4968.t1	Dmel.FBtr0072659, Dmel.FBtr0077469, Dmel.FBtr0077539, Dmel.FBtr0077998, Dmel.FBtr0077999, Dmel.FBtr0079442, Dmel.FBtr0079715, Dmel.FBtr0079716, Dmel.FBtr0079816, Dmel.FBtr0085988, Dmel.FBtr0086005, Dmel.FBtr0086752, Dmel.FBtr0088476, Dmel.FBtr0100088, Dmel.FBtr0113317, Dmel.FBtr0299675, Dmel.FBtr0301706, Dmel.FBtr0302360, Dmel.FBtr0302361, Dmel.FBtr0302362, Dmel.FBtr0304637, Dmel.FBtr0304639, Dme…	Hsap.transcript_ENST00000228434, Hsap.transcript_ENST00000228438, Hsap.transcript_ENST00000229332, Hsap.transcript_ENST00000229402, Hsap.transcript_ENST00000233735, Hsap.transcript_ENST00000254868, Hsap.transcript_ENST00000256585, Hsap.transcript_ENST00000259053, Hsap.transcript_ENST00000259633, Hsap.transcript_ENST00000261340, Hsap.transcript_ENST00000263636, Hsap.transcript_ENST00000265077, Hsa…	Isca.ISCW010467-RA	Lpol.rna10540, Lpol.rna13975, Lpol.rna14557, Lpol.rna14705, Lpol.rna15034, Lpol.rna15825, Lpol.rna2008, Lpol.rna2188, Lpol.rna22114, Lpol.rna22848, Lpol.rna24350, Lpol.rna24652, Lpol.rna3187, Lpol.rna5592, Lpol.rna9144	Mocc.rna10647, Mocc.rna13653, Mocc.rna16046	Ptep.aug3.g10372.t2, Ptep.aug3.g10373.t2, Ptep.aug3.g11178.t1, Ptep.aug3.g11179.t1, Ptep.aug3.g1424.t3, Ptep.aug3.g1631.t1, Ptep.aug3.g16443.t1, Ptep.aug3.g22602.t1, Ptep.aug3.g23601.t2, Ptep.aug3.g26900.t1, Ptep.aug3.g8440.t1		Phum.transcript_PHUM280850-RA, Phum.transcript_PHUM280960-RA, Phum.transcript_PHUM458550-RA	Smar.transcript_SMAR002287-RA, Smar.transcript_SMAR002310-RA, Smar.transcript_SMAR002311-RA, Smar.transcript_SMAR004728-RA, Smar.transcript_SMAR004729-RA, Smar.transcript_SMAR005267-RA, Smar.transcript_SMAR005913-RA, Smar.transcript_SMAR005914-RA, Smar.transcript_SMAR005915-RA, Smar.transcript_SMAR006202-RA, Smar.transcript_SMAR006204-RA, Smar.transcript_SMAR007751-RA, Smar.transcript_SMAR007754-…		Tcas.transcript_TC006978_003, Tcas.transcript_TC010898_001, Tcas.transcript_TC010947_001
OG0000029	IPR005828	Family Major facilitator, sugar transporter-like	GO:0055085 ( transmembrane transport ), GO:0008514 ( organic anion transmembrane transporter activity ), GO:0005887 ( integral component of plasma membrane ), GO:0055085 ( transmembrane transport ), GO:0005887 ( integral component of plasma membrane ), GO:0008514 ( organic anion transmembrane transporter activity ), GO:0015870 ( acetylcholine transport ), GO:0032223 ( negative regulation of synap…	contraction	contraction		5	11	38	19	43	19	20	6	24	18	27	33	32	29	10	17	12	14	377	18	NO	Alyc.aculy01g07890.1, Alyc.aculy01g13690.1, Alyc.aculy01g35440.1, Alyc.aculy02g18390.1, Alyc.aculy04g10410.1	Agam.AGAP001202-RA, Agam.AGAP003038-RA, Agam.AGAP003039-RA, Agam.AGAP003303-RA, Agam.AGAP004309-RA, Agam.AGAP005530-RA, Agam.AGAP006609-RA, Agam.AGAP008335-RA, Agam.AGAP010509-RA, Agam.AGAP012383-RA, Agam.AGAP013029-RA	Bmor.transcript_BGIBMGA000182-RA, Bmor.transcript_BGIBMGA001226-RA, Bmor.transcript_BGIBMGA001306-RA, Bmor.transcript_BGIBMGA001313-RA, Bmor.transcript_BGIBMGA001599-RA, Bmor.transcript_BGIBMGA001600-RA, Bmor.transcript_BGIBMGA001601-RA, Bmor.transcript_BGIBMGA002525-RA, Bmor.transcript_BGIBMGA002970-RA, Bmor.transcript_BGIBMGA003437-RA, Bmor.transcript_BGIBMGA008079-RA, Bmor.transcript_BGIBMGA00…	Cele.Transcript_B0252.3b, Cele.Transcript_B0361.11, Cele.Transcript_C06H5.6a.1, Cele.Transcript_C44C10.3, Cele.Transcript_C46C2.2.1, Cele.Transcript_F17C11.12a, Cele.Transcript_F23F12.13, Cele.Transcript_F23F12.3, Cele.Transcript_F45E10.2b, Cele.Transcript_F52F12.1a, Cele.Transcript_K05F1.6c.1, Cele.Transcript_K11D9.3.1, Cele.Transcript_T01B11.5a, Cele.Transcript_T01B11.7.1, Cele.Transcript_T12B3…	Cscu.CSCU001593-RA, Cscu.CSCU005520-RA, Cscu.CSCU006216-RA, Cscu.CSCU006338-RA, Cscu.CSCU006945-RA, Cscu.CSCU007981-RA, Cscu.CSCU010254-RA, Cscu.CSCU010811-RA, Cscu.CSCU012949-RA, Cscu.CSCU013748-RA, Cscu.CSCU013749-RA, Cscu.CSCU013751-RA, Cscu.CSCU014057-RA, Cscu.CSCU017140-RA, Cscu.CSCU017141-RA, Cscu.CSCU017235-RA, Cscu.CSCU017236-RA, Cscu.CSCU017238-RA, Cscu.CSCU017926-RA, Cscu.CSCU018470-RA,…	Drer.transcript_ENSDART00000007688, Drer.transcript_ENSDART00000024342, Drer.transcript_ENSDART00000031998, Drer.transcript_ENSDART00000044599, Drer.transcript_ENSDART00000048890, Drer.transcript_ENSDART00000076915, Drer.transcript_ENSDART00000077804, Drer.transcript_ENSDART00000078843, Drer.transcript_ENSDART00000078873, Drer.transcript_ENSDART00000081707, Drer.transcript_ENSDART00000082201, Dre…		Dpul.mRNA11799, Dpul.mRNA11803, Dpul.mRNA12753, Dpul.mRNA14492, Dpul.mRNA15246, Dpul.mRNA16102, Dpul.mRNA16648, Dpul.mRNA16650, Dpul.mRNA16815, Dpul.mRNA17846, Dpul.mRNA17848, Dpul.mRNA2388, Dpul.mRNA258, Dpul.mRNA259, Dpul.mRNA319, Dpul.mRNA6186, Dpul.mRNA6188, Dpul.mRNA6189, Dpul.mRNA6190, Dpul.mRNA6297	Dpte.g10547.t1, Dpte.g1474.t1, Dpte.g4168.t1, Dpte.g8711.t1, Dpte.g8712.t1, Dpte.g9616.t1	Dmel.FBtr0077029, Dmel.FBtr0078471, Dmel.FBtr0078475, Dmel.FBtr0081395, Dmel.FBtr0082991, Dmel.FBtr0082992, Dmel.FBtr0082993, Dmel.FBtr0083253, Dmel.FBtr0083278, Dmel.FBtr0083779, Dmel.FBtr0083780, Dmel.FBtr0083809, Dmel.FBtr0084598, Dmel.FBtr0084601, Dmel.FBtr0087815, Dmel.FBtr0113477, Dmel.FBtr0114553, Dmel.FBtr0114644, Dmel.FBtr0273217, Dmel.FBtr0299610, Dmel.FBtr0304745, Dmel.FBtr0333151, Dme…	Hsap.transcript_ENST00000200652, Hsap.transcript_ENST00000275300, Hsap.transcript_ENST00000279178, Hsap.transcript_ENST00000301891, Hsap.transcript_ENST00000306494, Hsap.transcript_ENST00000311856, Hsap.transcript_ENST00000332793, Hsap.transcript_ENST00000366953, Hsap.transcript_ENST00000366963, Hsap.transcript_ENST00000368919, Hsap.transcript_ENST00000369503, Hsap.transcript_ENST00000372585, Hsa…	Isca.ISCW001707-RA, Isca.ISCW002228-RA, Isca.ISCW004089-RA, Isca.ISCW005068-RA, Isca.ISCW006472-RA, Isca.ISCW006530-RA, Isca.ISCW007789-RA, Isca.ISCW008146-RA, Isca.ISCW008897-RA, Isca.ISCW010476-RA, Isca.ISCW010565-RA, Isca.ISCW013978-RA, Isca.ISCW014297-RA, Isca.ISCW016797-RA, Isca.ISCW018250-RA, Isca.ISCW018253-RA, Isca.ISCW018657-RA, Isca.ISCW018658-RA, Isca.ISCW018768-RA, Isca.ISCW020957-RA,…	Lpol.rna10234, Lpol.rna10390, Lpol.rna11135, Lpol.rna11342, Lpol.rna14171, Lpol.rna14211, Lpol.rna1554, Lpol.rna16117, Lpol.rna17592, Lpol.rna18445, Lpol.rna18717, Lpol.rna18936, Lpol.rna19168, Lpol.rna19530, Lpol.rna19534, Lpol.rna19950, Lpol.rna21351, Lpol.rna22158, Lpol.rna22294, Lpol.rna23392, Lpol.rna23733, Lpol.rna23830, Lpol.rna2387, Lpol.rna2388, Lpol.rna2389, Lpol.rna2390, Lpol.rna2391, …	Mocc.rna10953, Mocc.rna10955, Mocc.rna1099, Mocc.rna11966, Mocc.rna11972, Mocc.rna11973, Mocc.rna11977, Mocc.rna12053, Mocc.rna12671, Mocc.rna13143, Mocc.rna13351, Mocc.rna13615, Mocc.rna13683, Mocc.rna13868, Mocc.rna14209, Mocc.rna14211, Mocc.rna14212, Mocc.rna14214, Mocc.rna14216, Mocc.rna14217, Mocc.rna15736, Mocc.rna16036, Mocc.rna16347, Mocc.rna17212, Mocc.rna17446, Mocc.rna18276, Mocc.rna33…	Ptep.aug3.g10377.t1, Ptep.aug3.g10378.t1, Ptep.aug3.g1046.t1, Ptep.aug3.g11693.t1, Ptep.aug3.g1297.t1, Ptep.aug3.g13750.t1, Ptep.aug3.g1591.t2, Ptep.aug3.g17899.t2, Ptep.aug3.g1922.t1, Ptep.aug3.g22690.t1, Ptep.aug3.g23615.t1, Ptep.aug3.g23617.t2, Ptep.aug3.g23620.t2, Ptep.aug3.g24344.t1, Ptep.aug3.g24601.t1, Ptep.aug3.g26542.t2, Ptep.aug3.g27641.t1, Ptep.aug3.g27644.t1, Ptep.aug3.g2954.t1, Ptep.…		Phum.transcript_PHUM106080-RA, Phum.transcript_PHUM106290-RA, Phum.transcript_PHUM106930-RA, Phum.transcript_PHUM221140-RA, Phum.transcript_PHUM284880-RA, Phum.transcript_PHUM298040-RA, Phum.transcript_PHUM311480-RA, Phum.transcript_PHUM411110-RA, Phum.transcript_PHUM600220-RA, Phum.transcript_PHUM605140-RA	Smar.transcript_SMAR001512-RA, Smar.transcript_SMAR001513-RA, Smar.transcript_SMAR003396-RA, Smar.transcript_SMAR003760-RA, Smar.transcript_SMAR005892-RA, Smar.transcript_SMAR005894-RA, Smar.transcript_SMAR005895-RA, Smar.transcript_SMAR005896-RA, Smar.transcript_SMAR006972-RA, Smar.transcript_SMAR007650-RA, Smar.transcript_SMAR008573-RA, Smar.transcript_SMAR009678-RA, Smar.transcript_SMAR010845-…	Turt.mRNA_tetur02g02460, Turt.mRNA_tetur05g06990, Turt.mRNA_tetur10g05771, Turt.mRNA_tetur16g01720, Turt.mRNA_tetur184g00020, Turt.mRNA_tetur18g03687, Turt.mRNA_tetur24g01510, Turt.mRNA_tetur24g01970, Turt.mRNA_tetur24g02160, Turt.mRNA_tetur27g01690, Turt.mRNA_tetur29g00920, Turt.mRNA_tetur97g00070	Tcas.transcript_TC000561_001, Tcas.transcript_TC000585_001, Tcas.transcript_TC001230_001, Tcas.transcript_TC002947_001, Tcas.transcript_TC003564_001, Tcas.transcript_TC010506_001, Tcas.transcript_TC010761_001, Tcas.transcript_TC010997_001, Tcas.transcript_TC011448_001, Tcas.transcript_TC012933_001, Tcas.transcript_TC014155_001, Tcas.transcript_TC014156_001, Tcas.transcript_TC014673_001, Tcas.tran…
OG0000030	IPR001128	Family Cytochrome P450	GO:0048477 ( oogenesis ), GO:0001700 ( embryonic development via the syncytial blastoderm ), GO:0055114 ( oxidation-reduction process ), GO:0016705 ( oxidoreductase activity, acting on paired donors, with incorporation or reduction of molecular oxygen ), GO:0020037 ( heme binding ), GO:0005506 ( iron ion binding ), GO:0005783 ( endoplasmic reticulum ), GO:0035302 ( ecdysteroid 25-hydroxylase acti…	contraction	contraction		1	11	6	45	13	51	16	2	5	22	45	11	5	50	6	12	57	7	365	18	NO	Alyc.aculy01g01800.1	Agam.AGAP003065-RA, Agam.AGAP003066-RA, Agam.AGAP003067-RA, Agam.AGAP004665-RA, Agam.AGAP005656-RA, Agam.AGAP005657-RA, Agam.AGAP005658-RA, Agam.AGAP005660-RA, Agam.AGAP010077-RA, Agam.AGAP012667-RA, Agam.AGAP012937-RA	Bmor.transcript_BGIBMGA000640-RA, Bmor.transcript_BGIBMGA002085-RA, Bmor.transcript_BGIBMGA006915-RA, Bmor.transcript_BGIBMGA006916-RA, Bmor.transcript_BGIBMGA006936-RA, Bmor.transcript_BGIBMGA011708-RA	Cele.Transcript_B0213.10, Cele.Transcript_B0213.11a, Cele.Transcript_B0213.12, Cele.Transcript_B0213.14.1, Cele.Transcript_B0213.15b, Cele.Transcript_B0213.16, Cele.Transcript_B0304.3, Cele.Transcript_C03G6.14, Cele.Transcript_C03G6.15, Cele.Transcript_C06B3.3, Cele.Transcript_C12D5.7, Cele.Transcript_C25E10.2, Cele.Transcript_C34B7.3, Cele.Transcript_C45H4.17a, Cele.Transcript_C45H4.2, Cele.Tran…	Cscu.CSCU001134-RA, Cscu.CSCU003401-RA, Cscu.CSCU006340-RA, Cscu.CSCU011540-RA, Cscu.CSCU014818-RA, Cscu.CSCU014820-RA, Cscu.CSCU015457-RA, Cscu.CSCU017148-RA, Cscu.CSCU017149-RA, Cscu.CSCU020928-RA, Cscu.CSCU020929-RA, Cscu.CSCU022840-RA, Cscu.CSCU028147-RA	Drer.transcript_ENSDART00000003666, Drer.transcript_ENSDART00000015232, Drer.transcript_ENSDART00000016501, Drer.transcript_ENSDART00000024350, Drer.transcript_ENSDART00000043156, Drer.transcript_ENSDART00000048281, Drer.transcript_ENSDART00000051565, Drer.transcript_ENSDART00000052054, Drer.transcript_ENSDART00000063058, Drer.transcript_ENSDART00000063064, Drer.transcript_ENSDART00000063100, Dre…		Dpul.mRNA10017, Dpul.mRNA10035, Dpul.mRNA13496, Dpul.mRNA13519, Dpul.mRNA16233, Dpul.mRNA2233, Dpul.mRNA2301, Dpul.mRNA471, Dpul.mRNA6756, Dpul.mRNA6774, Dpul.mRNA7300, Dpul.mRNA9580, Dpul.mRNA9581, Dpul.mRNA9582, Dpul.mRNA9610, Dpul.mRNA9618	Dpte.g6170.t1, Dpte.g7629.t1	Dmel.FBtr0074603, Dmel.FBtr0074610, Dmel.FBtr0074925, Dmel.FBtr0080828, Dmel.FBtr0082691	Hsap.transcript_ENST00000252945, Hsap.transcript_ENST00000260682, Hsap.transcript_ENST00000285979, Hsap.transcript_ENST00000301141, Hsap.transcript_ENST00000301146, Hsap.transcript_ENST00000308919, Hsap.transcript_ENST00000310054, Hsap.transcript_ENST00000324071, Hsap.transcript_ENST00000330436, Hsap.transcript_ENST00000331105, Hsap.transcript_ENST00000332884, Hsap.transcript_ENST00000334636, Hsa…	Isca.ISCW002062-RA, Isca.ISCW002182-RA, Isca.ISCW002226-RA, Isca.ISCW002317-RA, Isca.ISCW003266-RA, Isca.ISCW003457-RA, Isca.ISCW004521-RA, Isca.ISCW004522-RA, Isca.ISCW005196-RA, Isca.ISCW005226-RA, Isca.ISCW005591-RA, Isca.ISCW006203-RA, Isca.ISCW006204-RA, Isca.ISCW006219-RA, Isca.ISCW006380-RA, Isca.ISCW006806-RA, Isca.ISCW006867-RA, Isca.ISCW006936-RA, Isca.ISCW007349-RA, Isca.ISCW008112-RA,…	Lpol.rna10191, Lpol.rna10192, Lpol.rna15309, Lpol.rna20070, Lpol.rna21800, Lpol.rna22774, Lpol.rna22936, Lpol.rna5937, Lpol.rna5938, Lpol.rna8055, Lpol.rna8442	Mocc.rna10115, Mocc.rna11932, Mocc.rna16446, Mocc.rna16449, Mocc.rna17118	Ptep.aug3.g10414.t1, Ptep.aug3.g10415.t1, Ptep.aug3.g10417.t1, Ptep.aug3.g10419.t1, Ptep.aug3.g10421.t1, Ptep.aug3.g10422.t1, Ptep.aug3.g10495.t1, Ptep.aug3.g12529.t1, Ptep.aug3.g12530.t1, Ptep.aug3.g12531.t1, Ptep.aug3.g13010.t1, Ptep.aug3.g13314.t1, Ptep.aug3.g13316.t1, Ptep.aug3.g13317.t1, Ptep.aug3.g1366.t1, Ptep.aug3.g1528.t3, Ptep.aug3.g1529.t1, Ptep.aug3.g166.t1, Ptep.aug3.g17439.t2, Ptep.…		Phum.transcript_PHUM035220-RA, Phum.transcript_PHUM084900-RA, Phum.transcript_PHUM130920-RA, Phum.transcript_PHUM319530-RA, Phum.transcript_PHUM319540-RA, Phum.transcript_PHUM539320-RA	Smar.transcript_SMAR001250-RA, Smar.transcript_SMAR003120-RA, Smar.transcript_SMAR004341-RA, Smar.transcript_SMAR006520-RA, Smar.transcript_SMAR009496-RA, Smar.transcript_SMAR011026-RA, Smar.transcript_SMAR011198-RA, Smar.transcript_SMAR011199-RA, Smar.transcript_SMAR011491-RA, Smar.transcript_SMAR014368-RA, Smar.transcript_SMAR015220-RA, Smar.transcript_SMAR015775-RA	Turt.mRNA_tetur02g06640, Turt.mRNA_tetur02g06650, Turt.mRNA_tetur02g14020, Turt.mRNA_tetur02g14330, Turt.mRNA_tetur02g14400, Turt.mRNA_tetur02g14510, Turt.mRNA_tetur03g00010, Turt.mRNA_tetur03g00020, Turt.mRNA_tetur03g00800, Turt.mRNA_tetur03g00830, Turt.mRNA_tetur03g00970, Turt.mRNA_tetur03g03950, Turt.mRNA_tetur03g04990, Turt.mRNA_tetur03g05000, Turt.mRNA_tetur03g05010, Turt.mRNA_tetur03g05020,…	Tcas.transcript_TC000411_001, Tcas.transcript_TC001916_001, Tcas.transcript_TC002551_001, Tcas.transcript_TC002552_001, Tcas.transcript_TC032581_001, Tcas.transcript_TC033306_001, Tcas.transcript_TC034858_001
OG0000031	IPR023796	Domain Serpin domain	GO:0005615 ( extracellular space ), GO:0035009 ( negative regulation of melanization defense response ), GO:0045861 ( negative regulation of proteolysis ), GO:0004867 ( serine-type endopeptidase inhibitor activity ), GO:0005615 ( extracellular space ), GO:0032504 ( multicellular organism reproduction ), GO:0004867 ( serine-type endopeptidase inhibitor activity ), GO:0005615 ( extracellular space …	contraction	contraction		4	19	17	6	28	28	9	12	29	34	37	22	12	28	13	10	21	23	352	18	NO	Alyc.aculy01g12970.1, Alyc.aculy01g13300.1, Alyc.aculy02g14660.1, Alyc.aculy02g20330.1	Agam.AGAP001375-RA, Agam.AGAP001376-RA, Agam.AGAP001377-RA, Agam.AGAP003139-RA, Agam.AGAP003194-RB, Agam.AGAP004198-RA, Agam.AGAP005246-RA, Agam.AGAP006909-RA, Agam.AGAP006910-RA, Agam.AGAP006911-RA, Agam.AGAP007691-RC, Agam.AGAP007692-RA, Agam.AGAP007693-RA, Agam.AGAP009212-RA, Agam.AGAP009213-RA, Agam.AGAP009221-RA, Agam.AGAP009670-RA, Agam.AGAP012938-RA, Agam.AGAP028210-RA	Bmor.transcript_BGIBMGA001983-RA, Bmor.transcript_BGIBMGA003349-RA, Bmor.transcript_BGIBMGA007720-RA, Bmor.transcript_BGIBMGA007729-RA, Bmor.transcript_BGIBMGA009953-RA, Bmor.transcript_BGIBMGA010212-RA, Bmor.transcript_BGIBMGA010213-RA, Bmor.transcript_BGIBMGA010214-RA, Bmor.transcript_BGIBMGA010216-RA, Bmor.transcript_BGIBMGA010900-RA, Bmor.transcript_BGIBMGA011587-RA, Bmor.transcript_BGIBMGA01…	Cele.Transcript_C03G6.19, Cele.Transcript_C05E4.1.1, Cele.Transcript_C05E4.3, Cele.Transcript_F20D6.3, Cele.Transcript_F20D6.4d, Cele.Transcript_Y32G9A.4	Cscu.CSCU001448-RA, Cscu.CSCU011530-RA, Cscu.CSCU011531-RA, Cscu.CSCU011532-RA, Cscu.CSCU011533-RA, Cscu.CSCU013081-RA, Cscu.CSCU013083-RA, Cscu.CSCU013085-RA, Cscu.CSCU013086-RA, Cscu.CSCU013087-RA, Cscu.CSCU013180-RA, Cscu.CSCU014260-RA, Cscu.CSCU014262-RA, Cscu.CSCU015201-RA, Cscu.CSCU015210-RA, Cscu.CSCU015211-RA, Cscu.CSCU015212-RA, Cscu.CSCU015213-RA, Cscu.CSCU015214-RA, Cscu.CSCU015215-RA,…	Drer.transcript_ENSDART00000010293, Drer.transcript_ENSDART00000010658, Drer.transcript_ENSDART00000021820, Drer.transcript_ENSDART00000041677, Drer.transcript_ENSDART00000050644, Drer.transcript_ENSDART00000062618, Drer.transcript_ENSDART00000077769, Drer.transcript_ENSDART00000077787, Drer.transcript_ENSDART00000079347, Drer.transcript_ENSDART00000079864, Drer.transcript_ENSDART00000100166, Dre…		Dpul.mRNA11210, Dpul.mRNA11214, Dpul.mRNA14079, Dpul.mRNA15589, Dpul.mRNA5952, Dpul.mRNA6218, Dpul.mRNA6224, Dpul.mRNA6859, Dpul.mRNA7914	Dpte.g1015.t1, Dpte.g108.t1, Dpte.g12526.t1, Dpte.g6876.t1, Dpte.g7780.t1, Dpte.g8124.t1, Dpte.g8125.t1, Dpte.g8126.t1, Dpte.g8127.t1, Dpte.g8128.t1, Dpte.g8533.t1, Dpte.g9826.t1	Dmel.FBtr0074841, Dmel.FBtr0074843, Dmel.FBtr0079470, Dmel.FBtr0079549, Dmel.FBtr0079557, Dmel.FBtr0079624, Dmel.FBtr0079938, Dmel.FBtr0081450, Dmel.FBtr0082171, Dmel.FBtr0083140, Dmel.FBtr0083142, Dmel.FBtr0085698, Dmel.FBtr0086162, Dmel.FBtr0086164, Dmel.FBtr0086196, Dmel.FBtr0086733, Dmel.FBtr0089041, Dmel.FBtr0089052, Dmel.FBtr0089053, Dmel.FBtr0100356, Dmel.FBtr0110771, Dmel.FBtr0110777, Dme…	Hsap.transcript_ENST00000215727, Hsap.transcript_ENST00000223095, Hsap.transcript_ENST00000238508, Hsap.transcript_ENST00000254722, Hsap.transcript_ENST00000269489, Hsap.transcript_ENST00000283752, Hsap.transcript_ENST00000295777, Hsap.transcript_ENST00000299502, Hsap.transcript_ENST00000334708, Hsap.transcript_ENST00000336429, Hsap.transcript_ENST00000337425, Hsap.transcript_ENST00000341074, Hsa…	Isca.ISCW000427-RA, Isca.ISCW004156-RA, Isca.ISCW005088-RA, Isca.ISCW006061-RA, Isca.ISCW009616-RA, Isca.ISCW010066-RA, Isca.ISCW010422-RA, Isca.ISCW011013-RA, Isca.ISCW011016-RA, Isca.ISCW011017-RA, Isca.ISCW014100-RA, Isca.ISCW014652-RA, Isca.ISCW014779-RA, Isca.ISCW015198-RA, Isca.ISCW015204-RA, Isca.ISCW015349-RA, Isca.ISCW016489-RA, Isca.ISCW018607-RA, Isca.ISCW020581-RA, Isca.ISCW021415-RA,…	Lpol.rna10767, Lpol.rna1127, Lpol.rna12654, Lpol.rna15934, Lpol.rna15935, Lpol.rna15936, Lpol.rna17763, Lpol.rna18114, Lpol.rna18115, Lpol.rna18259, Lpol.rna1928, Lpol.rna21397, Lpol.rna21818, Lpol.rna21819, Lpol.rna22137, Lpol.rna2281, Lpol.rna25187, Lpol.rna5035, Lpol.rna6033, Lpol.rna7528, Lpol.rna8314, Lpol.rna9122	Mocc.rna1101, Mocc.rna1102, Mocc.rna11643, Mocc.rna12645, Mocc.rna13292, Mocc.rna13524, Mocc.rna14222, Mocc.rna14223, Mocc.rna17803, Mocc.rna467, Mocc.rna5780, Mocc.rna6188	Ptep.aug3.g1060.t1, Ptep.aug3.g11037.t1, Ptep.aug3.g13559.t1, Ptep.aug3.g18534.t1, Ptep.aug3.g18605.t1, Ptep.aug3.g18606.t1, Ptep.aug3.g18607.t1, Ptep.aug3.g18608.t1, Ptep.aug3.g20374.t1, Ptep.aug3.g20412.t1, Ptep.aug3.g20413.t1, Ptep.aug3.g20414.t1, Ptep.aug3.g20807.t1, Ptep.aug3.g20808.t1, Ptep.aug3.g24368.t1, Ptep.aug3.g24654.t1, Ptep.aug3.g26180.t1, Ptep.aug3.g26893.t1, Ptep.aug3.g26894.t2, P…		Phum.transcript_PHUM075870-RA, Phum.transcript_PHUM106570-RA, Phum.transcript_PHUM106690-RA, Phum.transcript_PHUM108970-RA, Phum.transcript_PHUM220550-RA, Phum.transcript_PHUM221060-RA, Phum.transcript_PHUM291170-RA, Phum.transcript_PHUM291180-RA, Phum.transcript_PHUM291190-RA, Phum.transcript_PHUM291200-RA, Phum.transcript_PHUM311330-RA, Phum.transcript_PHUM432060-RA, Phum.transcript_PHUM492620-…	Smar.transcript_SMAR000663-RA, Smar.transcript_SMAR001099-RA, Smar.transcript_SMAR003045-RA, Smar.transcript_SMAR003048-RA, Smar.transcript_SMAR003087-RA, Smar.transcript_SMAR004057-RA, Smar.transcript_SMAR004060-RA, Smar.transcript_SMAR005784-RA, Smar.transcript_SMAR013388-RA, Smar.transcript_SMAR015154-RA	Turt.mRNA_tetur01g02240, Turt.mRNA_tetur02g03240, Turt.mRNA_tetur05g01350, Turt.mRNA_tetur08g03770, Turt.mRNA_tetur08g04280, Turt.mRNA_tetur08g04290, Turt.mRNA_tetur10g04760, Turt.mRNA_tetur10g04770, Turt.mRNA_tetur10g04780, Turt.mRNA_tetur10g04790, Turt.mRNA_tetur10g04810, Turt.mRNA_tetur10g04820, Turt.mRNA_tetur10g92745, Turt.mRNA_tetur128g00010, Turt.mRNA_tetur128g00020, Turt.mRNA_tetur128g000…	Tcas.transcript_TC000760_002, Tcas.transcript_TC002085_001, Tcas.transcript_TC005065_001, Tcas.transcript_TC005740_001, Tcas.transcript_TC005750_001, Tcas.transcript_TC005751_001, Tcas.transcript_TC005754_001, Tcas.transcript_TC005771_001, Tcas.transcript_TC006255_001, Tcas.transcript_TC007869_001, Tcas.transcript_TC011718_001, Tcas.transcript_TC013310_001, Tcas.transcript_TC013389_001, Tcas.tran…
OG0000032	IPR027806	Domain Harbinger transposase-derived nuclease domain	GO:0005575 ( cellular_component ), GO:0003674 ( molecular_function ), GO:0008150 ( biological_process ), GO:0003674 ( molecular_function ), GO:0005575 ( cellular_component ), GO:0008150 ( biological_process )	contraction	contraction		0	6	15	0	178	21	4	4	5	1	40	4	6	36	0	14	0	14	348	14	NO		Agam.AGAP003812-RA, Agam.AGAP012484-RA, Agam.AGAP012888-RA, Agam.AGAP013250-RB, Agam.AGAP013326-RA, Agam.AGAP028579-RA	Bmor.transcript_BGIBMGA001263-RA, Bmor.transcript_BGIBMGA002359-RA, Bmor.transcript_BGIBMGA004234-RA, Bmor.transcript_BGIBMGA004771-RA, Bmor.transcript_BGIBMGA005228-RA, Bmor.transcript_BGIBMGA006963-RA, Bmor.transcript_BGIBMGA007164-RA, Bmor.transcript_BGIBMGA008197-RA, Bmor.transcript_BGIBMGA008388-RA, Bmor.transcript_BGIBMGA008697-RA, Bmor.transcript_BGIBMGA009350-RA, Bmor.transcript_BGIBMGA00…		Cscu.CSCU000640-RA, Cscu.CSCU001925-RA, Cscu.CSCU002390-RA, Cscu.CSCU002453-RA, Cscu.CSCU002463-RA, Cscu.CSCU002465-RA, Cscu.CSCU002472-RA, Cscu.CSCU002690-RA, Cscu.CSCU002737-RA, Cscu.CSCU002738-RA, Cscu.CSCU003137-RA, Cscu.CSCU003399-RA, Cscu.CSCU003522-RA, Cscu.CSCU003606-RA, Cscu.CSCU003668-RA, Cscu.CSCU005134-RA, Cscu.CSCU005167-RA, Cscu.CSCU005278-RA, Cscu.CSCU005953-RA, Cscu.CSCU006204-RA,…	Drer.transcript_ENSDART00000052323, Drer.transcript_ENSDART00000065568, Drer.transcript_ENSDART00000074109, Drer.transcript_ENSDART00000078640, Drer.transcript_ENSDART00000082245, Drer.transcript_ENSDART00000097308, Drer.transcript_ENSDART00000099586, Drer.transcript_ENSDART00000102701, Drer.transcript_ENSDART00000110468, Drer.transcript_ENSDART00000111467, Drer.transcript_ENSDART00000112777, Dre…		Dpul.mRNA10825, Dpul.mRNA4620, Dpul.mRNA5999, Dpul.mRNA8276	Dpte.g12399.t1, Dpte.g12530.t1, Dpte.g172.t1, Dpte.g7599.t1	Dmel.FBtr0075169, Dmel.FBtr0076077, Dmel.FBtr0076821, Dmel.FBtr0080149, Dmel.FBtr0304873	Hsap.transcript_ENST00000326737	Isca.ISCW000038-RA, Isca.ISCW000460-RA, Isca.ISCW001017-RA, Isca.ISCW002843-RA, Isca.ISCW003660-RA, Isca.ISCW003820-RA, Isca.ISCW004686-RA, Isca.ISCW006552-RA, Isca.ISCW006868-RA, Isca.ISCW006870-RA, Isca.ISCW007041-RA, Isca.ISCW009485-RA, Isca.ISCW009502-RA, Isca.ISCW009521-RA, Isca.ISCW010095-RA, Isca.ISCW011660-RA, Isca.ISCW011723-RA, Isca.ISCW012275-RA, Isca.ISCW012658-RA, Isca.ISCW013223-RA,…	Lpol.rna17904, Lpol.rna7085, Lpol.rna8634, Lpol.rna9282	Mocc.rna10786, Mocc.rna1678, Mocc.rna2055, Mocc.rna2765, Mocc.rna4820, Mocc.rna9684	Ptep.aug3.g12254.t1, Ptep.aug3.g12491.t1, Ptep.aug3.g12495.t1, Ptep.aug3.g12928.t1, Ptep.aug3.g12939.t1, Ptep.aug3.g14141.t1, Ptep.aug3.g15955.t1, Ptep.aug3.g16278.t1, Ptep.aug3.g16955.t1, Ptep.aug3.g17306.t1, Ptep.aug3.g17829.t1, Ptep.aug3.g18538.t1, Ptep.aug3.g18864.t1, Ptep.aug3.g19180.t1, Ptep.aug3.g19528.t1, Ptep.aug3.g19530.t1, Ptep.aug3.g19534.t1, Ptep.aug3.g20537.t1, Ptep.aug3.g2058.t1, P…			Smar.transcript_SMAR000409-RA, Smar.transcript_SMAR001273-RA, Smar.transcript_SMAR001275-RA, Smar.transcript_SMAR001381-RA, Smar.transcript_SMAR003647-RA, Smar.transcript_SMAR004644-RA, Smar.transcript_SMAR004669-RA, Smar.transcript_SMAR004760-RA, Smar.transcript_SMAR006423-RA, Smar.transcript_SMAR009164-RA, Smar.transcript_SMAR009598-RA, Smar.transcript_SMAR009878-RA, Smar.transcript_SMAR010017-…		Tcas.transcript_TC000011_001, Tcas.transcript_TC002181_001, Tcas.transcript_TC002318_001, Tcas.transcript_TC004575_001, Tcas.transcript_TC004986_001, Tcas.transcript_TC006950_001, Tcas.transcript_TC007020_001, Tcas.transcript_TC010492_001, Tcas.transcript_TC010570_001, Tcas.transcript_TC015989_001, Tcas.transcript_TC016403_001, Tcas.transcript_TC033510_001, Tcas.transcript_TC033941_001, Tcas.tran…
OG0000033	IPR006600;IPR004875	Domain HTH CenpB-type DNA-binding domain;Domain DDE superfamily endonuclease domain	GO:0003677 ( DNA binding ), GO:0007527 ( adult somatic muscle development ), GO:0003677 ( DNA binding )	NA	NA		2	1	7	2	115	1	4	2	2	10	21	18	67	72	2	4	0	3	333	17	NO	Alyc.aculy01g11670.1, Alyc.aculy01g31430.1	Agam.AGAP003894-RA	Bmor.transcript_BGIBMGA007549-RA, Bmor.transcript_BGIBMGA007903-RA, Bmor.transcript_BGIBMGA008012-RA, Bmor.transcript_BGIBMGA011195-RA, Bmor.transcript_BGIBMGA012158-RA, Bmor.transcript_BGIBMGA012233-RA, Bmor.transcript_BGIBMGA013031-RA	Cele.Transcript_K04G11.2, Cele.Transcript_Y53G8AM.8.1	Cscu.CSCU000272-RA, Cscu.CSCU000567-RA, Cscu.CSCU000893-RA, Cscu.CSCU000894-RA, Cscu.CSCU001200-RA, Cscu.CSCU001210-RA, Cscu.CSCU001898-RA, Cscu.CSCU002117-RA, Cscu.CSCU002226-RA, Cscu.CSCU002578-RA, Cscu.CSCU002627-RA, Cscu.CSCU002969-RA, Cscu.CSCU002977-RA, Cscu.CSCU003181-RA, Cscu.CSCU003662-RA, Cscu.CSCU004029-RA, Cscu.CSCU004053-RA, Cscu.CSCU004427-RA, Cscu.CSCU004494-RA, Cscu.CSCU004525-RA,…	Drer.transcript_ENSDART00000097429		Dpul.mRNA13423, Dpul.mRNA15943, Dpul.mRNA9181, Dpul.mRNA9182	Dpte.g12271.t1, Dpte.g5212.t1	Dmel.FBtr0305306, Dmel.FBtr0331937	Hsap.transcript_ENST00000296736, Hsap.transcript_ENST00000304337, Hsap.transcript_ENST00000309880, Hsap.transcript_ENST00000317005, Hsap.transcript_ENST00000332349, Hsap.transcript_ENST00000379751, Hsap.transcript_ENST00000396862, Hsap.transcript_ENST00000408957, Hsap.transcript_ENST00000504548, Hsap.transcript_ENST00000612905	Isca.ISCW000571-RA, Isca.ISCW003253-RA, Isca.ISCW003902-RA, Isca.ISCW004917-RA, Isca.ISCW005026-RA, Isca.ISCW005545-RA, Isca.ISCW006110-RA, Isca.ISCW007649-RA, Isca.ISCW008258-RA, Isca.ISCW008259-RA, Isca.ISCW008297-RA, Isca.ISCW009362-RA, Isca.ISCW009605-RA, Isca.ISCW011730-RA, Isca.ISCW017904-RA, Isca.ISCW017954-RA, Isca.ISCW019886-RA, Isca.ISCW020526-RA, Isca.ISCW021206-RA, Isca.ISCW023449-RA,…	Lpol.rna10428, Lpol.rna1599, Lpol.rna1766, Lpol.rna18349, Lpol.rna18350, Lpol.rna19149, Lpol.rna19771, Lpol.rna21703, Lpol.rna23743, Lpol.rna25161, Lpol.rna25229, Lpol.rna2832, Lpol.rna5291, Lpol.rna597, Lpol.rna7182, Lpol.rna7370, Lpol.rna8627, Lpol.rna9266	Mocc.rna10045, Mocc.rna10186, Mocc.rna1034, Mocc.rna10790, Mocc.rna11062, Mocc.rna11170, Mocc.rna11560, Mocc.rna11629, Mocc.rna11744, Mocc.rna1181, Mocc.rna12903, Mocc.rna13963, Mocc.rna13965, Mocc.rna15720, Mocc.rna16152, Mocc.rna16155, Mocc.rna16193, Mocc.rna16716, Mocc.rna17447, Mocc.rna17928, Mocc.rna18157, Mocc.rna18263, Mocc.rna18687, Mocc.rna18809, Mocc.rna18810, Mocc.rna2050, Mocc.rna2073…	Ptep.aug3.g1019.t1, Ptep.aug3.g10330.t1, Ptep.aug3.g10398.t1, Ptep.aug3.g10676.t1, Ptep.aug3.g10717.t1, Ptep.aug3.g10926.t1, Ptep.aug3.g11318.t1, Ptep.aug3.g11328.t1, Ptep.aug3.g11512.t2, Ptep.aug3.g11978.t1, Ptep.aug3.g12007.t1, Ptep.aug3.g12008.t1, Ptep.aug3.g12347.t1, Ptep.aug3.g12601.t1, Ptep.aug3.g13749.t1, Ptep.aug3.g1567.t1, Ptep.aug3.g15876.t1, Ptep.aug3.g16274.t1, Ptep.aug3.g16505.t2, Pt…		Phum.transcript_PHUM451900-RA, Phum.transcript_PHUM595770-RA	Smar.transcript_SMAR001076-RA, Smar.transcript_SMAR010934-RA, Smar.transcript_SMAR013632-RA, Smar.transcript_SMAR015179-RA		Tcas.transcript_TC003750_001, Tcas.transcript_TC005011_001, Tcas.transcript_TC016411_001
OG0000034	None	None	GO:0003674 ( molecular_function ), GO:0032504 ( multicellular organism reproduction ), GO:0005615 ( extracellular space )	NA	NA		0	0	0	0	0	0	299	0	1	5	1	3	1	2	0	1	0	1	314	9	NO								Dpul.mRNA10060, Dpul.mRNA10088, Dpul.mRNA10165, Dpul.mRNA10166, Dpul.mRNA10183, Dpul.mRNA10235, Dpul.mRNA10238, Dpul.mRNA10259, Dpul.mRNA10424, Dpul.mRNA1047, Dpul.mRNA1058, Dpul.mRNA1068, Dpul.mRNA10705, Dpul.mRNA10853, Dpul.mRNA10855, Dpul.mRNA10892, Dpul.mRNA10894, Dpul.mRNA11051, Dpul.mRNA11145, Dpul.mRNA11146, Dpul.mRNA11242, Dpul.mRNA1126, Dpul.mRNA11637, Dpul.mRNA11647, Dpul.mRNA11673, Dpu…		Dmel.FBtr0079829	Hsap.transcript_ENST00000307098, Hsap.transcript_ENST00000307522, Hsap.transcript_ENST00000331860, Hsap.transcript_ENST00000368762, Hsap.transcript_ENST00000617053	Isca.ISCW002403-RA	Lpol.rna18741, Lpol.rna22301, Lpol.rna24194	Mocc.rna14384	Ptep.aug3.g15191.t1, Ptep.aug3.g6661.t1			Smar.transcript_SMAR002797-RA		Tcas.transcript_TC031463_002
OG0000035	None	None	GO:0005575 ( cellular_component ), GO:0008150 ( biological_process ), GO:0008270 ( zinc ion binding ), GO:0005575 ( cellular_component ), GO:0008150 ( biological_process ), GO:0008270 ( zinc ion binding ), GO:0008270 ( zinc ion binding ), GO:0004842 ( ubiquitin-protein transferase activity ), GO:0051865 ( protein autoubiquitination ), GO:0035194 ( posttranscriptional gene silencing by RNA ), GO:0…	contraction	NA		1	3	2	4	9	170	7	1	4	82	3	4	1	4	1	5	3	3	307	18	NO	Alyc.aculy01g28560.1	Agam.AGAP001292-RA, Agam.AGAP009708-RA, Agam.AGAP013215-RA	Bmor.transcript_BGIBMGA007576-RA, Bmor.transcript_BGIBMGA010632-RA	Cele.Transcript_F08G12.5, Cele.Transcript_T02C1.1, Cele.Transcript_T02C1.2, Cele.Transcript_Y47G6A.14.1	Cscu.CSCU005508-RA, Cscu.CSCU006086-RA, Cscu.CSCU008323-RA, Cscu.CSCU010025-RA, Cscu.CSCU010733-RA, Cscu.CSCU017379-RA, Cscu.CSCU021266-RA, Cscu.CSCU027315-RA, Cscu.CSCU028355-RA	Drer.transcript_ENSDART00000005767, Drer.transcript_ENSDART00000016758, Drer.transcript_ENSDART00000019667, Drer.transcript_ENSDART00000022008, Drer.transcript_ENSDART00000031885, Drer.transcript_ENSDART00000036273, Drer.transcript_ENSDART00000036283, Drer.transcript_ENSDART00000037332, Drer.transcript_ENSDART00000041787, Drer.transcript_ENSDART00000044425, Drer.transcript_ENSDART00000056164, Dre…		Dpul.mRNA11587, Dpul.mRNA13951, Dpul.mRNA14437, Dpul.mRNA15694, Dpul.mRNA17430, Dpul.mRNA745, Dpul.mRNA7549	Dpte.g11191.t1	Dmel.FBtr0302450, Dmel.FBtr0307053, Dmel.FBtr0329922, Dmel.FBtr0339238	Hsap.transcript_ENST00000217740, Hsap.transcript_ENST00000219596, Hsap.transcript_ENST00000244061, Hsap.transcript_ENST00000244360, Hsap.transcript_ENST00000244513, Hsap.transcript_ENST00000244519, Hsap.transcript_ENST00000248983, Hsap.transcript_ENST00000249007, Hsap.transcript_ENST00000254436, Hsap.transcript_ENST00000254816, Hsap.transcript_ENST00000261593, Hsap.transcript_ENST00000261658, Hsa…	Isca.ISCW016152-RA, Isca.ISCW017833-RA, Isca.ISCW019978-RA	Lpol.rna12337, Lpol.rna16474, Lpol.rna16809, Lpol.rna17291	Mocc.rna10513	Ptep.aug3.g13838.t1, Ptep.aug3.g20621.t1, Ptep.aug3.g21198.t1, Ptep.aug3.g23025.t1		Phum.transcript_PHUM307800-RA	Smar.transcript_SMAR010198-RA, Smar.transcript_SMAR013027-RA, Smar.transcript_SMAR013029-RA, Smar.transcript_SMAR014314-RA, Smar.transcript_SMAR014796-RA	Turt.mRNA_tetur03g01380, Turt.mRNA_tetur14g00220, Turt.mRNA_tetur339g00030	Tcas.transcript_TC000080_001, Tcas.transcript_TC005071_001, Tcas.transcript_TC015080_001
OG0000036	IPR018289	Domain MULE transposase domain	NA	contraction	NA		0	0	0	6	9	0	4	1	0	0	11	3	222	19	1	25	0	6	307	11	NO				Cele.Transcript_C26E6.2, Cele.Transcript_F09E5.10, Cele.Transcript_F09E5.9, Cele.Transcript_T14F9.4a, Cele.Transcript_Y11D7A.12a, Cele.Transcript_Y11D7A.13	Cscu.CSCU001278-RA, Cscu.CSCU001875-RA, Cscu.CSCU002105-RA, Cscu.CSCU003884-RA, Cscu.CSCU007768-RA, Cscu.CSCU008549-RA, Cscu.CSCU008550-RA, Cscu.CSCU009451-RA, Cscu.CSCU024956-RA			Dpul.mRNA11080, Dpul.mRNA12559, Dpul.mRNA14103, Dpul.mRNA15985	Dpte.g11464.t1			Isca.ISCW000306-RA, Isca.ISCW000614-RA, Isca.ISCW001072-RA, Isca.ISCW002834-RA, Isca.ISCW003892-RA, Isca.ISCW004796-RA, Isca.ISCW004797-RA, Isca.ISCW008255-RA, Isca.ISCW011516-RA, Isca.ISCW017441-RA, Isca.ISCW022066-RA	Lpol.rna4914, Lpol.rna832, Lpol.rna8380	Mocc.rna10034, Mocc.rna10036, Mocc.rna10073, Mocc.rna10082, Mocc.rna10134, Mocc.rna10438, Mocc.rna1049, Mocc.rna10522, Mocc.rna10689, Mocc.rna10888, Mocc.rna10889, Mocc.rna11028, Mocc.rna11204, Mocc.rna11345, Mocc.rna11436, Mocc.rna11437, Mocc.rna11439, Mocc.rna11444, Mocc.rna11716, Mocc.rna11759, Mocc.rna1190, Mocc.rna12220, Mocc.rna12325, Mocc.rna12405, Mocc.rna12406, Mocc.rna12574, Mocc.rna126…	Ptep.aug3.g11924.t1, Ptep.aug3.g12522.t1, Ptep.aug3.g12919.t1, Ptep.aug3.g14639.t1, Ptep.aug3.g14640.t1, Ptep.aug3.g16060.t1, Ptep.aug3.g16785.t1, Ptep.aug3.g17757.t1, Ptep.aug3.g18075.t1, Ptep.aug3.g18682.t1, Ptep.aug3.g18945.t2, Ptep.aug3.g24876.t1, Ptep.aug3.g25699.t2, Ptep.aug3.g27594.t1, Ptep.aug3.g27970.t3, Ptep.aug3.g3625.t1, Ptep.aug3.g6643.t1, Ptep.aug3.g8552.t2, Ptep.aug3.g8612.t1		Phum.transcript_PHUM417040-RA	Smar.transcript_SMAR000030-RA, Smar.transcript_SMAR001214-RA, Smar.transcript_SMAR001415-RA, Smar.transcript_SMAR001736-RA, Smar.transcript_SMAR002192-RA, Smar.transcript_SMAR002330-RA, Smar.transcript_SMAR003541-RA, Smar.transcript_SMAR003878-RA, Smar.transcript_SMAR004086-RA, Smar.transcript_SMAR004384-RA, Smar.transcript_SMAR004577-RA, Smar.transcript_SMAR005314-RA, Smar.transcript_SMAR007330-…		Tcas.transcript_TC001422_001, Tcas.transcript_TC005116_001, Tcas.transcript_TC005547_001, Tcas.transcript_TC011266_001, Tcas.transcript_TC011442_001, Tcas.transcript_TC011443_001
[truncated: 86,654 more rows]

## Sheet: Table_S8
Click on tabs at bottom to view each of Table S1-20.
Table S8. Orthogroups not present in a given arthropod species but present in all other arthropod species included in the Orthofinder analysis (Table S7). For each species the number of missing orthogroups is shown between brackets.
A. lycopersici (315)				# proteins
Orthogroup ID	InterPro domain	InterPro description	GO Drosophila	Alyc*	Agam	Bmor	Cele	Cscu	Drer	Dpul	Dpte	Dmel	Hsap	Isca	Lpol	Mocc	Ptep	Phum	Smar	Turt	Tcas
[truncated: 1,368 more rows]

## Sheet: Table_S9
Click on tabs at bottom to view each of Table S1-20.
[truncated: 38 more rows]

## Sheet: Table_S10
Click on tabs at bottom to view each of Table S1-20.
[truncated: 393 more rows]

[truncated: 12 more sheets: Table_S11, Table_S12.1, Table_S12.2, Table_S13.1, Table_S13.2, Table_S14, Table_S15, Table_S16, Table_S17, Table_S18, Table_S19, Table_S20]
