# Supplementary material for: Genome streamlining in a minute herbivore that manipulates its host plant
Source: eLife. 2020 Oct 23;9:e56689. doi: 10.7554/eLife.56689 (PMC7738191; doi:10.7554/eLife.56689)
Supplement: Supplementary file 4. [file elife-56689-supp4.xlsx]

## Sheet: large_OGs
ID	Alyc	Agam	Bmor	Cele	Cscu	Drer	Dpul	Dpte	Dmel	Hsap	Isca	Lpol	Mocc	Ptep	Phum	Smar	Turt	Tcas
OG0000000	16	116	73	22	252	959	36	36	85	475	156	217	87	191	56	57	21	109
OG0000001	11	4	20	3	231	11	9	12	6	5	22	27	32	1949	5	56	11	63
OG0000002	0	1	13	4	160	5	0	40	0	2	45	22	504	324	2	43	1	112
OG0000003	29	39	54	32	77	121	34	33	43	93	52	102	33	56	40	51	48	43
OG0000004	0	0	8	1	274	52	3	27	0	0	44	15	173	212	7	14	2	140
OG0000005	18	99	51	4	47	98	73	19	117	78	39	42	40	40	29	33	30	38
OG0000006	0	0	4	1	96	0	1	27	0	0	9	0	301	329	0	47	0	28
OG0000007	4	1	13	0	69	2	1	11	1	2	10	7	49	444	2	6	2	59
OG0000009	1	0	17	0	49	0	1	33	1	0	0	0	268	101	0	122	0	12
OG0000010	21	4	3	0	60	0	5	24	2	0	104	84	80	154	1	6	39	4
OG0000011	5	1	18	13	161	1	0	6	1	1	2	43	141	109	0	14	1	12
OG0000013	0	2	3	0	294	1	0	4	0	18	1	47	53	63	0	0	0	5
OG0000015	10	17	19	15	25	108	17	12	16	34	14	58	12	24	17	16	24	15
OG0000017	2	7	9	117	29	73	44	4	4	45	9	36	8	26	9	9	7	13
OG0000018	0	104	84	0	0	0	136	0	34	0	1	1	0	2	15	13	0	57
OG0000019	0	0	1	0	223	6	0	5	0	3	10	56	72	48	0	3	0	12
OG0000020	0	4	1	4	6	375	4	1	3	4	6	8	0	2	1	5	2	0
OG0000028	2	20	8	34	7	155	17	2	30	65	1	15	3	11	3	17	0	3
OG0000032	0	6	15	0	178	21	4	4	5	1	40	4	6	36	0	14	0	14
OG0000033	2	1	7	2	115	1	4	2	2	10	21	18	67	72	2	4	0	3
OG0000035	1	3	2	4	9	170	7	1	4	82	3	4	1	4	1	5	3	3
OG0000036	0	0	0	6	9	0	4	1	0	0	11	3	222	19	1	25	0	6
OG0000041	0	3	14	0	160	6	0	4	2	3	21	13	10	44	2	3	0	6
OG0000042	0	1	3	1	5	1	1	1	1	1	13	1	1	250	1	6	1	2
OG0000046	1	2	3	2	21	29	4	6	1	13	13	16	132	7	3	6	11	2
OG0000092	0	2	1	23	121	5	2	1	1	3	2	8	4	2	2	0	2	2
OG0000095	1	2	1	0	3	3	2	0	1	2	12	5	9	133	1	1	1	1
OG0000117	1	2	4	5	5	8	101	1	2	4	4	5	3	4	3	3	1	4
OG0000121	0	0	1	0	3	1	1	0	0	0	4	1	3	8	0	134	0	2

## Sheet: small_OGs
ID	Alyc	Agam	Bmor	Cele	Cscu	Drer	Dpul	Dpte	Dmel	Hsap	Isca	Lpol	Mocc	Ptep	Phum	Smar	Turt	Tcas
OG0000014	10	42	27	18	48	6	9	17	38	7	73	13	18	47	11	11	12	63
OG0000016	15	5	13	2	63	6	6	12	4	3	43	71	29	72	5	70	27	5
OG0000021	2	31	53	20	32	9	17	14	22	8	56	22	29	8	7	9	45	41
OG0000023	9	19	16	13	28	36	17	17	19	33	20	54	24	32	16	21	20	19
OG0000024	13	12	17	7	37	20	21	7	12	12	98	12	27	61	10	18	4	17
OG0000025	12	16	21	13	28	40	16	15	19	35	16	44	17	30	19	21	19	18
OG0000026	4	10	23	0	39	0	21	15	8	1	57	83	19	53	10	10	36	9
OG0000027	12	8	10	15	60	1	20	14	14	0	58	28	28	61	14	13	18	22
OG0000029	5	11	38	19	43	19	20	6	24	18	27	33	32	29	10	17	12	14
OG0000030	1	11	6	45	13	51	16	2	5	22	45	11	5	50	6	12	57	7
OG0000031	4	19	17	6	28	28	9	12	29	34	37	22	12	28	13	10	21	23
OG0000037	1	51	4	5	34	45	5	1	14	24	27	47	1	19	2	16	2	6
OG0000038	1	14	8	1	34	20	23	2	3	13	80	21	10	48	5	10	2	6
OG0000039	0	26	38	76	0	28	28	0	35	22	0	0	0	0	4	16	0	27
OG0000040	7	21	28	0	24	9	20	9	28	10	18	15	21	38	9	3	13	18
OG0000044	2	12	4	27	44	14	24	2	11	3	4	17	6	84	4	11	11	2
OG0000045	0	23	28	0	63	5	12	1	17	5	26	2	19	37	10	7	5	21
OG0000047	6	40	10	5	15	1	38	8	27	0	9	32	11	25	7	7	7	19
OG0000048	9	24	32	1	57	1	12	8	14	1	8	6	6	24	15	11	17	18
OG0000050	1	5	6	16	15	27	43	9	8	14	42	18	12	12	5	6	9	9
OG0000051	7	11	8	8	14	14	7	15	13	11	13	14	22	16	5	11	39	26
OG0000052	2	28	15	10	34	2	22	4	11	5	32	8	12	21	7	7	5	29
OG0000053	10	17	11	0	4	10	12	9	12	5	48	14	33	16	12	6	14	17
OG0000054	5	23	29	0	24	0	31	6	19	1	4	13	4	8	32	11	13	25
OG0000055	3	14	13	2	47	18	8	3	9	6	9	15	8	24	6	49	5	9
OG0000056	6	15	18	3	17	6	22	9	14	7	11	39	8	23	12	12	13	12
OG0000058	7	17	16	0	19	0	14	7	14	0	12	44	11	37	9	3	18	15
OG0000059	5	24	16	1	14	0	27	1	20	1	27	30	6	12	23	9	5	16
OG0000060	0	1	2	23	24	13	18	0	32	14	62	11	3	22	0	2	1	4
OG0000061	5	10	10	6	17	35	11	8	12	30	8	23	8	11	10	9	6	11
OG0000062	3	13	22	8	12	1	19	5	23	6	15	2	11	5	4	21	41	16
OG0000064	7	12	13	11	9	27	8	6	16	19	7	21	8	16	9	5	9	22
OG0000065	5	11	8	5	10	27	10	10	12	14	13	26	12	17	9	14	10	10
OG0000066	8	13	8	5	18	20	22	9	12	15	7	18	9	23	6	11	9	8
OG0000067	7	7	11	33	16	27	6	7	7	24	8	18	7	13	7	8	6	8
OG0000068	10	10	11	0	20	0	19	12	11	0	10	23	8	25	11	26	12	11
OG0000070	3	8	8	4	20	26	11	5	7	19	11	34	6	15	6	14	8	9
OG0000071	2	8	16	2	28	2	11	7	20	5	9	6	11	45	9	2	11	20
OG0000072	8	14	10	8	14	4	36	8	7	6	13	26	5	16	7	15	8	8
OG0000073	1	26	16	21	4	9	7	2	30	9	11	5	14	30	0	1	2	23
OG0000074	3	6	10	4	21	25	7	6	7	16	8	35	8	16	10	11	9	8
OG0000075	1	12	20	3	42	14	8	1	14	15	1	17	1	17	12	14	1	16
OG0000076	7	6	8	25	15	0	9	6	8	0	11	28	15	16	8	11	18	9
OG0000077	0	0	0	3	57	3	0	2	0	11	34	4	54	25	0	5	1	0
OG0000078	2	9	2	17	6	37	16	5	23	20	4	3	21	5	6	14	5	3
OG0000079	3	9	9	24	18	11	8	8	8	5	13	38	5	12	6	10	4	7
OG0000080	0	6	5	0	57	14	6	0	7	9	37	8	4	25	2	4	1	12
OG0000081	1	11	7	0	6	85	28	0	7	10	5	16	2	6	3	0	5	3
OG0000085	5	10	9	13	15	16	9	7	7	10	10	20	8	13	8	12	10	8
OG0000086	2	9	7	6	24	21	7	6	8	16	11	13	8	11	8	16	6	10
OG0000088	11	6	3	0	24	0	2	13	2	0	15	13	25	26	1	3	42	1
OG0000089	2	6	8	36	14	1	8	4	7	1	7	36	7	14	8	10	7	10
OG0000090	2	10	3	19	7	32	13	4	25	17	2	9	20	5	7	4	3	3
OG0000091	6	6	7	15	14	26	7	7	8	16	7	25	5	10	5	5	6	7
OG0000093	5	8	5	3	15	24	9	5	5	17	7	30	5	13	10	7	6	6
OG0000094	6	8	7	6	15	14	11	8	10	9	6	25	7	13	9	9	6	10
OG0000096	2	8	9	4	4	17	14	8	9	6	19	6	14	13	6	9	9	20
OG0000097	1	25	11	16	28	0	0	7	8	0	36	0	0	27	0	0	10	6
OG0000098	2	6	7	17	4	33	12	2	20	20	3	4	20	3	5	6	4	5
OG0000099	1	6	17	4	8	6	5	4	8	3	6	7	15	12	2	10	53	5
OG0000101	0	2	0	0	54	13	19	0	1	0	52	2	0	17	0	5	0	6
OG0000102	2	1	1	45	5	7	13	5	1	12	23	6	7	17	4	2	12	7
OG0000103	1	5	6	0	13	1	27	2	14	0	13	10	5	32	8	22	5	5
OG0000104	4	6	7	4	13	19	6	4	6	11	12	32	9	9	6	4	9	6
OG0000105	4	3	3	4	8	17	4	3	6	8	10	6	6	65	3	5	9	3
OG0000106	2	1	5	3	14	67	10	5	2	9	4	15	5	7	3	4	4	5
OG0000107	3	11	5	2	14	6	16	5	8	5	13	19	7	15	4	8	7	17
OG0000108	5	3	3	4	8	21	12	2	6	6	2	5	16	27	4	2	24	14
OG0000109	1	9	8	5	17	11	3	5	10	12	21	9	8	13	2	9	9	12
OG0000110	15	16	11	8	7	8	21	7	12	3	7	4	0	2	9	3	19	11
OG0000111	5	15	13	8	0	0	15	4	14	0	40	9	11	0	7	1	0	21
OG0000112	0	2	20	0	58	2	13	0	0	0	2	2	18	37	1	0	2	5
OG0000113	2	8	3	16	4	33	18	4	23	15	1	2	16	2	6	4	3	1
OG0000114	3	4	3	2	18	23	5	6	4	16	11	21	8	13	4	5	6	8
OG0000115	5	7	5	4	14	14	5	10	9	9	5	17	8	17	6	8	9	8
OG0000116	4	8	4	6	17	9	23	7	6	7	15	9	8	11	6	3	9	8
OG0000119	2	7	12	17	14	11	10	5	10	8	13	8	1	12	5	4	10	10
OG0000120	0	15	4	28	14	8	7	1	24	6	6	6	8	12	1	9	0	9
OG0000122	0	1	0	1	22	1	0	2	1	1	30	17	7	65	1	1	5	1
OG0000124	1	24	9	0	4	0	3	4	24	1	13	11	3	13	3	2	19	21
OG0000125	1	0	2	4	17	3	6	16	1	0	9	12	14	68	1	0	0	0
OG0000126	1	2	1	5	13	16	45	2	2	6	11	17	6	10	1	3	9	4
OG0000127	1	5	7	8	5	22	5	3	3	7	16	29	5	12	3	8	10	4
OG0000128	6	11	10	6	7	5	7	6	12	3	4	9	14	8	10	7	12	15
OG0000130	3	8	6	6	11	17	8	5	7	12	5	28	8	8	5	4	4	5
OG0000131	2	14	7	2	7	6	7	3	13	4	10	5	9	24	5	16	5	11
OG0000132	0	17	29	0	3	0	4	0	23	0	0	8	1	5	17	3	0	40
OG0000133	5	7	9	2	13	13	9	5	12	8	7	19	5	9	6	6	6	8
OG0000134	2	5	4	7	15	16	3	6	7	13	17	15	6	17	5	5	2	3
OG0000135	1	3	6	2	20	5	10	7	4	4	6	22	10	15	8	11	8	4
OG0000136	3	5	4	3	22	20	7	5	3	12	7	21	3	7	6	4	5	8
OG0000137	2	16	11	9	7	8	23	3	14	9	3	7	6	8	3	5	4	7
OG0000143	5	10	6	7	7	9	6	6	7	13	8	14	8	10	5	6	6	6
OG0000144	2	1	9	5	69	5	1	1	2	3	8	2	11	13	1	4	0	2
OG0000146	2	7	12	1	15	2	18	3	11	2	12	8	13	6	7	2	4	11
OG0000147	3	36	14	0	5	3	1	6	12	0	3	8	16	9	4	1	1	13
OG0000148	2	4	3	7	26	5	1	5	2	5	19	7	3	28	1	5	7	5
OG0000149	1	19	11	2	8	12	19	2	16	7	4	6	0	6	5	4	3	10
OG0000150	3	6	7	7	6	11	6	9	13	9	8	6	10	9	7	5	3	9
OG0000151	7	3	17	22	2	2	3	12	5	1	4	8	4	1	2	8	32	1
OG0000152	3	2	5	8	18	1	7	3	2	2	16	14	4	25	3	10	9	2
OG0000154	3	12	13	11	4	7	7	3	8	10	3	4	4	6	7	2	11	17
OG0000155	4	6	7	9	7	10	6	6	7	15	9	8	7	6	6	4	9	6
OG0000159	4	5	8	2	6	0	11	9	6	0	12	19	4	11	4	8	10	9
OG0000160	2	4	4	2	19	18	4	4	5	13	6	17	5	8	4	4	5	4
OG0000161	1	3	5	10	12	0	0	1	16	0	7	8	11	19	3	11	11	9
OG0000162	5	0	2	1	22	0	2	0	0	0	10	15	24	41	0	2	1	1
OG0000163	2	5	4	13	9	13	6	5	4	8	7	17	6	11	6	2	5	3
OG0000165	3	4	6	3	18	10	3	6	5	8	10	16	6	7	4	4	8	4
OG0000166	2	3	3	9	9	28	3	4	3	16	3	16	7	5	3	3	3	4
OG0000167	3	6	4	3	11	20	5	6	5	12	5	11	6	8	4	7	3	5
OG0000168	2	3	4	3	15	24	3	6	4	9	5	10	4	10	5	6	6	4
OG0000169	3	16	4	1	3	2	5	6	8	1	12	4	9	11	2	4	24	8
OG0000171	2	3	4	0	80	0	0	0	1	0	22	1	0	4	0	2	2	1
OG0000172	3	4	8	3	18	4	3	5	3	3	5	13	7	19	6	3	10	4
OG0000173	3	4	4	3	7	15	4	3	4	12	4	22	6	9	6	5	5	4
OG0000174	0	1	1	4	3	3	30	0	3	1	2	3	2	63	1	0	0	3
OG0000175	5	8	7	11	4	12	2	6	7	10	6	10	4	7	5	2	7	6
OG0000176	0	4	3	2	6	9	2	0	4	6	11	6	3	1	3	53	2	4
OG0000177	0	1	4	0	50	1	1	0	0	0	6	0	28	10	0	10	0	7
OG0000179	5	3	4	0	4	1	25	12	3	0	10	0	7	2	7	22	9	3
OG0000180	4	5	5	6	4	19	3	4	5	11	5	14	5	6	5	4	5	6
OG0000181	3	6	13	0	13	3	4	7	5	1	13	6	12	8	3	5	6	8
OG0000182	5	2	5	2	14	0	5	6	5	0	9	17	4	16	3	8	12	3
OG0000183	3	0	0	10	50	0	0	1	0	0	3	0	9	21	2	7	3	7
OG0000184	2	4	4	4	11	13	3	4	4	10	7	12	5	11	5	5	6	6
OG0000185	5	5	5	6	7	11	7	5	5	11	6	7	5	7	6	6	6	5
OG0000186	1	9	13	7	15	6	2	5	22	0	10	1	3	9	0	5	0	7
OG0000187	1	0	0	1	7	3	1	6	0	2	6	5	34	10	0	2	37	0
OG0000190	4	5	3	5	6	5	6	5	6	7	4	8	5	12	8	7	9	9
OG0000191	7	3	5	7	5	13	6	4	10	8	2	8	7	3	3	4	14	5
OG0000192	4	12	4	4	2	20	8	3	4	8	6	8	3	6	4	7	4	6
OG0000194	2	4	6	12	7	6	5	3	6	5	5	14	5	9	4	5	9	5
OG0000195	4	2	1	0	7	0	44	1	2	0	6	13	10	10	2	2	5	3
OG0000196	2	4	6	2	10	6	5	5	2	3	15	21	2	11	3	3	8	4
OG0000198	3	7	15	3	9	2	5	4	6	2	5	9	8	4	5	2	9	13
OG0000199	1	10	7	0	2	3	16	2	3	1	2	6	2	14	3	4	31	4
OG0000200	6	5	5	1	8	2	2	2	5	1	7	3	6	43	2	3	5	4
OG0000201	0	1	1	10	6	2	30	0	1	4	19	1	2	31	0	1	0	1
OG0000203	3	3	2	3	6	25	6	3	3	16	5	7	3	7	2	8	3	4
OG0000204	1	3	5	0	19	0	13	1	3	0	13	6	3	27	4	4	2	5
OG0000205	2	7	6	2	9	9	3	6	5	5	5	12	8	10	6	4	5	5
OG0000207	0	3	5	1	10	4	1	1	4	3	33	5	6	12	5	8	1	6
OG0000208	3	2	1	4	8	7	4	4	2	8	10	5	14	20	2	3	8	2
OG0000209	1	6	2	7	7	22	5	3	23	8	5	2	3	5	2	4	1	1
OG0000210	2	5	4	10	7	11	6	3	5	6	3	16	4	6	5	5	4	5
OG0000211	1	1	3	0	19	24	3	1	2	12	5	9	8	11	2	3	1	2
OG0000212	1	6	4	1	18	12	3	2	2	8	8	5	4	14	3	4	3	9
OG0000215	1	5	5	8	8	2	8	4	3	3	7	16	8	11	5	5	2	5
OG0000216	5	5	6	3	8	0	8	6	5	0	5	21	5	7	5	4	8	5
OG0000217	1	7	2	6	9	22	2	2	2	13	7	10	2	6	4	5	1	5
OG0000218	1	4	5	1	4	20	5	1	11	7	4	13	3	4	5	10	2	6
OG0000219	1	4	3	20	12	9	6	2	4	5	1	10	2	9	4	5	4	4
OG0000220	2	7	6	3	6	10	2	3	7	8	3	13	2	6	5	12	2	8
OG0000221	2	4	4	4	7	20	5	3	5	8	3	13	5	7	5	4	3	3
OG0000222	5	5	3	3	6	11	1	4	5	6	2	7	3	14	3	20	1	5
OG0000223	1	8	1	16	4	18	4	5	4	17	3	5	1	7	2	4	2	2
OG0000227	1	4	9	1	5	19	2	3	6	12	3	8	5	3	6	5	3	8
OG0000229	3	5	4	2	12	9	5	4	5	6	3	10	4	10	5	5	5	5
OG0000230	0	2	2	23	8	3	7	1	4	4	5	13	1	9	5	6	5	4
OG0000231	4	5	3	5	6	7	8	4	7	6	4	7	5	7	4	5	4	10
OG0000232	1	8	8	3	5	3	3	3	7	4	7	18	6	6	3	3	5	7
OG0000233	1	4	3	4	7	14	4	3	4	10	4	20	3	4	4	4	4	3
OG0000234	3	4	4	3	7	17	3	3	4	11	2	14	3	6	4	4	3	4
OG0000235	1	4	4	9	6	12	5	4	4	9	7	6	6	7	5	4	2	4
OG0000236	0	1	7	2	15	0	1	3	1	0	47	7	1	3	1	4	4	2
OG0000237	2	5	5	3	4	9	4	4	5	5	5	12	6	10	4	4	7	4
OG0000238	3	6	4	5	12	6	6	5	5	5	4	8	6	6	5	4	4	4
OG0000239	3	3	4	13	7	1	3	6	5	3	5	2	3	17	2	5	4	12
OG0000240	2	4	9	5	4	9	1	4	4	10	4	11	5	6	6	3	6	5
OG0000241	1	3	7	1	9	19	4	4	2	12	6	8	5	5	5	3	1	3
OG0000242	1	1	0	0	5	4	29	1	0	3	19	10	2	11	1	9	1	1
OG0000243	1	9	4	16	4	11	7	5	12	6	3	8	1	3	3	1	1	2
OG0000244	1	5	6	2	7	7	7	3	4	5	4	11	6	11	5	3	5	5
OG0000246	4	3	5	0	13	9	5	1	4	7	6	11	5	6	4	4	6	3
OG0000247	1	3	4	3	9	5	5	1	4	4	3	22	3	13	5	4	4	3
OG0000248	2	4	6	9	4	4	0	3	5	3	28	3	4	4	4	2	5	6
OG0000249	2	6	4	3	8	11	6	4	3	6	6	11	3	7	5	3	4	4
OG0000250	1	20	6	0	6	0	3	0	15	0	3	9	2	6	3	1	4	16
OG0000251	1	5	4	2	6	10	7	3	4	6	3	14	4	8	4	6	3	5
OG0000252	3	3	2	9	21	7	1	1	5	3	18	4	4	5	3	2	2	1
OG0000253	3	5	2	6	27	5	8	3	5	3	2	6	6	3	3	2	3	2
OG0000254	3	4	5	3	8	7	4	3	7	5	3	11	8	7	6	4	3	3
OG0000255	2	8	3	3	4	5	2	1	3	7	5	3	4	4	2	9	26	3
OG0000256	0	2	1	1	7	19	4	1	2	20	3	14	1	7	3	4	1	4
OG0000257	0	8	3	4	5	17	11	0	3	13	2	8	1	5	5	3	1	5
OG0000259	0	0	0	4	3	6	3	11	0	12	14	3	2	9	0	0	27	0
OG0000260	1	2	6	1	19	6	3	4	3	4	6	11	1	8	3	6	6	3
OG0000261	3	11	14	5	2	2	4	4	11	4	1	6	1	4	6	1	3	11
OG0000262	2	3	3	3	5	19	6	1	2	19	2	9	2	8	2	3	1	3
OG0000263	1	6	7	13	4	8	1	4	13	3	2	3	4	7	3	5	6	2
OG0000264	0	2	4	4	12	6	6	3	4	5	11	6	4	10	1	6	5	3
OG0000265	2	2	2	1	8	14	11	3	1	6	7	8	2	6	4	5	4	5
OG0000266	1	3	1	2	3	6	9	2	16	3	14	6	1	8	1	11	2	2
OG0000267	1	3	4	2	16	12	3	1	3	6	3	14	2	9	3	2	2	5
OG0000268	1	4	4	2	7	10	3	3	4	9	6	13	4	6	4	3	3	4
OG0000269	2	1	0	5	20	8	5	2	0	7	6	11	0	10	1	4	6	1
OG0000270	4	6	7	2	4	4	3	5	7	5	7	4	5	6	7	4	3	6
OG0000271	6	5	1	4	6	8	4	2	5	6	4	9	5	8	3	6	3	3
OG0000272	4	4	3	1	9	8	4	4	2	5	3	12	4	7	3	2	10	3
OG0000273	15	1	1	1	5	1	1	13	2	1	3	6	4	2	1	1	29	1
OG0000274	1	7	11	0	0	3	1	1	13	4	4	2	1	13	1	18	1	7
OG0000275	3	3	3	3	6	12	3	4	4	7	3	14	3	4	3	3	5	5
OG0000276	3	14	8	2	4	5	5	2	11	2	3	8	2	5	2	2	5	5
OG0000277	3	2	2	1	8	13	2	6	2	9	4	15	4	5	2	5	3	2
OG0000278	1	2	3	1	7	8	6	3	2	6	4	17	4	7	3	5	5	4
OG0000279	2	3	1	0	11	3	17	0	2	2	7	16	4	9	1	5	3	2
OG0000280	0	0	1	2	61	3	0	3	0	0	6	0	2	4	2	0	0	3
OG0000282	3	5	6	5	6	8	4	3	3	6	2	6	4	7	3	6	5	4
OG0000283	1	2	1	3	3	13	6	6	3	9	4	9	6	6	3	2	6	3
OG0000284	3	4	3	1	5	14	4	3	3	8	2	12	3	4	4	4	6	3
OG0000285	2	3	5	1	5	13	3	6	3	7	4	8	2	4	4	10	1	5
OG0000286	2	9	9	1	7	0	5	1	11	0	5	5	3	6	6	5	4	7
OG0000287	1	12	2	1	8	15	2	1	5	7	3	8	2	10	2	4	1	2
OG0000288	2	1	2	1	25	1	4	3	2	4	6	10	2	7	1	9	4	1
OG0000289	7	2	5	0	7	0	7	5	3	0	6	11	10	5	3	4	5	5
OG0000290	2	3	2	2	9	5	2	5	3	2	6	18	6	5	4	6	2	3
OG0000291	2	2	3	1	9	6	22	2	2	1	13	2	4	5	1	1	6	2
OG0000292	1	14	1	0	0	3	11	4	6	2	2	1	4	0	0	1	34	0
OG0000293	1	2	4	3	6	8	2	4	3	7	10	8	1	4	7	5	5	4
OG0000294	1	0	1	1	5	9	1	2	3	4	5	2	39	1	2	1	6	1
OG0000295	2	5	2	2	7	12	4	2	5	8	4	13	2	3	3	3	3	3
OG0000297	2	6	3	5	5	10	6	2	6	7	1	11	4	3	2	3	3	4
OG0000298	1	3	1	6	5	13	1	4	2	7	7	12	4	5	3	4	3	2
OG0000299	1	1	2	1	7	1	4	1	0	1	2	7	18	6	3	13	13	2
OG0000300	1	1	1	0	6	0	3	1	1	1	3	3	1	1	1	2	55	2
OG0000301	0	2	2	1	7	13	2	2	3	8	7	9	4	5	4	4	3	7
OG0000302	0	3	1	11	6	2	3	3	1	1	8	1	0	1	0	1	31	10
OG0000304	2	4	3	2	10	11	4	2	3	7	4	7	3	6	3	4	3	4
OG0000305	1	6	5	0	2	2	16	5	6	2	5	3	3	7	7	4	2	6
OG0000306	3	3	5	2	4	10	3	2	5	8	3	12	3	5	2	4	4	4
OG0000307	2	2	2	1	5	5	3	3	2	6	13	11	5	9	3	4	4	2
OG0000308	0	4	3	2	11	9	2	2	3	6	5	8	3	7	4	5	5	3
OG0000310	1	2	4	4	14	12	3	1	2	7	2	9	1	6	3	6	2	2
OG0000311	1	11	8	0	4	4	4	4	12	4	2	5	3	10	4	1	1	3
OG0000312	1	4	2	5	7	11	7	1	4	8	6	6	3	4	2	4	1	4
OG0000313	3	5	3	2	6	13	2	2	2	7	1	15	3	5	2	3	3	3
OG0000314	1	1	5	16	4	4	2	4	4	4	5	2	1	11	5	7	2	2
OG0000316	3	4	3	3	4	10	5	4	4	6	3	7	4	5	4	4	2	4
OG0000317	3	5	4	0	6	0	3	2	2	0	11	15	6	8	4	2	4	4
OG0000318	3	4	3	9	5	6	4	3	3	6	3	6	5	3	3	6	2	4
OG0000319	1	6	2	2	2	28	2	1	3	14	1	5	1	2	2	1	1	4
OG0000320	0	6	9	0	1	0	1	1	9	0	4	5	1	2	2	2	22	13
OG0000321	0	1	1	2	8	1	1	1	2	1	1	1	1	53	1	1	1	1
OG0000324	2	4	2	3	6	13	3	2	3	6	2	11	3	5	3	3	3	3
OG0000325	2	3	2	5	5	16	4	2	2	9	2	7	5	3	2	2	4	2
OG0000326	2	4	6	3	4	0	4	3	10	0	2	5	4	7	5	4	8	6
OG0000327	2	4	4	2	5	12	4	3	4	8	2	5	4	3	4	2	4	5
OG0000328	2	6	4	3	6	6	3	4	5	4	3	6	2	6	5	3	5	4
OG0000329	1	1	1	2	2	30	1	1	2	20	3	1	1	2	3	3	1	2
OG0000330	3	2	5	1	12	12	2	1	2	8	2	9	2	3	3	3	3	3
OG0000331	3	1	1	0	6	0	1	3	1	0	11	15	11	5	1	12	4	1
OG0000332	3	3	4	4	7	9	3	3	3	8	2	8	3	4	3	3	3	3
OG0000333	1	1	2	0	18	0	3	2	0	0	12	3	3	13	1	16	1	0
OG0000334	0	1	2	0	15	2	3	0	1	3	1	2	0	43	1	1	0	1
OG0000335	4	4	4	1	6	3	7	2	4	2	5	10	2	6	4	5	3	3
OG0000336	3	2	2	4	4	9	4	2	5	4	4	5	7	9	1	3	4	3
OG0000337	1	3	2	5	5	6	3	2	3	3	4	9	2	5	4	5	10	3
OG0000338	2	2	3	12	6	5	2	2	10	3	2	9	6	2	1	3	2	3
OG0000339	2	4	4	2	4	3	11	4	3	2	4	7	5	3	6	2	5	4
OG0000340	1	3	1	3	6	8	1	3	4	5	2	18	3	5	3	2	3	4
OG0000341	1	1	1	1	2	55	1	1	1	1	0	1	1	3	1	2	1	1
OG0000343	1	4	5	3	5	4	5	1	3	3	4	13	3	5	4	3	4	4
OG0000344	1	2	4	2	7	12	4	2	2	8	4	9	1	4	2	3	2	5
OG0000345	3	3	3	3	4	10	3	4	3	4	4	9	4	4	3	4	3	3
OG0000346	1	5	6	2	9	5	2	4	5	4	1	7	2	7	5	1	4	4
OG0000348	3	3	4	2	4	13	3	2	3	9	2	10	2	2	2	3	2	4
OG0000349	3	3	4	2	6	11	4	2	3	9	2	6	3	4	3	3	3	2
OG0000350	1	2	3	0	7	7	4	3	2	4	5	13	5	6	4	2	2	3
OG0000351	2	3	1	7	2	11	2	3	1	10	3	7	6	4	2	3	4	2
OG0000352	1	2	1	8	2	4	3	4	4	3	7	11	4	3	2	3	10	1
OG0000353	1	21	5	1	3	1	7	6	5	1	1	1	1	2	4	1	6	6
OG0000354	2	3	4	4	3	9	1	0	3	5	5	3	3	2	2	4	17	3
OG0000355	0	9	6	1	5	2	8	1	6	2	5	3	1	10	5	3	1	5
OG0000356	0	2	3	2	3	8	16	3	2	6	7	4	3	4	3	1	3	3
OG0000357	1	1	1	1	3	5	3	1	1	10	1	4	1	4	2	26	6	1
OG0000358	3	3	3	3	5	12	3	3	3	8	3	4	2	4	3	3	4	3
OG0000359	2	2	4	2	13	4	2	3	2	5	1	9	2	6	3	2	8	2
OG0000360	5	2	2	1	5	6	4	3	3	7	5	6	3	4	3	4	4	5
OG0000361	3	2	2	2	2	11	2	4	3	10	2	15	2	3	2	2	3	2
OG0000362	2	5	4	1	3	8	9	2	3	4	10	4	4	3	3	1	3	3
OG0000363	2	1	1	0	5	2	1	6	1	1	6	22	5	4	2	2	10	1
OG0000365	2	3	4	0	2	0	11	2	5	0	2	6	8	7	2	4	4	9
OG0000366	1	5	5	7	1	2	3	4	5	1	14	4	3	2	6	0	1	7
OG0000367	1	1	2	1	19	0	2	2	1	0	20	5	2	3	1	8	1	2
OG0000368	1	1	1	4	5	23	1	2	2	14	1	10	1	1	1	1	1	1
OG0000369	2	1	1	3	3	18	7	2	1	13	2	8	2	2	1	2	2	1
OG0000370	2	1	1	5	34	2	1	4	1	2	1	1	1	1	1	7	5	1
OG0000371	1	2	1	2	7	12	2	2	2	10	3	6	3	6	2	4	4	2
OG0000372	0	5	4	1	16	1	1	2	2	1	3	15	3	8	2	2	4	1
OG0000373	0	0	1	0	1	2	1	58	0	2	1	2	1	1	0	1	0	0
OG0000376	2	3	3	0	4	15	9	2	1	8	4	5	2	3	1	3	2	3
OG0000377	2	2	2	1	2	40	4	1	1	1	1	3	1	4	1	1	2	1
OG0000378	1	3	2	1	9	6	3	3	4	6	3	8	2	3	1	8	4	3
OG0000379	1	1	1	44	3	4	1	2	1	2	0	3	2	1	1	1	1	1
OG0000380	1	3	4	0	8	1	2	2	4	1	6	11	3	7	4	4	2	7
OG0000381	4	2	2	1	4	9	2	4	2	6	4	6	4	7	2	2	7	2
OG0000382	1	2	1	8	5	1	26	3	1	0	5	6	1	1	4	2	1	2
OG0000383	0	3	5	1	10	8	4	2	2	4	3	9	2	3	2	6	3	3
OG0000384	2	2	3	2	11	4	4	4	2	10	3	3	3	5	3	3	2	3
OG0000385	2	4	3	4	4	5	6	3	8	4	2	4	5	4	3	3	1	4
OG0000386	1	2	3	5	1	15	5	6	1	11	1	1	3	6	3	1	2	2
OG0000387	1	2	2	1	6	11	2	2	3	6	3	10	4	5	3	3	3	2
OG0000388	0	6	20	1	4	7	2	2	5	4	2	4	2	5	0	1	2	2
OG0000389	0	1	2	0	3	0	10	1	0	0	27	2	3	0	1	1	18	0
OG0000393	4	1	1	3	4	10	2	2	1	8	1	3	9	10	1	3	4	1
OG0000394	3	2	0	3	7	13	2	1	2	10	2	7	0	6	1	4	4	1
OG0000395	2	5	4	2	5	2	5	3	5	2	2	5	2	7	4	3	4	6
OG0000396	1	1	1	1	37	1	1	1	6	1	1	1	1	2	1	5	4	1
OG0000397	2	3	3	1	6	7	6	2	3	7	2	6	4	5	3	3	1	3
OG0000398	3	2	3	5	3	5	3	5	2	4	3	6	5	5	3	4	3	3
OG0000399	1	5	6	0	4	1	15	3	7	1	6	2	3	2	5	1	1	4
OG0000400	0	8	3	0	8	1	0	0	12	9	4	3	8	4	1	1	3	2
OG0000401	4	2	2	3	8	5	2	2	2	4	4	13	3	4	2	2	2	2
OG0000402	2	2	2	3	4	9	3	4	2	5	3	6	6	4	2	3	4	2
OG0000403	2	4	2	3	2	1	6	4	3	1	5	2	6	3	5	3	5	9
OG0000404	1	2	2	0	8	8	4	1	2	10	2	10	1	7	2	2	1	3
OG0000405	0	5	4	0	2	13	8	2	3	7	8	5	0	4	2	1	0	2
OG0000406	0	2	2	3	2	30	0	1	0	3	7	7	1	2	1	4	1	0
OG0000409	3	3	3	3	6	6	2	2	4	4	3	6	3	4	3	3	4	3
OG0000410	4	3	3	3	3	6	4	3	3	4	4	4	3	4	4	3	4	3
OG0000411	1	3	3	7	7	7	2	3	9	4	1	5	2	2	2	1	3	3
OG0000412	1	3	3	2	2	2	4	4	5	2	17	3	3	3	3	2	3	3
OG0000413	1	0	0	3	10	5	4	2	0	6	16	6	5	1	1	4	1	0
OG0000414	0	3	3	1	5	1	1	1	3	1	3	5	1	26	2	6	0	3
OG0000415	0	9	6	0	3	1	3	1	4	1	28	2	1	2	1	0	0	3
OG0000416	1	1	1	21	2	1	3	4	2	2	2	10	2	4	2	2	2	2
OG0000417	2	2	5	3	5	6	3	2	7	3	4	5	2	6	2	1	4	2
OG0000418	1	3	2	5	2	3	6	3	4	1	6	5	4	5	3	4	5	2
OG0000419	1	1	1	7	3	5	6	2	1	5	2	12	2	6	2	3	4	1
OG0000420	1	1	3	1	28	2	3	1	2	3	1	2	1	1	1	1	1	11
OG0000421	4	3	1	3	6	6	2	4	2	7	2	7	1	5	2	4	4	1
OG0000422	2	1	2	2	4	9	9	4	2	4	2	6	2	5	3	2	2	3
OG0000423	3	2	1	1	5	4	7	1	2	2	2	6	4	20	1	1	1	1
OG0000424	1	3	3	2	2	5	4	1	4	2	3	9	6	5	6	3	2	3
OG0000425	1	2	4	6	3	2	5	2	4	4	4	6	3	4	4	3	4	3
OG0000426	3	3	5	1	4	1	6	3	6	2	8	3	3	2	2	1	2	9
OG0000427	1	1	1	1	2	5	2	1	3	3	1	3	1	1	1	32	3	2
OG0000428	0	3	5	0	9	7	4	1	3	4	3	13	1	4	1	3	1	2
OG0000429	0	1	2	0	5	18	1	0	1	7	0	21	0	0	2	5	0	1
OG0000430	0	5	2	0	14	0	22	0	2	2	8	3	0	2	1	2	0	1
OG0000431	0	1	1	4	2	5	1	17	1	3	1	1	13	4	1	6	2	1
OG0000435	2	2	3	1	5	5	4	4	4	3	3	8	2	6	4	2	1	4
OG0000436	1	2	4	1	7	8	2	3	1	5	4	7	2	4	4	3	3	2
OG0000437	2	7	2	2	2	4	5	1	6	2	2	4	2	2	6	2	2	10
OG0000438	2	0	0	5	4	6	6	4	0	5	5	8	2	6	1	1	8	0
OG0000439	3	1	2	3	5	7	5	3	1	6	3	7	3	3	3	3	2	3
OG0000440	1	0	0	0	12	2	0	1	0	1	1	0	5	37	0	2	1	0
OG0000441	1	2	1	4	2	25	2	1	2	12	1	4	1	2	1	0	1	1
OG0000442	1	2	2	3	11	7	2	1	2	6	2	6	3	8	2	1	2	2
OG0000443	0	3	14	0	3	5	2	0	5	3	3	3	1	3	4	3	0	11
OG0000444	0	3	3	2	6	13	2	1	2	9	1	7	2	3	2	3	1	3
OG0000449	5	3	4	3	3	6	3	2	3	5	3	3	3	3	3	3	4	3
OG0000450	3	2	10	1	1	2	0	5	3	1	6	1	3	6	3	4	8	3
OG0000451	3	2	4	2	5	5	5	3	2	5	3	4	2	4	3	2	5	3
OG0000452	2	3	3	2	6	4	1	3	4	4	5	5	3	5	3	3	2	4
OG0000453	1	8	4	1	5	3	4	2	3	2	5	8	2	2	4	3	2	3
OG0000454	3	3	4	4	12	1	0	6	2	5	1	5	1	2	5	3	2	3
OG0000455	0	2	9	0	9	2	0	0	5	1	3	4	0	10	3	3	2	9
OG0000456	0	2	3	2	3	12	3	1	2	9	4	6	2	3	3	2	2	3
OG0000458	2	3	4	2	7	7	4	1	3	4	1	3	1	4	5	4	2	4
OG0000459	2	4	3	3	5	0	4	3	3	0	6	7	3	4	3	4	3	4
OG0000460	1	3	5	1	11	2	2	2	3	2	3	7	2	5	3	4	1	4
OG0000461	5	1	2	4	2	1	2	1	2	1	2	2	2	1	1	1	26	5
OG0000462	1	3	5	2	4	3	4	2	5	3	3	6	3	3	3	4	2	5
OG0000463	1	2	2	2	4	11	2	2	2	7	2	9	4	3	2	2	2	2
OG0000464	2	0	2	21	3	0	0	16	1	0	1	2	5	3	1	2	1	1
OG0000465	3	2	2	2	4	7	1	3	8	5	1	4	1	2	2	3	8	3
OG0000466	3	1	1	2	2	9	4	6	2	6	1	3	1	4	3	3	4	5
OG0000467	3	2	2	7	2	5	2	4	2	3	3	4	6	4	2	2	3	4
OG0000468	1	5	4	2	4	2	3	2	4	2	3	9	1	4	4	3	3	4
OG0000469	2	1	2	5	4	5	3	4	1	4	4	7	2	5	1	3	6	1
OG0000470	0	1	1	2	9	3	2	1	2	3	7	13	4	2	2	6	0	2
OG0000473	2	2	2	3	7	6	2	4	3	5	4	4	2	2	2	2	5	2
OG0000474	1	1	6	1	10	3	6	2	1	2	0	14	1	4	1	3	2	1
OG0000475	1	3	1	3	4	3	3	2	2	3	6	5	4	3	2	10	1	3
OG0000476	1	7	10	1	8	4	1	1	3	5	2	7	2	2	2	1	1	1
OG0000477	1	2	1	2	1	16	3	1	3	14	1	3	0	2	1	3	3	2
OG0000478	1	2	2	2	5	10	1	1	2	7	2	9	1	5	3	3	1	2
OG0000479	1	1	2	2	6	5	4	5	1	1	2	17	2	3	1	3	2	1
OG0000480	1	2	3	1	4	7	4	4	2	6	2	4	2	7	3	2	1	4
OG0000481	1	3	0	1	2	4	1	0	0	0	1	0	1	22	0	1	22	0
OG0000482	0	2	1	2	5	11	2	2	2	9	5	4	3	5	2	2	0	2
OG0000484	0	3	3	2	5	7	9	3	2	3	1	6	1	3	3	3	3	2
OG0000485	0	3	2	1	4	7	3	3	3	6	3	6	2	4	2	3	4	3
OG0000486	3	2	2	1	7	10	3	2	2	7	3	4	2	3	2	1	2	2
OG0000487	2	3	3	6	2	4	3	1	3	4	3	6	4	3	3	3	2	3
OG0000488	3	2	1	1	6	9	3	3	1	6	2	10	1	3	1	2	2	2
OG0000489	1	1	2	2	3	4	5	3	0	4	5	5	6	5	2	5	3	2
OG0000491	2	1	3	0	4	5	2	3	1	4	4	11	3	4	2	3	4	2
OG0000492	1	2	3	3	11	5	3	2	2	4	2	4	3	3	2	3	2	3
OG0000493	1	2	4	2	1	6	2	2	3	3	2	3	12	3	2	2	6	2
OG0000494	1	3	5	3	4	5	2	2	4	6	1	3	2	4	6	2	1	4
OG0000495	0	8	5	0	2	1	6	1	8	1	1	2	1	2	6	4	1	9
OG0000498	0	2	4	1	10	6	6	1	1	5	0	5	4	5	4	1	1	2
OG0000500	2	2	2	1	6	7	2	2	2	4	2	10	3	3	2	3	2	2
OG0000501	2	1	2	2	15	4	2	3	3	5	2	4	2	2	2	2	2	2
OG0000502	4	1	3	3	6	4	1	3	1	3	7	1	3	5	1	3	5	3
OG0000503	4	2	5	1	2	6	2	3	2	4	3	6	2	2	2	1	7	3
OG0000504	1	9	3	2	9	2	1	2	2	0	2	11	2	4	2	3	1	1
OG0000505	1	2	2	1	3	12	2	2	2	6	1	10	2	4	2	2	1	2
OG0000506	2	3	3	2	3	5	3	2	3	5	3	8	2	3	3	2	3	2
OG0000507	1	3	4	2	3	6	2	1	4	4	1	10	2	5	3	2	1	3
OG0000508	0	2	2	2	3	11	2	1	2	6	3	9	2	5	2	2	1	2
OG0000511	2	2	2	3	4	8	2	2	2	7	2	9	2	3	2	1	1	2
OG0000512	2	1	1	17	2	7	1	2	1	3	1	6	6	2	0	1	2	1
OG0000513	1	2	3	1	5	8	2	2	2	3	3	4	3	5	4	2	3	3
OG0000514	2	3	2	3	4	5	5	3	2	4	2	7	2	3	3	3	1	2
OG0000515	1	0	0	5	10	12	3	1	0	9	5	4	0	0	1	2	3	0
OG0000516	1	5	3	2	1	1	2	1	6	2	6	4	3	7	2	2	2	6
OG0000517	1	4	3	1	4	5	5	1	3	4	2	9	1	3	4	1	2	3
OG0000518	2	2	0	1	5	11	1	0	2	7	3	7	2	5	1	2	4	1
OG0000519	1	3	1	5	4	7	1	3	3	5	6	5	4	3	1	1	1	2
OG0000520	1	4	1	1	2	16	6	1	2	5	4	7	1	2	1	1	1	0
OG0000521	1	1	1	1	6	6	3	4	1	5	2	6	2	7	2	4	3	1
OG0000522	0	1	2	0	4	3	5	2	1	3	8	7	3	3	6	3	3	2
OG0000523	0	2	1	0	2	13	2	2	2	9	1	7	1	1	2	2	7	2
OG0000524	0	9	2	0	3	2	4	3	3	2	3	7	4	6	2	0	3	3
OG0000525	0	4	3	0	2	7	1	1	1	4	3	7	5	2	5	2	2	7
OG0000526	0	1	2	3	5	7	4	2	1	3	3	11	2	4	3	3	1	1
OG0000527	0	1	1	4	7	0	5	0	1	0	7	10	3	11	3	2	0	1
OG0000528	0	1	2	0	5	8	4	2	2	7	4	8	1	4	1	3	3	1
OG0000530	3	3	3	0	6	4	4	3	2	2	2	5	4	4	4	1	3	2
OG0000531	1	2	1	4	6	6	2	0	3	4	2	5	5	4	3	5	1	1
OG0000532	1	1	5	1	5	15	0	1	3	1	4	3	6	5	2	0	1	1
OG0000533	1	4	2	1	4	7	2	2	4	6	3	2	2	5	3	2	3	2
OG0000534	2	2	3	4	2	7	2	2	2	6	1	5	4	3	2	3	2	3
OG0000535	1	1	3	3	6	8	3	2	1	6	2	5	2	3	1	2	4	2
OG0000536	0	2	5	3	6	7	0	1	1	5	1	5	1	5	2	4	5	2
OG0000537	0	2	3	0	7	7	2	2	2	5	1	9	0	3	3	3	4	2
OG0000538	0	1	1	2	2	2	2	1	1	2	28	4	3	1	1	2	1	1
OG0000539	0	0	1	1	6	1	5	1	0	1	3	4	4	8	1	2	16	1
OG0000540	1	3	4	0	7	4	3	2	2	1	4	5	3	5	2	2	3	3
OG0000541	4	2	1	2	3	8	2	2	2	4	2	6	2	3	3	3	3	2
OG0000542	3	2	1	3	5	6	3	2	2	4	3	4	2	4	2	2	3	3
OG0000543	2	2	2	3	4	6	2	1	2	5	2	6	6	3	2	2	2	2
OG0000544	3	3	5	2	2	7	2	1	3	5	2	4	1	2	4	1	1	6
OG0000545	1	2	3	1	6	7	3	1	2	4	2	8	2	4	2	3	1	2
OG0000546	7	2	3	1	2	3	4	2	1	2	1	1	2	14	1	1	3	4
OG0000547	3	2	3	2	3	6	1	2	2	5	3	3	2	5	3	4	3	2
OG0000548	1	2	2	2	7	5	2	2	2	4	4	5	3	4	2	2	3	2
OG0000549	2	2	4	2	4	5	2	2	2	4	2	5	2	5	3	2	3	3
OG0000550	1	1	1	1	1	1	0	0	1	38	2	1	1	1	1	1	1	1
OG0000551	3	3	2	2	3	5	2	3	2	4	2	4	3	4	3	3	3	3
OG0000552	0	12	3	0	1	0	8	0	15	0	2	1	2	0	2	0	0	8
OG0000553	2	1	1	2	4	1	2	3	1	1	16	4	3	4	1	3	3	1
OG0000554	3	1	1	2	7	2	2	0	0	1	4	3	0	8	0	12	2	5
OG0000555	2	1	2	1	4	9	2	3	2	5	2	4	2	2	3	3	1	5
OG0000556	1	2	2	4	9	5	3	1	2	4	4	3	2	3	2	2	1	3
OG0000557	2	2	2	3	4	6	2	2	2	5	2	6	3	2	4	2	2	2
OG0000558	3	2	2	3	4	4	2	2	2	4	3	3	2	4	3	4	3	3
OG0000559	1	3	3	1	3	13	3	1	1	7	2	4	1	2	2	1	1	4
OG0000560	2	3	2	2	5	6	2	1	2	4	2	8	3	3	2	3	1	2
OG0000561	1	1	1	1	25	1	2	1	1	0	12	1	0	1	1	2	2	0
OG0000562	1	1	1	1	4	8	5	2	1	6	3	8	1	3	1	3	2	2
OG0000563	2	1	3	24	2	0	2	0	2	0	2	5	2	2	2	1	1	2
OG0000564	1	6	2	1	14	3	2	2	3	2	1	3	1	3	2	4	0	3
OG0000565	2	1	2	2	1	16	4	2	1	6	1	4	2	1	3	2	2	1
OG0000566	2	2	4	2	5	4	1	2	1	5	4	4	1	5	3	3	2	3
OG0000567	1	2	2	0	6	0	3	3	1	0	4	5	3	13	1	2	2	5
OG0000568	1	1	4	1	11	4	3	1	1	4	3	5	2	2	3	2	3	2
OG0000569	1	2	2	2	5	9	3	2	2	4	2	3	3	4	2	2	3	2
OG0000570	0	11	9	3	0	3	6	0	5	2	3	0	0	0	1	3	0	7
OG0000571	0	2	1	2	6	11	1	1	1	6	3	8	1	1	1	7	0	1
OG0000572	0	2	1	1	9	5	3	1	1	3	2	13	1	5	1	2	1	2
OG0000573	0	1	1	0	4	10	3	0	2	8	3	5	2	8	1	3	0	2
OG0000577	1	2	2	1	7	6	2	2	2	4	2	4	2	7	2	2	2	2
OG0000578	3	2	2	3	2	7	4	2	2	4	2	2	3	3	3	2	4	2
OG0000579	2	3	2	2	5	5	2	1	2	5	4	3	3	4	2	2	3	2
OG0000580	3	4	3	1	4	5	2	1	6	4	2	5	2	3	3	1	1	2
OG0000581	1	2	4	13	4	0	2	2	3	0	1	4	1	5	2	2	2	4
OG0000582	1	1	2	1	4	9	2	2	3	6	8	3	1	2	2	2	1	2
OG0000583	6	1	2	4	1	13	1	1	1	3	1	4	2	2	1	3	5	1
OG0000584	3	3	1	3	2	4	3	3	3	4	2	3	3	3	3	3	3	3
OG0000585	2	3	3	10	3	2	1	2	3	2	1	3	5	4	1	3	2	2
OG0000586	1	1	1	1	2	3	6	0	2	1	1	2	2	24	1	1	2	1
OG0000587	3	2	6	1	7	1	5	2	2	1	2	2	7	2	3	2	2	2
OG0000588	2	3	2	3	3	7	3	2	2	4	2	4	2	4	2	3	2	2
OG0000589	2	2	4	5	5	4	1	3	2	3	5	0	2	4	2	4	2	2
OG0000590	2	2	2	1	3	5	3	2	2	6	3	7	2	4	2	1	2	3
OG0000591	2	3	3	1	9	5	2	1	2	3	1	5	2	3	2	4	2	2
OG0000592	1	2	3	3	8	7	1	1	3	4	2	6	1	3	1	3	1	2
OG0000593	2	3	2	2	5	6	1	3	3	5	2	5	2	2	3	2	3	1
OG0000594	1	1	1	0	5	1	1	5	1	1	2	11	3	6	4	5	3	1
OG0000596	0	1	4	1	7	12	0	3	0	3	1	7	3	7	1	0	2	0
OG0000597	0	1	1	0	2	12	9	1	1	9	1	3	0	3	1	2	5	1
OG0000598	0	1	1	0	3	1	4	0	0	2	1	2	1	32	1	2	0	1
OG0000599	0	1	1	5	5	5	3	4	1	3	4	1	3	13	1	0	1	1
OG0000602	1	2	2	1	6	1	3	2	2	1	4	4	2	5	3	4	6	2
OG0000603	2	2	2	3	3	7	2	1	2	6	1	7	2	2	2	3	2	2
OG0000604	1	1	2	4	1	4	2	3	3	7	6	1	5	1	2	2	0	6
OG0000605	1	2	2	0	8	1	1	2	4	4	2	1	1	9	1	6	1	5
OG0000606	4	3	2	2	3	2	6	0	3	4	3	2	1	2	2	4	6	2
OG0000607	2	4	2	2	4	3	3	2	3	3	2	3	2	4	3	4	2	3
OG0000608	3	2	1	1	2	4	2	2	2	3	2	8	6	4	2	3	2	2
OG0000609	1	2	2	2	8	5	2	1	2	5	2	6	1	6	2	1	1	2
OG0000610	1	5	4	2	6	2	1	2	4	4	3	2	1	3	4	2	1	4
OG0000611	1	1	1	1	8	1	0	1	1	1	1	1	1	1	1	1	28	1
OG0000612	1	3	3	4	2	7	2	3	4	4	2	2	3	2	3	1	3	2
OG0000613	1	4	3	2	5	5	2	2	2	2	2	4	1	5	4	2	2	3
OG0000614	1	1	1	5	3	12	1	1	1	8	1	7	1	3	1	2	1	1
OG0000615	2	2	3	1	7	4	2	1	2	4	3	6	3	2	2	2	2	3
OG0000616	1	1	4	2	8	8	1	1	1	4	2	7	2	3	1	3	1	1
OG0000617	1	2	1	1	14	7	0	1	0	4	2	4	1	5	3	1	2	2
OG0000621	1	2	3	1	3	7	3	1	2	4	4	5	2	5	2	2	1	2
OG0000622	2	4	3	0	5	6	2	2	2	4	2	4	1	3	3	2	2	3
OG0000623	2	2	3	1	3	6	0	2	2	6	2	6	2	4	2	2	3	2
OG0000624	3	2	1	6	9	0	2	1	5	0	1	2	3	3	3	1	5	3
OG0000625	1	1	1	5	2	1	12	3	1	2	2	1	1	0	1	14	1	1
OG0000626	2	2	3	2	5	3	2	1	5	3	1	8	3	1	2	1	3	3
OG0000627	1	2	2	1	4	6	2	2	2	5	1	5	1	3	2	1	8	2
OG0000628	1	2	2	2	4	6	4	2	2	4	2	4	2	3	2	2	2	4
OG0000629	1	1	1	11	0	9	1	1	1	0	0	3	0	7	2	1	10	1
OG0000630	2	3	4	1	4	5	2	2	2	5	2	5	1	2	2	2	4	2
OG0000631	2	4	6	3	1	2	3	2	4	2	2	3	4	4	2	1	1	4
OG0000632	2	3	1	3	8	3	2	4	3	2	3	3	2	3	2	2	2	2
OG0000633	1	2	2	1	5	6	2	2	2	3	4	7	1	2	2	2	4	2
OG0000634	1	2	2	2	4	9	3	1	1	6	2	6	1	2	2	2	2	2
OG0000635	1	2	1	1	3	4	1	2	2	2	2	9	2	3	3	2	8	2
OG0000636	1	2	1	2	3	8	1	1	1	5	2	6	1	5	2	2	5	2
OG0000638	0	10	3	0	8	0	1	0	3	0	0	7	0	13	1	1	0	3
OG0000639	0	2	3	1	4	7	3	0	0	2	3	13	2	3	0	0	3	4
OG0000640	0	1	0	0	2	0	1	0	1	0	1	0	1	40	1	1	0	1
OG0000641	0	1	1	0	3	14	1	2	2	10	2	4	1	2	1	3	2	1
OG0000644	4	2	3	2	2	7	2	1	2	4	2	7	2	1	2	2	2	2
OG0000645	3	2	1	3	4	2	1	8	2	1	3	5	5	3	1	1	3	1
OG0000646	3	1	2	4	5	4	4	2	2	4	3	3	3	3	2	1	1	2
OG0000647	1	2	2	2	5	3	2	2	2	4	2	6	2	5	3	2	2	2
OG0000648	1	1	2	1	5	3	0	1	2	2	4	7	3	7	3	2	3	2
OG0000649	2	3	3	4	2	3	2	1	3	2	1	1	3	7	4	1	3	4
OG0000650	1	1	1	1	5	10	1	1	1	8	1	5	1	2	1	1	7	1
OG0000651	1	3	4	1	3	5	4	1	3	5	2	4	1	2	2	2	2	4
OG0000652	2	2	2	5	4	6	0	3	1	3	2	5	2	3	2	3	2	2
OG0000653	1	2	3	2	3	4	3	3	2	0	4	8	2	5	2	1	2	2
OG0000654	1	1	1	3	7	4	9	1	1	3	3	5	2	1	2	3	1	1
OG0000655	2	2	2	2	7	1	2	3	1	0	1	9	3	5	3	1	3	2
OG0000657	1	2	1	0	6	5	2	2	3	5	2	6	1	4	2	2	2	3
OG0000658	0	2	2	2	6	1	2	2	2	1	4	4	4	10	1	2	2	2
OG0000659	0	2	2	1	9	2	5	1	2	2	3	3	2	3	4	4	1	3
OG0000660	0	3	4	1	4	10	2	1	2	6	3	5	0	1	2	2	1	2
OG0000661	0	1	3	1	13	6	4	0	1	2	0	4	2	6	2	2	1	1
OG0000662	0	1	2	0	3	2	1	1	3	2	0	2	0	25	3	1	0	3
OG0000664	0	0	0	2	6	4	1	0	0	1	4	2	1	22	0	4	2	0
OG0000666	1	1	2	1	4	5	1	1	1	3	4	12	2	1	3	1	4	1
OG0000667	2	2	1	3	7	3	2	2	2	1	1	1	3	10	1	1	4	2
OG0000668	2	3	3	0	5	4	2	2	3	3	1	4	1	2	2	3	5	3
OG0000669	2	2	2	2	6	3	2	3	3	2	4	2	2	2	2	5	2	2
OG0000670	3	3	3	1	4	1	1	0	3	1	3	8	1	5	2	3	3	3
OG0000671	1	3	1	4	3	4	4	2	2	3	4	2	5	1	1	2	3	3
OG0000672	1	2	3	3	3	1	5	1	2	1	4	6	1	4	3	3	3	2
OG0000673	2	4	2	2	3	4	3	5	2	3	2	4	2	2	2	2	2	2
OG0000674	1	2	2	3	3	3	2	3	2	5	3	3	1	2	2	4	4	3
OG0000675	0	2	2	0	5	0	4	4	2	0	3	10	0	11	1	0	2	2
OG0000676	0	2	1	6	3	9	9	0	1	0	1	0	0	0	0	4	11	1
OG0000677	0	4	3	1	2	3	4	2	3	5	2	5	2	2	0	2	1	7
OG0000678	0	1	4	1	9	0	3	2	1	0	3	12	1	4	3	1	2	1
OG0000679	0	2	1	7	4	11	3	1	2	3	1	3	2	4	1	1	1	1
OG0000684	2	1	3	1	6	6	1	2	2	3	2	9	1	2	2	2	1	1
OG0000685	2	2	2	1	3	5	3	2	2	5	1	4	1	3	3	2	4	2
OG0000686	3	2	2	5	2	3	3	1	2	3	1	4	3	3	2	2	4	2
OG0000687	2	1	1	0	2	2	1	1	1	28	1	2	0	1	1	1	1	1
OG0000688	1	2	1	2	6	3	3	2	2	2	2	5	1	7	2	2	2	2
OG0000689	1	2	1	1	2	7	2	2	1	7	2	9	1	2	2	1	2	2
OG0000690	2	2	2	0	3	3	2	3	2	3	2	7	2	4	1	3	4	2
OG0000691	1	4	3	1	2	3	2	2	3	3	2	6	2	4	2	3	2	2
OG0000692	2	3	3	2	4	3	1	2	3	3	3	3	2	3	3	2	2	3
OG0000693	1	2	2	2	4	2	1	2	2	2	2	6	2	4	2	3	6	2
OG0000694	3	1	2	1	5	1	1	1	1	1	1	1	1	16	1	0	5	5
OG0000695	1	4	2	2	3	3	3	2	3	3	1	4	3	3	3	3	1	3
OG0000696	1	1	1	3	2	5	2	1	1	3	4	3	3	2	1	11	1	2
OG0000697	2	2	3	2	1	5	2	2	1	5	2	6	3	3	2	2	2	2
OG0000698	1	2	2	2	3	2	5	2	3	7	2	5	1	3	2	2	1	2
OG0000699	0	3	4	0	2	4	0	0	1	4	19	1	0	2	3	2	0	2
OG0000701	1	2	1	2	2	5	2	2	2	5	2	7	1	4	1	2	3	2
OG0000702	2	4	3	1	3	3	3	2	4	3	1	3	2	2	3	2	2	3
OG0000703	4	1	3	2	4	2	3	3	1	0	3	2	4	2	2	6	3	1
OG0000704	2	3	2	1	4	5	2	1	2	4	1	5	2	3	2	1	3	3
OG0000705	2	2	0	5	6	1	1	3	5	1	6	2	5	3	0	3	1	0
OG0000706	7	1	1	2	5	3	2	2	1	2	2	2	3	6	2	1	2	2
OG0000707	2	2	2	2	3	2	7	4	2	2	2	2	3	2	2	3	2	2
OG0000708	1	1	2	0	7	0	10	1	1	0	2	6	4	4	1	3	2	1
OG0000709	1	1	1	1	7	6	3	1	1	2	4	6	4	1	2	2	1	2
OG0000710	1	1	2	1	4	4	1	2	1	2	6	9	2	2	1	5	1	1
OG0000711	2	1	3	1	6	6	2	1	1	3	1	6	3	3	1	1	4	1
OG0000712	1	2	2	5	2	6	2	1	3	3	8	2	1	2	1	2	1	2
OG0000713	2	2	2	1	2	6	2	2	2	5	1	7	2	2	2	1	3	2
OG0000714	1	1	1	1	2	1	1	1	1	1	1	1	28	1	1	1	1	1
OG0000715	1	1	2	12	3	5	1	1	1	3	3	4	1	2	1	3	1	1
OG0000716	1	3	4	1	2	5	4	1	3	4	1	3	1	3	3	1	2	4
OG0000717	2	2	2	2	3	6	2	1	2	6	2	4	2	2	1	1	4	2
OG0000718	3	2	2	2	2	3	2	7	2	3	2	2	2	2	2	1	4	3
OG0000719	1	2	3	2	2	7	2	1	3	7	1	4	1	2	2	1	3	2
OG0000720	1	4	3	2	6	2	4	2	2	2	3	3	1	3	4	1	1	2
OG0000721	2	2	3	2	4	2	6	2	2	2	2	4	2	3	2	2	2	2
OG0000722	1	2	2	4	2	4	1	1	2	4	2	3	2	5	3	1	4	3
OG0000723	2	1	1	1	5	6	2	1	1	5	1	7	2	2	2	3	2	2
OG0000724	1	1	0	19	4	2	1	1	1	1	2	5	1	2	1	1	2	1
OG0000725	1	2	2	1	3	5	3	1	2	3	2	3	6	3	2	2	2	3
OG0000726	1	2	2	0	6	4	1	1	2	4	8	4	1	4	1	2	1	2
OG0000728	0	1	1	0	1	29	1	1	1	4	1	1	0	1	1	1	0	2
OG0000729	0	2	2	6	5	6	0	1	2	6	2	3	2	2	2	2	1	2
OG0000730	0	8	2	0	4	3	1	0	9	1	0	2	0	1	1	0	0	14
OG0000731	0	2	1	1	4	5	1	0	2	0	6	15	1	4	1	2	0	1
OG0000732	0	1	1	2	2	8	3	1	1	3	4	5	0	7	0	2	5	1
OG0000733	0	1	1	2	3	12	4	1	1	6	2	4	1	1	2	1	1	3
OG0000734	0	0	0	1	8	5	0	1	0	4	7	8	2	8	0	1	1	0
OG0000735	0	0	0	3	11	1	2	0	0	3	14	1	1	2	0	8	0	0
OG0000737	2	2	2	2	4	7	2	2	2	5	2	3	1	2	2	0	3	2
OG0000738	2	1	1	7	4	4	2	1	1	2	2	7	3	2	1	2	2	1
OG0000739	4	2	3	1	2	3	3	2	2	3	2	6	2	2	2	4	1	1
OG0000740	4	1	2	1	4	2	1	1	1	2	7	4	1	9	0	4	0	1
OG0000741	3	2	2	3	4	5	2	1	3	3	3	2	2	2	2	2	2	2
OG0000742	1	1	1	2	3	12	1	1	1	7	2	5	1	2	1	2	1	1
OG0000743	2	2	1	1	3	3	2	2	2	3	1	5	3	5	2	2	4	2
OG0000744	1	1	1	2	3	4	3	5	1	2	2	3	8	2	1	1	4	1
OG0000745	2	1	2	3	3	4	1	1	3	5	1	3	2	4	2	3	3	2
OG0000746	3	2	3	1	2	2	2	3	2	2	3	3	4	3	3	2	2	3
OG0000747	1	4	2	1	2	6	2	2	2	4	1	5	2	2	4	1	2	2
OG0000748	1	1	3	1	4	6	2	2	1	4	2	8	0	4	1	1	2	2
OG0000749	1	1	1	1	4	4	15	1	1	3	1	2	2	4	1	1	1	1
OG0000750	1	1	2	3	5	7	1	1	1	6	3	5	1	1	1	4	1	1
OG0000751	2	2	3	2	6	2	3	2	2	2	2	3	2	4	2	2	2	2
OG0000752	1	2	0	1	3	3	1	3	4	3	2	2	6	11	0	1	1	1
OG0000753	2	1	1	3	5	5	1	1	1	3	2	5	2	3	2	1	5	2
OG0000754	1	1	2	1	3	6	3	2	1	4	2	6	2	3	2	1	3	2
OG0000755	1	2	4	2	3	4	3	1	2	5	1	3	1	3	3	5	0	2
OG0000756	2	1	2	1	5	4	3	2	2	4	2	5	2	3	2	1	2	2
OG0000757	1	0	0	0	7	1	0	1	0	30	1	1	0	0	1	1	1	0
OG0000758	1	3	2	1	7	6	1	1	3	3	1	5	1	2	4	1	1	2
OG0000759	1	1	2	2	2	4	6	2	2	2	1	3	1	3	6	1	1	5
OG0000760	0	2	2	3	3	3	2	1	3	2	2	7	2	6	2	2	1	2
OG0000761	0	1	1	1	3	0	1	2	1	0	3	16	4	7	1	1	2	1
OG0000762	0	1	1	1	12	2	4	1	1	3	4	4	2	3	1	2	2	1
OG0000763	0	2	4	5	4	3	2	2	3	2	1	3	6	1	2	2	1	2
OG0000764	0	1	1	1	5	8	4	1	1	4	1	6	1	3	2	4	1	1
OG0000766	2	1	6	4	2	3	3	4	6	3	1	1	2	1	1	1	1	2
OG0000767	2	1	0	0	6	0	2	4	1	0	4	5	4	10	2	1	1	1
OG0000768	3	2	2	1	3	3	2	1	2	3	2	8	1	4	2	1	2	2
OG0000769	3	2	2	1	2	5	2	2	2	4	1	9	1	2	1	1	2	2
OG0000770	1	2	3	1	3	7	3	1	2	5	2	2	2	2	2	3	1	2
OG0000771	1	1	2	2	8	1	3	1	2	0	4	4	2	5	2	3	1	2
OG0000772	1	5	5	1	2	0	3	1	5	0	1	4	2	2	2	3	1	6
OG0000773	2	2	2	1	3	2	3	5	2	2	2	3	0	6	3	1	2	3
OG0000774	2	2	3	2	4	2	4	2	2	2	3	3	2	4	1	2	2	2
OG0000775	2	2	2	5	5	3	3	0	2	6	0	5	0	3	2	2	0	2
OG0000776	3	1	1	4	3	8	1	1	1	3	2	7	2	2	1	1	2	1
OG0000777	2	1	1	8	3	5	3	2	1	3	1	3	2	2	1	2	3	1
OG0000778	3	3	0	0	5	2	3	2	3	1	3	2	0	5	3	3	3	3
OG0000779	2	2	2	2	2	2	2	4	2	2	3	3	2	5	2	2	3	2
OG0000780	1	1	1	3	6	6	1	1	4	4	1	4	2	3	2	1	1	2
OG0000781	1	1	2	1	3	3	2	5	1	3	1	8	3	3	2	2	2	1
OG0000782	1	3	1	1	3	9	2	1	1	13	1	2	1	1	1	1	1	1
OG0000783	1	2	2	2	4	3	6	3	2	3	2	3	2	1	2	2	2	2
OG0000784	1	1	0	0	5	4	2	1	2	2	1	8	2	5	2	3	3	2
OG0000785	2	1	3	1	2	5	2	1	1	3	3	8	2	2	2	2	2	2
OG0000786	2	1	1	1	7	3	1	1	1	2	7	4	2	4	1	3	2	1
OG0000787	0	1	1	0	3	8	4	0	2	6	3	5	0	6	0	2	0	3
OG0000788	0	2	6	1	2	4	2	2	2	3	1	11	2	1	2	1	1	1
OG0000789	0	3	5	1	3	3	1	0	5	6	0	3	0	4	4	3	0	3
OG0000790	0	1	1	1	3	9	3	2	1	5	1	6	0	2	1	2	4	2
OG0000791	0	2	2	1	3	5	2	2	2	3	1	4	2	7	2	3	1	2
OG0000792	0	3	1	2	3	4	2	2	2	4	6	2	2	1	1	2	3	4
OG0000796	2	1	4	1	3	2	3	3	0	2	4	3	3	2	1	3	3	3
OG0000797	1	1	1	1	2	5	2	1	1	3	2	7	3	3	3	2	3	2
OG0000798	1	2	2	1	7	4	0	2	2	2	1	7	2	4	2	1	1	2
OG0000799	2	2	2	2	3	3	2	3	2	3	2	3	2	3	2	3	2	2
OG0000800	2	2	2	2	7	2	2	3	2	2	1	2	2	3	2	3	2	2
OG0000801	2	2	2	2	3	2	6	1	3	2	2	2	1	2	3	4	2	2
OG0000802	2	2	2	3	3	2	2	5	2	2	2	2	2	2	2	3	3	2
OG0000803	2	3	2	1	3	4	2	1	1	4	2	3	2	6	3	0	1	3
OG0000804	1	1	1	1	3	5	1	2	1	5	2	8	3	3	1	2	2	1
OG0000805	2	2	2	2	3	2	2	3	2	2	3	2	2	4	2	2	4	2
OG0000807	1	1	1	4	2	1	2	4	1	1	3	3	2	2	1	1	11	2
OG0000808	1	0	1	0	8	3	0	0	0	0	5	4	2	16	0	2	1	0
OG0000809	1	1	3	1	7	3	1	1	1	6	1	3	1	7	2	1	1	2
OG0000810	1	0	0	0	2	8	1	1	0	5	1	3	1	16	1	1	1	1
OG0000811	1	2	2	1	3	6	2	1	2	4	1	5	1	4	2	3	1	2
OG0000812	1	1	2	2	3	6	1	0	3	5	1	4	1	4	2	4	2	1
OG0000814	0	2	3	2	3	0	7	1	3	0	3	9	1	3	2	2	0	2
OG0000816	0	1	2	4	4	2	2	1	1	1	3	4	3	4	2	6	1	2
OG0000817	0	3	3	0	4	0	4	0	2	0	2	8	2	5	3	2	2	3
OG0000818	0	1	1	1	5	1	10	0	1	1	0	1	5	7	0	6	0	3
OG0000822	1	2	1	4	1	2	12	1	1	2	3	1	4	4	1	1	0	1
OG0000823	1	1	2	2	6	2	4	1	2	1	1	3	1	7	2	3	1	2
OG0000824	3	1	1	1	5	6	1	2	1	4	1	6	1	2	2	1	3	1
OG0000825	4	1	2	1	2	6	5	1	1	4	2	2	2	2	1	1	4	1
OG0000826	3	1	2	1	4	3	1	2	1	2	4	5	1	4	2	1	2	3
OG0000827	1	2	2	1	6	3	2	0	1	3	3	7	1	2	3	2	1	2
OG0000828	1	3	2	1	1	4	4	2	3	3	2	5	2	1	2	2	2	2
OG0000829	1	1	1	2	3	6	1	1	1	3	2	6	4	2	1	4	1	2
OG0000830	1	1	2	1	7	5	2	1	2	4	1	7	1	3	1	1	1	1
OG0000831	2	1	1	1	2	8	2	1	1	4	1	10	1	2	1	2	1	1
OG0000832	1	1	0	2	8	6	0	4	1	3	1	3	3	2	2	1	1	3
OG0000833	1	2	3	3	3	3	3	2	3	2	1	6	1	1	2	0	1	5
OG0000834	1	2	2	1	4	7	2	2	1	4	2	5	1	3	1	2	1	1
OG0000835	1	1	1	1	5	5	1	1	1	5	2	4	1	2	1	6	3	1
OG0000836	1	2	1	1	13	3	1	1	3	5	1	3	1	2	1	1	1	1
OG0000837	2	2	2	2	3	2	2	4	2	2	3	2	2	2	2	3	3	2
OG0000838	1	3	3	2	1	3	3	2	4	4	2	2	2	2	2	3	1	2
OG0000839	1	1	5	2	3	3	1	1	1	3	1	2	2	2	1	5	5	3
OG0000840	1	2	3	2	2	7	3	1	1	4	1	5	2	2	2	1	1	2
OG0000841	1	5	3	4	2	2	1	0	8	2	1	2	2	1	1	1	3	3
OG0000842	1	2	2	5	2	3	1	3	2	1	1	3	7	1	3	2	1	2
OG0000843	1	2	2	1	2	5	2	2	4	3	2	3	2	3	2	2	2	2
OG0000844	0	4	3	0	1	1	0	1	2	1	5	2	2	3	3	2	4	8
OG0000845	0	1	2	3	5	2	1	1	1	2	11	1	4	2	1	1	4	0
OG0000846	0	1	2	1	5	1	0	0	8	0	9	7	1	2	1	3	0	1
OG0000847	0	1	0	0	6	0	6	4	2	0	3	7	2	4	1	2	1	3
OG0000848	0	1	1	1	6	1	1	0	1	18	1	4	1	3	1	1	0	1
OG0000849	0	0	2	12	3	3	1	0	0	3	2	6	3	2	1	3	0	1
OG0000855	2	2	2	2	2	5	1	2	2	4	2	4	1	2	2	2	2	2
OG0000856	1	2	2	1	2	3	1	1	2	3	1	2	2	2	2	11	1	2
OG0000857	4	2	2	0	8	4	1	0	3	2	3	2	1	1	1	4	0	3
OG0000858	2	2	2	2	4	1	1	4	3	1	2	4	3	2	2	3	1	2
OG0000859	1	2	2	2	2	3	2	3	3	4	3	3	2	2	2	2	1	2
OG0000860	4	1	1	3	3	3	2	1	2	5	1	4	5	2	1	1	1	1
OG0000861	1	0	0	2	4	7	2	1	0	6	1	9	2	2	1	2	1	0
OG0000862	1	2	2	3	1	2	1	1	2	1	2	2	2	8	2	1	3	5
OG0000863	2	2	2	0	4	0	2	1	1	0	4	8	1	4	2	0	2	6
OG0000864	2	1	1	1	2	1	2	3	1	2	4	7	1	5	1	1	4	2
OG0000865	1	2	2	2	3	3	2	4	2	3	2	3	2	2	2	2	2	2
OG0000866	1	2	2	2	2	4	2	1	1	3	2	6	2	2	1	3	3	2
OG0000867	1	1	1	16	2	2	1	1	1	1	1	0	1	1	1	1	8	1
OG0000868	1	3	2	0	5	0	1	1	3	0	2	0	4	5	1	5	5	3
OG0000869	1	1	2	1	5	0	1	1	1	0	3	7	2	5	3	5	1	2
OG0000870	1	0	0	0	5	6	2	1	0	1	7	5	1	4	1	3	4	0
OG0000871	1	2	1	1	3	8	1	2	1	7	1	2	5	1	1	1	2	1
OG0000872	1	2	2	1	3	5	5	1	1	3	1	6	1	4	1	1	2	1
OG0000873	1	1	1	2	3	5	4	1	1	4	1	5	0	3	1	1	6	1
OG0000874	2	2	2	1	3	2	2	2	1	1	2	5	2	3	5	2	2	2
OG0000875	1	2	2	2	3	5	3	2	1	3	3	3	1	2	2	2	2	2
OG0000876	1	1	2	1	9	5	2	1	1	3	5	3	1	1	1	2	1	1
OG0000877	0	1	2	4	4	5	1	2	1	3	2	7	1	3	2	1	1	1
OG0000878	0	8	0	2	7	2	7	3	2	2	1	2	0	2	1	1	0	1
OG0000879	0	1	1	6	2	6	3	1	1	2	2	3	1	5	3	2	1	1
OG0000881	0	2	3	0	3	7	7	1	2	3	1	4	1	0	1	1	3	2
OG0000882	0	1	2	1	8	6	1	1	1	3	1	4	1	4	1	2	3	1
OG0000883	0	1	3	2	1	2	1	2	1	3	2	2	12	1	1	2	4	1
OG0000884	0	1	2	3	2	10	5	0	1	8	1	3	0	2	1	0	0	2
OG0000885	0	1	2	19	2	2	1	0	1	2	1	5	1	1	1	1	0	1
OG0000890	1	1	1	1	4	5	2	1	1	7	1	3	1	7	1	1	1	1
OG0000891	1	1	3	0	5	4	6	1	1	2	2	3	2	3	1	1	3	1
OG0000892	2	2	3	1	7	4	1	1	2	3	1	3	1	1	1	1	4	2
OG0000893	1	2	2	2	5	1	2	1	2	3	2	2	2	5	2	2	2	2
OG0000894	2	2	2	2	4	2	2	2	2	2	2	2	2	2	2	2	4	2
OG0000895	1	1	1	4	5	6	4	2	1	4	1	2	1	2	1	1	1	2
OG0000896	2	3	1	7	2	2	1	1	0	3	2	3	3	2	1	1	4	2
OG0000897	1	0	1	11	6	1	0	6	1	1	4	1	2	1	1	1	1	1
OG0000898	2	1	1	2	2	5	1	3	1	4	1	2	3	2	1	1	3	5
OG0000899	2	1	1	1	7	6	1	1	1	3	1	7	1	2	1	2	1	1
OG0000900	1	1	1	1	4	6	1	1	1	4	2	5	2	2	2	0	4	2
OG0000901	1	1	1	3	8	2	2	0	1	1	1	4	3	4	3	2	1	2
OG0000902	1	2	4	1	4	1	1	1	2	0	1	11	1	3	4	1	1	1
OG0000903	1	1	2	3	3	1	2	5	1	2	1	2	0	1	2	1	11	1
OG0000904	1	1	1	2	4	3	2	0	1	4	3	3	0	9	1	1	1	3
OG0000905	1	2	1	1	10	0	2	0	2	0	3	2	3	4	2	1	4	2
OG0000906	1	2	1	3	3	3	2	0	2	3	2	3	4	2	1	5	1	2
OG0000907	1	3	5	0	3	3	3	1	2	1	2	5	1	3	1	3	1	2
OG0000908	1	2	2	2	2	4	2	2	2	3	1	5	1	3	2	2	2	2
OG0000909	1	1	2	1	3	5	1	1	1	4	2	5	1	5	2	1	3	1
OG0000910	1	3	2	2	3	3	2	2	2	2	2	4	2	3	2	2	1	2
OG0000911	1	2	3	1	4	4	2	1	2	3	2	3	2	3	1	2	2	2
OG0000912	1	1	1	3	3	1	1	2	1	1	3	2	5	6	2	2	4	1
OG0000913	0	4	5	1	1	3	2	2	0	3	7	2	0	3	0	3	0	4
OG0000914	0	3	1	4	3	4	2	2	2	2	6	3	1	2	1	2	0	2
OG0000915	0	6	3	1	1	0	4	1	4	0	5	1	1	2	5	0	1	5
OG0000916	0	2	4	1	3	7	1	1	2	4	2	3	1	3	1	1	2	2
OG0000917	0	3	2	0	6	0	2	1	3	0	2	5	2	2	3	2	4	3
OG0000918	0	3	2	0	2	8	2	1	2	4	2	5	1	2	2	1	1	2
OG0000919	0	2	3	2	4	7	2	2	1	3	3	2	1	1	1	3	1	2
OG0000920	0	1	1	1	4	3	2	2	1	2	7	4	4	1	1	1	2	3
OG0000921	0	3	6	2	1	3	1	2	3	1	0	3	2	3	1	3	1	5
OG0000922	0	1	2	1	0	0	1	0	0	1	4	1	0	26	1	0	1	1
OG0000928	2	2	2	0	4	3	3	1	4	2	1	3	2	2	2	2	2	2
OG0000929	1	1	2	2	3	2	2	1	2	2	4	2	2	2	3	2	4	2
OG0000930	2	3	1	0	2	6	1	1	1	3	1	10	1	2	1	1	2	1
OG0000931	1	2	1	0	10	1	0	2	1	0	4	3	2	5	0	3	3	1
OG0000932	3	2	2	1	3	2	2	2	3	2	2	2	2	2	1	3	3	2
OG0000933	1	1	1	2	5	6	1	2	1	3	1	6	1	4	1	1	1	1
OG0000934	1	3	2	1	2	2	1	2	4	1	1	6	2	2	2	1	3	3
OG0000935	1	2	4	1	2	3	2	1	3	3	2	3	2	1	3	2	1	3
OG0000936	1	1	1	1	3	7	4	2	2	3	2	3	1	2	2	1	2	1
OG0000937	1	1	1	3	2	7	2	0	1	2	2	3	2	3	2	1	5	1
OG0000938	3	1	2	2	4	5	1	1	2	2	1	6	2	2	1	1	2	1
OG0000939	1	1	1	4	9	3	1	2	1	2	1	5	2	1	1	1	2	1
OG0000940	2	0	1	2	2	6	2	0	1	3	2	5	3	4	1	1	1	3
OG0000941	1	3	2	1	5	4	1	1	1	2	3	6	1	2	2	2	1	1
OG0000942	1	0	0	1	5	5	2	1	0	1	3	3	0	12	0	3	2	0
OG0000943	2	2	2	2	1	2	2	1	1	2	2	3	3	3	3	4	2	2
OG0000944	1	2	2	6	2	3	5	1	2	3	1	2	1	1	2	2	1	2
OG0000945	2	2	2	2	2	3	2	2	2	2	2	2	2	2	2	3	3	2
OG0000946	2	1	1	1	3	4	3	1	1	2	1	9	2	2	1	3	1	1
OG0000947	1	1	2	2	7	5	1	1	1	3	0	5	2	2	2	1	2	1
OG0000948	1	1	1	2	3	8	2	1	1	7	1	2	2	3	1	1	1	1
OG0000949	1	1	3	1	8	2	2	1	1	2	1	5	0	5	1	2	1	2
OG0000950	1	1	0	1	2	3	1	1	1	13	1	5	1	1	2	1	2	2
OG0000951	2	2	2	1	2	2	3	3	2	2	2	2	3	3	2	2	2	2
OG0000952	1	1	1	1	2	5	1	1	1	4	4	5	2	3	2	1	3	1
OG0000953	1	1	1	1	6	7	1	1	1	4	1	6	1	4	1	1	1	0
OG0000954	2	2	2	2	2	2	3	2	2	2	2	2	3	3	2	2	2	2
OG0000955	2	2	2	2	4	2	2	2	2	2	3	3	2	2	2	2	1	2
OG0000956	2	2	2	0	4	0	2	3	2	0	2	6	3	4	2	1	2	2
OG0000957	1	2	1	1	4	2	2	1	1	2	5	3	2	4	2	1	1	4
OG0000958	1	1	1	1	3	5	2	1	1	3	1	7	1	3	2	4	1	1
OG0000959	1	1	1	1	5	1	1	2	1	1	3	7	1	5	1	4	2	1
OG0000960	1	1	1	1	8	2	1	1	1	1	1	7	2	6	2	1	1	1
OG0000961	0	1	1	0	3	11	4	0	1	7	0	3	0	4	1	2	0	1
OG0000962	0	3	3	0	1	9	6	1	2	2	1	3	0	4	1	0	2	1
OG0000965	0	1	1	1	2	4	1	2	1	4	4	5	2	2	1	4	2	2
OG0000966	0	3	2	0	6	0	1	0	1	0	2	6	2	4	2	4	5	1
OG0000967	0	1	2	3	2	5	0	1	1	4	1	8	1	5	2	1	1	1
OG0000968	0	1	1	0	1	1	1	27	1	1	1	1	0	1	1	1	0	0
OG0000974	0	0	0	2	2	9	3	2	0	6	2	4	3	2	0	2	2	0
OG0000976	0	0	0	0	4	6	1	1	0	3	6	9	3	3	0	2	1	0
OG0000977	1	1	2	3	2	1	4	2	1	4	2	3	1	3	1	2	2	3
OG0000978	2	1	2	2	4	2	2	1	1	5	3	3	2	3	2	0	1	2
OG0000979	2	1	2	1	4	2	1	2	1	2	2	6	1	4	1	4	1	1
OG0000980	1	1	2	1	5	8	3	1	1	4	2	2	1	2	1	1	1	1
OG0000981	1	4	2	2	1	3	2	1	2	2	2	2	3	3	2	2	2	2
OG0000982	2	2	2	0	2	2	2	2	3	2	2	5	2	3	2	1	2	2
OG0000983	2	2	2	1	2	3	2	2	1	4	2	3	2	3	2	1	2	2
OG0000984	1	1	1	1	9	2	4	1	1	1	3	5	1	4	1	1	0	1
OG0000985	1	1	0	0	2	12	1	1	1	6	2	4	1	1	1	2	1	1
OG0000986	2	2	3	0	0	2	4	0	2	1	2	1	3	3	2	6	3	2
OG0000987	1	0	0	0	3	1	3	6	0	0	5	5	0	3	0	4	6	1
OG0000988	1	2	2	1	2	2	2	2	1	2	3	4	2	4	2	2	2	2
OG0000989	1	2	1	2	3	2	2	2	2	2	3	2	2	4	2	1	3	2
OG0000990	1	1	2	1	6	3	3	1	2	2	3	6	1	1	1	1	2	1
OG0000991	1	2	2	1	4	2	2	1	2	3	2	3	2	2	4	2	1	2
OG0000992	1	1	2	1	6	4	1	1	1	3	2	5	2	3	2	1	1	1
OG0000993	2	2	2	2	2	3	1	1	2	3	1	4	2	3	1	1	4	2
OG0000995	1	2	2	1	5	2	11	1	1	2	1	2	1	1	2	1	1	1
OG0000996	1	2	2	1	1	5	2	1	2	4	2	4	2	2	2	2	1	2
OG0000997	1	1	1	1	3	5	1	1	1	5	2	7	1	2	1	3	1	1
OG0000999	2	1	2	1	3	7	2	1	1	4	2	3	2	1	1	2	2	1
OG0001000	2	1	2	2	4	2	1	4	2	2	2	2	2	2	2	2	2	2
OG0001001	2	1	2	1	4	2	3	2	2	2	3	2	1	1	2	2	3	3
OG0001002	1	1	0	0	1	2	15	1	0	3	1	2	2	1	1	2	3	2
OG0001003	3	2	1	0	3	0	2	8	1	0	1	3	2	2	2	0	7	1
OG0001004	2	1	2	1	7	3	3	1	1	3	3	4	0	3	1	1	1	1
OG0001005	1	2	3	1	1	5	1	0	1	2	1	8	3	4	1	1	1	2
OG0001006	1	2	2	2	4	5	2	1	2	2	2	1	1	3	2	2	2	2
OG0001007	1	2	2	1	12	0	0	2	2	0	2	3	1	2	1	1	5	1
OG0001008	1	1	1	1	4	4	1	1	1	4	1	8	1	3	2	2	1	1
OG0001009	1	1	1	2	1	8	3	1	1	5	3	3	1	1	1	1	1	3
OG0001010	1	3	2	2	2	2	3	1	4	2	4	6	1	1	2	1	1	0
OG0001011	2	1	5	2	0	3	1	4	3	2	1	1	4	1	2	1	3	2
OG0001012	1	1	2	1	6	3	4	1	1	2	1	7	1	3	1	1	1	1
OG0001014	1	3	2	1	1	4	2	2	2	2	2	3	2	3	2	2	2	2
OG0001015	1	1	1	3	4	0	3	3	1	0	1	3	1	8	1	1	5	1
OG0001016	1	2	2	1	2	5	1	1	2	7	1	3	1	2	2	2	2	1
OG0001017	1	5	2	2	2	2	2	1	2	2	2	2	2	4	2	1	2	2
OG0001018	2	1	2	0	4	0	1	1	1	0	2	14	1	2	1	1	4	1
OG0001019	2	2	2	0	1	5	1	4	1	3	2	5	1	1	2	1	4	1
OG0001020	0	9	4	9	2	1	1	1	5	1	1	1	1	0	1	0	0	1
OG0001021	0	1	1	1	6	6	1	1	1	3	2	7	1	2	2	1	1	1
OG0001023	0	6	4	2	3	0	1	0	11	1	2	1	0	2	2	1	0	2
OG0001024	0	6	1	0	1	1	1	0	1	1	19	2	1	1	1	1	0	1
OG0001025	0	1	1	3	2	2	3	0	1	10	1	3	2	3	0	4	1	1
OG0001026	0	1	1	0	1	2	1	0	1	2	0	2	1	2	1	6	0	17
OG0001028	0	1	1	0	5	1	4	1	1	3	3	6	1	3	1	2	3	2
OG0001029	0	1	8	1	3	1	2	0	2	1	2	2	1	1	1	11	0	1
OG0001030	0	1	2	10	2	2	6	1	1	1	1	5	0	1	1	1	2	1
OG0001031	0	1	7	6	1	1	3	0	4	2	1	1	3	1	1	3	2	1
OG0001032	0	1	1	1	4	5	4	1	1	4	2	6	1	3	1	1	1	1
OG0001036	4	1	2	1	2	5	1	1	1	2	1	5	2	3	2	1	1	2
OG0001037	1	3	2	0	5	1	0	2	8	1	3	1	0	1	3	2	1	3
OG0001038	2	2	2	2	2	2	3	2	1	2	2	2	3	2	2	2	2	2
OG0001039	1	1	0	4	2	6	1	1	1	6	3	4	2	1	0	2	2	0
OG0001040	2	2	2	1	3	2	2	2	2	2	3	2	1	3	2	2	2	2
OG0001041	1	2	1	2	2	4	2	2	3	3	2	2	2	2	2	1	2	2
OG0001042	1	1	1	2	3	4	1	2	3	3	2	3	4	2	1	1	2	1
OG0001043	1	2	1	0	4	0	1	2	2	0	1	4	7	3	2	4	1	2
OG0001044	1	1	1	1	2	5	1	1	1	3	2	5	2	3	1	4	1	2
OG0001045	1	0	2	1	3	7	1	1	2	4	1	5	1	3	1	1	1	2
OG0001046	1	2	2	1	4	2	2	1	2	2	2	2	1	3	1	3	4	2
OG0001047	1	1	1	1	3	6	1	2	1	6	2	5	1	2	1	1	1	1
OG0001048	1	8	2	1	1	2	4	0	4	2	0	2	0	1	2	1	4	2
OG0001049	2	1	2	2	13	3	1	1	1	2	0	1	1	2	1	2	1	1
OG0001050	1	1	2	4	3	4	1	3	6	2	1	1	2	1	0	1	3	1
OG0001051	1	1	1	1	5	5	1	1	1	3	2	6	1	4	1	1	1	1
OG0001052	1	0	0	0	10	11	0	1	0	4	3	1	1	3	0	1	1	0
OG0001053	2	3	2	1	5	1	1	1	2	1	1	1	2	3	2	3	4	2
OG0001054	1	2	2	2	2	4	2	2	2	3	2	4	1	2	2	1	1	2
OG0001055	2	2	1	1	2	3	2	2	3	2	3	3	0	3	2	0	4	2
OG0001056	1	2	2	1	4	4	1	1	2	3	2	3	3	2	1	3	1	1
OG0001057	1	2	2	1	3	2	3	2	2	2	1	3	2	3	2	2	2	2
OG0001058	1	1	1	2	5	4	1	1	2	8	1	2	1	2	1	1	1	2
OG0001059	2	1	1	2	2	3	9	1	0	2	4	1	1	4	1	1	1	1
OG0001060	1	2	3	0	4	0	1	2	3	0	2	5	2	5	3	2	1	1
OG0001061	1	4	2	2	2	1	3	2	2	1	1	1	2	4	1	2	5	1
OG0001062	1	2	0	0	5	5	1	0	1	4	2	9	1	1	2	1	1	1
OG0001063	2	1	1	3	2	6	1	2	1	4	1	4	1	2	1	1	3	1
OG0001064	1	1	1	2	2	7	2	1	1	6	1	4	0	2	2	2	1	1
OG0001065	2	2	1	2	2	3	2	2	3	3	1	2	1	3	3	1	2	2
OG0001066	2	1	1	1	0	10	1	0	2	0	1	10	1	2	2	3	0	0
OG0001067	1	1	2	2	3	3	2	1	1	2	1	9	1	3	2	1	1	1
OG0001068	1	1	1	3	2	3	1	4	3	2	3	2	1	2	1	1	5	1
OG0001069	2	2	2	2	2	3	2	1	2	4	1	3	2	2	2	1	2	2
OG0001070	1	2	2	1	4	1	2	1	1	1	4	6	2	2	2	2	1	2
OG0001071	1	0	0	0	3	2	0	5	0	2	4	4	0	6	0	6	4	0
OG0001072	1	1	1	3	1	1	1	3	1	15	1	1	1	1	1	1	2	1
OG0001073	3	1	1	1	2	6	1	1	1	5	1	5	1	2	1	1	3	1
OG0001074	1	1	1	2	3	3	1	2	1	4	2	6	2	2	1	1	3	1
OG0001075	1	0	3	1	3	1	2	3	0	1	1	5	2	8	0	2	3	1
OG0001076	1	1	0	1	6	4	6	0	1	1	0	7	0	5	0	1	2	1
OG0001077	2	1	13	0	6	1	0	1	1	1	1	1	0	4	1	1	2	1
OG0001078	2	1	0	1	3	6	2	1	1	4	2	3	1	2	2	3	2	1
OG0001079	1	2	2	2	2	3	2	1	2	2	2	5	1	2	2	3	1	2
OG0001080	1	2	2	2	3	2	2	1	2	3	1	2	2	3	2	2	2	3
OG0001081	1	1	2	0	3	5	0	0	3	4	2	5	0	5	2	2	1	1
OG0001082	1	1	2	1	3	6	1	1	1	4	1	5	1	2	1	2	3	1
OG0001083	1	1	1	2	2	9	1	1	1	5	1	4	1	1	1	2	2	1
OG0001084	0	1	1	0	24	1	0	0	1	0	0	2	0	2	1	3	0	1
OG0001085	0	3	2	0	2	0	7	1	2	0	2	1	2	4	3	5	1	2
OG0001086	0	2	2	0	2	8	2	0	2	5	0	2	1	1	2	3	3	2
OG0001087	0	1	3	1	5	3	3	1	1	3	3	3	1	2	2	2	1	2
OG0001088	0	1	1	0	4	11	1	1	1	3	1	3	1	5	1	1	1	1
OG0001089	0	1	1	2	1	7	7	0	1	5	2	2	1	3	1	1	1	1
OG0001090	0	1	1	0	2	9	2	1	1	5	1	3	1	5	1	1	1	2
OG0001091	0	1	1	6	2	5	2	0	1	3	2	5	2	2	1	3	1	0
OG0001092	0	2	1	2	2	6	3	1	2	4	1	4	1	1	2	2	1	2
OG0001093	0	1	1	1	4	3	1	1	1	3	5	5	2	1	1	1	4	2
OG0001094	0	1	4	5	3	2	1	0	4	2	4	1	3	0	1	1	2	3
OG0001095	0	3	1	0	5	5	2	0	3	4	2	6	0	2	0	2	0	2
OG0001099	3	1	1	1	2	5	1	1	1	4	1	4	3	1	1	3	2	1
OG0001100	2	1	1	4	1	3	3	3	1	3	1	5	1	2	1	2	1	1
OG0001101	1	1	2	0	3	0	4	1	1	0	2	11	1	3	2	1	1	2
OG0001102	1	2	2	1	5	3	1	0	2	2	2	5	1	3	2	1	1	2
OG0001103	1	1	1	1	2	10	1	1	1	3	1	7	1	1	1	1	1	1
OG0001104	2	0	0	0	3	3	1	3	0	2	4	7	4	4	0	1	2	0
OG0001105	1	2	1	1	2	3	1	1	1	12	1	3	1	2	1	1	1	1
OG0001106	1	1	1	2	2	7	1	2	1	4	1	6	1	1	1	0	3	1
OG0001107	1	2	2	1	3	3	1	2	2	3	1	4	2	2	2	2	1	2
OG0001108	1	1	1	2	4	1	2	2	1	2	1	6	1	4	1	1	2	3
OG0001109	1	2	2	0	3	0	1	2	2	0	1	9	1	3	2	3	2	2
OG0001110	2	1	1	1	3	5	1	2	1	5	3	3	1	2	2	1	1	1
OG0001111	1	1	1	1	2	6	2	2	1	4	2	3	2	2	1	2	2	1
OG0001112	1	1	1	1	6	3	2	3	1	2	2	2	2	4	1	2	1	1
OG0001113	1	1	1	4	2	6	1	1	1	3	1	3	2	2	1	2	2	2
OG0001114	1	1	1	2	1	2	1	1	1	1	1	1	0	2	1	16	2	1
OG0001115	1	1	1	0	7	0	1	1	2	1	4	7	1	2	1	3	2	1
OG0001116	2	1	1	0	4	4	1	2	1	3	2	5	1	2	2	1	3	1
OG0001117	1	2	2	1	2	4	2	1	2	3	2	4	1	2	2	2	1	2
OG0001118	1	1	4	1	1	1	1	5	3	1	1	1	9	1	1	1	1	2
OG0001119	2	2	1	2	3	4	2	1	1	3	2	2	3	1	2	2	1	2
OG0001120	1	2	2	3	5	6	1	1	1	4	1	2	1	2	1	1	1	1
OG0001121	1	1	2	4	4	3	6	1	1	3	1	2	1	2	1	1	1	1
OG0001122	1	1	2	1	3	4	5	2	1	2	1	3	1	2	1	2	2	2
OG0001123	1	1	2	1	4	6	2	1	1	4	1	6	1	1	1	1	1	1
OG0001124	2	2	2	2	2	2	2	2	2	2	2	2	3	1	2	2	2	2
OG0001125	2	2	1	1	1	2	1	1	2	2	1	11	1	2	2	1	1	2
OG0001126	2	1	3	2	4	2	3	2	1	2	2	2	2	3	1	2	1	1
OG0001127	1	1	1	1	4	4	3	2	3	3	2	4	1	2	1	0	2	1
OG0001128	1	2	2	2	5	1	2	2	2	1	3	2	3	1	1	2	2	2
OG0001129	1	1	1	1	2	0	3	2	3	0	2	3	2	2	2	4	3	4
OG0001130	1	1	1	1	11	1	3	1	1	1	2	2	1	3	1	2	2	1
OG0001131	3	1	1	2	4	3	2	3	1	2	1	2	3	2	1	1	3	1
OG0001132	1	2	2	1	2	3	2	1	1	3	2	3	2	4	1	2	2	2
OG0001133	1	1	2	1	4	6	1	1	1	3	3	1	1	4	1	3	1	1
OG0001134	1	1	0	3	2	7	3	1	1	4	2	2	2	2	1	2	1	1
OG0001135	1	1	2	1	6	2	1	1	2	2	2	4	2	2	1	3	1	2
OG0001136	1	1	1	2	3	2	1	3	1	2	5	2	3	2	1	3	1	2
OG0001137	1	1	2	1	3	5	2	1	1	2	1	4	1	2	3	2	2	2
OG0001138	1	2	2	1	2	4	3	2	2	2	2	2	1	1	3	1	1	4
OG0001139	1	1	1	4	3	4	1	2	1	2	2	4	3	2	1	1	2	1
OG0001140	1	1	1	0	2	6	3	1	1	5	1	7	2	1	1	1	1	1
OG0001141	2	0	1	1	3	4	2	2	0	4	1	4	1	4	1	2	3	1
OG0001142	1	1	0	0	4	2	3	2	1	0	4	5	1	8	0	0	3	1
OG0001143	1	1	1	2	3	5	2	1	1	4	2	3	1	2	1	2	1	3
OG0001144	1	2	1	2	2	4	2	2	2	2	1	3	2	2	2	2	2	2
OG0001145	1	1	1	1	5	3	0	1	1	2	3	9	1	2	1	2	1	1
OG0001146	2	2	2	2	2	2	1	2	2	2	2	3	2	2	2	2	2	2
OG0001147	0	1	1	1	3	5	1	1	1	4	2	5	2	2	2	0	4	1
OG0001148	0	3	3	0	4	5	2	0	0	5	2	3	0	3	2	2	0	2
OG0001149	0	2	2	0	4	0	2	0	1	0	2	9	2	5	2	2	1	2
OG0001150	0	2	5	3	3	0	2	0	2	0	3	6	1	4	0	2	1	2
OG0001151	0	1	1	6	3	3	0	0	1	2	1	4	1	3	1	1	5	3
OG0001152	0	0	6	0	5	2	4	0	0	2	2	2	1	6	0	1	3	2
OG0001156	1	2	2	2	5	3	1	1	2	4	1	3	2	2	1	0	1	2
OG0001157	1	2	2	1	2	3	2	1	1	2	2	5	2	2	2	2	1	2
OG0001158	2	2	3	2	1	2	1	1	5	1	1	1	7	1	1	2	1	1
OG0001159	2	1	1	2	2	6	1	1	1	2	2	4	3	2	1	1	2	1
OG0001160	2	2	1	1	1	2	2	1	1	2	7	2	1	6	1	1	1	1
OG0001161	3	1	1	1	3	2	3	2	1	2	1	3	3	1	1	2	4	1
OG0001162	1	1	1	3	1	5	1	1	1	3	1	7	1	4	1	1	1	1
OG0001163	1	1	1	1	3	6	1	1	1	4	3	3	1	2	2	1	1	2
OG0001164	1	2	2	2	1	5	2	1	2	2	1	3	2	3	1	1	2	2
OG0001165	1	1	1	0	9	1	1	1	1	1	2	6	1	5	1	1	1	1
OG0001166	1	1	1	1	3	4	1	1	2	5	1	6	2	3	1	1	0	1
OG0001167	2	2	1	1	2	2	2	3	2	1	2	2	2	3	2	1	3	2
OG0001168	1	1	7	3	1	1	1	3	2	1	1	1	2	1	1	1	4	3
OG0001169	1	1	1	1	2	9	1	1	1	6	1	2	1	1	1	1	3	1
OG0001170	1	1	1	1	3	7	1	1	1	7	3	1	1	2	1	1	1	1
OG0001171	2	1	2	1	3	3	1	2	1	2	2	5	1	4	2	1	1	1
OG0001172	2	1	1	2	3	5	1	1	1	3	1	5	2	1	1	1	3	1
OG0001173	1	1	1	2	2	5	2	1	1	3	1	5	1	5	1	1	1	1
OG0001174	3	1	1	1	2	4	1	1	1	3	2	6	1	3	1	1	1	2
OG0001175	1	1	1	2	2	6	2	1	1	5	1	3	1	2	1	3	1	1
OG0001176	1	1	2	1	5	2	1	2	1	3	1	2	3	3	1	2	3	1
OG0001177	2	1	0	1	4	8	1	1	1	3	2	4	1	2	1	1	1	1
OG0001178	1	1	2	1	2	2	1	1	3	2	2	7	3	1	1	1	2	2
OG0001179	1	1	1	1	2	6	1	1	1	3	1	6	2	2	1	1	3	1
OG0001180	1	2	2	1	1	2	4	2	2	2	1	2	2	2	2	2	2	3
OG0001181	1	1	2	2	3	2	2	2	1	2	4	2	2	2	2	2	2	1
OG0001182	1	1	1	2	4	5	1	0	1	3	2	7	1	2	1	1	1	1
OG0001183	2	1	1	0	4	6	1	1	1	4	2	1	3	1	3	2	1	1
OG0001184	1	0	0	0	2	7	1	0	0	2	1	3	0	14	0	2	1	1
OG0001185	1	2	2	2	1	2	2	2	1	2	3	3	2	2	2	2	1	3
OG0001186	1	2	1	1	1	2	1	2	6	2	2	1	1	2	2	4	2	2
OG0001187	1	1	1	1	7	4	1	1	1	2	1	6	1	3	1	1	1	1
OG0001188	2	2	3	1	1	4	1	2	4	3	1	2	1	2	1	2	1	2
OG0001189	1	2	2	1	6	1	2	2	1	2	2	3	1	2	2	1	2	2
OG0001190	1	1	2	1	4	6	1	1	1	4	1	4	1	3	1	1	1	1
OG0001191	1	1	2	1	3	7	1	1	1	4	1	5	1	1	2	1	1	1
OG0001192	1	1	2	1	4	3	2	1	1	2	2	5	1	2	2	2	1	2
OG0001193	0	2	3	2	2	2	3	1	2	5	1	3	2	2	1	1	1	2
OG0001194	0	1	2	0	2	5	1	2	1	4	1	9	0	2	1	2	1	1
OG0001195	0	2	3	0	1	3	1	0	4	4	1	4	1	4	3	2	0	2
OG0001196	0	1	3	6	1	0	0	1	1	0	1	2	0	9	2	1	6	1
OG0001197	0	1	3	1	4	4	1	2	2	2	2	4	2	2	2	1	1	1
OG0001198	0	1	2	0	3	4	3	1	3	4	1	5	1	1	2	1	1	2
OG0001199	0	3	1	2	2	5	1	1	2	3	3	4	1	1	1	2	2	1
OG0001201	0	0	3	0	7	1	3	2	0	0	6	0	1	5	2	2	2	1
OG0001202	0	0	1	2	3	16	1	0	0	7	1	2	1	0	0	0	0	1
OG0001205	1	0	1	0	4	0	0	2	0	0	4	1	2	16	0	1	1	1
OG0001206	1	1	1	1	2	8	1	1	1	5	1	5	1	1	1	1	1	1
OG0001207	3	1	1	0	3	0	3	3	1	0	3	2	4	4	1	0	4	1
OG0001208	1	2	2	2	2	2	2	2	2	2	2	2	3	2	2	1	1	2
OG0001209	1	1	1	1	4	4	3	1	1	2	1	3	2	2	1	3	2	1
OG0001210	2	2	2	1	4	2	2	1	2	2	2	2	2	2	2	2	0	2
OG0001211	1	1	2	1	1	6	1	2	1	4	1	3	2	3	1	0	3	1
OG0001212	1	2	1	0	1	1	2	2	6	2	2	2	2	3	2	2	1	2
OG0001213	1	2	2	2	7	1	5	0	2	1	1	1	2	2	1	2	1	1
OG0001214	1	1	1	3	1	2	1	1	4	2	1	2	1	1	1	1	3	7
OG0001215	1	2	1	1	3	6	1	1	1	4	1	4	1	3	2	0	1	1
OG0001216	2	2	1	1	2	1	1	2	2	2	2	2	2	5	2	1	2	2
OG0001217	1	2	2	2	2	2	2	1	2	2	2	2	2	2	3	2	1	2
OG0001218	1	2	2	0	3	3	3	1	1	3	1	5	0	3	1	3	1	1
OG0001219	1	1	0	1	3	5	1	1	1	2	3	7	2	2	1	1	1	1
OG0001220	1	1	2	2	3	5	1	2	2	3	1	4	1	2	1	0	2	1
OG0001221	3	1	3	1	7	2	1	1	1	1	1	1	1	1	1	2	5	1
OG0001222	1	2	1	2	1	2	5	1	4	5	1	1	1	1	1	1	1	3
OG0001223	1	1	1	1	2	3	2	1	2	3	1	3	3	2	2	2	2	2
OG0001224	1	1	1	1	2	8	1	1	1	4	1	4	1	1	2	2	1	1
OG0001225	1	1	1	1	3	3	2	1	1	3	3	4	1	1	1	0	6	1
OG0001227	1	2	3	3	1	2	2	2	2	2	2	2	1	2	2	1	2	2
OG0001228	1	2	1	1	3	5	1	1	1	3	2	4	2	3	1	1	1	1
OG0001229	1	1	2	9	3	2	1	1	1	2	1	3	2	1	2	0	1	1
OG0001230	1	2	1	1	1	2	1	3	3	1	1	2	3	5	1	1	2	3
OG0001231	1	1	1	1	2	5	1	1	1	3	1	5	2	1	1	0	6	1
OG0001232	1	1	2	1	2	3	6	1	1	3	2	1	2	3	2	1	1	1
OG0001233	3	1	3	1	1	0	1	4	2	0	2	5	1	2	1	2	4	1
OG0001234	1	1	1	1	4	4	1	1	1	2	2	3	2	2	1	1	5	1
OG0001235	1	1	1	1	1	1	17	1	1	1	1	1	1	1	1	1	1	1
OG0001236	1	1	1	4	2	2	1	1	2	3	1	3	1	3	1	4	2	1
OG0001237	1	2	1	1	3	4	3	1	3	3	1	2	1	2	2	1	1	2
OG0001238	1	1	1	1	5	8	3	1	1	3	1	2	1	2	1	0	1	1
OG0001239	1	1	3	0	3	4	1	1	2	3	1	5	1	2	2	2	1	1
OG0001240	1	2	3	1	2	2	1	2	1	2	2	5	1	1	3	3	1	1
OG0001241	1	2	1	2	2	2	2	2	2	4	2	1	2	2	2	2	2	1
OG0001242	1	2	1	1	5	4	1	1	2	6	1	2	2	1	1	1	1	1
OG0001243	1	1	3	1	3	2	1	1	2	2	2	2	2	3	2	3	1	2
OG0001244	1	1	1	1	4	5	1	1	1	3	1	7	1	2	1	1	1	1
OG0001245	2	1	1	1	3	7	0	1	1	4	1	5	1	2	1	1	1	1
OG0001246	1	1	1	1	3	4	3	2	1	3	1	3	1	3	3	1	1	1
OG0001247	1	2	2	2	2	3	2	1	2	2	3	2	2	2	1	2	1	2
OG0001248	1	1	1	1	6	5	1	0	1	3	1	4	1	3	1	2	1	1
OG0001249	1	1	2	1	4	3	2	1	1	2	1	3	1	6	1	1	2	1
OG0001250	1	1	1	1	4	4	4	1	1	1	1	4	1	3	1	1	3	1
OG0001251	1	1	1	1	3	6	1	0	1	3	1	5	1	2	1	1	4	1
OG0001252	1	2	2	2	1	2	1	2	2	0	1	5	2	3	1	3	1	3
OG0001253	1	1	1	4	5	2	1	2	1	3	0	2	1	1	1	6	1	1
OG0001254	2	1	0	1	3	2	2	0	1	2	1	9	1	3	1	3	1	1
OG0001255	1	1	1	1	2	5	1	1	1	6	0	6	1	2	1	1	2	1
OG0001256	1	1	1	1	3	4	1	1	1	2	1	3	3	1	3	2	3	2
OG0001257	1	1	1	1	5	4	1	0	2	3	2	4	2	2	1	2	1	1
OG0001258	0	1	1	1	5	2	1	1	2	2	2	3	2	4	2	1	2	2
OG0001259	0	2	4	3	2	1	0	2	2	2	1	1	1	6	1	2	3	1
OG0001260	0	1	1	2	3	6	1	2	2	4	2	4	1	2	1	0	1	1
OG0001261	0	1	7	2	2	4	1	0	1	5	1	2	1	3	1	1	1	1
OG0001262	0	5	9	0	1	0	0	0	7	0	2	0	6	1	0	1	1	1
OG0001263	0	2	2	5	1	3	2	0	2	3	2	3	0	4	2	2	0	1
OG0001265	0	1	2	0	4	5	2	0	1	4	2	6	1	1	2	1	1	1
OG0001266	0	1	2	1	4	7	1	0	1	6	1	3	0	2	1	1	2	1
OG0001267	0	1	1	2	3	3	1	1	1	2	3	5	1	3	1	4	1	1
OG0001270	0	0	0	1	4	1	1	0	0	1	2	1	1	1	0	2	19	0
OG0001277	1	2	1	1	5	4	1	2	1	3	1	1	1	1	1	3	3	1
OG0001278	1	1	1	3	1	2	1	1	1	2	4	1	4	4	1	1	3	1
OG0001279	2	2	2	1	2	2	2	3	2	2	2	2	1	1	2	1	2	2
OG0001280	1	1	1	1	2	6	1	1	1	4	1	5	2	2	1	1	1	1
OG0001281	2	2	1	1	1	3	4	2	2	2	1	2	2	1	1	4	1	1
OG0001282	2	1	1	1	2	7	1	1	1	4	1	4	1	2	1	1	1	1
OG0001283	1	0	0	0	4	0	0	3	2	0	2	2	1	7	0	4	7	0
OG0001284	1	2	1	1	1	4	2	1	1	4	1	5	2	3	1	1	1	1
OG0001285	1	1	2	1	2	2	1	4	1	2	2	1	2	2	2	2	3	2
OG0001286	3	1	1	1	2	5	1	1	1	3	1	4	2	2	1	1	2	1
OG0001287	1	1	2	1	3	7	1	1	1	4	1	2	1	3	1	1	1	1
OG0001288	1	1	1	1	1	6	1	1	1	3	1	5	1	4	1	1	2	1
OG0001289	5	1	1	3	4	2	1	1	2	2	1	1	1	3	1	1	2	1
OG0001290	2	1	1	1	3	2	2	1	0	2	1	7	1	2	1	1	4	1
OG0001291	2	0	0	1	4	0	3	2	0	0	4	2	2	8	0	1	4	0
OG0001292	1	1	1	2	2	6	1	2	1	4	1	4	1	2	1	1	1	1
OG0001293	2	1	0	2	3	2	1	2	2	2	2	1	1	3	2	2	3	2
OG0001294	3	1	1	1	4	0	1	1	1	0	2	4	3	4	3	2	1	1
OG0001295	2	1	1	1	5	6	1	1	1	4	0	1	2	3	1	2	0	1
OG0001296	1	2	1	2	2	3	4	2	1	1	2	2	2	1	1	1	4	1
OG0001297	1	1	0	0	0	1	2	0	2	1	4	8	0	2	0	7	3	1
OG0001299	2	2	1	0	4	2	1	1	1	2	2	4	1	2	2	2	1	3
OG0001300	1	1	2	3	1	3	1	1	2	3	1	5	4	1	1	1	1	1
OG0001301	1	1	1	0	3	3	5	1	1	3	1	4	1	2	1	3	1	1
OG0001302	1	2	3	1	2	3	0	1	2	4	2	4	2	2	1	1	1	1
OG0001303	1	2	2	1	3	3	2	1	1	3	1	5	1	2	2	1	1	1
OG0001304	1	1	1	2	1	4	1	1	3	4	2	2	1	5	1	1	1	1
OG0001305	2	1	2	1	1	1	1	2	3	1	5	1	4	1	1	0	5	1
OG0001306	1	1	1	0	8	1	1	1	1	1	4	3	3	3	1	1	1	1
OG0001307	1	2	2	1	3	4	1	1	2	2	3	2	1	2	1	2	1	2
OG0001308	2	1	1	2	4	4	2	1	1	3	1	3	1	3	1	1	1	1
OG0001309	1	1	1	1	3	3	3	1	1	3	2	4	2	3	1	1	1	1
OG0001310	2	2	1	1	2	0	3	2	2	0	1	6	1	2	1	2	3	2
OG0001311	1	1	1	3	2	2	2	3	1	2	1	3	2	1	1	2	4	1
OG0001312	2	1	1	6	3	2	1	1	1	2	1	1	2	5	2	0	1	1
OG0001313	1	1	1	1	3	4	2	1	1	4	1	5	1	2	1	1	2	1
OG0001314	1	1	1	2	2	8	1	1	1	5	1	2	2	1	1	1	1	1
OG0001315	1	2	1	1	3	3	2	1	2	2	2	4	1	2	1	2	1	2
OG0001316	1	2	1	1	2	3	2	2	2	2	1	2	2	2	2	2	2	2
OG0001317	1	1	1	1	2	6	1	1	1	4	2	5	2	1	1	1	1	1
OG0001318	1	1	1	1	2	7	1	1	1	4	3	4	1	1	1	1	1	1
OG0001319	1	1	0	1	2	2	1	2	1	1	1	1	1	1	1	14	1	1
OG0001320	1	1	1	5	2	1	1	5	1	1	1	2	4	1	1	1	3	1
OG0001321	1	1	1	1	5	5	1	1	1	4	1	6	0	2	1	1	0	1
OG0001322	1	1	2	1	3	4	1	1	1	2	1	4	3	2	2	2	1	1
OG0001323	1	1	1	0	7	5	1	1	1	2	3	1	1	4	2	1	0	1
OG0001324	1	1	0	0	3	7	2	1	2	4	3	0	2	3	1	0	2	1
OG0001325	1	2	1	1	3	5	1	1	1	4	1	4	1	2	1	0	3	1
OG0001326	2	2	1	2	3	2	1	1	2	2	1	1	2	2	2	1	4	2
OG0001327	1	2	2	1	1	3	1	1	2	2	1	6	1	3	0	1	1	4
OG0001328	1	1	1	6	3	3	1	1	1	2	1	2	4	2	1	1	1	1
OG0001329	1	1	3	1	4	3	0	1	1	3	3	2	1	2	3	1	2	1
OG0001330	2	3	2	1	2	2	1	1	2	2	1	2	2	2	2	2	2	2
OG0001331	1	1	1	2	1	3	3	1	2	5	3	2	1	2	1	1	2	1
OG0001332	1	1	2	1	2	6	1	1	1	3	1	2	3	2	1	1	1	3
OG0001333	1	1	2	1	1	2	6	2	2	1	1	2	2	3	1	0	4	1
OG0001334	1	2	1	0	2	5	2	2	1	4	1	4	3	2	1	1	0	1
OG0001335	1	3	2	2	3	1	1	2	2	0	1	7	1	2	0	1	2	2
OG0001336	1	1	2	1	4	5	2	1	1	3	1	2	1	3	1	1	2	1
OG0001337	1	2	3	1	2	2	1	3	2	2	2	2	1	1	2	2	2	2
OG0001338	1	2	1	3	3	4	1	1	1	3	1	3	3	2	1	1	1	1
OG0001339	1	2	1	1	5	4	1	1	2	3	1	2	1	3	1	1	2	1
OG0001340	1	4	1	1	3	2	0	0	2	3	5	3	3	1	1	1	1	1
OG0001341	1	1	3	0	3	3	1	1	1	2	5	4	2	3	1	0	1	1
OG0001342	1	0	0	4	4	1	4	1	1	3	1	3	1	2	2	3	1	1
OG0001343	0	2	3	1	2	0	2	1	2	0	2	4	3	5	2	0	2	2
OG0001344	0	2	1	1	6	3	1	2	1	3	1	4	1	3	1	1	1	1
OG0001345	0	1	1	1	5	5	1	1	1	3	1	4	2	3	1	1	0	2
OG0001346	0	1	2	1	5	1	2	1	1	1	0	5	1	7	1	2	1	1
OG0001347	0	1	1	1	3	2	1	2	1	1	5	6	4	1	1	1	1	1
OG0001348	0	8	3	2	0	1	1	1	2	2	2	1	2	1	2	3	0	2
OG0001349	0	1	2	1	5	4	1	1	1	4	1	4	1	2	1	2	1	1
OG0001350	0	1	1	1	3	4	2	0	1	3	2	4	3	1	2	1	0	4
OG0001351	0	2	2	1	3	3	2	2	2	3	3	3	1	1	2	1	0	2
OG0001352	0	15	3	0	0	0	0	0	2	0	1	3	1	1	2	1	1	3
OG0001354	0	2	3	1	3	2	3	1	2	2	3	2	1	2	2	2	0	2
OG0001355	0	1	1	1	3	3	2	1	1	7	2	4	1	1	1	1	1	2
OG0001356	0	1	1	2	2	5	1	2	1	3	1	8	1	1	1	1	1	1
OG0001357	0	1	2	2	7	1	4	1	1	1	5	1	1	1	2	1	0	2
OG0001358	0	0	2	0	4	2	4	1	0	1	2	4	4	3	3	1	0	2
OG0001360	0	0	1	0	2	1	22	0	0	1	2	1	0	1	0	1	0	1
OG0001361	0	0	2	1	3	3	1	1	2	2	3	5	0	4	2	2	1	1
OG0001364	1	1	1	1	6	1	4	3	1	1	1	3	1	1	2	1	2	1
OG0001365	1	2	2	1	3	1	1	0	3	1	1	6	3	3	1	0	2	1
OG0001366	1	1	0	1	1	6	1	1	1	5	1	3	1	5	1	1	1	1
OG0001367	1	1	1	1	4	4	1	1	1	4	1	3	1	4	1	1	1	1
OG0001368	3	1	1	1	3	4	1	1	1	2	1	4	2	3	1	1	1	1
OG0001369	1	1	1	3	4	2	1	1	4	1	2	1	5	1	1	1	1	1
OG0001370	1	1	0	2	3	6	1	1	1	3	1	4	1	3	1	1	1	1
OG0001371	2	1	1	4	2	2	1	1	3	2	1	4	1	1	1	2	1	2
OG0001372	2	1	1	3	3	0	1	2	1	0	3	3	3	3	1	2	2	1
OG0001373	1	1	1	1	1	4	1	1	2	3	1	3	1	2	2	1	3	3
OG0001374	1	1	1	4	2	1	1	1	1	3	4	5	1	1	2	1	1	1
OG0001375	3	1	1	1	4	0	1	2	1	0	2	6	2	4	1	1	1	1
OG0001376	1	1	1	1	4	1	3	2	1	1	3	3	2	3	1	1	2	1
OG0001377	2	1	1	1	0	2	1	3	1	2	2	2	7	2	1	1	2	1
OG0001379	1	2	1	2	3	2	2	2	1	2	2	3	2	2	1	1	1	2
OG0001380	2	2	1	1	3	2	2	1	1	2	2	2	2	1	2	2	2	2
OG0001381	1	1	1	1	2	3	4	1	1	2	3	6	1	1	1	1	1	1
OG0001382	1	1	1	1	2	3	1	1	3	2	5	2	1	2	1	1	3	1
OG0001383	1	1	2	1	6	2	1	1	1	2	4	2	1	2	1	2	1	1
OG0001384	2	1	1	1	2	4	0	1	1	2	1	8	1	1	1	1	3	1
OG0001385	1	2	2	1	2	2	1	1	9	2	1	1	2	2	1	0	1	1
OG0001386	2	1	1	1	2	3	2	2	1	3	1	4	2	2	1	1	2	1
OG0001387	2	2	1	1	3	2	1	2	3	1	1	4	1	2	1	2	2	1
OG0001388	1	1	1	6	5	1	2	1	1	1	1	5	1	1	1	1	1	1
OG0001389	1	3	1	1	2	1	1	2	3	1	1	3	2	3	1	1	4	1
OG0001390	1	0	0	0	3	7	1	2	0	7	2	6	0	1	0	1	1	0
OG0001391	1	1	1	0	7	3	2	0	1	3	1	3	1	2	1	2	2	1
OG0001392	2	1	1	1	2	2	3	2	1	2	2	1	1	2	3	2	3	1
OG0001393	1	1	1	1	2	4	1	1	8	2	1	2	1	2	1	1	1	1
OG0001394	1	2	1	2	3	2	3	2	1	3	2	2	1	2	2	1	1	1
OG0001395	1	1	2	1	2	3	2	1	2	2	2	3	1	3	1	2	1	2
OG0001396	1	2	2	1	3	2	2	1	2	2	2	2	2	2	2	2	0	2
OG0001397	1	1	1	1	1	2	1	1	3	3	1	4	3	2	1	2	1	3
OG0001398	2	1	1	2	4	2	1	1	1	2	3	3	2	2	1	1	2	1
OG0001399	1	1	2	1	2	3	2	0	1	2	2	4	5	2	0	1	1	2
OG0001400	1	1	1	1	3	7	1	1	1	4	1	4	1	1	1	1	1	1
OG0001401	1	1	1	2	2	4	1	0	2	9	1	2	1	1	1	1	1	1
OG0001402	1	1	3	1	7	1	2	0	1	1	5	1	2	1	1	1	1	2
OG0001403	2	1	4	1	6	1	2	0	0	2	2	4	0	4	0	1	1	1
OG0001404	1	1	1	1	10	2	1	1	1	2	0	1	3	3	1	1	1	1
OG0001405	1	3	1	1	3	3	1	2	2	1	2	2	1	4	1	0	1	3
OG0001406	1	1	2	1	2	3	2	1	1	3	2	3	2	2	1	2	2	1
OG0001407	1	2	2	1	2	2	1	1	2	2	2	2	2	3	2	2	1	2
OG0001408	1	1	2	2	2	3	1	1	1	2	2	2	1	3	2	3	1	2
OG0001409	1	1	1	1	3	3	4	1	1	3	1	5	1	2	1	1	1	1
OG0001410	1	1	1	1	5	2	1	1	1	2	1	6	2	3	1	1	1	1
OG0001411	1	1	1	1	4	5	1	1	1	4	1	5	1	1	1	1	1	1
OG0001412	1	1	2	1	1	3	2	1	2	5	1	2	1	2	3	1	1	2
OG0001413	1	1	1	3	1	6	1	1	1	3	1	4	2	1	1	1	2	1
OG0001414	1	0	1	1	2	7	2	1	2	4	0	4	1	2	1	1	1	1
OG0001415	1	2	1	2	3	2	3	1	2	2	1	2	2	1	2	2	1	2
OG0001416	2	2	2	1	2	1	2	2	2	1	2	2	1	2	2	2	3	1
OG0001417	1	2	1	1	1	2	5	1	1	2	1	3	1	1	5	1	1	2
OG0001418	1	1	2	0	2	5	2	1	1	4	0	4	2	3	2	1	0	1
OG0001419	1	1	1	1	3	4	1	3	1	4	0	5	1	2	1	1	1	1
OG0001420	1	1	1	2	3	3	1	1	1	3	2	4	2	2	1	2	1	1
OG0001421	1	1	2	1	5	3	1	0	1	2	3	5	1	2	1	1	1	1
OG0001422	1	1	2	2	3	2	1	3	1	2	4	2	2	1	2	1	1	1
OG0001423	1	0	2	0	2	5	1	1	1	3	3	4	1	2	2	2	1	1
OG0001424	1	1	2	0	6	2	2	1	1	1	3	3	2	3	1	1	1	1
OG0001425	1	1	0	3	2	3	2	2	1	2	2	2	3	1	2	1	3	1
OG0001426	1	1	1	1	1	6	6	1	1	3	1	2	1	1	1	1	2	1
OG0001427	1	2	2	1	1	4	1	1	1	4	1	3	1	1	3	1	1	3
OG0001428	0	2	1	3	3	1	2	1	1	2	2	1	1	5	2	2	2	1
OG0001429	0	1	1	0	3	7	1	0	1	3	1	2	0	7	3	1	0	1
OG0001430	0	1	2	1	5	1	8	0	1	4	0	3	1	0	0	3	0	2
OG0001431	0	1	1	1	4	6	2	0	1	4	1	6	2	1	1	1	0	0
OG0001432	0	1	1	0	2	4	2	3	1	2	1	5	2	2	1	3	1	1
OG0001433	0	2	3	1	3	3	1	0	2	3	1	3	2	2	0	4	0	2
OG0001435	0	1	1	1	3	5	1	1	1	3	3	5	0	2	1	1	1	2
OG0001436	0	2	2	1	7	1	2	1	1	1	2	4	0	3	1	1	2	1
OG0001437	0	2	3	0	2	1	4	1	1	1	2	4	1	1	4	1	1	3
OG0001438	0	1	2	3	1	4	2	1	1	3	1	2	1	3	1	2	1	3
OG0001439	0	2	1	1	2	4	1	2	2	2	2	2	1	2	3	2	1	2
OG0001441	0	2	2	1	3	4	1	1	1	3	2	4	0	2	2	1	1	2
OG0001442	0	1	2	2	12	1	1	0	0	0	7	3	0	2	1	0	0	0
OG0001444	0	0	2	0	2	3	1	1	1	2	2	9	2	1	1	3	1	1
OG0001456	1	1	2	1	3	5	1	0	1	3	1	6	1	1	1	1	1	1
OG0001457	3	1	1	1	1	2	1	1	4	2	4	2	2	1	1	0	3	1
OG0001458	1	0	1	1	1	7	1	1	1	4	2	1	1	5	1	1	1	1
OG0001459	2	1	1	2	2	7	1	1	2	4	1	1	1	1	1	1	1	1
OG0001460	1	1	1	4	2	3	1	1	1	3	1	3	1	4	1	1	1	1
OG0001461	1	1	1	3	2	2	1	2	5	1	2	1	1	4	1	1	1	1
OG0001462	1	1	1	1	2	3	1	1	1	3	1	8	1	2	1	1	1	1
OG0001463	1	1	1	1	3	5	2	1	1	4	1	3	1	1	1	2	1	1
OG0001464	1	0	0	2	5	3	2	1	0	4	2	5	1	1	0	2	2	0
OG0001465	1	1	1	1	2	2	1	1	1	3	1	3	1	1	1	8	1	1
OG0001466	1	1	3	1	5	4	1	1	1	4	1	2	1	2	1	0	1	1
OG0001467	1	1	1	1	2	5	1	1	1	3	1	6	2	1	1	0	2	1
OG0001468	1	4	1	5	2	1	1	1	2	1	1	2	1	2	1	2	1	2
OG0001469	2	1	1	1	3	4	1	0	1	3	2	6	1	1	1	2	0	1
OG0001470	1	2	1	1	2	1	2	1	2	1	3	3	3	2	2	1	1	2
OG0001471	1	1	1	1	4	3	1	1	1	2	2	3	2	2	2	1	2	1
OG0001472	1	3	2	1	5	2	4	1	1	2	0	2	1	1	1	2	1	1
OG0001473	1	2	1	1	3	4	1	1	1	3	1	3	1	3	2	1	1	1
OG0001474	1	1	1	1	2	4	1	1	1	2	1	6	2	3	1	1	1	1
OG0001475	1	1	1	2	3	3	1	1	2	3	1	3	1	2	2	1	1	2
OG0001476	1	1	1	1	1	5	2	2	1	5	1	2	1	3	1	1	1	1
OG0001477	1	1	1	2	1	6	1	1	1	4	1	3	1	1	1	3	1	1
OG0001478	1	2	3	1	2	0	1	1	1	2	0	2	4	2	3	2	1	3
OG0001479	2	1	1	2	2	4	1	1	1	5	1	3	2	1	1	1	1	1
OG0001480	1	1	1	1	3	3	1	2	1	2	1	3	1	3	1	3	2	1
OG0001481	1	2	1	3	3	4	1	1	1	4	1	4	1	1	1	1	0	1
OG0001482	2	1	1	1	5	2	2	1	1	2	2	2	1	2	2	2	1	1
OG0001483	2	1	1	1	3	2	2	1	1	2	4	4	1	2	1	1	1	1
OG0001484	1	1	1	1	3	4	1	1	1	4	1	6	1	1	1	1	1	1
OG0001485	2	0	0	1	2	7	1	0	0	4	1	5	2	2	1	1	1	1
OG0001486	2	0	1	1	3	4	2	0	0	3	2	3	1	3	3	1	1	1
OG0001487	1	1	1	1	1	5	1	1	1	3	1	7	1	2	1	1	1	1
OG0001488	1	1	1	1	1	1	2	1	1	1	1	1	11	2	1	1	2	1
OG0001489	1	1	1	1	2	1	3	2	1	2	1	7	1	2	1	2	1	1
OG0001491	1	2	1	1	2	6	1	1	1	3	1	4	1	1	1	1	1	2
OG0001492	1	1	1	2	1	1	1	4	1	1	2	1	2	2	1	4	4	1
OG0001493	1	1	1	1	3	3	1	2	1	2	2	4	1	3	1	2	1	1
OG0001494	1	1	1	1	2	4	1	1	1	4	2	4	1	1	1	3	1	1
OG0001495	1	1	2	1	3	3	1	1	1	2	4	5	1	1	1	1	1	1
OG0001496	1	2	1	2	2	5	1	1	3	3	2	3	1	1	1	0	1	1
OG0001497	1	1	1	1	4	2	2	1	1	2	1	2	1	3	2	3	2	1
OG0001498	1	1	1	1	4	1	1	1	2	1	1	5	2	2	2	2	2	1
OG0001499	1	3	1	2	1	3	1	1	2	3	2	2	2	1	1	3	1	1
OG0001500	1	1	1	5	1	1	1	1	6	2	1	1	4	1	1	1	1	1
OG0001501	1	1	1	1	2	4	1	1	1	3	3	3	1	4	1	1	1	1
OG0001502	1	1	1	2	3	3	2	1	2	2	3	1	2	3	1	0	2	1
OG0001503	1	1	1	1	1	4	1	1	1	3	1	3	1	3	1	3	3	1
OG0001504	1	3	3	2	1	2	1	2	1	2	2	1	1	3	1	3	1	1
OG0001505	1	1	1	1	2	3	3	1	1	3	1	2	2	3	2	2	1	1
OG0001506	1	1	2	1	6	4	1	1	1	2	1	3	1	2	1	1	1	1
OG0001507	1	2	1	1	2	7	1	1	1	1	1	2	3	2	1	2	1	1
OG0001509	1	1	2	1	3	6	1	1	1	3	1	1	2	2	1	1	2	1
OG0001510	1	1	2	1	5	3	1	1	1	2	0	2	2	2	1	1	4	1
OG0001511	1	1	1	1	5	3	1	1	1	3	1	6	1	1	1	1	1	1
OG0001512	1	1	2	1	5	2	2	3	1	1	1	2	1	1	2	2	1	2
OG0001513	1	1	1	2	3	3	1	2	1	2	1	2	1	4	1	1	3	1
OG0001514	2	1	0	1	5	4	1	1	1	2	3	2	1	2	1	1	2	1
OG0001515	1	1	1	2	5	4	2	1	1	1	1	4	0	3	1	1	1	1
OG0001516	1	1	1	0	3	2	3	1	1	3	3	3	0	1	2	3	2	1
OG0001517	0	1	1	2	3	8	1	1	1	4	1	2	1	2	1	1	0	1
OG0001518	0	5	1	0	1	6	1	0	2	4	2	2	0	3	1	2	0	1
OG0001519	0	2	1	0	2	3	3	1	2	3	1	3	4	1	2	2	0	1
OG0001520	0	1	2	1	2	10	0	0	1	5	2	2	0	1	0	1	1	2
OG0001521	0	1	1	2	5	1	2	1	1	1	5	1	0	2	1	1	4	2
OG0001522	0	1	0	0	8	1	1	0	0	2	3	4	1	5	1	3	0	1
OG0001523	0	3	1	1	3	2	1	1	3	1	1	4	0	2	2	3	1	2
OG0001524	0	1	1	1	1	3	5	1	1	1	4	4	2	1	2	1	1	1
OG0001525	0	1	2	1	0	6	2	1	1	4	1	5	1	1	1	1	2	1
OG0001526	0	1	1	1	4	3	3	4	1	2	1	3	1	2	1	1	1	1
OG0001527	0	1	1	1	3	3	1	1	1	2	1	5	1	7	1	1	0	1
OG0001528	0	1	2	0	5	2	0	0	1	1	4	9	0	3	3	0	0	0
OG0001529	0	1	1	1	2	7	1	1	1	5	0	2	1	2	1	1	1	3
OG0001530	0	1	1	1	2	6	1	0	0	6	1	6	2	1	1	1	0	1
OG0001531	0	2	1	1	5	2	1	2	1	2	1	2	3	2	1	2	1	2
OG0001532	0	2	1	2	1	1	4	1	2	3	2	5	0	0	1	3	2	1
OG0001533	0	2	2	1	1	3	1	0	2	2	3	4	1	2	1	2	2	2
OG0001535	0	2	2	2	2	3	2	1	2	3	1	3	2	2	1	0	1	2
OG0001536	0	2	2	0	1	4	2	0	3	2	2	5	3	1	1	1	0	2
OG0001537	0	1	4	1	2	4	1	1	1	2	1	3	1	3	3	0	1	2
OG0001538	0	1	1	1	3	5	1	1	1	3	1	6	0	2	1	1	2	1
OG0001539	0	2	3	0	3	2	1	0	1	2	3	5	0	1	3	2	2	1
OG0001540	0	1	1	2	3	4	1	1	1	1	1	1	3	1	0	1	8	1
OG0001542	0	2	1	1	2	4	6	1	2	1	1	1	2	1	1	2	2	1
OG0001543	0	1	1	0	2	5	2	1	1	3	2	4	0	4	1	2	1	1
OG0001544	0	1	3	1	3	3	1	1	1	3	3	4	0	2	2	1	0	2
OG0001545	0	2	1	15	0	3	5	0	1	1	0	0	0	1	1	0	0	1
OG0001546	0	1	1	0	4	5	1	1	2	4	1	2	1	3	1	1	2	1
OG0001549	0	0	1	0	10	3	1	0	0	3	2	4	0	2	1	3	0	1
OG0001550	0	0	0	3	3	4	1	1	0	5	4	4	2	1	1	1	1	0
OG0001554	1	1	1	1	2	2	2	1	1	2	3	2	2	3	2	2	1	1
OG0001555	1	1	1	2	2	3	1	1	1	2	3	3	1	2	2	1	2	1
OG0001556	1	1	0	1	2	6	1	1	1	4	1	3	1	2	2	1	1	1
OG0001557	1	1	1	1	3	7	1	0	3	4	1	1	1	1	1	1	1	1
OG0001558	2	1	1	2	1	3	1	3	2	2	1	2	1	2	1	1	1	3
OG0001559	1	1	1	1	8	2	2	1	1	2	1	2	1	1	1	2	1	1
OG0001560	1	1	1	1	1	3	2	3	1	2	1	6	0	2	1	1	2	1
OG0001561	1	1	2	1	4	0	1	1	1	1	1	3	1	7	1	1	2	1
OG0001562	2	1	1	0	1	4	3	0	1	3	2	5	1	4	0	1	1	0
OG0001563	1	1	2	2	2	5	4	1	1	3	1	1	1	2	1	0	1	1
OG0001564	1	1	2	1	2	5	1	1	1	3	1	2	1	3	2	1	1	1
OG0001565	1	1	1	1	4	3	1	1	1	4	1	3	1	3	1	1	1	1
OG0001566	1	1	1	1	3	6	1	1	1	3	1	4	1	1	1	1	1	1
OG0001567	1	1	0	0	1	3	1	1	1	4	1	6	3	2	2	1	1	1
OG0001568	1	1	1	2	5	2	2	2	1	2	1	2	1	2	1	2	1	1
OG0001569	1	1	1	1	1	4	1	1	1	3	1	5	1	3	2	1	1	1
OG0001570	3	1	1	1	3	1	5	1	1	0	2	2	1	3	1	1	2	1
OG0001571	1	1	1	1	3	4	1	1	1	3	1	2	4	1	1	2	1	1
OG0001572	1	2	1	0	4	3	1	1	1	3	2	3	0	2	2	2	1	1
OG0001573	1	1	2	1	2	6	1	0	1	5	1	2	1	2	2	1	0	1
OG0001574	1	1	1	1	2	5	1	1	1	2	1	6	1	2	1	1	1	1
OG0001575	1	1	1	2	2	2	2	1	1	2	2	2	2	3	1	2	1	2
OG0001576	1	1	1	1	3	6	2	1	1	4	1	2	1	1	1	1	1	1
OG0001577	1	1	1	1	3	2	1	1	2	3	1	4	2	2	2	1	1	1
OG0001578	2	2	2	1	2	4	1	1	3	2	1	1	1	2	1	1	1	2
OG0001579	1	1	1	1	3	5	1	1	1	3	1	4	1	2	1	1	1	1
OG0001580	1	1	2	1	5	3	1	1	1	3	1	3	1	2	1	1	1	1
OG0001581	1	1	1	1	2	5	1	1	1	4	1	4	1	2	1	1	1	1
OG0001582	1	1	1	1	2	5	1	1	1	3	2	4	1	2	1	1	1	1
OG0001583	1	1	2	4	3	0	1	1	1	0	1	6	1	4	1	1	1	1
OG0001584	1	1	1	1	3	1	1	1	1	1	3	8	1	1	1	2	1	1
OG0001585	1	1	1	1	6	2	1	1	1	4	1	2	3	2	1	1	0	1
OG0001586	1	1	2	2	2	1	1	1	1	1	2	7	2	1	1	2	1	1
OG0001587	1	1	1	1	2	1	11	1	1	1	1	1	1	2	1	1	1	1
OG0001588	1	1	1	1	4	4	1	1	1	3	1	2	1	4	1	1	1	1
OG0001589	2	1	1	1	3	4	2	1	1	3	1	3	1	2	1	1	1	1
OG0001590	2	2	0	3	2	4	1	1	1	3	1	2	1	1	1	2	2	1
OG0001591	2	2	1	3	2	2	1	1	2	2	2	1	2	1	1	1	3	1
OG0001592	1	1	1	1	2	4	1	1	1	3	1	6	1	2	1	1	1	1
OG0001593	1	1	1	1	2	3	2	1	1	2	1	4	1	3	1	2	2	1
OG0001594	1	1	1	1	2	4	1	1	1	3	1	6	1	2	1	1	1	1
OG0001595	1	0	1	0	2	3	1	2	0	2	2	4	1	3	1	4	2	1
OG0001596	2	1	3	1	0	6	1	1	1	3	1	2	2	0	0	1	4	1
OG0001597	1	1	1	1	1	5	0	1	1	3	1	7	1	1	1	1	2	1
OG0001598	1	1	2	1	3	3	1	1	2	2	1	2	1	4	1	2	1	1
OG0001599	1	1	1	1	2	5	1	2	2	3	1	1	2	2	1	1	2	1
OG0001600	1	1	2	1	2	3	1	1	1	2	1	3	2	3	2	1	1	2
OG0001601	1	1	1	2	2	3	1	3	1	2	1	2	1	2	1	4	1	1
OG0001602	1	1	2	1	3	2	1	1	2	2	1	5	2	2	1	1	1	1
OG0001603	1	1	2	1	4	3	1	0	1	2	3	2	1	3	1	1	2	1
OG0001604	1	1	2	1	1	5	1	1	1	3	1	5	1	2	1	1	1	1
OG0001605	1	1	1	1	4	5	1	1	1	3	1	3	1	2	1	1	1	1
OG0001606	2	2	1	1	2	1	1	1	1	2	1	2	4	1	1	2	4	1
OG0001607	1	2	1	2	0	2	2	1	2	2	2	2	2	2	2	2	1	2
OG0001608	1	1	1	3	2	3	1	1	1	3	1	3	2	1	1	1	2	2
OG0001609	1	1	1	1	3	5	1	1	1	4	0	2	1	3	1	1	2	1
OG0001610	1	1	1	1	3	3	2	0	1	3	1	7	1	1	0	2	1	1
OG0001611	1	0	1	1	8	1	1	1	0	1	2	2	1	6	1	0	3	0
OG0001612	1	1	1	1	2	3	1	1	1	3	1	1	1	1	1	1	8	1
OG0001613	1	1	2	1	3	1	4	1	1	1	1	2	1	4	1	1	3	1
OG0001614	1	2	1	1	1	5	1	1	2	1	1	2	3	1	1	2	1	3
OG0001615	1	1	2	1	4	4	1	0	1	2	1	5	1	1	1	1	2	1
OG0001616	1	1	3	1	4	3	1	1	1	2	1	3	1	1	1	1	3	1
OG0001617	1	1	1	1	5	1	1	0	1	1	3	5	1	4	1	1	1	1
OG0001618	1	1	2	1	0	5	3	1	1	3	1	1	2	1	1	4	1	1
OG0001619	1	1	1	4	1	4	0	4	1	4	1	2	0	1	1	2	1	1
OG0001620	1	1	2	1	4	3	1	1	1	2	1	5	1	1	1	1	2	1
OG0001621	1	1	1	1	3	5	1	1	1	3	1	5	1	1	1	1	0	2
OG0001622	1	2	3	1	3	2	2	1	1	1	2	2	1	3	1	2	1	1
OG0001623	1	1	2	2	2	1	1	1	1	1	2	5	0	5	1	3	0	1
OG0001624	1	1	2	1	1	3	1	1	1	3	1	2	1	2	2	1	4	2
OG0001625	2	1	1	2	1	3	1	3	2	2	1	2	1	4	1	1	1	1
OG0001626	1	2	2	2	2	1	1	2	2	1	2	1	3	1	1	2	2	2
OG0001627	1	1	1	1	2	3	2	1	2	3	1	4	2	2	1	1	1	1
OG0001628	1	1	2	1	4	4	1	1	1	2	1	3	2	2	1	1	1	1
OG0001629	1	1	0	1	1	7	1	1	1	5	1	3	1	2	1	1	1	1
OG0001630	1	1	2	1	3	3	1	1	1	3	2	1	1	2	2	2	2	1
OG0001631	1	0	0	1	3	6	1	2	0	3	2	4	1	1	0	1	4	0
OG0001632	1	1	2	1	3	4	1	1	1	4	1	0	1	3	1	1	2	2
OG0001633	1	3	1	0	2	5	1	1	1	0	1	1	4	1	1	3	3	1
OG0001634	1	1	2	1	3	1	2	1	1	4	1	2	1	2	2	2	1	2
OG0001635	1	1	1	1	2	5	1	1	1	3	1	4	1	3	1	1	1	1
OG0001636	0	1	1	1	1	3	2	1	1	2	1	2	1	1	1	9	1	1
OG0001637	0	2	1	1	1	7	1	1	0	6	1	2	1	1	1	1	0	3
OG0001638	0	4	3	0	1	1	1	1	3	2	1	1	3	1	1	1	1	5
OG0001639	0	1	1	1	2	6	1	1	1	3	1	5	1	2	1	1	1	1
OG0001640	0	1	1	0	2	10	2	1	1	5	1	2	0	1	1	1	0	1
OG0001641	0	3	3	2	2	2	0	0	3	0	6	1	2	2	2	1	0	1
OG0001642	0	2	1	1	2	2	2	1	2	2	2	2	2	2	2	2	1	2
OG0001643	0	5	2	1	2	3	2	1	3	2	2	0	1	1	1	1	1	2
OG0001644	0	1	1	1	3	3	2	1	1	2	1	8	1	1	1	0	1	2
OG0001646	0	1	1	1	1	8	1	1	1	5	1	3	1	1	1	1	1	1
OG0001647	0	1	1	0	2	0	1	0	1	1	5	3	10	2	1	1	0	1
OG0001648	0	1	1	1	3	5	1	2	1	2	2	4	1	2	1	1	0	2
OG0001649	0	1	1	0	4	2	3	0	2	2	1	4	1	3	1	2	2	1
OG0001650	0	3	2	0	1	2	1	0	4	1	4	2	1	4	1	2	0	2
OG0001651	0	1	0	0	2	3	1	1	1	3	1	9	1	2	2	1	1	1
OG0001652	0	1	2	0	1	4	1	1	1	3	1	6	0	1	2	2	3	1
OG0001653	0	1	0	1	3	1	2	2	0	1	2	6	1	4	2	1	1	2
OG0001654	0	2	5	0	2	2	6	0	3	1	0	1	0	4	2	1	0	1
OG0001655	0	1	1	0	4	2	4	1	4	2	1	3	1	1	1	1	2	1
OG0001656	0	2	1	1	2	5	2	1	1	3	2	1	1	2	2	2	1	1
OG0001657	0	0	1	2	3	5	3	1	0	3	2	3	1	3	0	2	1	0
OG0001658	0	0	0	1	2	3	0	1	4	3	1	7	1	2	2	1	1	1
OG0001660	1	1	1	1	2	3	1	1	1	3	0	6	2	2	1	1	1	1
OG0001661	2	1	1	1	2	3	1	2	1	2	1	4	2	1	1	1	2	1
OG0001662	1	1	1	3	2	2	1	1	1	2	1	2	1	5	1	1	1	2
OG0001663	2	1	1	1	1	6	1	1	1	3	1	3	2	1	1	1	1	1
OG0001664	1	1	2	0	2	3	1	1	1	3	1	4	1	3	1	2	1	1
OG0001665	1	1	1	1	2	4	1	2	2	3	2	3	1	1	1	1	1	1
OG0001666	2	1	1	1	2	2	1	2	1	2	1	6	1	2	1	1	1	1
OG0001667	3	1	1	0	5	1	1	2	1	0	1	4	1	2	1	1	3	1
OG0001668	1	1	1	1	2	3	1	1	1	3	1	7	1	1	1	1	1	1
OG0001669	1	1	0	1	3	4	1	1	2	3	1	4	1	2	1	1	1	1
OG0001670	1	1	1	1	2	3	2	1	1	2	3	3	1	2	1	1	2	1
OG0001671	1	1	2	1	2	3	1	1	2	3	1	2	2	1	1	0	3	2
OG0001672	1	2	2	1	2	5	3	1	1	2	1	2	1	1	1	1	1	1
OG0001673	2	2	1	1	1	2	1	1	4	1	1	4	1	1	2	1	1	2
OG0001674	1	1	1	0	2	4	1	1	1	3	1	5	1	3	1	1	1	1
OG0001675	1	1	1	1	1	5	1	1	1	3	1	3	2	2	1	2	1	1
OG0001676	1	1	0	0	3	9	1	0	1	7	1	1	0	0	1	1	1	1
OG0001677	1	1	3	1	2	1	1	1	0	1	1	4	1	3	2	1	3	2
OG0001678	1	2	1	0	3	2	1	1	1	1	1	6	2	2	2	1	1	1
OG0001679	2	1	1	1	4	1	4	1	1	1	2	1	1	3	1	2	1	1
OG0001680	1	1	1	1	2	3	1	1	1	2	1	5	1	3	1	1	2	1
OG0001681	1	1	2	1	3	3	1	2	1	3	2	2	1	1	2	1	1	1
OG0001682	1	1	2	1	2	2	2	1	1	1	2	3	1	2	2	1	3	1
OG0001683	1	1	2	2	2	1	1	1	1	1	2	1	1	10	1	0	0	1
OG0001684	1	1	1	2	2	4	1	2	2	2	1	2	2	1	1	1	1	2
OG0001685	1	5	1	1	1	1	2	2	1	1	1	1	2	3	1	1	3	1
OG0001686	1	1	1	0	3	4	1	1	1	2	3	3	1	2	1	2	1	1
OG0001687	1	1	1	1	5	3	1	1	1	2	1	5	0	2	1	1	1	1
OG0001688	1	1	1	2	1	5	0	1	1	3	2	3	2	1	1	1	2	1
OG0001689	2	1	1	1	1	5	1	1	1	3	1	2	1	2	1	1	3	1
OG0001690	1	1	2	2	3	1	1	2	1	1	2	1	2	1	2	2	2	2
OG0001691	1	1	2	1	2	3	1	2	1	2	2	4	1	1	2	1	1	1
OG0001692	1	1	1	1	5	1	2	2	1	1	3	1	1	1	1	1	1	4
OG0001693	1	1	2	1	3	5	1	1	1	2	1	3	3	1	1	1	0	1
OG0001694	1	1	1	1	5	1	2	1	1	1	4	2	1	1	1	1	3	1
OG0001695	1	1	1	1	1	4	1	1	4	4	1	4	1	1	1	1	0	1
OG0001696	1	1	1	2	4	3	1	1	1	2	1	4	1	1	1	2	1	1
OG0001697	2	1	1	1	3	4	1	1	1	2	1	2	2	2	1	1	1	2
OG0001698	1	1	2	3	5	3	1	1	1	2	2	1	1	1	1	1	1	1
OG0001699	1	1	2	1	2	1	0	0	0	0	1	4	0	3	2	1	9	1
OG0001700	1	1	1	1	1	2	1	2	1	3	1	8	1	2	1	1	1	0
OG0001701	1	1	1	3	1	1	2	2	1	1	1	2	2	1	1	0	5	3
OG0001702	2	1	1	2	2	1	1	3	1	1	1	3	1	3	1	1	3	1
OG0001703	1	1	1	1	3	3	1	1	1	3	2	1	1	2	1	1	1	4
OG0001704	1	2	2	4	1	2	1	2	2	1	1	1	1	2	2	1	2	1
OG0001705	1	1	1	2	3	2	1	1	1	2	1	5	1	3	1	1	1	1
OG0001706	1	1	1	1	5	2	1	1	1	3	3	1	1	2	1	1	1	2
OG0001707	1	1	2	1	1	4	1	2	1	3	1	3	1	1	1	1	1	3
OG0001708	1	1	1	1	3	2	2	2	1	2	2	3	2	1	1	1	2	1
OG0001709	1	1	2	1	5	1	1	1	1	1	2	1	2	5	1	1	1	1
OG0001710	1	1	1	1	1	7	1	1	1	4	1	3	1	1	1	1	1	1
OG0001711	1	1	1	1	3	3	2	1	1	2	2	1	1	1	1	2	3	2
OG0001712	1	1	1	1	2	2	1	1	1	3	1	2	2	5	1	1	2	1
OG0001713	1	1	1	2	1	5	1	0	1	3	1	2	1	3	1	1	2	2
OG0001714	1	1	1	1	2	3	2	0	1	2	1	5	2	3	1	1	1	1
OG0001715	1	2	3	2	2	2	1	1	1	2	3	1	1	2	2	1	1	1
OG0001716	1	1	2	0	2	1	3	1	1	2	2	5	1	1	1	1	2	2
OG0001717	1	2	1	1	2	4	0	1	1	4	1	4	2	1	1	1	1	1
OG0001718	1	2	1	1	1	1	1	1	3	1	1	1	1	1	1	8	2	1
OG0001719	1	1	2	1	5	3	1	1	1	2	1	2	1	2	2	1	1	1
OG0001720	1	1	1	1	2	3	0	2	2	2	4	1	0	2	1	2	3	1
OG0001721	1	1	2	1	2	4	2	1	1	2	1	4	1	1	2	1	1	1
OG0001722	1	1	1	2	1	3	1	1	2	2	1	4	2	3	1	1	1	1
OG0001723	1	1	2	1	7	1	2	1	1	1	1	3	1	1	2	1	1	1
OG0001724	1	2	1	1	1	2	1	2	5	2	1	2	1	1	1	2	1	2
OG0001725	1	2	1	1	4	3	1	2	1	2	1	3	1	2	1	1	1	1
OG0001726	1	1	1	1	1	4	1	1	1	5	1	3	3	1	1	1	1	1
OG0001727	1	1	2	0	4	4	1	1	1	3	1	4	1	1	1	1	1	1
OG0001728	1	1	1	1	3	2	2	1	1	1	2	3	3	1	1	1	2	2
OG0001729	1	1	1	1	3	3	1	1	1	2	3	3	2	1	1	2	1	1
OG0001730	1	1	1	1	2	4	1	1	1	4	1	3	1	2	1	1	2	1
OG0001731	1	1	2	1	6	1	3	1	1	1	2	1	1	3	1	1	1	1
OG0001732	1	1	1	1	1	3	1	2	1	3	1	2	3	1	1	1	3	2
OG0001733	1	1	1	1	2	2	1	1	1	2	1	6	1	3	1	1	2	1
OG0001734	1	1	1	1	3	5	0	1	1	3	1	5	1	1	1	1	1	1
OG0001735	1	1	1	1	1	3	3	1	1	2	1	5	0	2	1	3	1	1
OG0001736	1	1	3	1	2	4	1	1	1	2	3	3	1	1	1	1	1	1
OG0001737	1	1	1	1	3	2	2	1	1	2	1	4	1	3	1	1	2	1
OG0001738	1	1	1	2	1	3	1	1	1	3	1	4	1	4	1	1	1	1
OG0001739	1	1	1	1	3	5	1	1	1	2	2	3	1	2	1	1	1	1
OG0001740	1	1	1	1	4	1	1	1	2	5	1	2	1	2	1	1	1	2
OG0001741	1	1	1	1	2	6	0	1	1	4	1	4	1	1	1	1	1	1
OG0001742	1	1	2	2	1	3	3	2	2	3	1	2	1	1	1	1	1	1
OG0001743	1	1	2	1	2	3	1	1	2	3	2	4	1	1	1	1	1	1
OG0001744	1	1	1	1	5	3	1	1	2	3	2	1	1	2	1	1	1	1
OG0001745	1	1	2	1	1	3	2	1	1	2	1	5	2	2	1	1	1	1
OG0001746	1	1	1	1	2	5	1	1	1	4	1	2	1	2	1	1	1	2
OG0001747	1	1	2	1	2	6	1	1	1	3	1	2	1	2	1	1	1	1
OG0001748	1	1	1	1	4	2	2	1	1	2	1	2	2	2	3	1	1	1
OG0001749	1	1	1	1	1	6	1	1	1	3	1	5	1	1	1	1	1	1
OG0001750	1	1	1	1	2	3	4	1	2	2	3	2	1	1	1	1	1	1
OG0001751	2	1	1	1	3	3	2	2	1	2	2	3	1	1	1	1	1	1
OG0001752	1	1	2	1	3	2	1	1	1	3	1	4	1	2	1	1	2	1
OG0001753	0	2	1	0	1	6	1	2	3	5	1	1	0	1	1	1	1	2
OG0001754	0	1	1	1	1	5	1	1	1	4	1	6	1	1	1	1	1	1
OG0001755	0	4	2	1	1	0	0	0	5	0	1	2	0	5	2	1	0	5
OG0001756	0	2	1	0	2	3	1	0	1	3	2	3	2	3	1	2	0	3
OG0001757	0	1	2	0	3	4	2	1	1	3	2	1	1	2	2	2	1	1
OG0001758	0	2	1	1	4	2	1	0	2	2	1	3	1	2	3	2	0	2
OG0001759	0	1	2	2	3	2	1	1	1	3	1	4	0	2	1	3	0	2
OG0001761	0	2	2	0	4	2	1	0	2	1	1	3	1	5	1	1	0	3
OG0001762	0	5	2	0	1	2	2	0	4	2	1	0	2	2	1	3	0	2
OG0001764	0	1	1	11	1	0	0	1	1	0	1	3	1	3	1	2	1	1
OG0001765	0	2	2	0	2	3	1	0	3	2	0	3	0	3	4	2	0	2
OG0001766	0	1	0	0	2	10	0	0	1	6	1	3	1	1	0	2	0	1
OG0001767	0	1	0	1	2	3	2	0	1	2	1	8	3	1	1	1	1	1
OG0001768	0	1	2	0	2	7	1	0	1	4	1	4	0	3	1	1	0	1
OG0001769	0	1	0	0	4	4	3	1	1	3	2	1	1	4	1	1	1	1
OG0001770	0	1	2	0	2	2	2	1	2	2	1	4	1	3	2	1	1	2
OG0001771	0	1	5	1	3	3	1	0	2	3	1	1	1	1	2	2	0	2
OG0001772	0	1	2	1	1	4	0	1	1	4	1	5	1	2	1	1	1	2
OG0001773	0	1	1	3	1	2	1	1	2	2	1	3	2	2	2	1	2	2
OG0001774	0	2	0	1	6	2	1	4	1	2	1	2	0	2	1	1	1	2
OG0001776	0	0	1	0	0	1	0	1	1	7	1	9	0	2	1	3	2	0
OG0001778	0	0	2	1	3	1	1	1	2	1	2	6	2	2	2	1	1	1
OG0001786	2	1	1	1	2	3	1	2	1	3	2	2	2	1	1	1	1	1
OG0001787	2	2	1	1	3	0	1	3	1	0	1	4	1	4	1	1	1	1
OG0001788	1	1	1	0	2	1	1	3	5	1	1	2	1	3	1	1	2	1
OG0001789	1	1	2	1	3	4	2	1	1	3	1	2	1	1	1	1	1	1
OG0001790	1	1	1	1	6	2	1	1	1	3	1	3	1	1	1	1	1	1
OG0001791	2	1	1	1	5	1	1	1	1	1	3	1	2	3	1	1	1	1
OG0001792	2	2	1	1	2	5	1	1	2	3	1	1	1	1	1	1	1	1
OG0001793	1	1	1	2	4	2	1	1	1	1	1	2	2	3	1	1	2	1
OG0001794	1	1	0	1	3	2	2	3	1	2	1	1	1	2	1	1	3	2
OG0001795	1	1	1	1	4	3	1	2	1	3	2	1	1	1	1	1	1	2
OG0001796	1	1	1	0	2	3	1	3	2	2	1	3	0	1	2	2	1	2
OG0001797	1	1	1	1	2	3	2	1	1	2	1	4	1	2	1	1	2	1
OG0001798	1	1	1	1	3	4	1	2	1	3	2	1	2	1	1	1	1	1
OG0001799	2	1	2	2	1	3	2	0	1	2	1	4	1	2	1	1	1	1
OG0001800	1	1	1	1	1	4	1	1	1	2	1	5	1	2	1	1	2	1
OG0001801	2	1	2	1	2	5	1	1	1	3	1	3	1	1	1	0	1	1
OG0001802	1	1	1	1	3	6	1	1	1	4	1	1	1	1	1	1	1	1
OG0001803	1	1	7	1	2	2	1	1	1	2	1	1	1	1	1	1	2	1
OG0001804	1	1	1	0	3	4	1	1	1	3	1	2	1	2	2	1	2	1
OG0001805	1	1	1	1	1	5	1	1	1	5	1	2	1	1	1	1	2	1
OG0001806	1	1	2	1	2	3	4	1	1	2	1	3	1	1	1	1	1	1
OG0001807	1	1	1	0	1	8	1	1	1	5	1	1	1	1	1	1	1	1
OG0001808	1	1	2	0	4	5	1	1	1	3	1	1	2	1	1	1	1	1
OG0001809	1	1	1	2	2	3	1	1	1	2	1	3	1	4	1	1	1	1
OG0001810	2	2	1	1	1	2	1	1	1	4	2	4	1	1	1	1	1	1
OG0001811	1	1	1	1	2	6	1	2	1	3	1	2	1	2	1	0	1	1
OG0001812	2	3	1	1	1	1	2	1	1	0	1	6	4	1	0	1	1	1
OG0001813	1	1	1	1	2	1	2	1	1	1	2	2	4	2	1	1	2	2
OG0001814	1	1	2	1	1	4	1	0	1	2	0	4	1	4	2	1	1	1
OG0001815	1	1	1	1	2	5	1	1	1	3	1	3	1	2	1	1	1	1
OG0001816	1	1	1	1	4	2	2	1	1	2	1	4	1	2	1	1	1	1
OG0001817	1	1	0	0	3	4	0	1	1	3	2	6	1	1	1	1	1	1
OG0001818	1	1	1	2	1	4	1	0	1	5	1	3	1	1	1	1	1	2
OG0001819	1	1	1	1	1	4	1	1	1	2	2	4	1	1	2	2	1	1
OG0001820	1	1	1	0	1	6	1	1	1	2	1	6	0	3	1	1	0	1
OG0001821	1	1	1	1	1	5	1	1	1	3	1	5	1	1	1	1	1	1
OG0001822	1	1	1	1	3	1	5	1	1	1	1	1	1	1	1	5	1	1
OG0001823	1	1	9	1	1	2	1	1	1	1	2	1	2	1	1	1	0	1
OG0001824	2	1	0	1	2	4	1	1	1	2	1	3	2	2	1	1	2	1
OG0001825	1	1	1	1	2	1	1	1	4	1	1	1	3	1	1	1	5	1
OG0001826	1	1	1	1	2	4	1	1	1	4	1	2	1	2	2	2	0	1
OG0001827	1	1	2	1	2	4	3	0	1	2	1	1	1	2	2	1	1	2
OG0001828	2	1	1	1	2	6	0	1	1	3	1	3	1	1	1	1	1	1
OG0001829	1	1	3	1	2	2	2	1	2	1	2	3	1	1	1	1	2	1
OG0001830	1	1	2	1	4	2	3	1	1	2	1	2	2	1	1	1	1	1
OG0001831	1	1	1	1	2	2	1	1	1	1	1	1	1	2	1	7	2	1
OG0001832	1	1	3	1	2	3	1	1	1	2	1	5	1	1	1	1	1	1
OG0001833	1	1	0	0	4	5	1	1	1	4	1	4	1	1	1	1	0	1
OG0001834	1	0	1	1	4	1	0	1	2	1	5	2	1	4	1	1	2	0
OG0001835	1	1	2	2	2	1	5	1	1	3	1	0	1	1	1	2	1	2
OG0001836	1	1	2	0	1	1	2	1	2	4	1	5	1	1	1	1	1	2
OG0001837	1	1	2	2	1	2	2	1	2	2	1	4	1	1	1	1	2	1
OG0001838	1	1	2	1	1	3	4	1	1	2	0	3	1	3	1	1	1	1
OG0001839	1	1	3	1	5	3	1	1	1	2	1	1	1	1	2	1	1	1
OG0001840	1	1	1	1	3	5	1	1	1	3	1	3	0	2	1	1	1	1
OG0001841	1	1	1	1	3	1	8	1	1	1	1	2	1	1	1	1	1	1
OG0001842	1	1	1	2	2	4	1	1	1	2	0	3	2	2	1	1	2	1
OG0001843	1	0	1	1	6	5	1	0	0	2	1	4	0	2	1	0	2	1
OG0001844	1	1	3	1	2	2	2	1	1	2	1	5	1	2	1	1	0	1
OG0001845	1	1	1	1	1	5	0	1	2	3	3	2	1	1	1	1	1	2
OG0001846	1	1	1	2	3	2	1	0	1	3	1	4	3	1	1	1	1	1
OG0001847	1	2	1	1	2	4	1	0	2	2	0	5	1	2	1	1	1	1
OG0001848	1	1	1	0	2	6	1	1	1	3	1	3	1	2	1	1	1	1
OG0001849	1	2	1	2	2	4	2	2	1	2	2	2	1	1	1	0	1	1
OG0001850	2	2	1	1	3	4	1	0	1	3	1	2	2	1	1	1	1	1
OG0001851	1	1	1	0	5	1	1	0	1	0	2	5	0	4	1	2	1	2
OG0001852	1	1	2	1	3	3	0	1	1	2	1	4	1	4	0	1	1	1
OG0001853	2	1	1	1	4	3	1	2	1	2	1	1	2	1	1	1	2	1
OG0001854	1	1	2	1	6	1	1	1	1	0	1	4	1	2	2	1	1	1
OG0001855	1	2	1	0	5	0	4	1	1	0	2	3	0	1	2	2	1	2
OG0001856	1	1	1	1	1	2	3	1	1	1	2	2	2	2	1	1	3	2
OG0001857	1	1	3	1	5	2	1	1	1	2	1	3	1	1	1	1	1	1
OG0001858	1	1	1	1	2	4	1	1	1	3	1	2	2	2	1	2	1	1
OG0001859	1	1	2	1	3	4	3	1	1	2	1	1	1	2	1	1	1	1
OG0001860	1	2	1	0	3	3	1	1	1	2	1	3	1	3	1	1	1	2
OG0001861	1	1	1	1	3	2	1	1	1	1	1	2	3	2	1	1	3	2
OG0001862	1	1	1	0	2	3	2	0	1	4	1	4	1	2	1	3	0	1
OG0001863	1	2	1	2	2	2	1	1	2	2	1	2	2	2	1	2	1	1
OG0001864	1	1	1	2	2	4	1	1	2	2	1	3	1	1	1	2	1	1
OG0001865	1	2	1	2	2	2	1	1	2	1	1	1	1	3	1	1	1	4
OG0001866	1	1	1	1	4	4	1	1	1	3	1	2	1	1	1	1	2	1
OG0001867	1	2	1	0	2	3	1	1	1	3	1	2	3	3	1	1	1	1
OG0001868	1	1	1	1	3	3	1	1	1	2	1	4	1	2	1	1	2	1
OG0001869	1	1	1	2	3	5	1	1	1	4	1	1	1	1	1	1	1	1
OG0001870	1	2	3	0	4	0	1	1	1	0	1	5	1	0	3	3	1	1
OG0001871	1	1	1	2	1	4	2	1	1	3	1	2	1	1	1	1	3	1
OG0001872	1	1	1	2	3	6	1	1	1	3	0	2	1	1	1	1	1	1
OG0001873	1	1	2	1	1	4	1	1	1	4	1	3	1	1	2	1	1	1
OG0001874	1	4	1	0	2	0	1	0	1	0	3	3	2	1	2	1	5	1
OG0001875	1	1	1	1	5	2	1	1	1	2	1	2	2	2	1	1	1	2
OG0001876	1	1	1	1	5	1	1	0	1	1	0	1	1	1	1	1	9	1
OG0001877	1	1	1	1	8	1	1	2	1	2	2	1	0	3	1	1	0	1
OG0001878	1	1	0	1	6	1	2	1	1	1	2	5	0	2	2	0	1	1
OG0001879	0	1	1	0	3	0	1	1	1	0	3	4	2	6	1	1	2	1
OG0001881	0	2	1	1	1	5	1	1	2	3	1	4	1	1	1	1	1	1
OG0001882	0	2	1	1	3	3	2	1	2	2	3	2	1	2	0	1	0	2
OG0001883	0	1	2	0	5	2	2	1	1	1	2	2	1	2	2	1	2	1
OG0001885	0	6	5	2	3	1	0	0	1	0	4	0	1	0	3	0	0	2
OG0001887	0	1	2	1	3	3	1	1	1	2	2	4	1	2	1	1	1	1
OG0001888	0	1	1	1	2	2	1	6	1	2	1	4	1	1	1	1	1	1
OG0001890	0	1	0	2	2	6	1	1	1	4	1	3	0	1	0	2	2	1
OG0001891	0	1	0	0	4	3	2	1	1	2	1	7	0	2	1	1	1	1
OG0001892	0	2	0	0	2	3	1	1	2	3	2	2	1	3	1	2	1	2
OG0001893	0	2	2	0	2	3	1	0	2	2	0	5	1	1	2	3	0	2
OG0001894	0	1	3	1	5	1	1	1	1	1	2	2	1	3	1	2	1	1
OG0001896	0	2	2	1	2	3	1	2	3	3	1	2	1	1	0	0	0	4
OG0001897	0	5	1	1	1	1	2	0	1	1	1	1	8	1	1	1	1	1
OG0001898	0	1	4	1	4	2	1	2	1	1	2	1	1	3	1	1	1	1
OG0001901	0	2	2	0	1	3	0	0	3	2	2	0	1	5	0	1	2	4
OG0001902	0	1	1	1	6	2	1	1	1	2	1	3	1	3	1	1	1	1
OG0001903	0	2	3	1	3	0	1	0	1	0	3	5	1	3	3	1	0	1
OG0001904	0	1	2	0	2	3	1	0	1	3	1	5	3	2	1	1	1	1
OG0001905	0	1	2	0	2	3	2	1	1	2	2	5	2	1	2	0	1	1
OG0001906	0	2	1	0	1	4	1	0	1	5	1	5	0	2	2	2	0	1
OG0001907	0	0	1	0	2	7	1	0	0	4	1	6	1	1	1	2	0	1
OG0001908	0	0	0	1	5	3	2	0	0	0	3	2	2	2	1	1	6	0
OG0001909	0	0	0	4	3	0	2	0	1	0	4	4	5	3	0	1	0	1
OG0001915	1	2	2	0	1	1	0	1	5	1	3	1	4	2	1	1	0	1
OG0001916	1	1	0	1	2	2	2	1	3	1	1	2	1	1	1	1	5	1
OG0001917	1	1	1	4	1	5	1	0	1	4	1	1	1	1	1	1	1	1
OG0001918	2	1	1	1	2	4	0	1	1	3	1	2	2	1	1	1	2	1
OG0001919	3	1	2	2	2	1	1	1	1	1	1	1	3	2	1	1	2	1
OG0001920	1	1	1	1	3	1	1	1	1	1	3	2	1	2	1	1	4	1
OG0001921	1	1	1	1	2	5	1	0	1	3	1	2	2	2	1	1	1	1
OG0001922	2	1	1	0	2	3	1	3	1	3	1	2	1	2	0	1	2	1
OG0001923	1	1	1	1	4	2	3	1	1	2	2	3	1	1	1	1	0	1
OG0001924	1	1	0	3	3	3	4	1	1	2	1	2	0	1	1	1	1	1
OG0001925	1	2	2	2	3	1	2	1	1	2	1	1	1	3	1	1	1	1
OG0001926	1	1	1	1	1	2	6	1	2	1	2	1	1	1	2	1	1	1
OG0001927	1	1	1	1	3	1	1	1	1	1	4	2	2	1	1	1	1	3
OG0001928	2	1	1	1	2	1	1	1	4	1	1	3	1	1	2	2	1	1
OG0001929	2	1	1	1	2	2	1	2	2	2	1	2	1	2	1	0	3	1
OG0001930	1	1	1	1	3	3	1	1	1	3	1	1	1	1	1	1	4	1
OG0001931	1	1	1	1	2	2	1	1	1	2	1	3	2	3	1	1	1	2
OG0001932	2	1	1	2	2	2	1	1	1	2	1	2	1	1	1	1	4	1
OG0001933	1	1	3	1	1	2	1	1	1	2	1	4	1	3	1	1	1	1
OG0001934	1	1	2	0	2	2	2	1	2	3	1	3	2	1	1	1	1	1
OG0001935	2	1	1	1	1	3	2	1	1	2	1	5	1	1	1	1	1	1
OG0001936	2	1	1	1	2	3	1	1	1	3	1	2	2	2	1	1	1	1
OG0001937	1	1	2	1	3	2	1	1	1	3	1	2	1	2	1	2	1	1
OG0001938	1	1	1	1	1	5	1	1	1	3	1	4	1	1	1	1	1	1
OG0001939	2	1	1	1	2	2	1	1	1	1	1	2	2	2	1	1	4	1
OG0001940	2	1	1	1	2	2	1	1	1	2	2	2	1	2	1	2	2	1
OG0001941	1	1	1	1	1	3	1	1	2	3	1	3	0	2	1	3	1	1
OG0001942	1	1	1	1	2	2	3	1	2	1	2	1	1	2	2	1	2	1
OG0001943	1	1	1	1	5	2	1	1	1	1	1	3	1	1	1	3	1	1
OG0001944	1	1	0	0	2	2	1	1	1	1	3	2	2	4	1	1	3	1
OG0001945	1	1	2	1	2	1	1	1	0	2	1	2	1	2	2	1	4	2
OG0001946	1	2	1	2	1	1	2	3	1	1	1	1	5	1	1	1	1	1
OG0001947	1	2	1	0	3	3	1	1	1	2	1	2	2	3	1	1	1	1
OG0001948	1	2	1	2	1	3	1	1	1	2	1	3	3	1	1	1	1	1
OG0001949	1	1	3	1	4	1	1	1	1	1	2	2	1	2	1	1	2	1
OG0001950	1	1	1	1	4	2	2	1	1	1	2	2	1	1	1	2	1	2
OG0001951	1	2	3	1	6	1	1	1	1	1	1	2	1	1	1	1	0	2
OG0001952	1	1	1	1	4	2	1	2	1	2	2	2	1	1	1	1	1	2
OG0001953	1	1	2	3	2	2	1	2	1	2	1	3	1	1	1	1	1	1
OG0001954	1	1	2	1	6	1	1	1	1	2	2	1	1	2	1	1	1	1
OG0001955	1	1	1	1	1	4	1	2	1	2	1	5	1	1	1	1	1	1
OG0001956	1	1	1	1	3	1	1	1	1	1	1	5	1	3	1	1	2	1
OG0001957	1	1	2	1	3	3	1	1	1	3	1	3	1	1	1	1	1	1
OG0001958	1	0	1	0	1	5	1	1	1	3	1	4	1	2	1	1	2	1
OG0001959	1	1	2	0	4	2	1	1	1	3	1	5	1	1	1	1	0	1
OG0001960	1	2	2	1	2	3	2	1	1	3	1	1	1	2	1	0	1	2
OG0001961	1	1	1	0	1	8	0	1	1	5	1	2	1	0	1	1	1	1
OG0001962	1	2	1	1	3	0	2	1	1	0	1	4	1	4	2	1	1	1
OG0001963	1	2	1	1	2	2	1	2	2	2	1	2	1	1	2	1	1	2
OG0001964	1	1	1	0	2	4	0	0	1	3	1	6	0	1	1	2	2	1
OG0001965	1	1	1	1	1	1	1	2	1	2	1	2	1	5	1	1	3	1
OG0001966	1	2	2	1	1	2	2	1	2	2	1	2	1	2	1	2	1	1
OG0001967	1	1	1	1	2	4	1	1	1	4	1	2	1	2	1	1	1	1
OG0001968	3	1	1	1	1	2	1	0	2	2	1	4	2	2	1	1	1	1
OG0001969	1	1	1	3	2	1	1	1	1	1	1	7	1	1	1	1	1	1
OG0001970	1	1	1	0	1	3	6	1	1	3	1	1	1	1	1	1	2	1
OG0001971	1	2	1	0	2	2	1	2	1	3	2	2	1	1	1	2	1	2
OG0001972	1	1	2	1	2	3	1	1	1	2	1	4	1	2	1	1	1	1
OG0001973	1	1	2	3	1	1	0	1	2	1	6	1	1	2	1	1	1	1
OG0001974	1	1	1	0	1	4	1	1	1	2	1	6	1	2	1	1	1	1
OG0001975	2	2	2	0	3	0	0	1	2	0	2	2	3	2	1	1	2	2
OG0001976	1	2	1	2	4	2	1	1	1	2	1	4	1	1	1	1	0	1
OG0001977	1	1	2	1	2	1	2	1	1	1	2	1	1	2	2	2	2	2
OG0001978	1	2	1	1	1	3	1	1	1	3	1	4	1	1	1	1	2	1
OG0001979	1	2	1	1	4	2	1	2	1	1	2	3	2	1	1	1	0	1
OG0001980	1	1	1	1	2	0	1	1	1	0	1	6	1	2	1	1	4	2
OG0001981	1	1	1	3	2	0	2	1	1	0	1	5	2	2	2	1	1	1
OG0001982	1	1	1	1	2	4	1	1	1	4	1	2	1	2	1	1	1	1
OG0001983	1	1	2	1	5	1	1	1	1	1	2	1	2	3	1	1	1	1
OG0001984	1	1	2	3	2	1	1	1	1	2	1	4	1	2	1	1	1	1
OG0001985	1	1	1	1	1	3	1	1	2	3	2	1	2	2	1	1	1	2
OG0001986	1	1	1	1	2	4	1	2	1	3	1	2	1	2	1	1	1	1
OG0001987	1	2	1	1	2	2	1	1	2	2	1	4	1	1	1	1	1	2
OG0001988	1	2	2	1	1	2	1	1	2	2	2	2	1	2	1	1	1	2
OG0001989	2	2	5	0	1	1	2	1	1	1	1	1	1	1	1	3	2	1
OG0001990	1	1	1	1	4	3	1	2	1	3	1	2	1	1	1	1	1	1
OG0001991	2	2	2	3	1	0	1	2	1	0	1	6	1	1	1	1	1	1
OG0001992	1	2	1	0	2	2	1	1	2	2	1	3	1	2	1	1	2	2
OG0001993	1	1	1	1	2	1	1	1	1	1	1	3	1	6	1	2	1	1
OG0001994	1	1	2	2	3	1	2	1	1	1	1	3	2	1	1	1	2	1
OG0001995	1	1	1	1	2	2	1	3	1	2	2	2	3	1	1	1	1	1
OG0001996	1	0	1	3	2	2	3	2	0	3	1	2	1	2	0	1	1	2
OG0001997	1	2	1	1	2	1	3	1	1	1	1	2	1	1	1	5	1	1
OG0001998	1	1	1	0	3	3	2	2	0	2	1	4	2	2	0	1	1	1
OG0001999	1	1	1	0	2	3	2	1	1	3	1	5	1	1	1	1	1	1
OG0002000	1	1	1	1	3	3	2	1	1	2	2	2	1	2	1	1	1	1
OG0002001	1	1	1	1	3	3	1	1	1	2	1	2	1	1	1	3	2	1
OG0002002	1	1	3	1	5	1	1	1	1	1	1	1	1	2	1	1	3	1
OG0002003	1	1	1	1	4	3	1	2	3	2	1	1	1	1	1	1	1	1
OG0002004	1	1	2	1	2	1	1	2	1	1	1	1	1	4	1	3	2	1
OG0002005	1	1	2	0	3	3	1	1	2	2	1	1	2	2	2	1	1	1
OG0002006	1	1	1	1	3	3	1	1	1	1	1	3	2	2	1	1	2	1
OG0002007	1	1	1	1	2	3	1	2	1	2	1	3	1	3	1	1	1	1
OG0002008	1	2	1	1	2	2	1	1	3	1	1	2	2	2	1	1	1	2
OG0002009	1	1	1	4	2	2	1	1	2	1	1	3	1	1	1	1	1	2
OG0002010	1	1	1	1	2	3	1	1	1	3	2	1	2	1	1	2	2	1
OG0002011	1	1	2	2	3	2	2	0	1	2	3	2	1	1	1	1	1	1
OG0002012	1	1	2	1	1	2	1	1	2	3	0	2	3	2	1	1	2	1
OG0002013	1	1	1	1	3	2	6	1	1	1	1	1	1	1	1	1	2	1
OG0002014	1	1	1	1	2	2	1	1	3	2	1	2	3	2	1	1	1	1
OG0002015	1	1	1	1	2	6	1	0	1	4	1	2	1	1	1	1	1	1
OG0002016	1	1	0	2	1	2	1	1	2	3	2	2	3	2	1	1	1	1
OG0002017	1	1	1	1	4	1	2	1	1	1	3	1	1	2	1	1	3	1
OG0002018	0	1	1	1	3	4	1	1	1	2	1	4	1	1	1	2	1	1
OG0002019	0	2	3	1	4	1	1	1	2	1	1	5	1	1	1	0	1	1
OG0002020	0	1	1	1	3	3	1	1	1	3	2	2	1	2	1	1	1	2
OG0002021	0	1	1	1	2	2	1	2	1	1	2	5	1	2	1	1	2	1
OG0002022	0	2	2	1	0	2	2	1	3	3	1	1	1	0	2	2	1	3
OG0002023	0	1	1	4	1	4	3	0	1	3	2	1	2	1	1	1	0	1
OG0002024	0	1	2	6	4	2	1	0	1	2	1	2	1	1	0	1	1	1
OG0002025	0	1	2	2	1	4	1	0	1	3	1	4	0	1	2	2	0	2
OG0002026	0	2	1	1	3	2	2	1	2	3	1	2	1	2	1	1	1	1
OG0002027	0	1	1	0	1	4	1	1	1	3	1	5	2	2	1	1	1	1
OG0002028	0	2	3	1	1	2	0	0	2	2	2	2	0	3	2	3	0	2
OG0002030	0	1	1	1	4	3	4	1	1	3	2	2	0	1	1	0	1	1
OG0002031	0	1	1	0	2	9	0	0	1	1	2	2	1	2	1	3	0	1
OG0002032	0	1	1	1	4	5	3	0	1	3	2	1	1	1	1	1	0	1
OG0002033	0	2	1	1	2	1	1	1	1	6	0	2	1	3	1	1	2	1
OG0002034	0	2	2	1	4	1	3	1	2	1	2	2	1	1	1	2	0	1
OG0002035	0	1	0	1	4	4	1	0	1	7	2	0	1	1	2	1	0	1
OG0002036	0	1	1	0	2	2	4	0	0	2	1	5	1	4	1	2	0	1
OG0002037	0	2	1	0	1	2	1	1	2	3	1	6	1	2	1	1	1	1
OG0002039	0	1	2	1	1	3	2	1	1	1	2	5	1	1	1	2	1	1
OG0002040	0	1	2	1	3	4	3	1	1	3	1	1	1	1	1	1	1	1
OG0002041	0	2	2	0	2	0	3	1	1	0	1	6	1	3	1	1	1	2
OG0002042	0	4	3	0	1	2	1	0	3	3	1	1	1	0	0	5	0	2
OG0002043	0	1	0	1	2	1	1	1	9	1	0	2	1	2	1	2	1	1
OG0002044	0	1	1	1	1	7	0	1	1	3	1	3	0	1	1	1	2	2
OG0002045	0	1	1	0	1	3	1	0	1	2	12	2	0	1	1	0	0	1
OG0002046	0	1	1	1	3	4	1	1	1	2	1	3	1	2	1	2	1	1
OG0002047	0	1	2	0	2	1	4	0	2	1	1	6	1	2	1	1	1	1
OG0002048	0	1	1	1	5	3	1	1	1	3	1	3	1	1	1	1	1	1
OG0002049	0	1	2	2	3	2	4	3	2	2	1	2	0	0	1	1	0	1
OG0002051	0	1	1	1	3	3	1	1	4	2	1	2	1	2	1	1	1	1
OG0002053	0	1	3	0	6	0	3	0	0	0	1	2	1	2	2	1	4	1
OG0002056	0	0	0	1	1	11	1	0	0	5	3	1	0	1	1	1	0	1
OG0002063	0	0	0	0	3	4	2	2	0	2	1	8	0	3	0	1	0	1
OG0002064	0	0	0	0	1	7	1	1	0	5	1	4	3	1	0	3	0	0
OG0002065	1	1	1	1	1	1	1	1	2	1	1	1	1	4	1	3	3	1
OG0002066	1	2	1	1	1	3	1	1	3	2	2	3	1	1	0	1	1	1
OG0002067	2	1	1	0	1	3	1	1	1	2	1	2	1	2	3	1	2	1
OG0002068	1	1	1	1	2	3	1	1	1	2	1	5	1	0	2	1	1	1
OG0002069	1	1	1	1	1	2	2	1	1	2	2	2	1	2	1	3	1	1
OG0002070	1	1	1	1	2	2	1	1	1	2	1	2	1	1	1	1	5	1
OG0002071	1	1	1	1	2	5	1	1	1	2	1	2	1	2	1	1	1	1
OG0002072	5	1	1	1	0	1	1	7	1	1	0	1	1	1	1	0	2	1
OG0002073	1	1	1	3	2	3	1	1	2	3	1	2	1	1	1	1	0	1
OG0002074	1	1	1	1	2	5	1	1	1	3	1	2	1	1	1	1	1	1
OG0002075	1	1	1	1	2	3	1	1	2	2	1	2	1	2	1	1	1	2
OG0002076	2	2	2	1	2	1	2	1	1	0	3	1	1	3	1	1	0	2
OG0002077	1	1	1	2	4	2	1	1	1	4	1	1	1	1	1	1	1	1
OG0002078	1	1	2	1	2	0	2	1	1	0	1	5	1	3	1	1	1	2
OG0002079	1	1	1	1	2	1	1	1	1	1	3	3	1	2	1	3	1	1
OG0002080	1	1	1	1	3	1	2	2	1	1	2	2	1	1	1	2	1	2
OG0002081	1	0	1	8	2	1	1	1	1	1	1	1	1	1	1	1	2	1
OG0002082	1	1	1	2	3	3	1	1	1	2	1	1	2	2	1	1	1	1
OG0002083	1	1	1	1	3	2	2	1	1	2	1	3	1	2	1	1	1	1
OG0002084	1	1	2	1	1	6	1	1	1	3	1	2	1	0	1	1	1	1
OG0002085	2	1	1	1	3	2	1	3	1	2	1	1	1	1	1	2	1	1
OG0002086	1	1	1	1	4	3	1	1	1	3	1	1	1	2	1	1	1	1
OG0002087	1	1	1	1	3	2	1	1	1	2	1	4	2	1	1	1	1	1
OG0002088	1	1	1	1	1	3	1	1	1	2	1	2	1	2	1	0	5	1
OG0002089	1	1	2	2	3	3	1	1	1	2	2	1	1	1	1	1	1	1
OG0002090	1	2	1	0	3	1	1	2	2	2	1	2	1	1	2	1	1	2
OG0002091	1	1	1	1	2	3	1	1	1	4	1	3	1	1	1	1	1	1
OG0002092	1	2	1	1	3	3	1	1	1	2	0	4	0	1	1	1	1	2
OG0002093	1	2	1	1	6	2	1	1	1	1	1	2	1	1	1	1	1	1
OG0002094	1	1	1	1	5	3	1	1	1	2	1	1	1	2	1	1	1	1
OG0002095	1	1	0	2	3	2	1	3	1	2	1	1	1	2	2	1	1	1
OG0002096	2	2	2	1	2	3	1	1	1	4	2	1	1	1	1	1	0	0
OG0002097	1	1	1	2	3	1	3	2	1	1	1	1	1	3	1	1	1	1
OG0002098	1	1	1	1	2	2	1	2	1	2	1	3	1	3	1	1	1	1
OG0002099	1	1	1	2	2	3	1	1	1	3	1	2	1	1	1	2	1	1
OG0002100	1	1	2	1	1	2	1	1	1	3	1	3	1	1	1	1	2	2
OG0002101	1	2	0	1	1	3	1	1	2	2	1	2	1	2	1	2	2	1
OG0002102	1	1	1	0	1	1	8	2	1	1	1	1	1	2	1	1	1	1
OG0002103	1	1	3	0	3	2	1	1	1	1	0	4	1	3	1	1	1	1
OG0002104	1	1	1	1	3	1	3	1	1	1	2	1	1	3	1	2	1	1
OG0002105	1	1	2	1	3	3	1	1	1	3	1	1	1	1	1	1	2	1
OG0002106	1	1	2	1	1	2	1	1	1	1	1	5	1	1	1	2	2	1
OG0002107	1	1	1	0	2	5	1	0	1	4	1	4	0	2	1	0	1	1
OG0002108	1	1	1	1	2	1	2	1	1	3	1	2	1	3	1	1	2	1
OG0002109	2	1	1	1	2	2	1	1	1	1	1	4	1	2	1	1	1	2
OG0002110	2	1	1	0	2	2	1	1	1	2	1	2	1	2	1	1	3	2
OG0002111	1	1	1	1	2	3	1	1	1	2	1	3	1	2	2	1	1	1
OG0002112	1	1	2	1	2	1	1	1	1	1	1	5	0	4	2	0	0	2
OG0002113	1	2	1	0	5	2	0	1	1	3	1	2	1	1	1	2	1	1
OG0002114	1	1	2	0	3	2	1	0	1	1	1	3	1	1	2	2	1	3
OG0002115	1	1	0	1	5	3	1	1	1	2	0	3	1	1	0	1	3	1
OG0002116	1	3	1	1	2	1	2	1	2	1	2	1	1	1	2	1	1	2
OG0002117	3	1	1	2	1	2	0	2	2	1	1	1	1	1	2	1	2	2
OG0002118	1	1	1	1	1	3	1	1	1	3	1	3	1	3	1	1	1	1
OG0002119	1	1	1	1	2	1	1	1	2	1	4	1	1	2	1	1	1	3
OG0002120	1	1	2	1	3	1	1	1	1	1	3	2	1	1	1	2	2	1
OG0002121	1	1	2	1	2	4	1	1	1	2	1	3	1	2	0	1	1	1
OG0002122	2	1	2	2	3	0	1	0	1	0	1	6	1	0	1	2	2	1
OG0002123	1	1	2	1	1	2	0	1	4	1	1	2	2	1	1	1	3	1
OG0002124	1	1	1	1	2	7	0	1	1	1	1	3	1	1	1	1	1	1
OG0002125	2	1	1	1	2	3	1	2	1	2	1	2	1	2	1	1	1	1
OG0002126	1	1	1	1	1	3	1	1	1	3	1	4	1	1	1	1	1	2
OG0002127	1	1	1	1	3	3	2	1	1	2	1	3	1	1	1	1	1	1
OG0002128	1	1	1	1	1	3	1	1	1	2	1	3	1	1	1	3	2	1
OG0002129	1	1	1	1	4	1	1	1	1	1	0	1	1	1	1	6	2	1
OG0002130	1	1	2	0	1	2	2	1	1	1	1	3	1	1	2	3	1	2
OG0002131	1	1	1	1	3	4	1	1	1	2	1	2	1	2	1	1	1	1
OG0002132	2	2	1	1	2	2	1	1	1	2	1	2	1	2	2	1	1	1
OG0002133	1	1	1	1	4	2	1	1	1	2	1	4	1	2	1	1	0	1
OG0002134	1	0	0	1	7	2	2	1	0	1	4	3	0	1	1	1	0	1
OG0002135	1	1	2	1	2	3	1	1	1	3	1	2	2	1	1	1	1	1
OG0002136	1	1	1	1	5	1	1	1	2	1	0	1	2	3	1	1	2	1
OG0002137	1	1	1	2	1	1	2	2	1	2	1	1	1	1	1	2	3	2
OG0002138	1	1	1	1	1	4	1	1	1	2	1	3	1	2	1	2	1	1
OG0002139	1	1	1	0	3	3	4	1	1	3	1	2	1	1	1	1	0	1
OG0002140	1	1	2	1	3	3	1	0	1	3	1	3	1	1	1	1	1	1
OG0002141	1	1	1	1	1	2	2	1	6	2	1	1	1	1	1	1	1	1
OG0002142	1	1	2	1	1	2	1	2	4	1	2	1	1	2	1	1	1	1
OG0002143	1	1	1	1	3	2	1	1	1	2	2	2	1	2	1	2	1	1
OG0002144	1	1	1	1	3	3	1	1	1	3	1	2	1	2	1	1	1	1
OG0002145	1	1	1	2	1	2	1	2	1	2	1	3	2	1	1	1	2	1
OG0002146	1	2	1	1	2	1	2	1	1	2	1	1	1	2	1	4	1	1
OG0002147	1	1	1	4	1	1	1	1	2	1	1	2	1	3	1	2	1	1
OG0002148	1	2	1	1	3	1	1	1	1	1	1	2	1	2	1	1	4	1
OG0002149	1	1	1	1	3	2	1	1	1	1	2	5	0	1	1	1	2	1
OG0002150	1	2	2	1	3	2	0	1	1	2	1	4	1	1	1	1	1	1
OG0002151	1	1	0	1	2	2	1	1	2	2	2	5	1	1	1	1	1	1
OG0002152	2	1	1	3	1	2	1	1	1	2	1	3	1	1	1	1	2	1
OG0002153	1	1	1	1	1	4	1	1	1	3	1	3	1	1	1	1	2	1
OG0002154	1	1	1	1	1	2	2	2	3	3	1	1	1	2	1	1	1	1
OG0002155	1	1	1	1	2	3	1	1	1	2	2	2	1	1	1	1	1	3
OG0002156	1	1	1	2	1	3	1	1	1	4	2	1	1	1	1	1	2	1
OG0002157	1	1	1	1	3	2	1	1	1	2	1	4	1	1	1	2	1	1
OG0002158	1	1	2	1	2	2	1	1	1	2	2	3	1	1	2	1	1	1
OG0002159	1	2	2	1	1	0	1	1	2	0	1	4	1	1	2	2	2	2
OG0002160	1	1	2	1	4	2	1	1	1	2	1	1	1	2	1	1	1	2
OG0002161	1	1	1	0	2	1	2	1	1	0	1	3	1	7	1	1	1	1
OG0002162	1	1	2	1	1	2	1	1	1	2	4	1	1	1	2	1	1	2
OG0002163	1	1	2	1	2	1	2	1	1	1	1	2	4	1	1	2	1	1
OG0002164	1	1	1	1	1	2	1	2	2	1	1	3	1	1	1	4	1	1
OG0002165	1	1	1	3	1	6	1	0	1	2	1	2	1	1	0	1	2	1
OG0002166	2	1	0	1	3	1	1	1	1	1	1	2	3	2	1	1	3	1
OG0002167	1	1	1	3	1	1	1	1	1	1	3	1	1	3	1	1	2	2
OG0002168	1	1	1	1	2	1	1	1	1	1	2	3	2	4	1	1	1	1
OG0002169	2	1	0	1	2	3	1	1	1	2	1	4	1	1	1	2	2	0
OG0002170	1	1	1	1	3	3	1	0	1	2	1	2	3	2	1	1	1	1
OG0002171	1	1	2	1	2	2	2	1	1	1	2	3	1	1	2	1	1	1
OG0002172	1	1	1	1	2	3	1	4	1	2	1	2	1	1	1	1	1	1
OG0002173	1	1	1	3	1	2	1	1	1	3	1	2	1	1	1	3	1	1
OG0002174	1	1	1	1	2	3	1	3	1	3	0	2	1	2	1	1	1	1
OG0002175	1	2	2	1	4	0	1	1	1	1	2	1	1	3	1	2	1	1
OG0002176	1	1	1	1	1	5	1	1	1	3	1	2	1	2	1	1	1	1
OG0002177	1	2	1	1	2	0	3	1	2	0	0	6	1	3	1	1	0	1
OG0002178	1	2	1	1	2	1	3	1	1	1	1	1	0	2	2	3	1	2
OG0002179	1	1	1	2	2	3	1	1	1	3	1	2	1	2	1	1	1	1
OG0002180	1	1	1	1	1	4	1	1	1	1	2	3	2	2	1	1	1	1
OG0002181	1	1	1	1	5	3	1	1	1	2	1	2	2	1	1	0	1	1
OG0002182	1	1	2	1	1	3	1	0	2	2	0	2	1	3	2	1	2	1
OG0002183	2	1	2	0	2	0	3	1	2	0	1	2	0	3	2	1	2	2
OG0002184	1	1	1	1	4	3	1	1	1	3	1	1	1	1	1	1	2	1
OG0002185	1	1	1	1	3	3	1	1	1	3	1	3	1	1	1	1	1	1
OG0002186	1	1	1	1	3	2	1	1	1	2	2	3	1	1	1	2	1	1
OG0002187	0	1	1	0	2	4	0	0	1	4	1	6	1	2	1	1	0	1
OG0002188	0	2	1	1	4	1	1	1	1	1	1	1	4	4	1	1	0	1
OG0002189	0	2	1	1	1	4	1	1	2	2	1	2	1	1	2	1	1	2
OG0002190	0	1	1	0	3	4	1	0	1	4	1	4	1	1	1	1	1	1
OG0002191	0	1	1	1	2	1	1	3	1	1	1	1	1	1	1	1	7	1
OG0002192	0	1	2	1	1	2	2	0	1	2	6	2	0	1	1	3	0	1
OG0002193	0	1	2	1	3	4	1	1	1	2	1	4	0	2	1	1	1	0
OG0002194	0	1	1	0	4	4	1	1	1	2	1	2	0	4	1	2	0	1
OG0002195	0	1	1	1	3	3	2	0	1	2	1	2	1	2	0	4	1	1
OG0002197	0	1	1	1	6	3	1	1	1	2	1	1	2	1	1	1	1	1
OG0002198	0	1	2	1	2	5	2	0	1	3	1	2	1	2	1	1	0	1
OG0002199	0	1	1	0	1	2	1	1	1	9	1	2	2	1	1	0	1	1
OG0002201	0	1	1	1	3	4	1	0	1	2	1	6	0	2	1	1	0	1
OG0002202	0	2	2	0	1	4	2	0	1	3	1	4	1	1	2	0	1	1
OG0002203	0	2	1	1	2	5	0	1	2	2	1	1	2	1	2	1	1	1
OG0002204	0	1	1	1	2	4	2	0	1	4	1	4	1	1	1	1	0	1
OG0002205	0	1	1	1	2	5	1	0	1	6	1	3	0	1	1	0	1	1
OG0002206	0	1	1	1	4	4	1	1	1	2	1	1	1	3	1	1	1	1
OG0002207	0	1	1	1	1	2	2	1	1	3	1	3	1	3	1	1	1	2
OG0002208	0	1	1	1	2	8	0	0	0	5	0	1	0	1	4	1	0	1
OG0002209	0	1	2	0	5	1	6	0	1	1	2	1	1	2	1	1	0	1
OG0002210	0	1	1	2	2	4	1	1	1	3	1	2	1	1	1	2	1	1
OG0002211	0	1	1	0	3	4	1	0	1	3	1	5	1	2	1	1	0	1
OG0002212	0	1	1	0	5	4	1	2	0	2	1	3	1	1	0	1	2	1
OG0002214	0	1	0	3	2	1	1	2	1	2	1	2	1	2	1	3	1	2
OG0002215	0	0	7	3	3	1	2	0	0	2	0	1	0	1	1	2	0	3
OG0002217	0	0	1	1	3	3	1	1	1	2	2	5	0	1	2	2	0	1
OG0002218	0	0	2	0	3	1	2	1	0	1	3	1	0	3	2	5	1	1
OG0002219	0	0	1	3	3	1	1	1	1	1	2	1	2	3	1	2	2	1
OG0002224	1	1	1	1	1	1	2	1	1	1	1	1	1	1	1	2	6	1
OG0002225	1	1	1	1	5	2	2	1	1	2	1	1	1	1	1	1	1	1
OG0002226	1	2	2	1	2	1	1	1	1	1	1	1	1	4	1	1	1	2
OG0002227	1	1	2	1	2	2	1	3	1	1	2	3	0	1	1	1	1	1
OG0002228	1	1	1	1	3	3	1	0	1	1	1	4	1	1	1	2	1	1
OG0002229	1	1	2	1	3	1	1	1	1	3	1	2	1	1	1	2	1	1
OG0002230	1	1	1	1	2	1	2	1	1	1	2	1	1	3	1	1	3	1
OG0002231	1	1	1	0	2	5	1	1	1	2	1	3	1	1	1	1	1	1
OG0002232	1	2	1	0	2	0	2	1	0	0	2	7	1	1	1	1	2	1
OG0002233	1	1	1	0	1	3	0	1	2	1	1	3	0	2	3	2	1	2
OG0002234	1	1	1	1	4	3	1	1	1	2	0	2	1	2	1	1	1	1
OG0002235	2	1	2	1	2	1	1	1	1	1	1	1	5	1	1	1	1	1
OG0002236	1	1	0	1	4	3	1	1	1	2	1	2	2	1	1	1	1	1
OG0002237	1	3	1	1	1	2	1	2	2	2	1	1	1	1	1	1	1	2
OG0002238	1	1	1	1	3	2	1	2	1	2	1	1	1	1	1	0	4	1
OG0002239	3	1	1	1	4	1	1	1	2	1	1	2	1	1	1	1	1	1
OG0002240	1	1	2	1	1	1	1	0	2	2	1	3	1	3	1	1	0	3
OG0002241	1	1	1	1	2	1	4	1	1	1	2	3	1	1	1	1	1	1
OG0002242	1	1	1	1	0	6	1	2	2	3	1	0	1	1	1	1	1	1
OG0002243	1	2	1	1	2	3	1	1	1	2	1	2	1	2	1	1	1	1
OG0002244	1	2	1	2	2	4	1	0	1	3	1	2	1	1	1	1	0	1
OG0002245	1	0	0	1	4	4	1	1	0	2	2	4	1	2	0	1	1	0
OG0002246	2	0	1	1	1	2	1	1	0	3	1	6	1	2	1	0	1	1
OG0002247	1	1	1	1	2	2	1	2	1	2	1	3	1	2	1	1	1	1
OG0002248	1	2	2	2	1	1	2	1	2	1	1	1	1	2	1	1	1	2
OG0002249	1	1	2	1	4	2	1	1	1	1	1	3	1	1	1	1	1	1
OG0002250	1	1	1	1	2	2	2	1	1	2	1	4	1	1	1	1	1	1
OG0002251	1	2	2	2	1	2	1	1	1	1	2	2	1	2	1	1	1	1
OG0002252	1	1	2	1	1	4	1	1	1	2	1	2	1	2	1	1	1	1
OG0002253	2	1	1	0	2	5	1	1	1	3	1	3	0	0	1	1	1	1
OG0002254	1	1	1	1	1	3	1	1	1	2	1	2	1	2	1	1	3	1
OG0002255	1	0	0	1	1	4	3	1	0	3	3	3	0	2	0	1	2	0
OG0002256	1	2	2	1	6	1	1	1	1	1	1	1	1	1	1	1	1	1
OG0002257	1	1	1	2	3	1	2	1	1	1	1	2	1	1	1	1	3	1
OG0002258	1	1	2	1	3	2	1	1	1	2	1	3	1	1	1	1	1	1
OG0002259	1	1	1	1	2	3	3	2	1	2	1	1	1	1	1	1	1	1
OG0002260	5	1	1	0	3	0	8	0	1	0	1	2	1	1	0	0	0	1
OG0002261	1	1	1	1	2	2	1	1	2	2	1	2	0	2	1	1	3	1
OG0002262	1	1	1	1	3	1	4	1	1	1	1	3	1	1	1	1	1	1
[truncated: 4,468 more rows]
