# Supplementary figures and images for: Genome streamlining in a minute herbivore that manipulates its host plant
Source: eLife journal article supplement (doi:10.7554/elife.56689), 2020-10-23

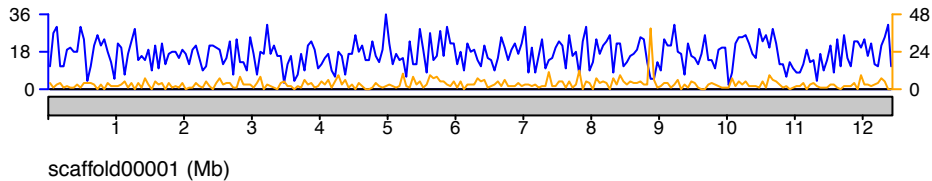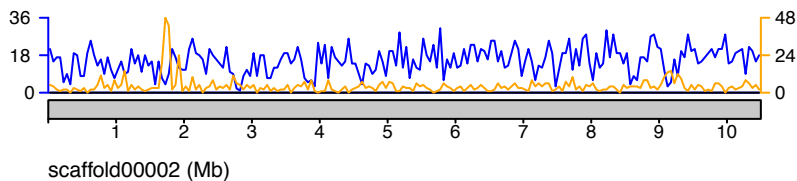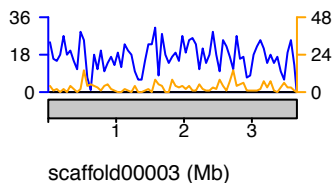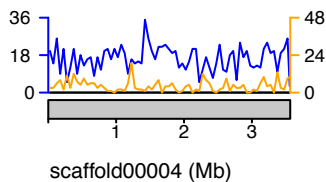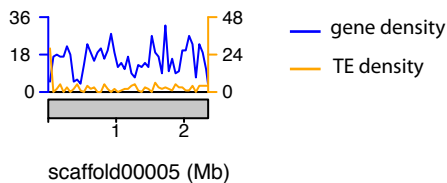

Supplement: supp [file elife-56689-supp-v1.zip]

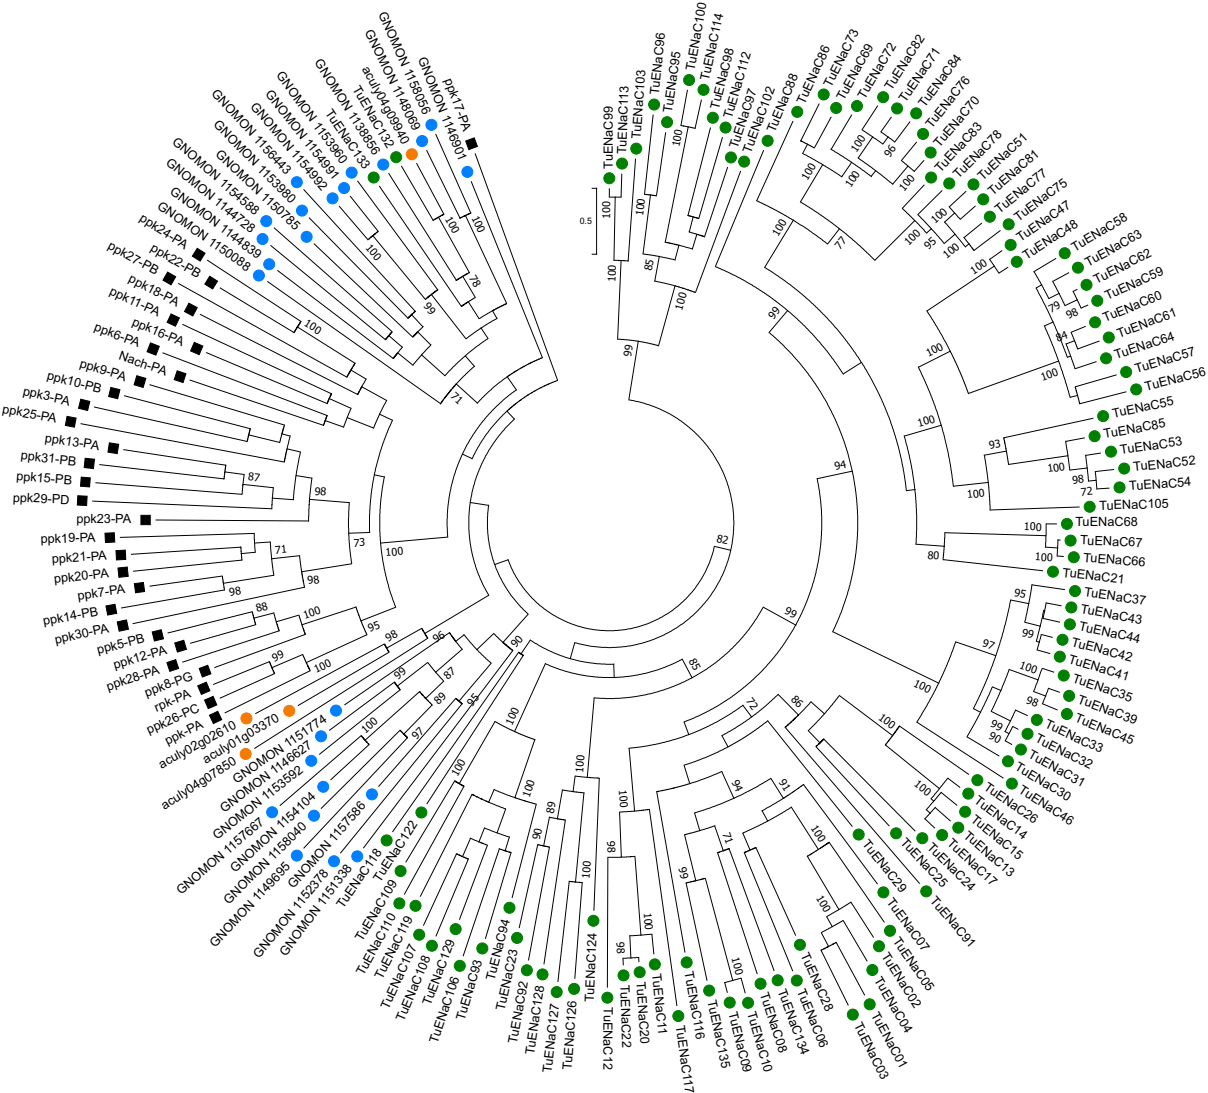

● *A. lycopersici* ● *T. urticae* ● *M. occidentalis* ■ *D. melanogaster*

Supplement: supp [file elife-56689-supp-v1.zip]

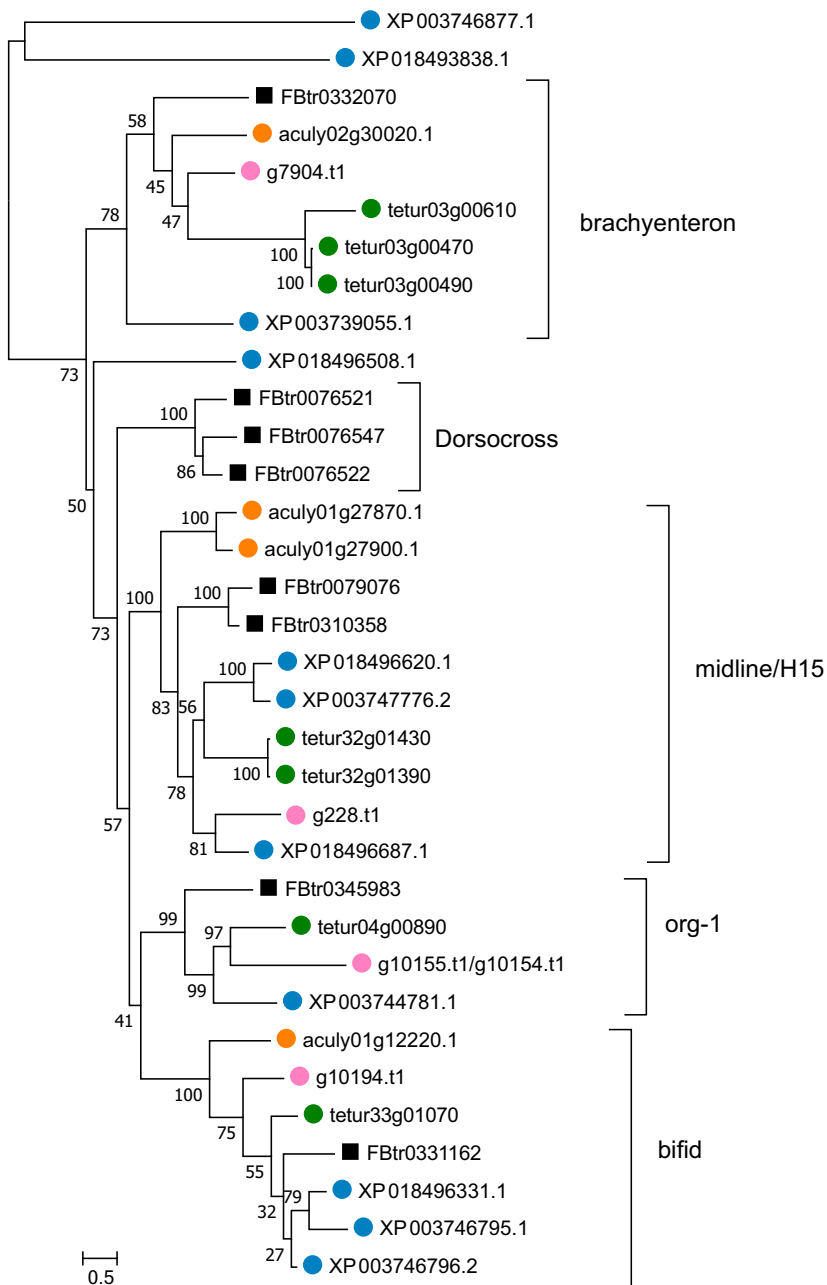

● *A. lycopersici*
● *T. urticae*
● *M. occidentalis*  
● *D. pteronyssinus*
■ *D. melanogaster*

Supplement: supp [file elife-56689-supp-v1.zip]

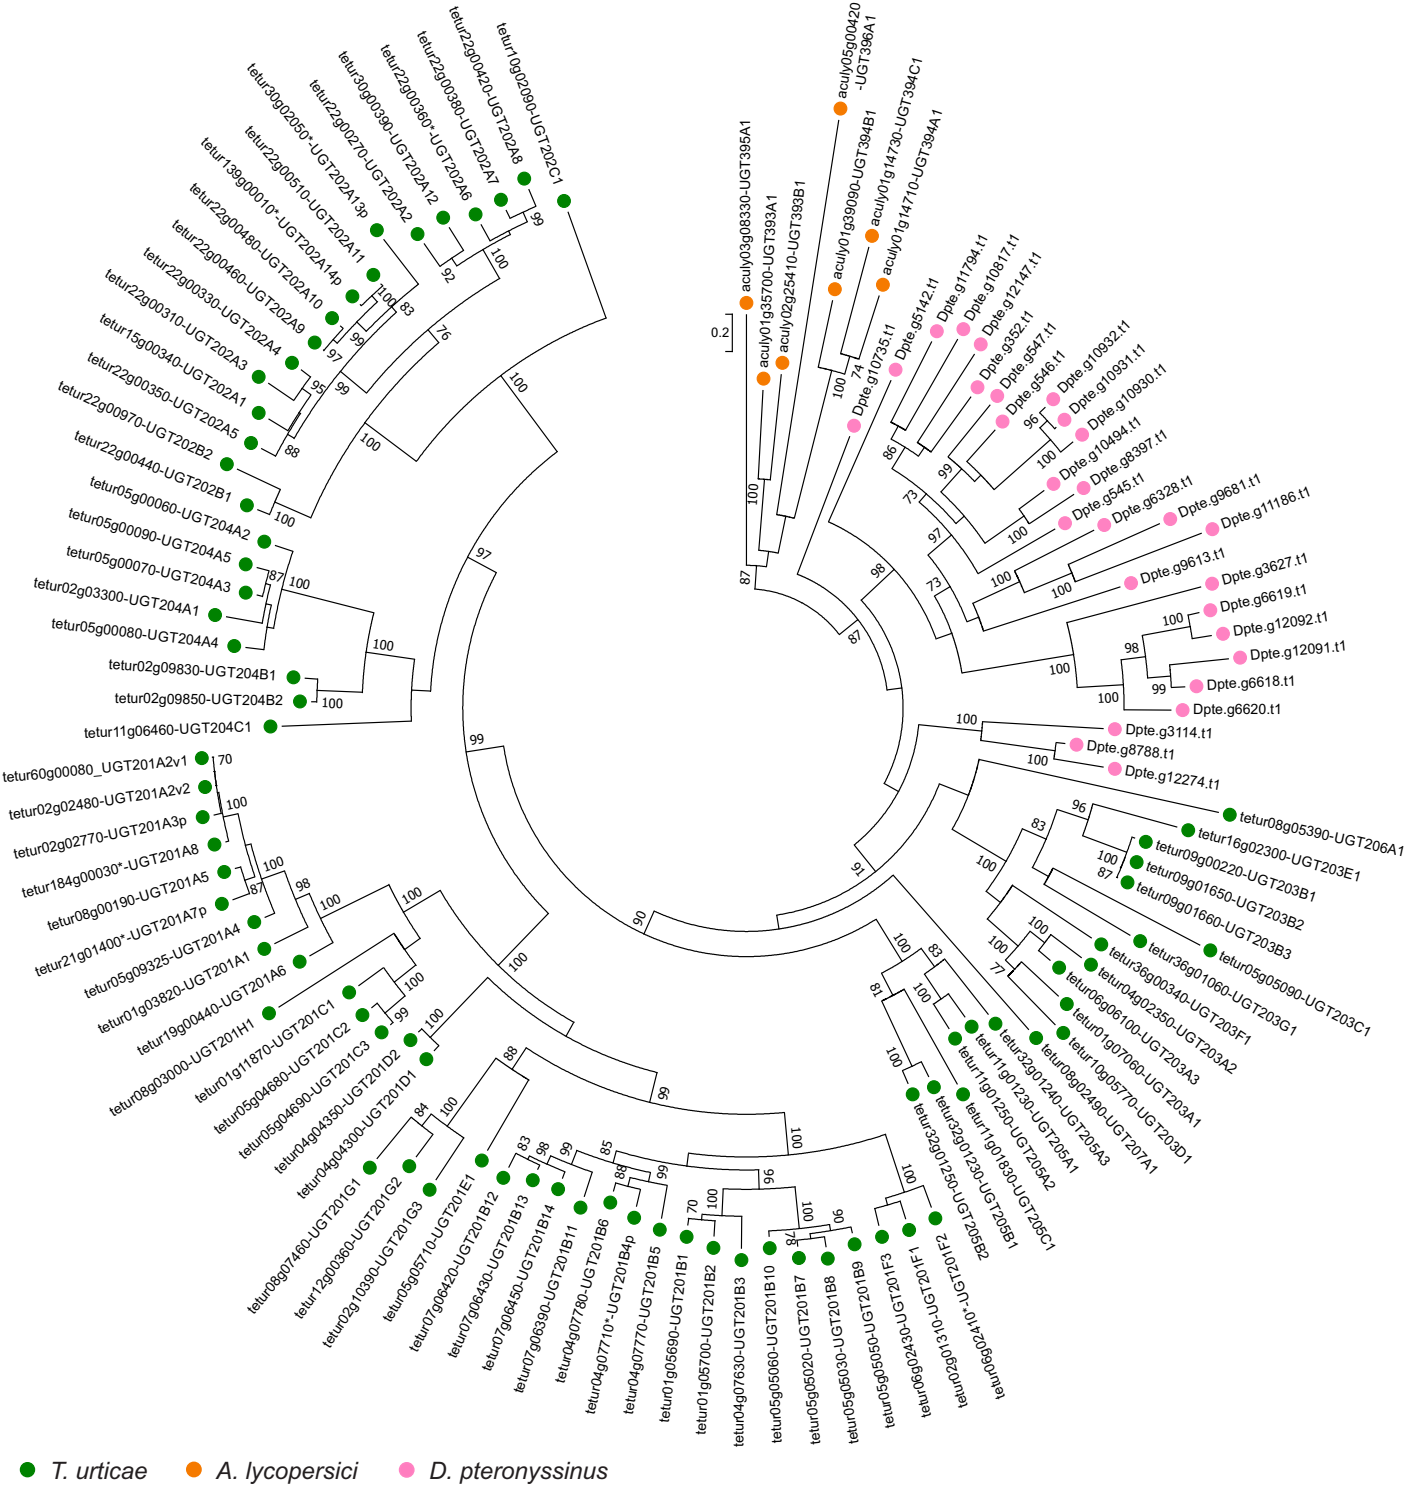

Supplement: supp [file elife-56689-supp-v1.zip]

# Median Length of All Introns by Position Across Species

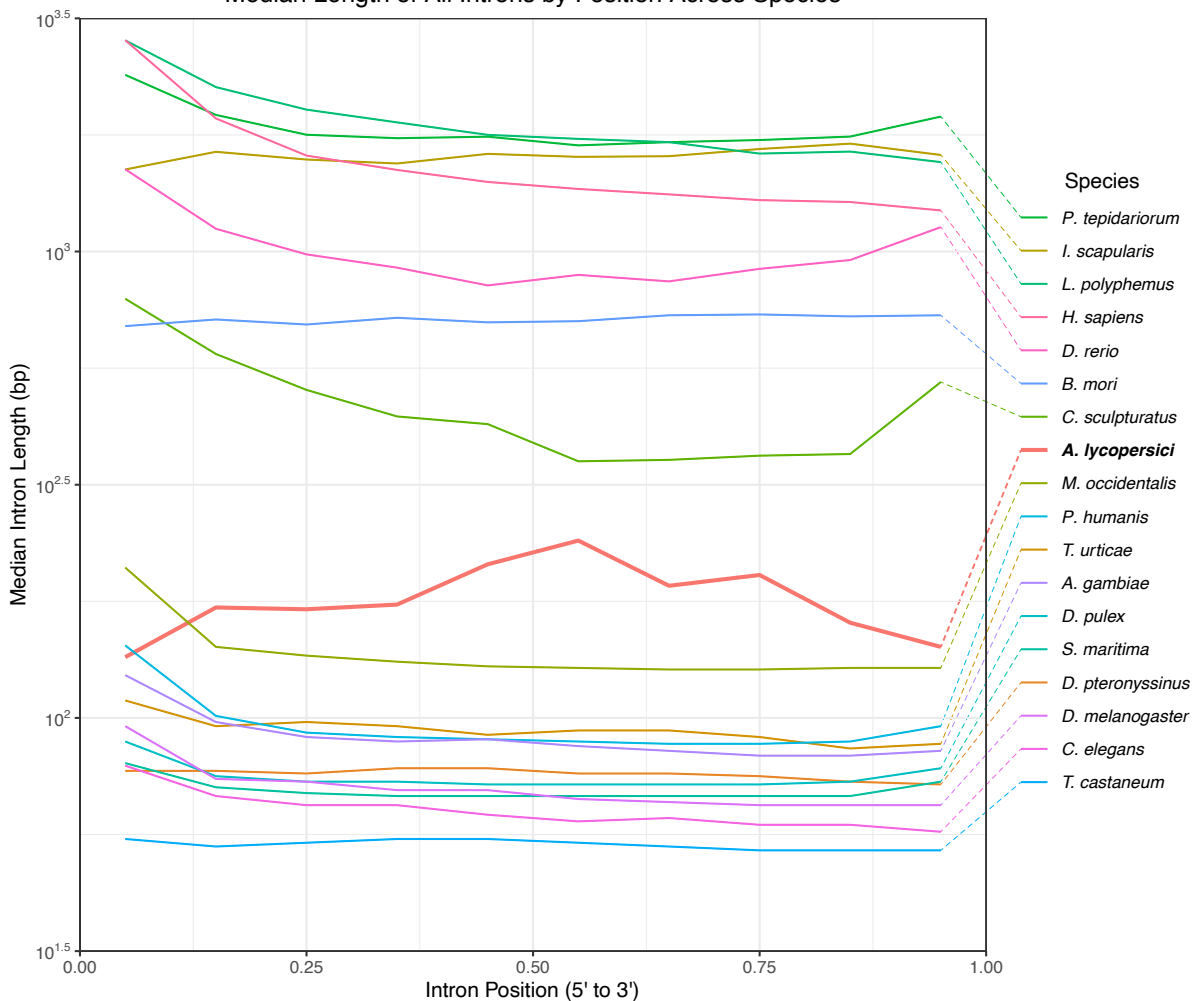

Supplement: supp [file elife-56689-supp-v1.zip]

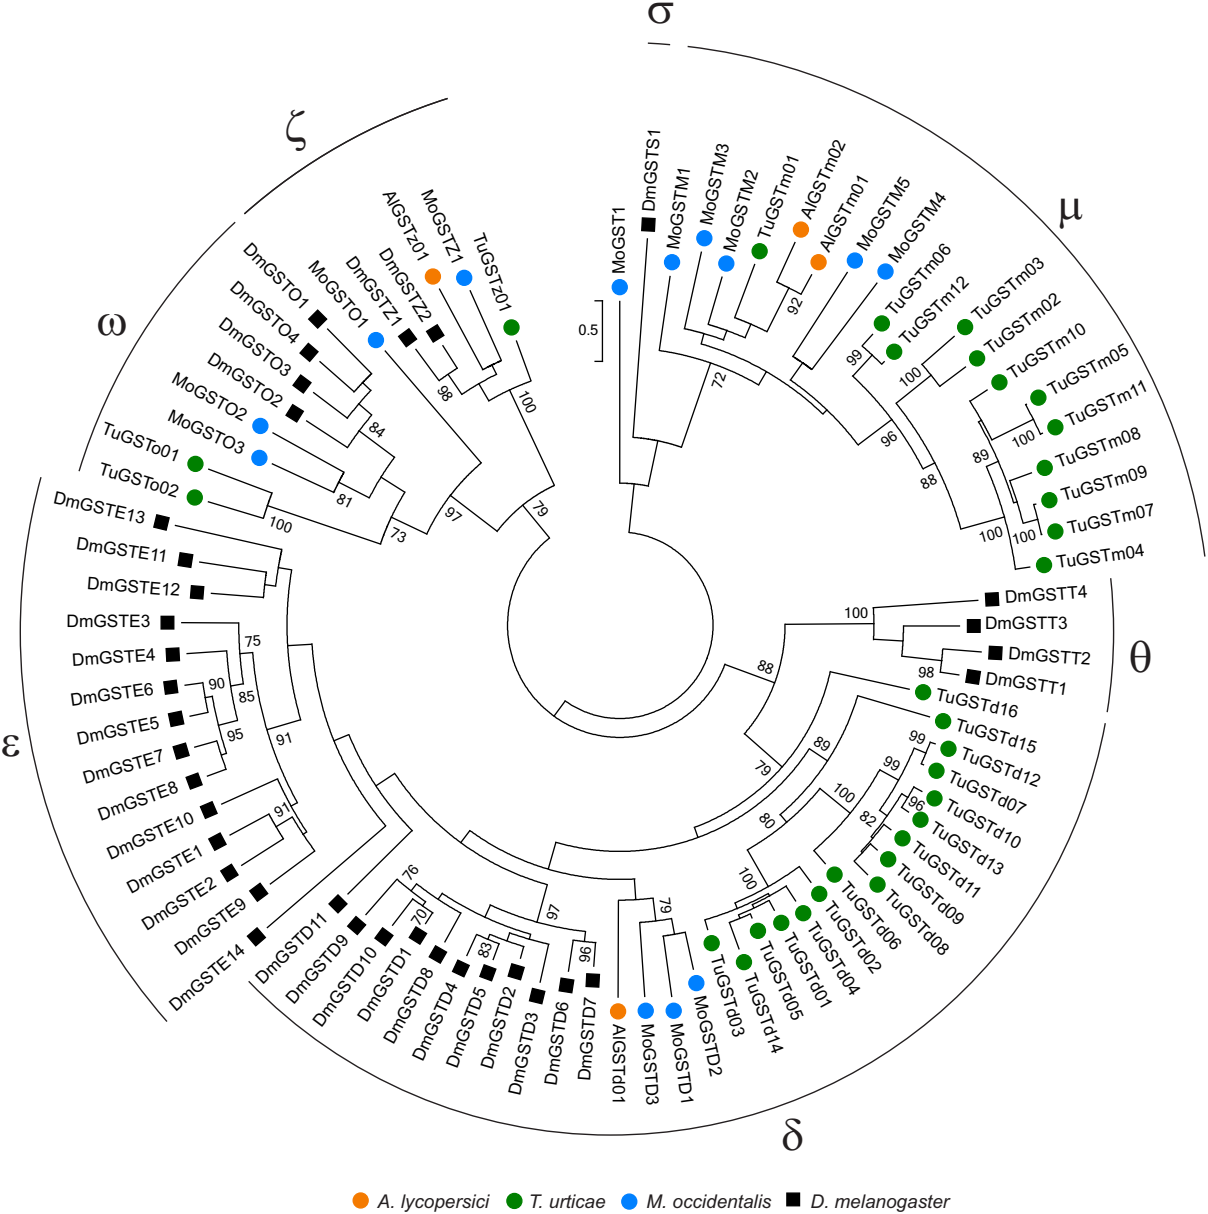

Supplement: supp [file elife-56689-supp-v1.zip]

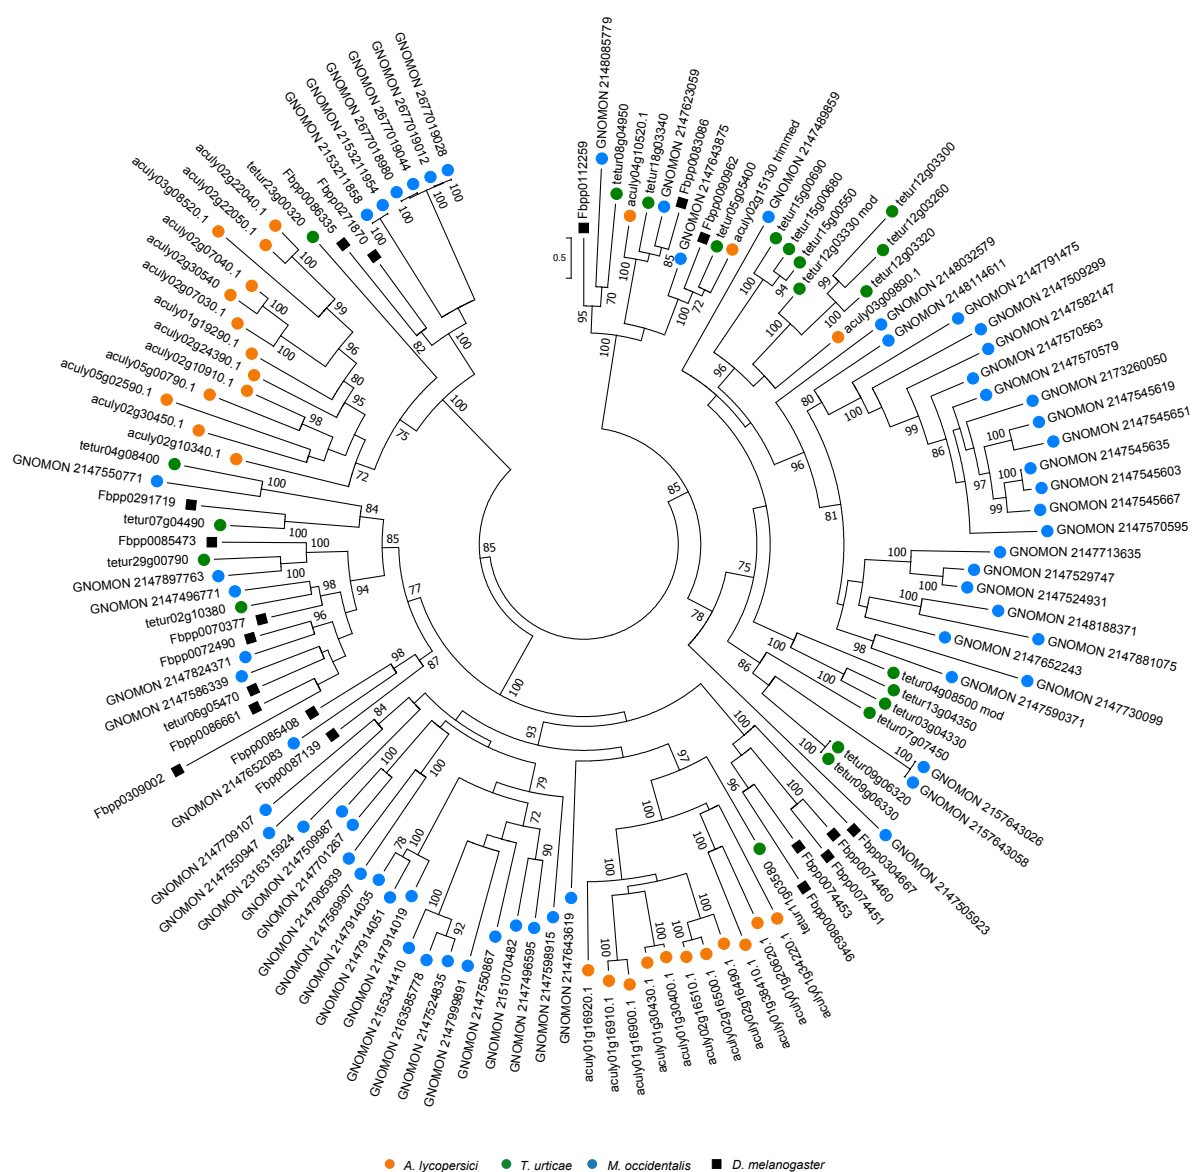

● *A. lycopersici* ● *T. urticae* ● *M. occidentalis* ■ *D. melanogaster*

Supplement: supp [file elife-56689-supp-v1.zip]

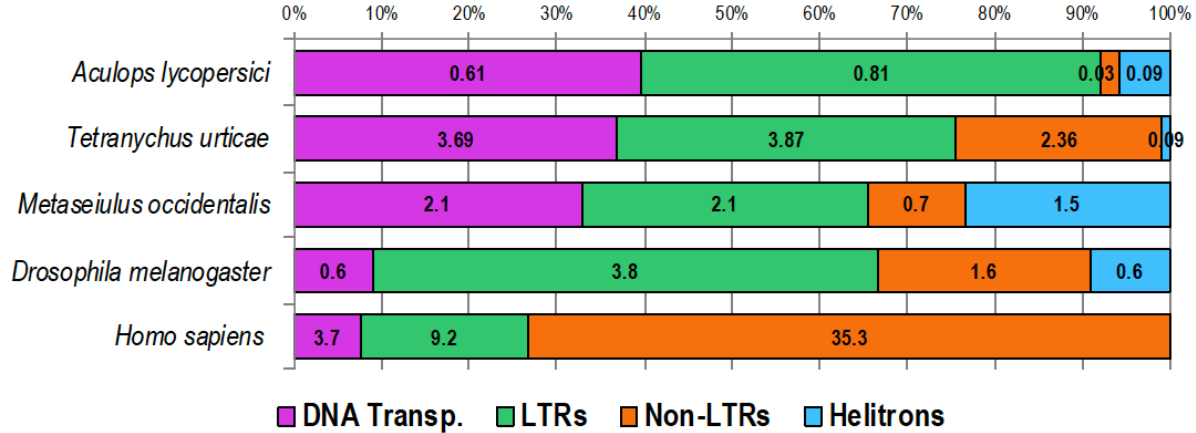

Supplement: supp [file elife-56689-supp-v1.zip]

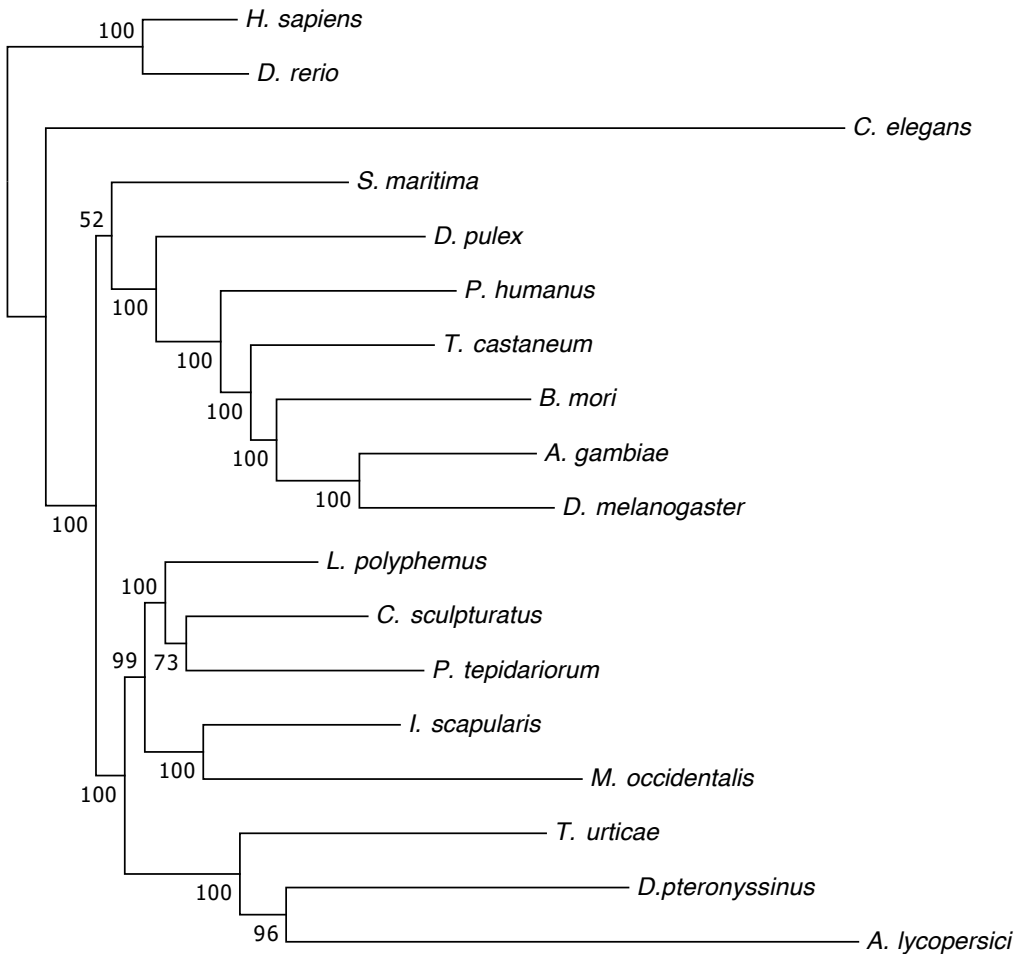

0.1

Supplement: supp [file elife-56689-supp-v1.zip]

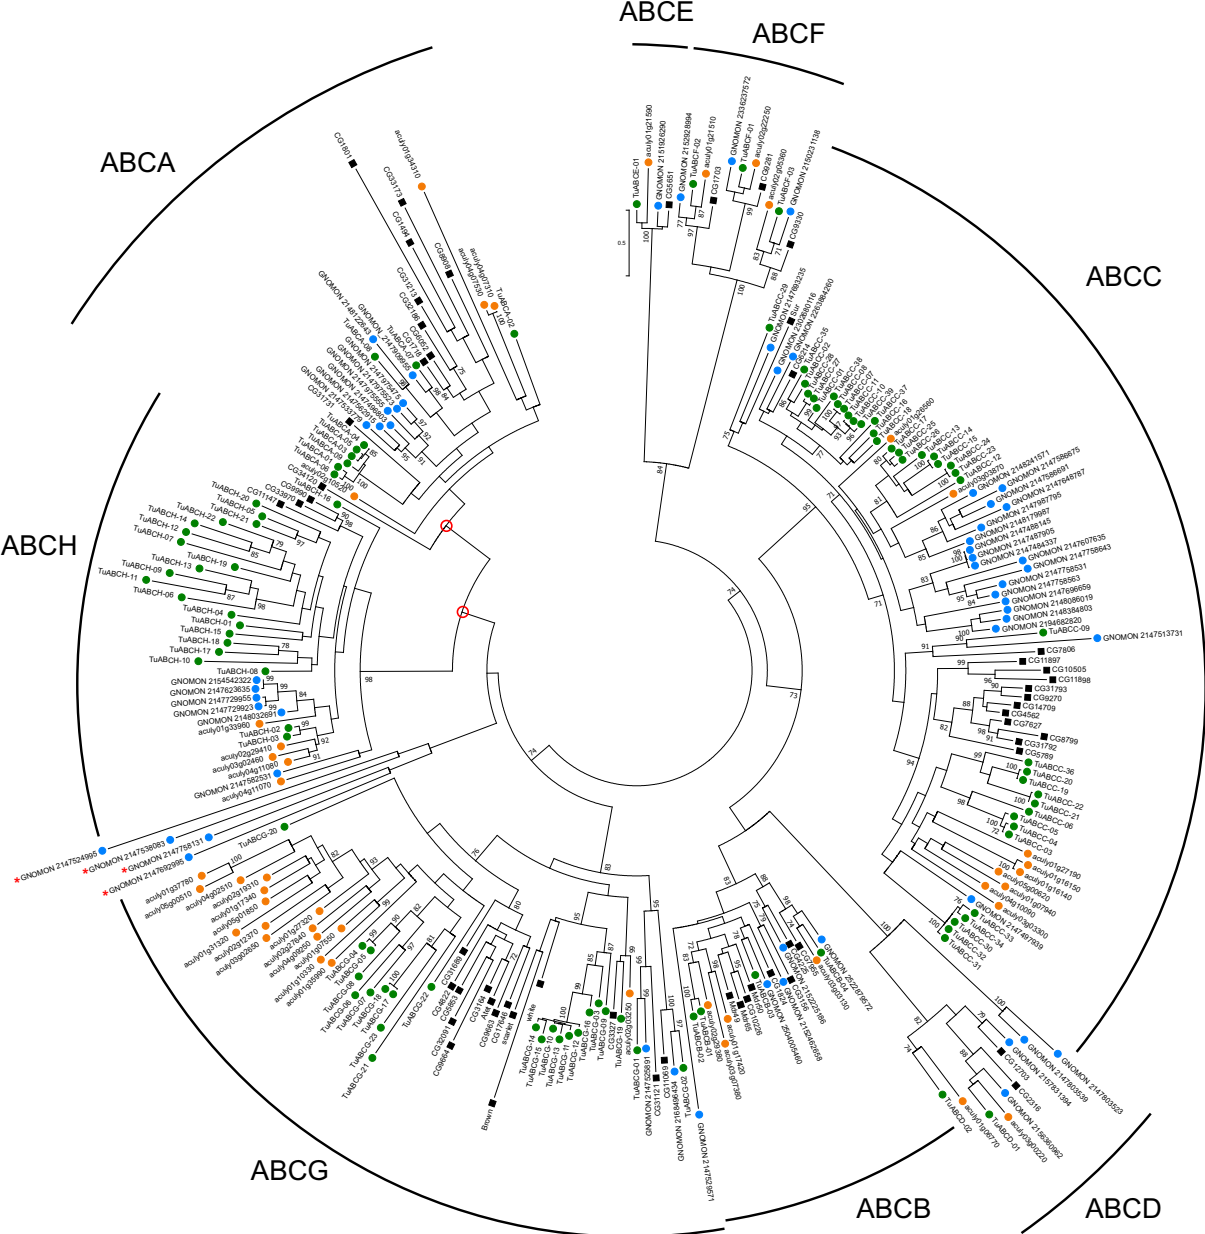

Supplement: supp [file elife-56689-supp-v1.zip]

# Density of Conserved Intron Positions by Species

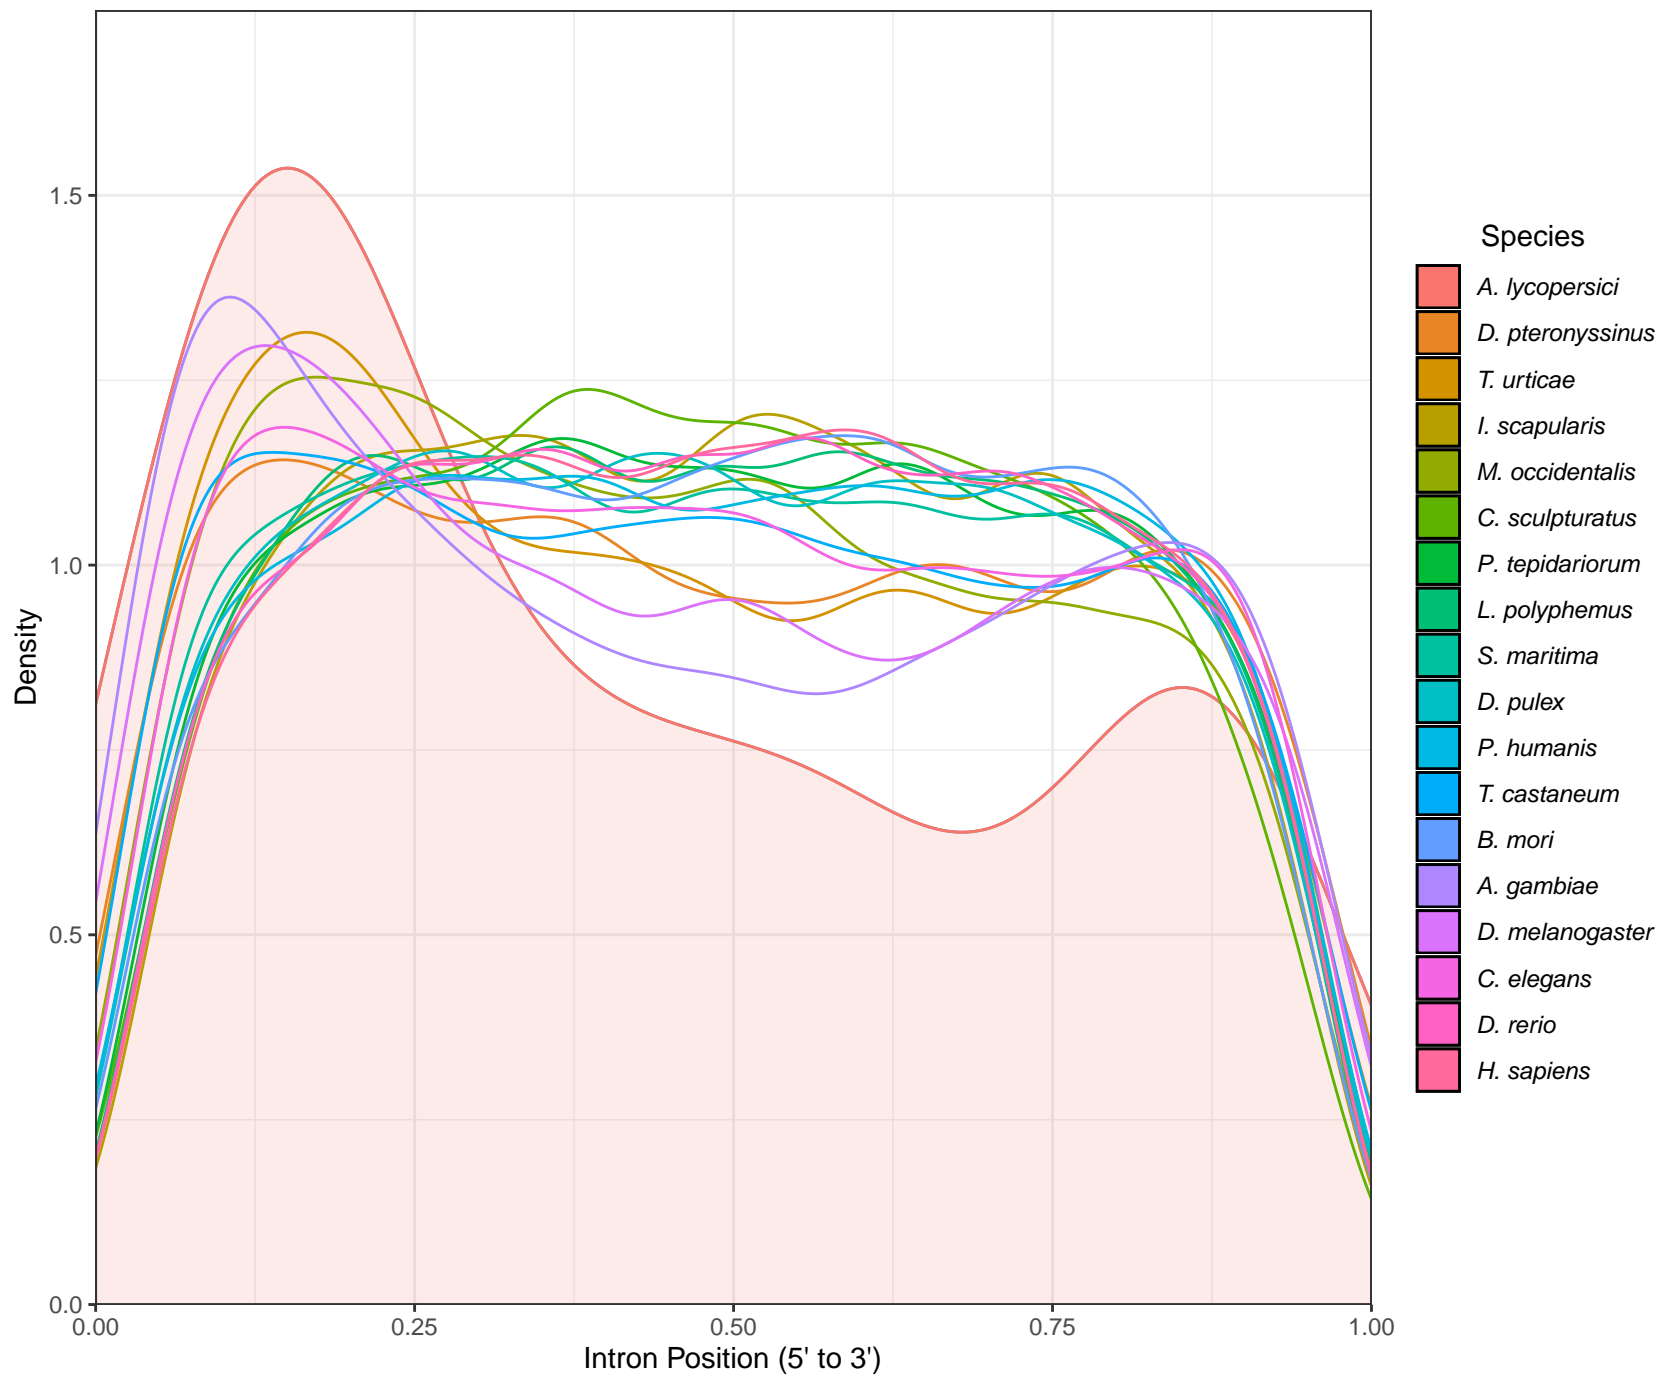

Supplement: supp [file elife-56689-supp-v1.zip]

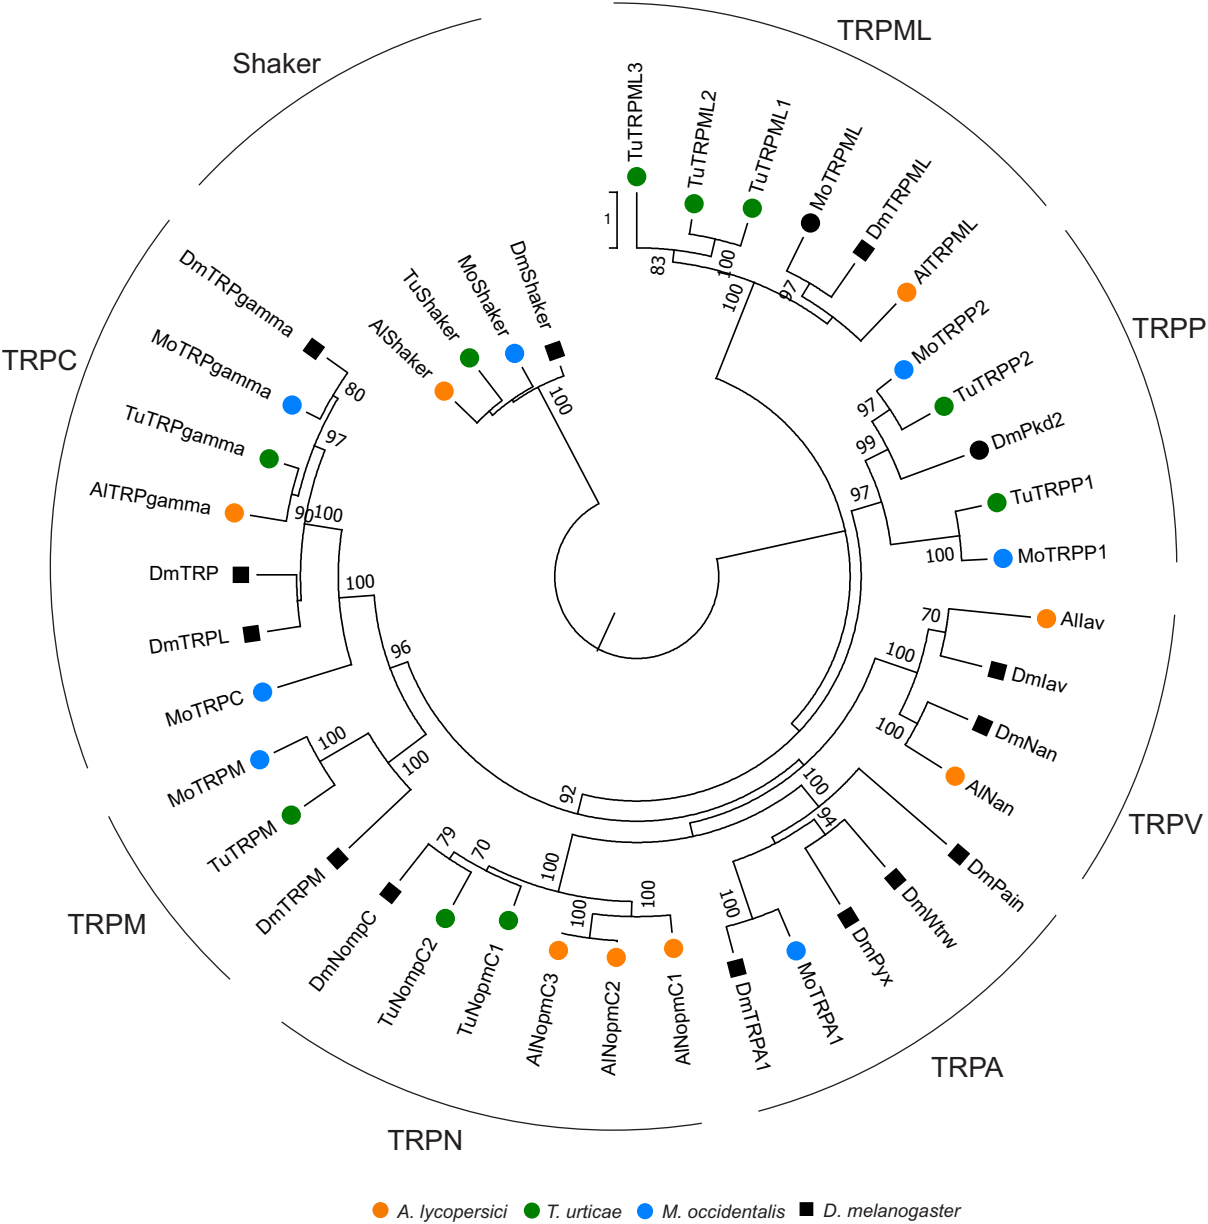

Supplement: supp [file elife-56689-supp-v1.zip]

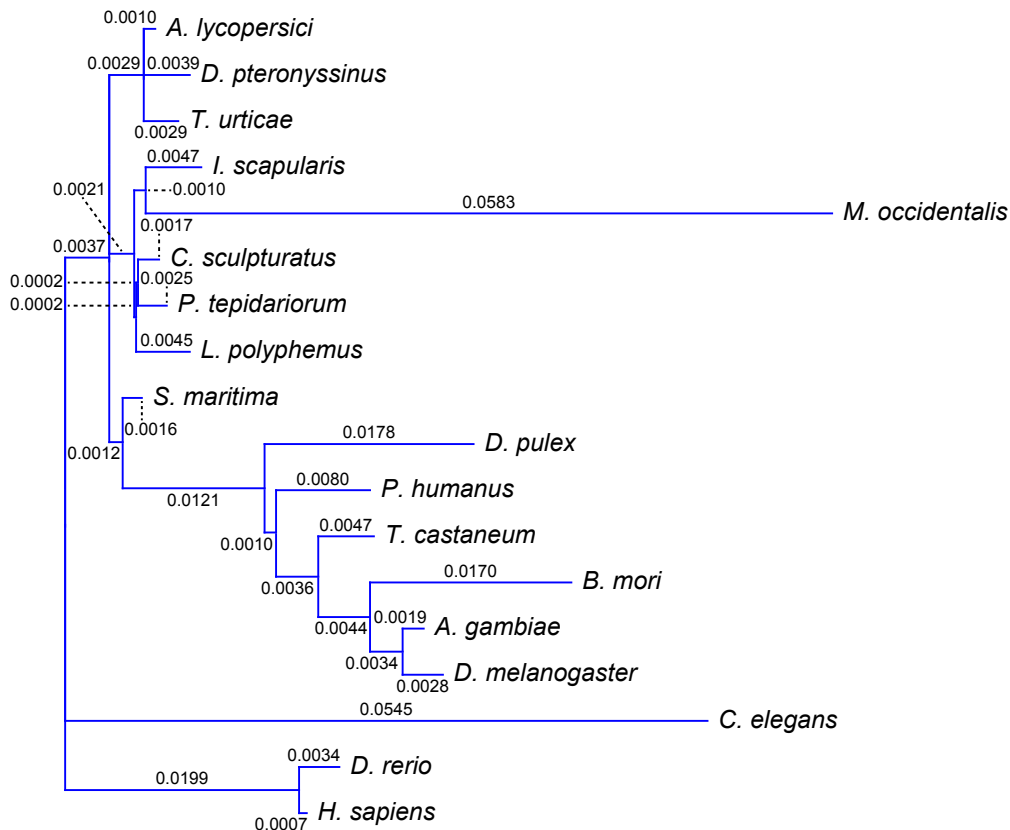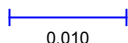

Supplement: supp [file elife-56689-supp-v1.zip]

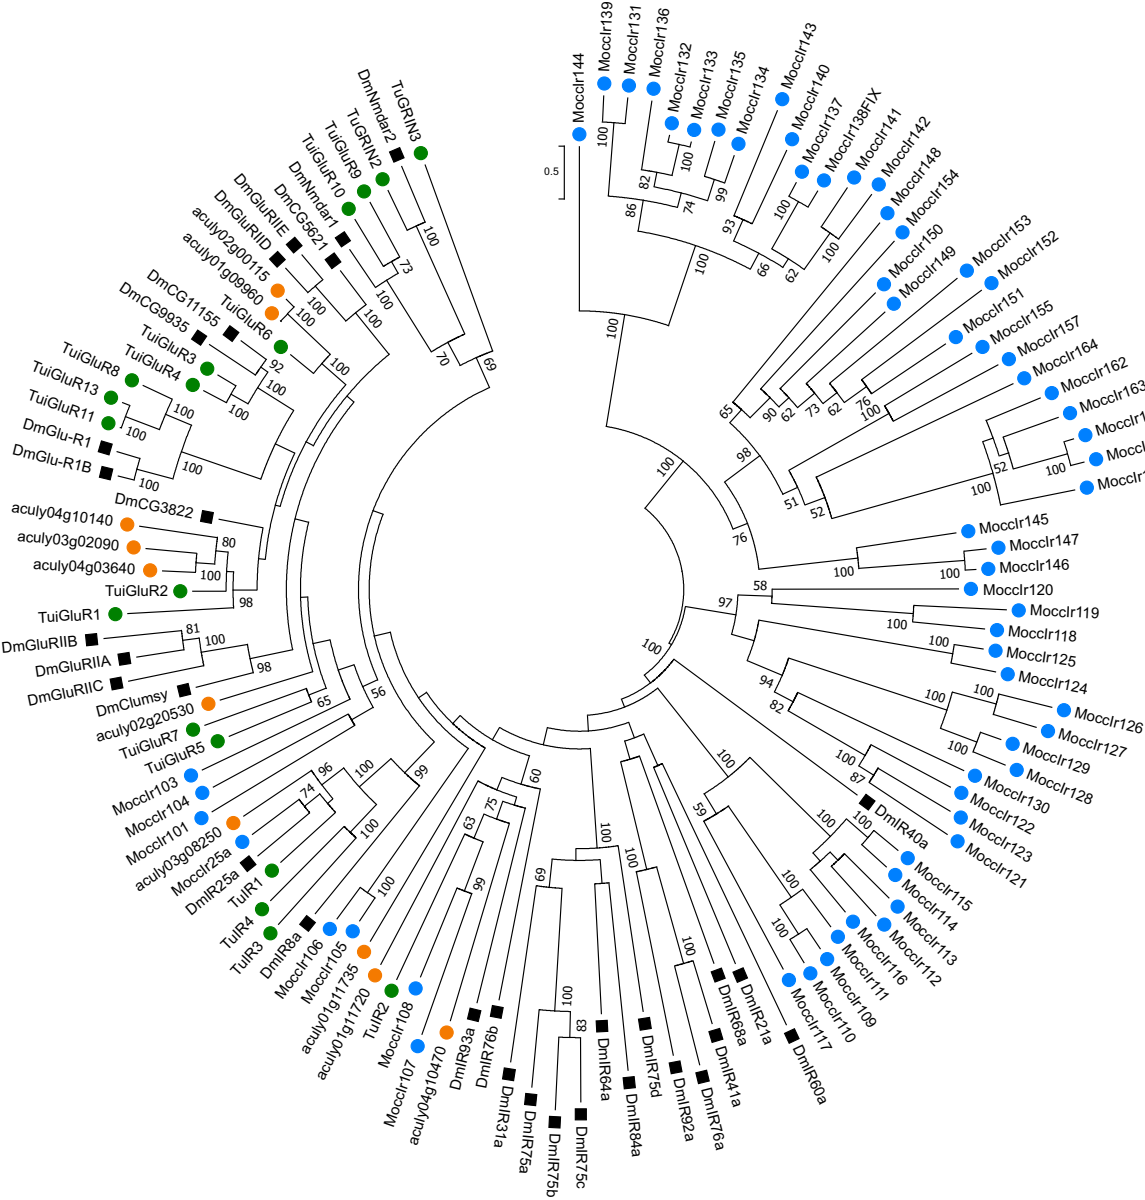

Supplement: supp [file elife-56689-supp-v1.zip]

— PF07527 (Hairy Orange domain) — PF00010.26 (bHLH domain)

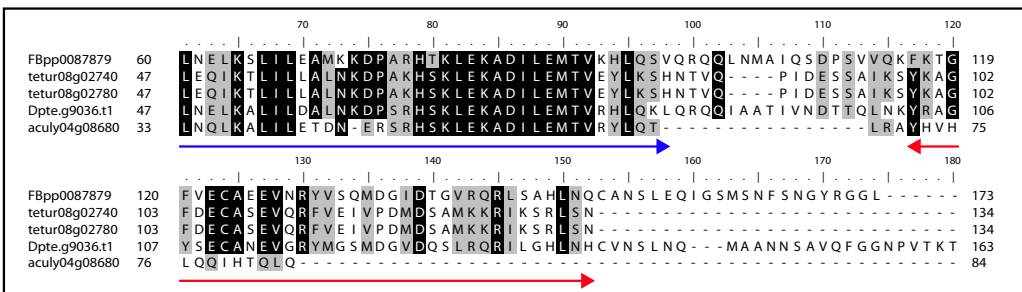

deadpan

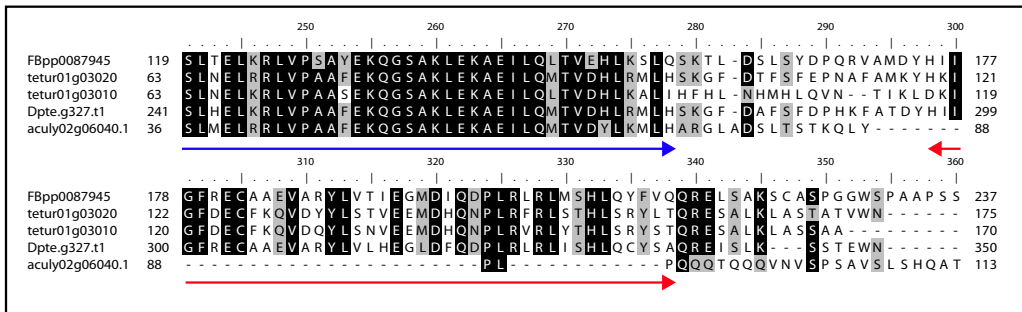

hey

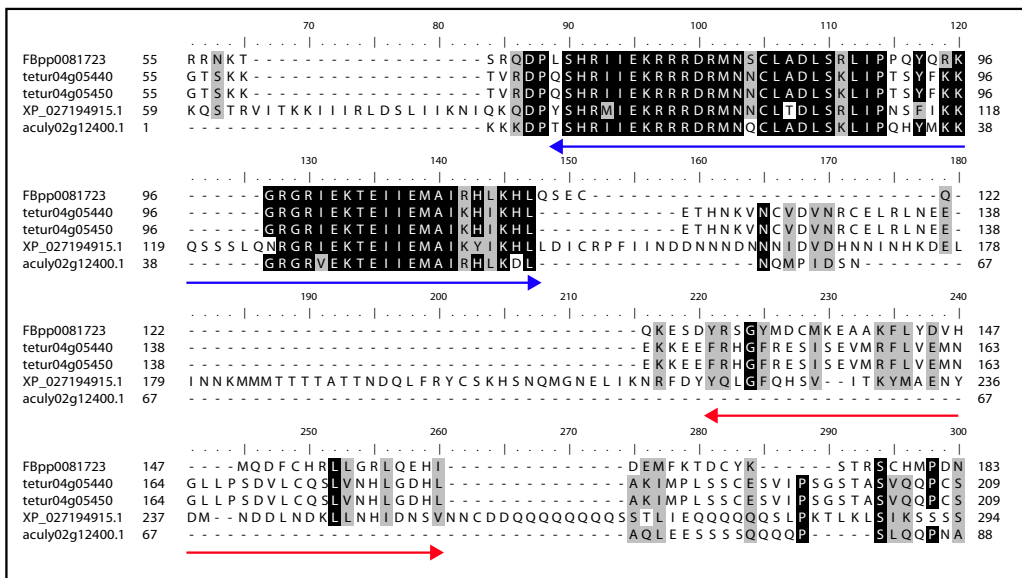

CWO

Supplement: supp [file elife-56689-supp-v1.zip]

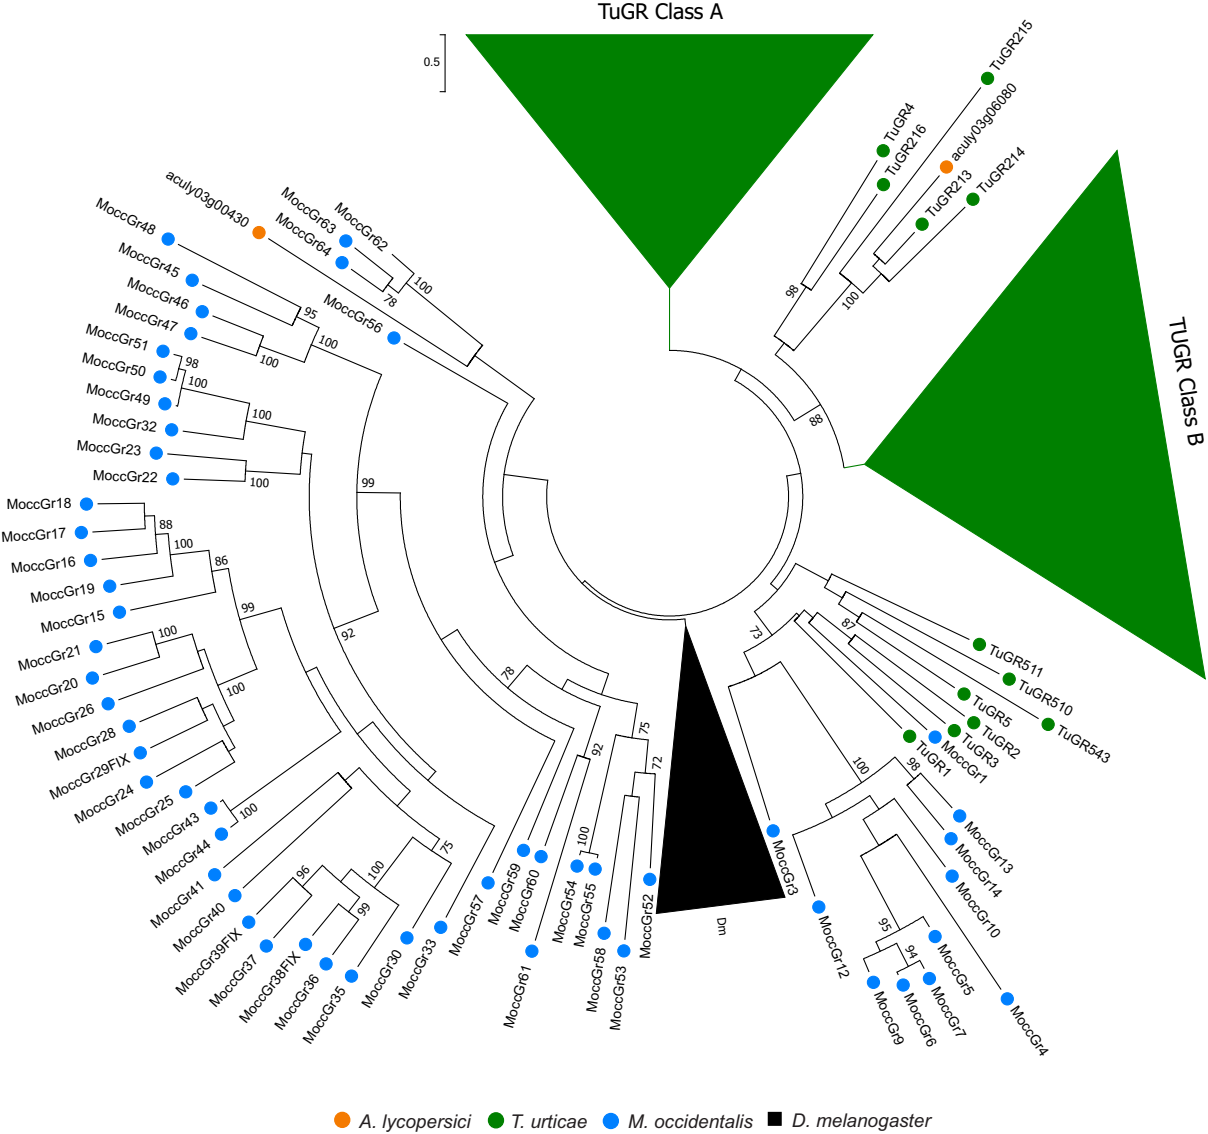

Supplement: supp [file elife-56689-supp-v1.zip]

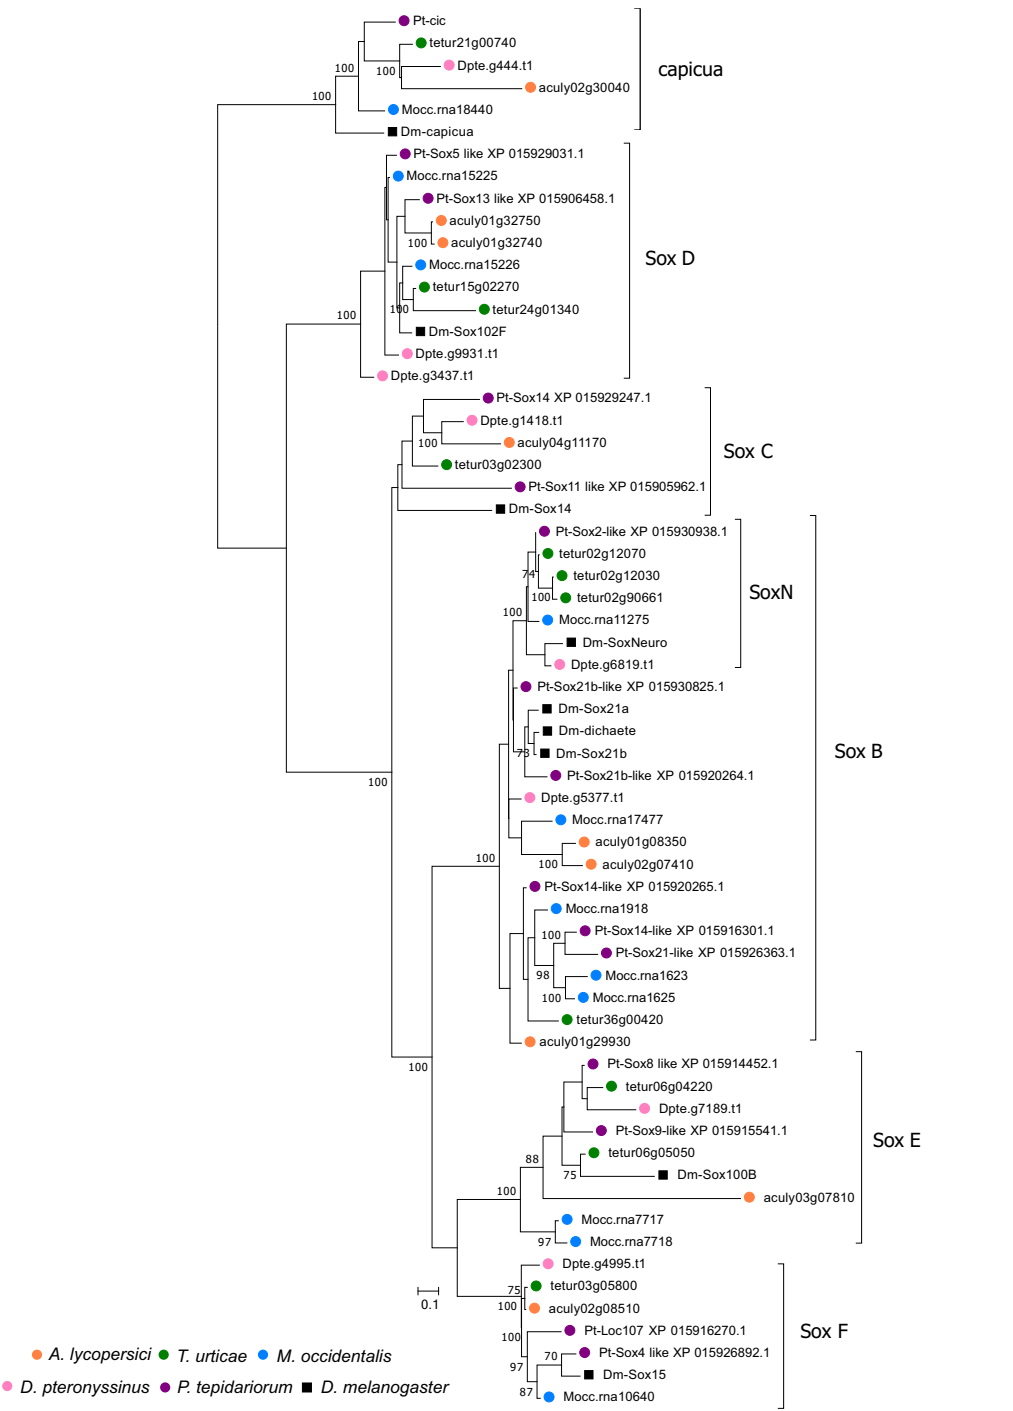

Supplement: supp [file elife-56689-supp-v1.zip]
